# Supplementary material for: Phenotypic Diversification Is Associated with Host-Induced Transposon Derepression in the Sudden Oak Death Pathogen Phytophthora ramorum
Source: PLoS One. 2012 Apr 18;7(4):e34728. doi: 10.1371/journal.pone.0034728 (PMC3329494; doi:10.1371/journal.pone.0034728)
Supplement: Dataset S1 — This dataset provides mRNA profiling results and information for each gene such as functional annotation, GO terms, transposon class and expression clusters for 12,516 detected genes by means of Phytophthora ramorum NimbleGen expression microarray. Each of columns is explained in the attached worksheet “Readme”. (XLS) [file pone.0034728.s009.xls]

## Sheet: Array
SEQ_ID	desc	TPSI_Avh	GO concat	transposon	transposon class	blastclust	HCE	CV	average expression	cluster	MK79j	MK106	MK548	MK558	MK649a	MK516d	MK649b	HC67_22	HC73_5	Pr35	MK516a	Pr102	Pr16
PR_46887		NULL	NULL	NULL	NULL	NULL	NULL	0.56657	1494.52	A-up	2097.59	2678.38	2618.88	2232.3	1517.08	1473.59	1397.65	2145.18	1770.89	328.025	317.529	104.292	747.35
PR_78874	predicted protein [Nematostella vectensis]	NULL	NULL	NULL	NULL	NULL	NULL	0.578876	1550.38	A-up	2089.23	2375.13	2467.19	2154.46	1553.11	1974.32	1961.96	2088.14	2470.39	211.44	286.38	40.2007	483.031
PR_84544		NULL	NULL	NULL	NULL	NULL	NULL	0.592992	3084.96	A-up	4307.98	4050.97	4550.21	3695.05	3843.67	3497.3	4940.7	4425.62	4998.72	1343.58	302.029	37.8112	110.829
PR_46774		NULL	NULL	NULL	NULL	NULL	NULL	0.597726	1422.49	A-up	2030.08	2452.86	2727.32	2168.95	1730.27	1266.64	1430.14	1789.19	1771.53	199.545	324.087	62.0896	539.63
PR_83077		NULL	NULL	NULL	NULL	NULL	NULL	0.628313	593.86	A-up	895.519	803.285	647.106	582.316	662.463	736.712	893.105	1037.78	1134.7	200.911	44.583	48.6882	33.014
PR_74094		NULL	NULL	NULL	NULL	NULL	NULL	0.636444	304.924	A-up	245.211	236.461	398.24	290.699	678.894	360.129	599.186	458.525	394.615	80.3583	61.717	96.5048	63.4768
PR_82972	ABC transporter family protein [Tetrahymena thermophila SB210]	NULL	GO:0000166_GO:0003674_GO:0003824_GO:0005488_GO:0005524_GO:0016462_GO:0016787_GO:0016817_GO:0016818_GO:0016887_GO:0017076_GO:0017111_GO:0030554_GO:0032553_GO:0032555_GO:0032559	NULL	NULL	NULL	NULL	0.645186	3772.05	A-up	6448.84	4518.7	4757.16	5666	6699.03	1286.72	5525.12	5597.56	5905.24	817.362	752.36	246.953	815.626
PR_78311		NULL	NULL	NULL	NULL	NULL	NULL	0.647086	275.177	A-up	292.799	385.733	427.825	330.497	580.944	121.108	395.357	440.551	395.39	60.2179	41.4356	51.7164	53.7291
PR_79560		NULL	NULL	NULL	NULL	NULL	NULL	0.648924	617.242	A-up	1058.82	745.296	660.755	888.182	1081.9	755.376	929.605	896.683	848.316	68.4701	38.0016	25.4712	27.2741
PR_83023		NULL	NULL	NULL	NULL	NULL	NULL	0.666356	1182.12	A-up	1609.41	1406.85	1354.98	1089.09	1524.01	1000.69	1919.75	2170.29	2565.21	576.756	75.389	30.4999	44.6197
PR_87488		NULL	NULL	NULL	NULL	NULL	NULL	0.670832	830.036	A-up	1184.95	1399.22	1184.41	494.013	625.883	1067.12	1346.9	1207.18	1732.88	407.638	68.0537	30.9783	41.2412
PR_97499	PrAvh_304	PrAvh_304	NULL	NULL	NULL	NULL	NULL	0.671263	308.067	A-up	710.415	143.672	423.149	593.279	334.855	327.389	312.3	478.431	369.269	24.0952	219.734	30.0534	38.2242
PR_86573	bZIP family transcription factor [Phytophthora infestans]	NULL	NULL	NULL	NULL	NULL	NULL	0.674107	466.091	A-up	684.312	786.507	751.023	732.268	649.471	103.482	711.46	733.793	652.118	95.5065	68.4644	43.0653	47.7155
PR_79561		NULL	GO:0000166_GO:0003674_GO:0003824_GO:0004672_GO:0004674_GO:0004713_GO:0005488_GO:0005524_GO:0006464_GO:0006468_GO:0006793_GO:0006796_GO:0008150_GO:0008152_GO:0009987_GO:0016301_GO:0016310_GO:0016740_GO:0016772_GO:0016773_GO:0017076_GO:0019538_GO:0030554_GO:0032553_GO:0032555_GO:0032559_GO:0034960_GO:0043170_GO:0043283_GO:0043412_GO:0043687_GO:0044237_GO:0044238_GO:0044260_GO:0044267	NULL	NULL	NULL	NULL	0.682738	603.136	A-up	1135.19	807.654	862.005	1022.45	867.755	728.871	770.366	642.223	955.623	10.7309	12.09	14.615	11.1929
PR_79907		NULL	NULL	NULL	NULL	NULL	NULL	0.694757	1783.05	A-up	3437.19	2083.27	1924.7	2918.22	1977.1	1131.92	2324.97	2698.43	3826.82	594.87	149.966	30.7231	81.5196
PR_84114		NULL	GO:0000166_GO:0003674_GO:0003824_GO:0004672_GO:0004674_GO:0005488_GO:0005524_GO:0006464_GO:0006468_GO:0006793_GO:0006796_GO:0008150_GO:0008152_GO:0009987_GO:0016301_GO:0016310_GO:0016740_GO:0016772_GO:0016773_GO:0017076_GO:0019538_GO:0030554_GO:0032553_GO:0032555_GO:0032559_GO:0034960_GO:0043170_GO:0043283_GO:0043412_GO:0043687_GO:0044237_GO:0044238_GO:0044260_GO:0044267	NULL	NULL	NULL	NULL	0.694958	6187.49	A-up	9756.7	7134.25	6987.51	7824.83	9379.07	7757.46	9427.88	10707.6	11412.9	11.8482	11.0614	16.6821	9.6124
PR_74346		NULL	NULL	NULL	NULL	NULL	NULL	0.69568	280.59	A-up	429.633	328.559	278.105	106.571	339	268.331	426.443	502.175	699.987	146.688	41.3375	31.0911	49.7471
PR_74645		NULL	GO:0003674_GO:0003824_GO:0016740	NULL	NULL	NULL	NULL	0.695887	4348.95	A-up	5965.14	7589.83	7122.28	9649.66	7402.06	4986.93	5022.02	2690.38	2765.24	2815.4	464.28	32.0619	31.1076
PR_82527	Extradiol ring-cleavage dioxygenase class III protein subunit B [Beijerinckia indica subsp. indica ATCC 9039]	NULL	GO:0003674_GO:0003824_GO:0005488_GO:0005506_GO:0006725_GO:0008150_GO:0008152_GO:0008198_GO:0009055_GO:0009987_GO:0016491_GO:0043167_GO:0043169_GO:0044237_GO:0046872_GO:0046914	NULL	NULL	NULL	NULL	0.702385	828.718	A-up	1420.57	1176.16	1038	1107.9	1527.09	642.875	1542.01	1001.61	1223.88	19.5845	24.7796	24.9326	23.9312
PR_72326		NULL	GO:0003674_GO:0003779_GO:0005215_GO:0005488_GO:0005515_GO:0005575_GO:0005623_GO:0006810_GO:0008092_GO:0008150_GO:0009987_GO:0016020_GO:0016021_GO:0022857_GO:0022891_GO:0022892_GO:0031224_GO:0044425_GO:0044464_GO:0051179_GO:0051234_GO:0055085	NULL	NULL	NULL	NULL	0.708175	6671.31	A-up	14379.5	11504.3	8202.15	12706.6	7578.94	8537.66	7184.83	3167	10178.5	265.513	2167.59	725.335	129.126
PR_80840	CRN-like CRN8 [Phytophthora infestans]	CRN	NULL	NULL	NULL	NULL	NULL	0.717987	3065.54	A-up	4635.5	3560.14	5223.61	4080.28	4159.3	2401.04	5125.94	4483.58	6132.34	10.5576	11.0869	16.7305	11.9012
PR_96514		NULL	NULL	NULL	NULL	NULL	NULL	0.728435	669.462	A-up	1058.63	758.953	626.203	556.043	1279.82	706.65	1159.89	1169.93	1290.78	24.9737	18.2313	28.2206	24.675
PR_87875	CRN-like CRN12 [Phytophthora infestans]	CRN	NULL	NULL	NULL	NULL	NULL	0.73126	2178.36	A-up	3475.19	2527.59	3770.8	3624.04	2809.1	1492.29	2707.13	3428.64	4433.29	11.6826	11.9747	14.4922	12.3863
PR_85416		NULL	GO:0003674_GO:0003779_GO:0005215_GO:0005488_GO:0005515_GO:0005575_GO:0005623_GO:0006810_GO:0008092_GO:0008150_GO:0009987_GO:0016020_GO:0016021_GO:0022857_GO:0022891_GO:0022892_GO:0031224_GO:0044425_GO:0044464_GO:0051179_GO:0051234_GO:0055085	NULL	NULL	NULL	NULL	0.755316	7097.36	A-up	17427.6	12832.7	8827.43	12810.3	6123.36	8553.94	7276.09	3401.4	11738.2	283.924	2091.62	753.501	145.642
PR_74093		NULL	NULL	NULL	NULL	NULL	NULL	0.755316	329.171	A-up	474.649	544.085	507.909	578.107	679.081	30.5403	495.137	463.011	418.318	25.412	14.1606	29.7453	19.0712
PR_86728		NULL	NULL	NULL	NULL	NULL	NULL	0.755433	4976.67	A-up	8845.14	4933.45	6207.34	5652.87	9833.06	2384.47	7868.13	8329.31	9940.96	329.761	225.487	28.3176	118.417
PR_77717		NULL	NULL	NULL	NULL	NULL	NULL	0.762996	4943.19	A-up	9795.79	5627.74	6870.91	8180.99	9535.29	1434.85	6437.91	7967.75	7925.91	229.235	170.039	42.648	42.3878
PR_79234		NULL	NULL	NULL	NULL	NULL	NULL	0.765983	5717.32	A-up	11491.1	6114.75	9535.19	11018.1	8430.98	2233.84	6679.11	9409.65	9124.93	120.459	73.0416	40.775	53.2504
PR_84990		NULL	NULL	NULL	NULL	NULL	NULL	0.769551	384.11	A-up	556.959	391.533	749.742	737.57	692.339	47.1085	442.021	707.356	550.644	39.5431	17.286	26.2073	35.1244
PR_78409		NULL	NULL	NULL	NULL	NULL	NULL	0.769989	391.712	A-up	577.328	340.805	821.515	822.523	572.431	67.875	725.922	516.564	494.277	40.6448	38.4552	27.5451	46.3713
PR_84640	Unknown (protein for MGC:186600) [Xenopus tropicalis]	NULL	GO:0003674_GO:0003676_GO:0005488	NULL	NULL	NULL	NULL	0.770108	1326.73	A-up	2268.46	2386.97	2169.26	2387.53	1770.22	198.378	1830.64	1971.38	2189.1	22.2563	10.781	22.8168	19.7097
PR_84058		NULL	NULL	NULL	NULL	NULL	NULL	0.771809	845.46	A-up	1751.25	1399.35	1262.55	353.054	304.259	1368.94	1622.69	891.275	1597.67	368.236	35.2758	19.6459	16.7911
PR_81440	Unknown (protein for MGC:186600) [Xenopus tropicalis]	NULL	GO:0003674_GO:0003676_GO:0005488	NULL	NULL	NULL	NULL	0.772444	1878.03	A-up	2859.41	3699.46	3330.58	3033.2	2946.33	303.488	2693.94	2564.23	2906.25	25.3525	15.8524	22.563	13.7167
PR_82850		NULL	NULL	NULL	NULL	NULL	NULL	0.772632	160.729	A-up	342.955	197.781	162.007	261.325	310.961	32.4711	159.771	312.636	251.138	14.7643	22.9377	10.8171	9.9103
PR_81601		NULL	NULL	NULL	NULL	NULL	NULL	0.779615	167.321	A-up	346.617	117.294	140.163	284.91	212.36	35.9344	135.963	377.682	369.533	44.6701	47.4509	40.3301	22.2662
PR_75879	CRN-like CRN8 [Phytophthora infestans]	CRN	NULL	NULL	NULL	NULL	NULL	0.782454	1422.72	A-up	2008.76	1482.77	2146.61	2447.98	2024.74	409.971	2446.52	2307.21	3164.28	13.4508	17.259	14.6656	11.1825
PR_75878		NULL	NULL	NULL	NULL	NULL	NULL	0.800342	1674.68	A-up	2624.91	1453.71	2402.07	2828.36	3171.56	288.805	1940.62	3162.93	3618.65	162.642	75.4086	20.1694	20.9908
PR_81613		NULL	NULL	NULL	NULL	NULL	NULL	0.81503	316.728	A-up	619.662	236.237	473.448	516.368	669.96	29.5501	382.375	579.409	554.415	17.9954	12.0505	11.3474	14.6508
PR_84953		NULL	NULL	NULL	NULL	NULL	NULL	0.819114	1927.19	A-up	3397.9	1735.3	2612.66	2394.39	3584.11	170.355	2627.32	4171.51	4042.17	189.318	21.39	26.2478	80.7803
PR_84545		NULL	NULL	NULL	NULL	NULL	NULL	0.820411	124.917	A-up	234.899	257.002	186.157	14.4614	18.8465	225.219	170.071	164.628	272.992	23.6474	16.8585	14.0892	25.046
PR_87721		NULL	NULL	NULL	NULL	NULL	NULL	0.851194	191.098	A-up	437.135	378.283	125.547	445.811	67.5	73.5995	61.4764	318.109	379.044	34.7018	82.8936	32.9928	47.1827
PR_78208		NULL	NULL	NULL	NULL	NULL	NULL	0.864519	5436.43	A-up	9133.67	3673.83	6317.71	5737.59	9832.44	948.741	8966.27	11286.4	14000.7	394.48	281.273	47.5955	52.8227
PR_87061	CRN-like CRN9 [Phytophthora infestans]	CRN	NULL	NULL	NULL	NULL	NULL	0.905227	1343.49	A-up	2256.39	182.857	2125.17	2314.39	2062.98	137.071	2235.92	2306.74	3616.91	31.6508	114.955	42.9054	37.3944
PR_81735		NULL	NULL	NULL	NULL	NULL	NULL	0.912414	1326.66	A-up	1850.48	715.571	1385.75	1219.42	2693.14	182.287	2395.52	3110.3	3445.25	68.7055	47.9552	76.3008	55.8673
PR_85672		NULL	NULL	NULL	NULL	NULL	NULL	0.944319	5907.62	A-up	12750.7	16.9412	9142.75	10265.5	9830.22	16.4452	9720.34	11256.6	13744.1	15.8695	15.4107	14.757	9.4417
PR_72359	CRN-like CRN7 [Phytophthora infestans]	CRN	NULL	NULL	NULL	NULL	NULL	0.963132	5770.78	A-up	11692.5	19.9864	10069.7	11085.9	7958.5	24.86	7799.26	11842.3	14460.3	11.5544	19.892	19.2969	16.2232
PR_79379	bZIP family transcription factor [Phytophthora infestans]	NULL	NULL	NULL	NULL	NULL	NULL	0.979288	90.6281	A-up	179.876	90.0081	28.5775	42.1871	332.318	43.2735	175.931	96.6634	104.213	15.3121	46.31	12.0662	11.4289
PR_78225	bZIP family transcription factor [Phytophthora infestans]	NULL	NULL	NULL	NULL	NULL	NULL	1.35427	320.256	A-up	1068.82	323.159	98.7601	98.363	1399.71	64.0653	718.772	119.865	103	46.3497	57.0972	34.6443	30.715
PR_78642		NULL	GO:0003674_GO:0005488_GO:0005509_GO:0043167_GO:0043169_GO:0046872	NULL	NULL	NULL	NULL	1.09104	94.365	B-up	36.8042	39.4832	21.4159	20.2151	23.2799	46.8705	26.8353	35.0812	30.6169	144.885	204.795	257.389	339.074
PR_82268		NULL	GO:0003674_GO:0003824_GO:0016740_GO:0016746_GO:0016747	NULL	NULL	NULL	NULL	1.14126	127.252	B-up	74.5584	64.5122	23.5829	44.0209	44.9387	52.279	63.3062	56.7323	61.8989	52.5003	526.831	256.915	332.202
PR_73365		NULL	GO:0000166_GO:0003674_GO:0003774_GO:0003777_GO:0003824_GO:0005488_GO:0005524_GO:0005575_GO:0005622_GO:0005623_GO:0005856_GO:0005875_GO:0006810_GO:0007017_GO:0007018_GO:0008150_GO:0009987_GO:0015630_GO:0016462_GO:0016787_GO:0016817_GO:0016818_GO:0017076_GO:0017111_GO:0030554_GO:0030705_GO:0032553_GO:0032555_GO:0032559_GO:0032991_GO:0043226_GO:0043228_GO:0043229_GO:0043232_GO:0043234_GO:0044422_GO:…	NULL	NULL	NULL	NULL	1.18671	91.9276	B-up	41.3699	59.2904	35.0579	40.3316	45.4636	46.934	22.2117	37.3568	38.2911	42.8262	142.17	222.863	420.893
PR_87567	retrotransposon element [Hyaloperonospora parasitica]	TPSI	GO:0003674_GO:0003676_GO:0005488_GO:0008270_GO:0043167_GO:0043169_GO:0046872_GO:0046914	TPSI_2442	TY1_Copia	BCmono	HCoak3	1.20826	194.648	B-up	67.0075	185.185	49.8697	45.7835	80.4523	60.5436	81.7669	86.57	73.2685	568.103	320.534	841.541	69.8049
PR_79763		NULL	NULL	NULL	NULL	NULL	NULL	1.2227	89.2308	B-up	38.5849	31.7761	21.7574	54.5951	45.2456	35.0293	30.9677	38.102	47.8363	33.9083	257.449	402.4	122.349
PR_87657	retrotransposon element [Hyaloperonospora parasitica]	TPSI	GO:0003674_GO:0003676_GO:0005488_GO:0008270_GO:0043167_GO:0043169_GO:0046872_GO:0046914	TPSI_2732	TY1_Copia	BCmono	HCoak3	1.22542	125.837	B-up	49.1514	78.2777	27.3527	58.8353	54.7978	28.0566	52.3043	69.295	74.7426	467.838	128.256	497.534	49.4335
PR_87378		TPSI	GO:0003674_GO:0003676_GO:0005488_GO:0008270_GO:0043167_GO:0043169_GO:0046872_GO:0046914	TPSI_1929	TY1_Copia	BCmono	HCoak3	1.23018	457.253	B-up	133.07	454.897	161.021	179.557	310.075	144.663	180.553	132.096	104.005	587.856	1588.62	1868.55	99.3291
PR_95213		NULL	NULL	NULL	NULL	NULL	NULL	1.23295	1818.88	B-up	813.94	844.699	715.603	665.41	720.201	734.938	442.175	1076.65	1096.94	1685.45	6257	865.874	7726.61
PR_83915		NULL	NULL	NULL	NULL	NULL	NULL	1.26231	915.91	B-up	553.697	308.874	435.572	306.537	305.874	514.543	363.586	294.415	466.632	282.087	872.177	3497.87	3704.96
PR_82740		NULL	NULL	NULL	NULL	NULL	NULL	1.2665	146.852	B-up	70.3488	30.6697	25.5073	57.961	45.916	26.9217	36.1967	37.1339	57.9389	476.291	227.929	630.971	185.295
PR_72538	ORF g	TPSI	NULL	TPSI_2530	TY1_Copia	BC2	HCoak3	1.28738	72.7396	B-up	20.004	71.7039	14.2371	20.9806	22.5705	18.7517	22.3199	22.3648	18.3937	201.84	175.67	320.195	16.583
PR_81490	putative N-acetyltransferase-like protein [Hyaloperonospora parasitica]	NULL	GO:0003674_GO:0003824_GO:0008080_GO:0008150_GO:0008152_GO:0008415_GO:0016407_GO:0016410_GO:0016740_GO:0016746_GO:0016747	NULL	NULL	NULL	NULL	1.34661	309.565	B-up	172.531	175.915	126.777	112.911	88.3164	153.842	136.797	131.321	124.53	221.988	1608.34	150.23	820.854
PR_84361		TPSI	GO:0003674_GO:0003676_GO:0005488_GO:0008270_GO:0043167_GO:0043169_GO:0046872_GO:0046914	TPSI_0277	TY1_Copia	BCmono	HCoak2	1.3657	231.581	B-up	42.6705	229.044	48.8485	88.0444	71.7122	54.8947	94.8491	71.6365	36.3012	1107.83	267.219	771.298	126.209
PR_87069		TPSI	GO:0003674_GO:0003676_GO:0003723_GO:0003824_GO:0003964_GO:0005488_GO:0006139_GO:0006259_GO:0006260_GO:0006278_GO:0008150_GO:0008152_GO:0009058_GO:0009059_GO:0009987_GO:0016740_GO:0016772_GO:0016779_GO:0034061_GO:0034645_GO:0034960_GO:0034961_GO:0043170_GO:0043283_GO:0043284_GO:0044237_GO:0044238_GO:0044249_GO:0044260	TPSI_1190	gypsy	BCmono	HCoak3	1.3713	13634.5	B-up	2757.36	3495.97	4137.13	17.6849	13.0027	5004.92	3474.58	69.6048	28.7352	39833.9	43498.8	54807.7	20109.4
PR_97435	PrAvh_240	PrAvh_240	NULL	NULL	NULL	NULL	NULL	1.37954	75.007	B-up	37.782	24.7829	20.491	31.4762	31.0085	32.2856	29.2066	30.3362	35.6478	24.6032	356.015	272.11	49.3457
PR_97457	PrAvh_262	PrAvh_262	NULL	NULL	NULL	NULL	NULL	1.38169	94.3617	B-up	42.0907	40.2626	28.2323	33.9124	26.5257	41.6546	32.3041	30.952	49.1982	33.7988	430.309	364.572	72.8893
PR_94627	predicted protein [Nematostella vectensis]	NULL	GO:0000166_GO:0003674_GO:0003774_GO:0003777_GO:0003824_GO:0005488_GO:0005524_GO:0005575_GO:0005622_GO:0005623_GO:0005856_GO:0005875_GO:0006810_GO:0007017_GO:0007018_GO:0008150_GO:0009987_GO:0015630_GO:0016462_GO:0016787_GO:0016817_GO:0016818_GO:0017076_GO:0017111_GO:0030554_GO:0030705_GO:0032553_GO:0032555_GO:0032559_GO:0032991_GO:0043226_GO:0043228_GO:0043229_GO:0043232_GO:0043234_GO:0044422_GO:…	NULL	NULL	NULL	NULL	1.4029	217.485	B-up	93.4994	61.1536	75.5205	124.938	82.4702	111.085	36.1094	92.7061	46.3191	57.1406	200.37	842.843	1003.15
PR_86567	reverse transcriptase [Picea glauca]	TPSI	NULL	TPSI_1350	TY1_Copia	BCmono	HCoak3	1.40819	153.247	B-up	49.0586	96.714	37.9443	69.4164	126.025	31.7638	31.6382	47.8949	64.5225	201.919	375.73	827.884	31.7027
PR_87511	Retrovirus-related Pol polyprotein from transposon TNT 1-94 [Includes: Protease ; Reverse transcriptase ; Endonuclease]	TPSI	GO:0003674_GO:0003676_GO:0003677_GO:0005488_GO:0006139_GO:0006259_GO:0008150_GO:0008152_GO:0009987_GO:0015074_GO:0034960_GO:0043170_GO:0043283_GO:0044237_GO:0044238_GO:0044260	TPSI_2302	TY1_Copia	BCmono	HCoak2	1.42566	135.601	B-up	48.3019	72.6298	59.8909	64.3094	47.7234	35.7949	41.9174	65.7308	36.4605	688.888	90.7859	461.993	48.3843
PR_78076		NULL	NULL	NULL	NULL	NULL	NULL	1.42735	407.58	B-up	183.845	134.798	155.46	94.0735	129.934	124.706	142.092	208.035	304.829	122.407	2005.56	207.843	1484.96
PR_85568		TPSI	GO:0003674_GO:0003676_GO:0003677_GO:0005488_GO:0006139_GO:0006259_GO:0008150_GO:0008152_GO:0009987_GO:0015074_GO:0034960_GO:0043170_GO:0043283_GO:0044237_GO:0044238_GO:0044260	TPSI_2743	TY1_Copia	BCmono	HCoak3	1.42757	198.325	B-up	65.2669	150.707	42.8952	53.9922	73.4529	40.6115	41.8024	68.807	47.4258	829	207.209	877.102	79.9491
PR_87167	Gag and Pol [Zea mays]	TPSI	NULL	TPSI_1350	TY1_Copia	BCmono	HCoak3	1.42884	106.729	B-up	52.6791	95.2034	29.3452	63.7421	47.7289	22.25	33.0985	31.3457	36.3118	118.371	217.229	604.133	36.0364
PR_87594		TPSI	NULL	TPSI_2538	TY1_Copia	BCduo	HCoak2	1.43864	91.6729	B-up	33.711	92.526	25.1799	33.6539	32.3597	33.0816	26.2275	23.4442	31.0145	521.352	97.512	188.075	53.6107
PR_80578	predicted protein [Monosiga brevicollis MX1]	NULL	GO:0003674_GO:0005215_GO:0005488_GO:0005515_GO:0005575_GO:0005623_GO:0006810_GO:0008150_GO:0009987_GO:0016020_GO:0016021_GO:0016192_GO:0031224_GO:0044425_GO:0044464_GO:0051179_GO:0051234	NULL	NULL	NULL	NULL	1.44029	376.958	B-up	170.196	147.444	88.7382	197.461	161.015	193.048	116.706	114.131	122.035	139.177	431.225	2106.99	912.291
PR_87261	retrotransposon element [Hyaloperonospora parasitica]	TPSI	GO:0003674_GO:0003676_GO:0005488_GO:0008270_GO:0043167_GO:0043169_GO:0046872_GO:0046914	TPSI_4348	TY1_Copia	BCduo	HCoak2	1.4441	188.521	B-up	62.0428	170.112	48.05	57.2954	89.6236	46.1615	48.153	63.2427	43.4363	1014.02	163.692	552.464	92.4848
PR_78074		TPSI	GO:0000785_GO:0003674_GO:0003676_GO:0003677_GO:0003682_GO:0005488_GO:0005575_GO:0005622_GO:0005623_GO:0005634_GO:0005694_GO:0006139_GO:0006259_GO:0006325_GO:0006333_GO:0006996_GO:0008150_GO:0008152_GO:0009987_GO:0015074_GO:0016043_GO:0034960_GO:0043170_GO:0043226_GO:0043227_GO:0043228_GO:0043229_GO:0043231_GO:0043232_GO:0043283_GO:0044237_GO:0044238_GO:0044260_GO:0044422_GO:0044424_GO:0044427_GO:…	TPSI_3368	gypsy	BCmono	HCoak1	1.45582	157.574	B-up	15.5139	20.0474	14.0076	19.6171	16.9064	15.5626	17.9182	23.1576	25.4176	395.276	749.1	455.846	280.091
PR_87189		TPSI	NULL	TPSI_1230	TY1_Copia	BCmono	HCoak2	1.45711	74.0285	B-up	16.0888	54.5423	20.6851	15.1496	34.3493	31.0038	33.2458	26.4588	21.1982	421.726	59.1689	172.252	56.5018
PR_78469	cGMP-stimulated cGMP phosphodiesterase [Dictyostelium discoideum AX4]	NULL	GO:0003674_GO:0003735_GO:0003824_GO:0005198_GO:0005575_GO:0005622_GO:0005623_GO:0005737_GO:0005840_GO:0006412_GO:0008150_GO:0008152_GO:0009058_GO:0009059_GO:0009987_GO:0010467_GO:0016787_GO:0019538_GO:0030529_GO:0032991_GO:0034645_GO:0034960_GO:0034961_GO:0043170_GO:0043226_GO:0043228_GO:0043229_GO:0043232_GO:0043283_GO:0043284_GO:0044237_GO:0044238_GO:0044249_GO:0044260_GO:0044267_GO:0044424_GO:…	NULL	NULL	NULL	NULL	1.4593	85.9221	B-up	41.5697	22.633	22.6959	30.5208	52.663	42.05	37.3167	36.7756	47.7517	71.4123	165.034	43.7169	502.848
PR_87458		TPSI	GO:0003674_GO:0003676_GO:0005488_GO:0008270_GO:0043167_GO:0043169_GO:0046872_GO:0046914	TPSI_1989	TY1_Copia	BCmono	HCoak3	1.46502	157.367	B-up	65.7397	111.508	63.7814	46.6002	93.6022	47.8809	75.427	39.3121	57.5058	93.0417	429.465	879.441	42.4665
PR_83397	predicted protein [Physcomitrella patens subsp. patens]	NULL	GO:0003674_GO:0005215_GO:0005575_GO:0005623_GO:0006810_GO:0006811_GO:0006812_GO:0008150_GO:0008324_GO:0015075_GO:0016020_GO:0022857_GO:0022891_GO:0022892_GO:0044464_GO:0051179_GO:0051234	NULL	NULL	NULL	NULL	1.46938	534.636	B-up	154.388	222.599	159.264	184.821	279.13	197.33	248.652	286.726	168.658	292.269	1897.84	98.239	2760.36
PR_86700		TPSI	NULL	TPSI_0166	TY1_Copia	BCduo	HCoak3	1.47652	107.965	B-up	35.7199	65.3062	34.267	45.7754	73.3433	31.144	40.0042	50.2904	49.1352	54.1788	273.369	617.58	33.4288
PR_54705	PREDICTED: similar to Copia protein (Gag-int-pol protein) [Tribolium castaneum]	TPSI	NULL	TPSI_2881	TY1_Copia	BCmono	HCoak3	1.48042	158.582	B-up	28.7174	166.04	31.1645	53.2305	124.132	24.6716	47.4309	32.5108	36.0368	275.76	305.3	905.768	30.8021
PR_87658	polyprotein [Anopheles gambiae]	TPSI	GO:0003674_GO:0003676_GO:0003677_GO:0005488_GO:0006139_GO:0006259_GO:0008150_GO:0008152_GO:0009987_GO:0015074_GO:0034960_GO:0043170_GO:0043283_GO:0044237_GO:0044238_GO:0044260	TPSI_2739	TY1_Copia	BCmono	HCoak3	1.48072	93.1263	B-up	35.1476	85.9214	28.9745	56.4699	44.6368	25.6548	26.4369	29.4291	27.6526	101.729	173.378	548.819	26.393
PR_86635		TPSI	NULL	TPSI_4552	TY1_Copia	BCmono	HCoak2	1.48293	206.879	B-up	33.2042	273.942	54.0575	60.982	67.8331	60.1643	70.0768	59.7737	59.0119	1121.55	123.294	631.14	74.3955
PR_72497	pol polyprotein [Citrus x paradisi]	TPSI	NULL	TPSI_1347	TY1_Copia	BC8	HCoak3	1.48519	342.518	B-up	77.7772	463.48	126.163	116.452	151.458	110.079	83.289	83.9641	69.4647	578.008	532.965	1990.52	69.1176
PR_87375	probable retroelement pol polyprotein [imported] - Arabidopsis thaliana	TPSI	GO:0003674_GO:0003676_GO:0005488_GO:0008270_GO:0043167_GO:0043169_GO:0046872_GO:0046914	TPSI_1916	TY1_Copia	BCmono	HCoak3	1.48573	237.055	B-up	89.2515	95.1551	73.3525	177.818	160.926	67.0917	112.203	80.6165	78.2779	166.635	510.342	1392.57	77.4763
PR_87041		TPSI	GO:0003674_GO:0003676_GO:0003723_GO:0003824_GO:0003964_GO:0004175_GO:0004190_GO:0005488_GO:0006139_GO:0006259_GO:0006260_GO:0006278_GO:0006508_GO:0008150_GO:0008152_GO:0008233_GO:0009058_GO:0009059_GO:0009987_GO:0016740_GO:0016772_GO:0016779_GO:0016787_GO:0019538_GO:0034061_GO:0034645_GO:0034960_GO:0034961_GO:0043170_GO:0043283_GO:0043284_GO:0044237_GO:0044238_GO:0044249_GO:0044260_GO:0044267_GO:…	TPSI_1055	gypsy	BCmono	HCoak1	1.49305	92.0037	B-up	27.9811	34.3516	47.0013	16.4922	18.5973	28.7808	31.8369	27.7764	34.2033	44.2036	505.697	96.7815	282.346
PR_87570	copia-like retrotransposable element [Arabidopsis thaliana]	TPSI	GO:0003674_GO:0003676_GO:0003677_GO:0005488_GO:0006139_GO:0006259_GO:0008150_GO:0008152_GO:0009987_GO:0015074_GO:0034960_GO:0043170_GO:0043283_GO:0044237_GO:0044238_GO:0044260	TPSI_2454	TY1_Copia	BCmono	HCoak3	1.50049	133.229	B-up	54.5686	99.3232	30.9646	48.7622	90.8447	33.0955	50.6636	47.4165	43.8104	106.648	321.449	776.223	28.2134
PR_49580		TPSI	NULL	TPSI_4443	TY1_Copia	BCduo	HCoak3	1.50126	2052.5	B-up	11.4438	14.6441	17.5772	12.2031	10.3705	14.141	10.8366	9.9037	9.9971	5720.3	6797.82	7534.62	6518.68
PR_87459		TPSI	GO:0003674_GO:0003676_GO:0005488_GO:0008270_GO:0043167_GO:0043169_GO:0046872_GO:0046914	TPSI_2165	TY1_Copia	BCmono	HCoak2	1.5013	101.279	B-up	28.6171	64.0588	21.1303	33.5938	40.3375	21.2263	23.3416	24.9278	23.0311	553.296	134.929	313.138	34.9932
PR_87818	retrotransposon element [Hyaloperonospora parasitica]	TPSI	GO:0003674_GO:0003676_GO:0005488_GO:0008270_GO:0043167_GO:0043169_GO:0046872_GO:0046914	TPSI_3153	TY1_Copia	BCmono	HCoak2	1.5043	203.714	B-up	50.67	161.57	42.8364	51.2532	67.7825	56.6294	39.0059	94.2365	50.4545	1164.83	200.76	541.518	126.734
PR_87241		NULL	NULL	NULL	NULL	NULL	NULL	1.51253	130.278	B-up	82.4034	44.324	51.6982	38.6407	39.4057	58.6652	38.0535	24.2429	28.0036	49.3351	675.544	490.483	72.8105
PR_87290	copia-like retrotransposable element [Arabidopsis thaliana]	TPSI	GO:0003674_GO:0003676_GO:0003677_GO:0005488_GO:0006139_GO:0006259_GO:0008150_GO:0008152_GO:0009987_GO:0015074_GO:0034960_GO:0043170_GO:0043283_GO:0044237_GO:0044238_GO:0044260	TPSI_1664	TY1_Copia	BCmono	HCoak3	1.51511	136.524	B-up	32.729	81.8054	42.4055	74.897	83.2412	38.3716	62.157	49.0681	70.4073	105.041	272.854	822.619	39.2125
PR_87716	copia-like retrotransposable element [Arabidopsis thaliana]	TPSI	GO:0003674_GO:0003676_GO:0003677_GO:0005488_GO:0006139_GO:0006259_GO:0008150_GO:0008152_GO:0009987_GO:0015074_GO:0034960_GO:0043170_GO:0043283_GO:0044237_GO:0044238_GO:0044260	TPSI_2902	TY1_Copia	BCmono	HCoak3	1.51547	104.242	B-up	21.4244	84.4367	16.6335	23.0697	32.2765	11.7428	18.1697	31.8335	18.2869	255.112	264.351	565.082	12.7325
PR_87419		TPSI	GO:0003674_GO:0003676_GO:0005488_GO:0008270_GO:0043167_GO:0043169_GO:0046872_GO:0046914	TPSI_5825	TY1_Copia	BC6	HCoak3	1.51811	129.817	B-up	40.8405	85.0865	36.8489	68.8922	75.8927	43.3869	64.3364	27.5096	29.7047	97.0132	320.248	763.139	34.7216
PR_86661		NULL	GO:0000166_GO:0003674_GO:0003824_GO:0005215_GO:0005488_GO:0005524_GO:0005575_GO:0005623_GO:0006810_GO:0008150_GO:0008270_GO:0015399_GO:0015405_GO:0016020_GO:0016021_GO:0016462_GO:0016491_GO:0016787_GO:0016817_GO:0016818_GO:0016820_GO:0016887_GO:0017076_GO:0017111_GO:0022804_GO:0022857_GO:0030554_GO:0031224_GO:0032553_GO:0032555_GO:0032559_GO:0042623_GO:0042626_GO:0043167_GO:0043169_GO:0043492_GO:…	NULL	NULL	NULL	NULL	1.51929	967.68	B-up	186.109	437.566	347.33	296.833	327.854	485.078	595.167	690.049	434.883	466.815	5574.19	58.0461	2679.92
PR_86870	polyprotein [Anopheles gambiae]	TPSI	GO:0003674_GO:0003676_GO:0003677_GO:0005488_GO:0006139_GO:0006259_GO:0008150_GO:0008152_GO:0009987_GO:0015074_GO:0034960_GO:0043170_GO:0043283_GO:0044237_GO:0044238_GO:0044260	TPSI_1364	TY1_Copia	BCmono	HCoak2	1.5243	435.935	B-up	82.8092	420.194	97.4948	228.159	151.516	113.352	108.304	179.443	72.9327	2532.02	355.397	1144.83	180.705
PR_80452	predicted protein [Laccaria bicolor S238N-H82]	NULL	GO:0003674_GO:0003676_GO:0005488	NULL	NULL	NULL	NULL	1.52663	1831.35	B-up	597.913	638.447	675.917	707.895	473.7	993.548	456.042	404.192	423.839	790.389	8584.81	900.373	8160.51
PR_84658		NULL	GO:0003674_GO:0003676_GO:0003677_GO:0003700_GO:0005488_GO:0006355_GO:0008150_GO:0009889_GO:0010468_GO:0010556_GO:0019219_GO:0019222_GO:0030528_GO:0031323_GO:0031326_GO:0043565_GO:0045449_GO:0050789_GO:0050794_GO:0051252_GO:0060255_GO:0065007_GO:0080090	NULL	NULL	NULL	NULL	1.53291	130.43	B-up	52.4543	52.6733	53.6364	53.4422	40.9814	35.9429	38.7412	42.749	26.9222	41.8349	689.905	77.6363	488.677
PR_71621	cell cycle protein cdc14 [Phytophthora infestans]	NULL	GO:0003674_GO:0003824_GO:0004721_GO:0004725_GO:0006464_GO:0006470_GO:0006793_GO:0006796_GO:0008138_GO:0008150_GO:0008152_GO:0009987_GO:0016311_GO:0016787_GO:0016788_GO:0016791_GO:0019538_GO:0034960_GO:0042578_GO:0043170_GO:0043283_GO:0043412_GO:0043687_GO:0044237_GO:0044238_GO:0044260_GO:0044267	NULL	NULL	NULL	NULL	1.5343	907.621	B-up	361.613	326.602	213.557	372.5	536.696	420.005	369.899	495.988	552.896	639.771	896.04	933.701	5679.81
PR_71174	ATP-binding cassette transporter, subfamily B, member 14, group MDR/PGP protein PpABCB14 [Physcomitrella patens subsp. patens]	NULL	GO:0000166_GO:0003674_GO:0003824_GO:0005215_GO:0005488_GO:0005524_GO:0005575_GO:0005623_GO:0006810_GO:0008150_GO:0015399_GO:0015405_GO:0016020_GO:0016021_GO:0016462_GO:0016787_GO:0016817_GO:0016818_GO:0016820_GO:0016887_GO:0017076_GO:0017111_GO:0022804_GO:0022857_GO:0030554_GO:0031224_GO:0032553_GO:0032555_GO:0032559_GO:0042623_GO:0042626_GO:0043492_GO:0044425_GO:0044464_GO:0051179_GO:0051234	NULL	NULL	NULL	NULL	1.54092	1344.59	B-up	353.398	483.53	459.726	367.666	525.94	377.583	344.005	753.427	512.689	591.267	7217.95	543.556	4948.98
PR_84172		NULL	GO:0003674_GO:0003824_GO:0004553_GO:0005488_GO:0005515_GO:0008150_GO:0008152_GO:0009056_GO:0016787_GO:0016798_GO:0016998_GO:0031072_GO:0033903_GO:0043170_GO:0044036	NULL	NULL	NULL	NULL	1.55638	203.488	B-up	47.0109	70.5876	111.642	50.6964	80.8548	163.843	87.0279	84.3431	92.1965	166.855	63.3064	1265.18	361.808
PR_86823	putative gag-pol polyprotein [Oryza sativa (japonica cultivar-group)]	TPSI	NULL	TPSI_0659	TY1_Copia	BCmono	HCoak3	1.56006	140.414	B-up	39.3743	86.2785	75.4273	42.8921	92.184	85.7088	38.9001	25.7506	43.0255	160.427	204.371	879.519	51.5195
PR_39792		TPSI	NULL	TPSI_0241	TY1_Copia	BCduo	HCoak3	1.56075	2074.15	B-up	13.4155	14.1848	12.0486	10.1155	16.3486	15.6576	11.5522	13.2605	11.8883	5958.43	4666.87	6819.34	9400.78
PR_87739	copia-like retrotransposable element [Arabidopsis thaliana]	TPSI	GO:0003674_GO:0003676_GO:0003677_GO:0005488_GO:0006139_GO:0006259_GO:0008150_GO:0008152_GO:0009987_GO:0015074_GO:0034960_GO:0043170_GO:0043283_GO:0044237_GO:0044238_GO:0044260	TPSI_2983	TY1_Copia	BCmono	HCoak3	1.56337	199.912	B-up	63.5037	176.768	44.7199	74.1809	107.354	59.1809	62.9471	58.1581	48.076	327.992	270.478	1239.69	65.8085
PR_72543	Gag and Pol [Zea mays]	TPSI	NULL	TPSI_2695	TY1_Copia	BCmono	HCoak3	1.56685	155.747	B-up	68.2808	100.514	60.8013	86.0584	78.0822	52.4227	46.747	51.8824	26.9541	185.002	262.09	972.186	33.6905
PR_79634		NULL	NULL	NULL	NULL	NULL	NULL	1.56737	68.0361	B-up	39.9694	23.9175	28.1168	25.0962	16.7308	19.4504	30.497	20.3913	15.3104	23.5989	43.6432	196.243	401.505
PR_73618		NULL	NULL	NULL	NULL	NULL	NULL	1.56952	70.9169	B-up	17.9471	27.668	29.1616	19.3692	23.7303	27.8139	18.1033	25.5842	29.4897	281.252	375.153	21.9353	24.7121
PR_87304		TPSI	NULL	TPSI_3152	TY1_Copia	BCduo	HCoak2	1.57253	150.304	B-up	47.1537	111.833	16.9073	41.5074	43.3605	25.8211	63.9355	36.3791	31.7553	867.825	129.063	468.596	69.8216
PR_86605		NULL	NULL	NULL	NULL	NULL	NULL	1.57659	288.143	B-up	42.8302	23.4341	19.8353	18.8701	23.7003	20.7434	25.7356	29.5232	23.4266	837.654	1556.24	540.427	583.44
PR_77789		NULL	NULL	NULL	NULL	NULL	NULL	1.57698	661.963	B-up	467.043	222.455	217.661	227.827	292.466	263.377	239.284	188.849	310.735	423.171	4173.35	1182.51	396.784
PR_71962	peroxidase-like protein [Phytophthora infestans]	NULL	GO:0003674_GO:0003824_GO:0004601_GO:0016209_GO:0016491_GO:0016684	NULL	NULL	NULL	NULL	1.57759	1078.62	B-up	404.903	256.011	327.06	287.629	280.796	562.687	455.3	391.566	549.052	273.627	5783.23	241.844	4208.32
PR_75732	Os04g0560100 [Oryza sativa (japonica cultivar-group)]	NULL	GO:0003674_GO:0003824_GO:0004497_GO:0005488_GO:0005506_GO:0009055_GO:0016491_GO:0020037_GO:0043167_GO:0043169_GO:0046872_GO:0046906_GO:0046914	NULL	NULL	NULL	NULL	1.58061	147.594	B-up	41.091	59.9613	86.1446	62.0384	79.2663	43.5433	76.4822	54.7006	49.9524	75.4398	29.4211	907.301	353.381
PR_82868	predicted protein [Chlamydomonas reinhardtii]	NULL	NULL	NULL	NULL	NULL	NULL	1.58064	816.021	B-up	124.597	83.2711	114.457	150.94	175.867	249.865	239.149	347.88	264.201	412.745	4106.78	858.288	3480.22
PR_74760		NULL	NULL	NULL	NULL	NULL	NULL	1.58184	81.3886	B-up	24.9988	20.5095	32.1457	28.9307	24.053	35.0672	26.0912	26.7621	21.601	25.504	26.3544	394.236	371.798
PR_87170	retrotransposon element [Hyaloperonospora parasitica]	TPSI	GO:0003674_GO:0003676_GO:0005488_GO:0008270_GO:0043167_GO:0043169_GO:0046872_GO:0046914	TPSI_1549	TY1_Copia	BC15	HCoak2	1.58973	309.629	B-up	55.2752	258.218	38.6449	58.3427	93.073	75.4506	71.2861	100.341	80.8867	1808.13	326.939	946.924	111.663
PR_77355		TPSI	GO:0003674_GO:0003676_GO:0005488_GO:0008270_GO:0043167_GO:0043169_GO:0046872_GO:0046914	TPSI_2807	TY1_Copia	BCmono	HCoak2	1.59053	67.5465	B-up	22.4973	66.1485	18.3068	26.4657	30.3319	21.0729	20.9223	21.5383	17.2519	430.94	48.0458	98.681	55.9013
PR_87291	copia-like retrotransposable element [Arabidopsis thaliana]	TPSI	GO:0003674_GO:0003676_GO:0003677_GO:0005488_GO:0006139_GO:0006259_GO:0008150_GO:0008152_GO:0009987_GO:0015074_GO:0034960_GO:0043170_GO:0043283_GO:0044237_GO:0044238_GO:0044260	TPSI_1667	TY1_Copia	BC9	HCoak3	1.59116	197.388	B-up	69.7314	89.5517	57.239	80.3398	117.428	74.4143	66.776	58.4793	48.8525	164.9	459.37	1222.82	56.1361
PR_80170		NULL	NULL	NULL	NULL	NULL	NULL	1.59194	323.269	B-up	26.4935	24.24	27.9439	18.2141	26.7021	23.6967	27.979	30.0001	30.788	964.334	1757.83	645.727	598.545
PR_87462	copia-type polyprotein, putative [Arabidopsis thaliana]	TPSI	NULL	TPSI_2170	TY1_Copia	BCmono	HCoak3	1.59653	197.548	B-up	60.7287	221.189	42.335	70.4267	82.0257	39.7343	52.9666	51.4216	39.9607	334.897	292.705	1235.29	44.4452
PR_86487	putative gag-pol polyprotein [Oryza sativa]	TPSI	GO:0003674_GO:0003676_GO:0003677_GO:0005488_GO:0006139_GO:0006259_GO:0008150_GO:0008152_GO:0009987_GO:0015074_GO:0034960_GO:0043170_GO:0043283_GO:0044237_GO:0044238_GO:0044260	TPSI_5442	TY1_Copia	BC4	HCoak3	1.59697	124.003	B-up	26.5724	61.6465	32.7535	56.8952	61.4785	35.4082	35.5996	38.1121	40.9357	121.232	314.223	759.78	27.3969
PR_43742	putative gag-pol polyprotein [Oryza sativa (japonica cultivar-group)]	TPSI	NULL	TPSI_2022	TY1_Copia	BC7	HCoak3	1.60195	207.844	B-up	60.447	187.936	72.8854	80.6737	119.632	68.2904	67.1616	57.7341	46.5475	272.958	286.349	1328.02	53.3329
PR_87070		TPSI	NULL	TPSI_1190	gypsy	BCmono	HCoak3	1.60901	9227.42	B-up	74.5371	75.6305	55.5509	21.2793	26.3745	879.466	54.7682	61.458	37.3441	41400.4	26696.7	36823.4	13749.6
PR_87520		TPSI	GO:0003674_GO:0003676_GO:0005488_GO:0008270_GO:0043167_GO:0043169_GO:0046872_GO:0046914	TPSI_1735	TY1_Copia	BCduo	HCoak3	1.61007	96.8385	B-up	37.4211	31.1498	24.8807	33.9004	66.4719	31.7755	40.2634	32.9451	72.5511	48.4236	187.836	617.782	33.4991
PR_43687	putative gag-pol polyprotein [Oryza sativa (japonica cultivar-group)]	TPSI	NULL	TPSI_1990	TY1_Copia	BC7	HCoak3	1.61774	154.932	B-up	59.0455	144.062	29.3213	41.6941	58.2945	34.7105	50.4164	13.1932	38.9708	189.607	333.976	971.123	49.7025
PR_45726	putative gag-pol polyprotein [Oryza sativa (japonica cultivar-group)]	TPSI	NULL	TPSI_2975	TY1_Copia	BC7	HCoak3	1.62496	189.406	B-up	55.3346	153.285	30.8381	102.185	86.4239	37.1384	30.5265	49.3974	50.6797	248.323	394.034	1194.69	29.4236
PR_87350	reverse transcriptase [Picea glauca]	TPSI	NULL	TPSI_1796	TY1_Copia	BCmono	HCoak3	1.62672	212.998	B-up	50.6589	292.762	67.9155	79.7857	103.666	50.3836	51.7217	45.888	53.3239	322.929	223.098	1368.52	58.3137
PR_87396	copia-like retrotransposable element [Arabidopsis thaliana]	TPSI	GO:0003674_GO:0003676_GO:0003677_GO:0005488_GO:0006139_GO:0006259_GO:0008150_GO:0008152_GO:0009987_GO:0015074_GO:0034960_GO:0043170_GO:0043283_GO:0044237_GO:0044238_GO:0044260	TPSI_1948	TY1_Copia	BCmono	HCoak3	1.62886	187.753	B-up	87.2341	114.746	40.6839	88.2005	116.28	50.6682	70.1362	49.6051	57.3276	144.729	371.971	1206.67	42.5439
PR_41504	predicted protein [Nematostella vectensis]	NULL	GO:0000166_GO:0003674_GO:0005488_GO:0005525_GO:0005575_GO:0005622_GO:0005623_GO:0006810_GO:0006886_GO:0007154_GO:0007165_GO:0007242_GO:0007264_GO:0008104_GO:0008150_GO:0009987_GO:0015031_GO:0017076_GO:0019001_GO:0032553_GO:0032555_GO:0032561_GO:0033036_GO:0034613_GO:0044464_GO:0045184_GO:0046907_GO:0050789_GO:0050794_GO:0051179_GO:0051234_GO:0051641_GO:0051649_GO:0065007	NULL	NULL	NULL	NULL	1.63658	155.329	B-up	41.7801	33.5215	36.23	20.0366	44.0973	94.343	39.9674	72.1357	70.9728	105.259	191.108	265.7	1004.13
PR_87609	probable retroelement pol polyprotein [imported] - Arabidopsis thaliana	TPSI	GO:0003674_GO:0003676_GO:0003677_GO:0005488_GO:0006139_GO:0006259_GO:0008150_GO:0008152_GO:0009987_GO:0015074_GO:0034960_GO:0043170_GO:0043283_GO:0044237_GO:0044238_GO:0044260	TPSI_2573	TY1_Copia	BC4	HCoak3	1.64032	229.011	B-up	66.0882	119.296	127.707	116.502	179.314	95.3831	72.7558	62.7321	41.3606	133.095	427.824	1487.48	47.6079
PR_43622	ORF g	TPSI	NULL	TPSI_1927	TY1_Copia	BC2	HCoak3	1.64201	372.081	B-up	98.0275	329.055	58.8004	114.194	156.351	41.7898	61.3518	50.1228	54.2586	675.001	819.214	2313.33	65.5541
PR_87645	retrotransposon protein, putative, unclassified [Oryza sativa (japonica cultivar-group)]	TPSI	NULL	TPSI_2711	TY1_Copia	BCmono	HCoak2	1.64302	375.307	B-up	51.3537	549.182	47.665	102.871	75.7418	64.8466	73.2138	153.677	55.7637	2355.58	220.853	865.067	263.178
PR_87854	putative gag-pol polyprotein [Oryza sativa (japonica cultivar-group)]	TPSI	NULL	TPSI_3202	TY1_Copia	BCmono	HCoak3	1.64449	198.983	B-up	33.1277	194.921	52.2222	110.243	102.791	44.1559	67.2798	40.5748	44.5324	225.414	328.934	1292.5	50.08
PR_40258	PREDICTED: similar to Poly [ADP-ribose] polymerase 1 (PARP-1) (ADPRT) (NAD(+) ADP-ribosyltransferase 1) (Poly[ADP-ribose] synthetase 1) [Apis mellifera]	NULL	GO:0003674_GO:0003824_GO:0003950_GO:0005575_GO:0005622_GO:0005623_GO:0005634_GO:0006464_GO:0006471_GO:0008150_GO:0008152_GO:0009987_GO:0016740_GO:0016757_GO:0016763_GO:0019538_GO:0034960_GO:0043170_GO:0043226_GO:0043227_GO:0043229_GO:0043231_GO:0043283_GO:0043412_GO:0043687_GO:0044237_GO:0044238_GO:0044260_GO:0044267_GO:0044424_GO:0044464	NULL	NULL	NULL	NULL	1.64611	4016.43	B-up	2852.38	3118.5	851.599	918.905	704.911	1100.29	637.212	986.842	1052.23	1601.58	25354.5	3055.31	9979.38
PR_87360	putative gag-pol polyprotein [Oryza sativa (japonica cultivar-group)]	TPSI	GO:0003674_GO:0003676_GO:0003677_GO:0005488_GO:0006139_GO:0006259_GO:0008150_GO:0008152_GO:0009987_GO:0015074_GO:0034960_GO:0043170_GO:0043283_GO:0044237_GO:0044238_GO:0044260	TPSI_1826	TY1_Copia	BCmono	HCoak2	1.64738	319.022	B-up	69.1763	453.63	78.45	143.284	98.5635	66.7972	71.0656	117.157	43.252	2027.68	141.707	701.271	135.258
PR_87313	copia-like retrotransposable element [Arabidopsis thaliana]	TPSI	GO:0003674_GO:0003676_GO:0003677_GO:0005488_GO:0006139_GO:0006259_GO:0008150_GO:0008152_GO:0009987_GO:0015074_GO:0034960_GO:0043170_GO:0043283_GO:0044237_GO:0044238_GO:0044260	TPSI_1698	TY1_Copia	BCmono	HCoak3	1.64857	173.418	B-up	59.7568	117.607	59.4295	101.023	93.1855	52.892	67.044	67.1249	52.3904	118.016	273.623	1143.66	48.6755
PR_87135	Retrovirus-related Pol polyprotein from transposon TNT 1-94 [Includes: Protease ; Reverse transcriptase ; Endonuclease]	TPSI	GO:0003674_GO:0003676_GO:0003677_GO:0005488_GO:0006139_GO:0006259_GO:0008150_GO:0008152_GO:0008270_GO:0009987_GO:0015074_GO:0034960_GO:0043167_GO:0043169_GO:0043170_GO:0043283_GO:0044237_GO:0044238_GO:0044260_GO:0046872_GO:0046914	TPSI_1475	TY1_Copia	BCmono	HCoak3	1.64953	126.202	B-up	76.6033	70.5971	27.8514	85.2696	77.3251	34.3902	49.9892	37.772	18.146	72.3005	236.17	823.504	30.7021
PR_87271	retrotransposon protein, putative, Ty1-copia subclass [Oryza sativa (japonica cultivar-group)]	TPSI	GO:0003674_GO:0003676_GO:0003677_GO:0005488_GO:0006139_GO:0006259_GO:0008150_GO:0008152_GO:0009987_GO:0015074_GO:0034960_GO:0043170_GO:0043283_GO:0044237_GO:0044238_GO:0044260	TPSI_1601	TY1_Copia	BCmono	HCoak3	1.65185	175.892	B-up	43.7518	151.073	67.8696	66.9767	67.6427	37.7602	35.1587	28.0885	29.3641	275.467	318.261	1130.73	34.4534
PR_87687	copia-type polyprotein, putative [Arabidopsis thaliana]	TPSI	GO:0003674_GO:0003676_GO:0005488_GO:0008270_GO:0043167_GO:0043169_GO:0046872_GO:0046914	TPSI_2802	TY1_Copia	BCmono	HCoak3	1.65251	169.016	B-up	72.9771	132.282	46.8487	82.9721	72.8379	27.1725	66.3736	63.21	54.3145	239.157	201.189	1112.59	25.2766
PR_41848	copia-type polyprotein, putative [Arabidopsis thaliana]	TPSI	NULL	TPSI_0925	TY1_Copia	BC7	HCoak3	1.65509	237.657	B-up	79.2809	248.294	48.6298	88.1891	130.802	49.8351	40.1995	76.1541	59.0547	318.977	350.936	1552.4	46.7923
PR_85519		TPSI	NULL	TPSI_2358	TY1_Copia	BCmono	HCoak3	1.65876	225.487	B-up	113.893	84.2857	76.8634	119.204	124.916	73.4897	87.8035	74.9248	45.3297	105.833	501.576	1461.68	61.5279
PR_86101		NULL	NULL	NULL	NULL	NULL	NULL	1.65889	323.326	B-up	11.766	14.3272	16.7389	14.225	11.41	13.7025	10.2248	17.344	12.6985	516.946	571.332	1382.36	1610.16
PR_87575	polyprotein [Anopheles gambiae]	TPSI	NULL	TPSI_2468	TY1_Copia	BCmono	HCoak3	1.66793	102.069	B-up	27.851	48.1108	38.9653	32.4743	37.7435	30.8581	35.4984	71.2507	29.1092	87.4391	181.78	674.784	31.0258
PR_97403	PrAvh_208	PrAvh_208	NULL	NULL	NULL	NULL	NULL	1.66794	319.2	B-up	159.546	32.6159	60.1112	86.2113	49.1517	104.304	120.401	79.344	93.3649	368.525	2086.85	566.511	342.658
PR_86541	putative gag-pol polyprotein [Oryza sativa (japonica cultivar-group)]	TPSI	NULL	TPSI_5591	TY1_Copia	BCmono	HCoak3	1.67178	116.062	B-up	27.6442	64.5401	27.9935	77.2669	51.247	35.8089	34.1783	37.7659	29.4059	130.851	181.631	770.573	39.9003
PR_52854	reverse transcriptase [Picea abies]	TPSI	NULL	TPSI_5433	TY1_Copia	BCmono	HCoak3	1.67348	272.096	B-up	82.5424	290.593	130.747	113.975	143.478	49.8573	96.9313	72.9944	47.2077	284.706	347.23	1814.1	62.8842
PR_87919	retrotransposon element [Hyaloperonospora parasitica]	TPSI	GO:0003674_GO:0003676_GO:0003735_GO:0005198_GO:0005488_GO:0005575_GO:0005622_GO:0005623_GO:0005737_GO:0005840_GO:0006412_GO:0008150_GO:0008152_GO:0008270_GO:0009058_GO:0009059_GO:0009987_GO:0010467_GO:0019538_GO:0030529_GO:0032991_GO:0034645_GO:0034960_GO:0034961_GO:0043167_GO:0043169_GO:0043170_GO:0043226_GO:0043228_GO:0043229_GO:0043232_GO:0043283_GO:0043284_GO:0044237_GO:0044238_GO:0044249_GO:…	TPSI_3306	TY1_Copia	BC14	HCoak2	1.6761	291.001	B-up	25.0196	367.843	50.9192	63.4301	79.9031	50.73	51.0012	79.7482	45.4651	1803.34	191.077	853.053	121.489
PR_85154	Avh_15	PrAvh_15	NULL	NULL	NULL	NULL	NULL	1.67632	479.778	B-up	196.763	77.5872	111.912	128.026	99.0374	156.648	138.271	153.791	152.632	451.959	3134.07	1008.88	427.538
PR_74985		TPSI	NULL	TPSI_0054	TY1_Copia	BCduo	HCoak3	1.68198	259.379	B-up	51.2144	134.964	31.3255	71.313	119.426	40.7392	50.79	51.8471	46.6951	181.048	1189.44	1359.86	43.2623
PR_86641	putative Fourf gag/pol protein [Zea mays]	TPSI	GO:0003674_GO:0003676_GO:0003677_GO:0005488_GO:0006139_GO:0006259_GO:0008150_GO:0008152_GO:0009987_GO:0015074_GO:0034960_GO:0043170_GO:0043283_GO:0044237_GO:0044238_GO:0044260	TPSI_6051	TY1_Copia	BCmono	HCoak3	1.68286	75.8919	B-up	36.4536	35.9406	14.8027	30.4563	32.2931	25.8273	25.0244	35.6393	11.6206	68.0583	135.566	505.507	29.4052
PR_87153	Retrovirus-related Pol polyprotein from transposon TNT 1-94 [Includes: Protease ; Reverse transcriptase ; Endonuclease]	TPSI	GO:0003674_GO:0003676_GO:0003677_GO:0005488_GO:0006139_GO:0006259_GO:0008150_GO:0008152_GO:0008270_GO:0009987_GO:0015074_GO:0034960_GO:0043167_GO:0043169_GO:0043170_GO:0043283_GO:0044237_GO:0044238_GO:0044260_GO:0046872_GO:0046914	TPSI_1321	TY1_Copia	BCmono	HCoak2	1.68331	209.891	B-up	24.8137	222.717	27.4815	67.7657	49.9531	26.4682	42.901	39.1419	32.2388	1285.58	159.213	669.074	81.2448
PR_81056	putative gag-pol polyprotein [Oryza sativa (japonica cultivar-group)]	TPSI	GO:0003674_GO:0003676_GO:0003677_GO:0005488_GO:0006139_GO:0006259_GO:0008150_GO:0008152_GO:0009987_GO:0015074_GO:0034960_GO:0043170_GO:0043283_GO:0044237_GO:0044238_GO:0044260	TPSI_4799	TY1_Copia	BCmono	HCoak3	1.68432	253.149	B-up	50.6214	198.223	105.499	54.8809	126.633	99.166	92.6672	38.8952	56.3259	256.803	482.918	1673.08	55.2206
PR_53548		TPSI	NULL	TPSI_5652	TY1_Copia	BCmono	HCoak3	1.68519	488.727	B-up	79.1729	558.66	94.9619	150.988	179.601	84.9606	60.6511	74.3787	57.4917	1094.66	701.469	3134.32	82.1392
PR_44879		TPSI	NULL	TPSI_3046	TY1_Copia	BC18	HCoak3	1.68704	329.941	B-up	67.1462	316.652	63.5723	149.511	155.534	64.8844	83.0451	74.3967	59.3381	620.581	395.425	2172.92	66.2257
PR_78048	copia-like retrotransposable element [Arabidopsis thaliana]	TPSI	NULL	TPSI_3237	TY1_Copia	BCmono	HCoak2	1.68759	584.331	B-up	135.292	610.072	179.201	167.71	140.934	153.302	131.948	217.088	52.3586	3798.68	321.714	1373.44	314.562
PR_86100		NULL	NULL	NULL	NULL	NULL	NULL	1.68865	1780	B-up	138.452	104.386	53.274	152.203	83.3664	279.8	235.148	149.715	193.007	2657.44	5264.49	10655.4	3173.24
PR_87571	reverse transcriptase [Picea glauca]	TPSI	GO:0003674_GO:0003676_GO:0005488_GO:0008270_GO:0043167_GO:0043169_GO:0046872_GO:0046914	TPSI_2458	TY1_Copia	BCmono	HCoak3	1.68889	181.743	B-up	43.6412	165.749	35.8496	45.3172	78.8224	55.2607	54.0837	44.5494	28.7496	279.374	290.553	1201.01	39.7022
PR_86404		NULL	GO:0003674_GO:0003735_GO:0005198_GO:0005575_GO:0005622_GO:0005623_GO:0005737_GO:0005840_GO:0006412_GO:0008150_GO:0008152_GO:0009058_GO:0009059_GO:0009987_GO:0010467_GO:0019538_GO:0030529_GO:0032991_GO:0034645_GO:0034960_GO:0034961_GO:0043170_GO:0043226_GO:0043228_GO:0043229_GO:0043232_GO:0043283_GO:0043284_GO:0044237_GO:0044238_GO:0044249_GO:0044260_GO:0044267_GO:0044424_GO:0044444_GO:0044464	NULL	NULL	NULL	NULL	1.6901	1406.23	B-up	228.795	311.1	231.937	246.29	220.183	444.909	200.38	386.786	506.155	802.377	6552.44	804.034	7345.59
PR_78077		NULL	NULL	NULL	NULL	NULL	NULL	1.69052	125.878	B-up	65.1561	46.7877	43.3126	43.0193	31.2256	26.9643	26.2909	28.6925	29.975	25.6551	778.737	82.559	408.037
PR_87222	polyprotein [Anopheles gambiae]	TPSI	GO:0003674_GO:0003676_GO:0003677_GO:0005488_GO:0006139_GO:0006259_GO:0008150_GO:0008152_GO:0009987_GO:0015074_GO:0034960_GO:0043170_GO:0043283_GO:0044237_GO:0044238_GO:0044260	TPSI_1459	TY1_Copia	BC4	HCoak1	1.69116	154.767	B-up	18.2759	101.626	25.1867	41.7381	77.5993	31.4022	38.7813	34.4605	41.1979	97.3283	946.4	520.562	37.4181
PR_72346	ORF g	TPSI	NULL	TPSI_2030	TY1_Copia	BCmono	HCoak1	1.6975	116.705	B-up	46.8087	68.2767	43.1503	78.4685	60.3129	43.3063	35.6269	46.4697	43.1474	103.864	798.397	107.867	41.4653
PR_87663	copia-like retrotransposable element [Arabidopsis thaliana]	TPSI	GO:0003674_GO:0003676_GO:0003677_GO:0005488_GO:0006139_GO:0006259_GO:0008150_GO:0008152_GO:0009987_GO:0015074_GO:0034960_GO:0043170_GO:0043283_GO:0044237_GO:0044238_GO:0044260	TPSI_2758	TY1_Copia	BC9	HCoak3	1.70181	89.8179	B-up	32.6595	35.5828	26.6412	25.4757	57.4581	28.0079	29.7451	27.6697	35.76	73.1674	164.723	603.897	26.8454
PR_54500	putative polyprotein [Oryza sativa (japonica cultivar-group)]	TPSI	NULL	TPSI_5943	TY1_Copia	BCmono	HCoak3	1.70324	80.2892	B-up	14.8652	11.8731	11.8401	17.3515	14.6704	9.0122	9.3925	12.918	9.3838	300.613	90.5683	471.155	70.117
PR_85900		TPSI	GO:0003674_GO:0003676_GO:0005488_GO:0008270_GO:0043167_GO:0043169_GO:0046872_GO:0046914	TPSI_5825	TY1_Copia	BC6	HCoak3	1.70731	76.4913	B-up	35.7559	26.7702	20.2547	51.7677	39.8802	21.0514	35.2841	25.8641	25.6631	25.5265	158.057	512.033	16.4785
PR_82423		NULL	NULL	NULL	NULL	NULL	NULL	1.70794	166.112	B-up	58.7114	66.2305	52.4289	69.9888	45.8016	123.712	71.6842	66.4475	66.8943	123.018	115.087	157.024	1142.43
PR_79615		TPSI	GO:0003674_GO:0003676_GO:0005488_GO:0008270_GO:0043167_GO:0043169_GO:0046872_GO:0046914	TPSI_4348	TY1_Copia	BCduo	HCoak2	1.709	215.224	B-up	21.9452	165.501	27.8627	64.2956	73.1892	36.6069	40.2318	44.6812	37.5286	1342.98	165.691	691.366	86.0279
PR_87525		TPSI	GO:0003674_GO:0003676_GO:0005488_GO:0008270_GO:0043167_GO:0043169_GO:0046872_GO:0046914	TPSI_2385	TY1_Copia	BCmono	HCoak3	1.71147	114.183	B-up	47.3091	52.4537	39.2914	43.2564	57.4377	47.112	47.4291	34.0523	28.9847	65.283	208.909	773.519	39.3441
PR_87327		TPSI	NULL	TPSI_3203	TY1_Copia	BC11	HCoak3	1.7131	69.8255	B-up	27.8888	37.3055	14.6654	32.4594	32.5492	23.1679	32.4708	14.7558	13.7426	31.3649	156.389	465.635	25.3379
PR_87517	retrotransposon protein, putative, unclassified [Oryza sativa (japonica cultivar-group)]	TPSI	NULL	TPSI_5891	TY1_Copia	BCmono	HCoak2	1.71358	255.06	B-up	34.8685	356.032	69.7205	114.109	75.6477	45.8421	62.8496	93.5171	64.504	1714.88	117.401	430.731	135.684
PR_87329		TPSI	GO:0003674_GO:0003676_GO:0005488_GO:0008270_GO:0043167_GO:0043169_GO:0046872_GO:0046914	TPSI_1734	TY1_Copia	BC6	HCoak3	1.71358	133.19	B-up	40.7287	41.7864	33.5818	91.5537	46.1314	25.3596	92.6144	26.1669	20.2352	50.755	374.689	859.444	28.4211
PR_86598	pol polyprotein - fruit fly (Drosophila melanogaster) transposon 1731	TPSI	GO:0003674_GO:0003676_GO:0003677_GO:0005488_GO:0006139_GO:0006259_GO:0008150_GO:0008152_GO:0008270_GO:0009987_GO:0015074_GO:0034960_GO:0043167_GO:0043169_GO:0043170_GO:0043283_GO:0044237_GO:0044238_GO:0044260_GO:0046872_GO:0046914	TPSI_5825	TY1_Copia	BC4	HCoak3	1.71373	175.747	B-up	94.4507	82.9316	52.5587	69.7676	92.993	49.9992	47.8828	56.7391	66.4054	70.1631	400.96	1170.34	29.5104
PR_87340	copia LTR rider [Solanum lycopersicum]	TPSI	GO:0003674_GO:0003676_GO:0003677_GO:0005488_GO:0006139_GO:0006259_GO:0008150_GO:0008152_GO:0009987_GO:0015074_GO:0034960_GO:0043170_GO:0043283_GO:0044237_GO:0044238_GO:0044260	TPSI_1766	TY1_Copia	BCmono	HCoak3	1.71693	76.6356	B-up	17.882	48.6629	24.342	32.5176	45.9332	23.9181	18.681	23.3587	20.4358	87.2677	95.3271	524.666	33.2708
PR_86128	retrotransposon protein, putative, unclassified [Oryza sativa (japonica cultivar-group)]	TPSI	NULL	TPSI_4411	TY1_Copia	BCduo	HCoak2	1.71845	308.401	B-up	44.223	441.42	66.0113	88.7374	76.9709	60.2768	75.4723	136.066	48.2968	2048.18	111.99	635.667	175.9
PR_87930	retrofit [Oryza longistaminata]	TPSI	NULL	TPSI_3334	TY1_Copia	BCmono	HCoak1	1.71898	106.534	B-up	33.4128	55.7893	42.7832	44.4587	47.8758	61.3205	54.2314	48.8535	28.0366	98.0703	736.726	98.5814	34.7964
PR_87416		TPSI	GO:0003674_GO:0003676_GO:0005488_GO:0008270_GO:0043167_GO:0043169_GO:0046872_GO:0046914	TPSI_1989	TY1_Copia	BCduo	HCoak3	1.71957	101.752	B-up	62.7591	36.6414	26.8365	47.7129	43.9209	22.8398	36.8096	30.3761	20.3824	48.1678	250.158	673.612	22.5623
PR_87664		TPSI	GO:0003674_GO:0003676_GO:0005488_GO:0008270_GO:0043167_GO:0043169_GO:0046872_GO:0046914	TPSI_2765	TY1_Copia	BCmono	HCoak2	1.72044	358.545	B-up	43.9739	353.026	53.2224	87.3146	79.4347	60.7894	87.7044	71.3963	38.3166	2272.27	295.878	1090.72	127.029
PR_85737	copia LTR rider [Solanum lycopersicum]	TPSI	NULL	TPSI_3412	TY1_Copia	BCmono	HCoak1	1.72633	72.9072	B-up	35.1506	70.8079	23.8748	37.6915	26.5555	22.9728	26.1842	19.7736	20.9395	62.5006	504.552	69.435	27.3556
PR_72349		TPSI	NULL	TPSI_2833	TY1_Copia	BC18	HCoak3	1.72906	208.424	B-up	73.6827	224.324	36.5425	69.5033	94.5828	40.5108	60.375	33.6486	69.9653	274.555	275.196	1420.73	35.8881
PR_85855		NULL	NULL	NULL	NULL	NULL	NULL	1.72944	880.601	B-up	225.732	235.666	237.609	210.809	275.217	255.598	293.059	279.956	242.177	365.292	2518.35	576.568	5731.78
PR_87501	copia-like retrotransposable element [Arabidopsis thaliana]	TPSI	GO:0003674_GO:0003676_GO:0003677_GO:0005488_GO:0006139_GO:0006259_GO:0008150_GO:0008152_GO:0009987_GO:0015074_GO:0034960_GO:0043170_GO:0043283_GO:0044237_GO:0044238_GO:0044260	TPSI_2268	TY1_Copia	BC9	HCoak3	1.72981	220.06	B-up	66.4702	119.527	120.873	108.279	117.884	59.7798	78.2537	53.3889	56.5734	124.47	399.369	1503.62	52.2878
PR_87672		TPSI	NULL	TPSI_2779	TY1_Copia	BCmono	HCoak3	1.73081	681.36	B-up	121.004	560.848	118.101	288.674	278.813	88.2016	131.843	87.626	62.833	409.994	2450.61	4170.47	88.6635
PR_87713	retrotransposon element [Hyaloperonospora parasitica]	TPSI	GO:0003674_GO:0003676_GO:0005488_GO:0008270_GO:0043167_GO:0043169_GO:0046872_GO:0046914	TPSI_2892	TY1_Copia	BC15	HCoak2	1.73772	367.727	B-up	69.7874	332.832	84.9402	102.916	81.6636	77.9748	65.0772	89.8308	40.6821	2425.47	311.296	951.138	146.841
PR_87381		TPSI	GO:0003674_GO:0003676_GO:0005488_GO:0005575_GO:0005622_GO:0005623_GO:0005634_GO:0043226_GO:0043227_GO:0043229_GO:0043231_GO:0044424_GO:0044464	TPSI_1930	DDE_1	BCmono	HCoak1	1.74461	290.053	B-up	15.2655	9.6069	12.5992	15.4453	12.6579	13.1859	11.7438	8.3279	14.4018	877.94	1773.06	509.707	496.751
PR_87043	SD26211p [Drosophila melanogaster]	TPSI	NULL	TPSI_1060	TY1_Copia	BCmono	HCoak2	1.7457	929.521	B-up	165.753	965.209	85.4149	201.901	193.988	110.731	141.489	192.857	105.118	5979.66	858.857	2784.46	298.332
PR_87935		TPSI	GO:0003674_GO:0003676_GO:0005488_GO:0008270_GO:0043167_GO:0043169_GO:0046872_GO:0046914	TPSI_5739	TY1_Copia	BCmono	HCoak2	1.74711	487.898	B-up	80.3229	393.737	83.0473	125.226	135.878	113.447	121.058	104.406	38.2798	3157.87	357.331	1474.22	157.858
PR_93474		NULL	GO:0003674_GO:0003676_GO:0003677_GO:0003700_GO:0005488_GO:0005509_GO:0005515_GO:0006355_GO:0008150_GO:0009889_GO:0010468_GO:0010556_GO:0019219_GO:0019222_GO:0030528_GO:0031323_GO:0031326_GO:0043167_GO:0043169_GO:0045449_GO:0046872_GO:0050789_GO:0050794_GO:0051252_GO:0060255_GO:0065007_GO:0080090	NULL	NULL	NULL	NULL	1.74874	264.272	B-up	55.2724	58.256	76.3727	71.9587	76.9778	126.778	91.2629	182.208	108.859	94.3824	113.782	581.9	1797.53
PR_86643	putative gag-pol polyprotein [Oryza sativa (japonica cultivar-group)]	TPSI	NULL	TPSI_6070	TY1_Copia	BCmono	HCoak3	1.751	203.022	B-up	52.5526	133.557	52.6617	84.3136	99.8984	32.9536	44.7157	52.5337	57.4844	243.186	328.029	1399.65	57.7547
PR_45298	ORF g	TPSI	NULL	TPSI_2785	TY1_Copia	BC2	HCoak3	1.75381	542.998	B-up	131.769	315.77	86.4366	207.887	283.797	92.2295	97.3711	92.5119	95.2373	952.606	955.514	3676.04	71.8048
PR_87240	putative gag-pol polyprotein [Oryza sativa (japonica cultivar-group)]	TPSI	GO:0003674_GO:0003676_GO:0003677_GO:0005488_GO:0006139_GO:0006259_GO:0008150_GO:0008152_GO:0008270_GO:0009987_GO:0015074_GO:0034960_GO:0043167_GO:0043169_GO:0043170_GO:0043283_GO:0044237_GO:0044238_GO:0044260_GO:0046872_GO:0046914	TPSI_1547	TY1_Copia	BCmono	HCoak2	1.75485	314.565	B-up	67.5483	316.796	83.8178	110.082	93.9187	82.5865	76.7574	97.6539	78.0149	2164.47	212.343	584.753	120.603
PR_87766		TPSI	NULL	TPSI_5428	TY1_Copia	BCmono	HCoak3	1.75514	200.821	B-up	77.1505	72.2904	57.7735	108.96	118.315	71.1095	90.3124	39.8804	44.2905	83.1606	440.906	1370.98	35.5382
PR_86776	putative gag-pol polyprotein [Oryza sativa (japonica cultivar-group)]	TPSI	NULL	TPSI_0569	TY1_Copia	BCmono	HCoak3	1.75534	192.532	B-up	72.3191	124.051	58.8759	36.7117	75.7793	53.3991	88.3529	58.6965	62.1224	137.544	331.958	1335.62	67.48
PR_87576		TPSI	NULL	TPSI_2470	TY1_Copia	BCduo	HCoak2	1.75854	243.986	B-up	27.4029	269.236	30.696	73.1392	48.3956	21.9732	37.7092	56.0858	29.2132	1536.63	136.605	833.237	71.4937
PR_46323	tyrosine transaminase [Dictyostelium discoideum AX4]	NULL	GO:0003674_GO:0003824_GO:0005488_GO:0005496_GO:0006519_GO:0008150_GO:0008152_GO:0008289_GO:0008483_GO:0009058_GO:0009987_GO:0016740_GO:0016769_GO:0016829_GO:0016846_GO:0016847_GO:0019842_GO:0030170_GO:0044237_GO:0044238_GO:0048037_GO:0070279	NULL	NULL	NULL	NULL	1.75904	66.7388	B-up	36.2672	22.9598	28.6751	29.2262	37.0805	25.0593	18.8287	20.0823	20.7352	19.4279	105.098	466.375	37.7887
PR_87719	Retrovirus-related Pol polyprotein from transposon TNT 1-94 [Includes: Protease ; Reverse transcriptase ; Endonuclease]	TPSI	NULL	TPSI_2920	TY1_Copia	BCmono	HCoak3	1.76197	318.169	B-up	51.4602	247.765	80.2679	91.3692	143.571	64.7122	63.103	56.9145	60.7299	491.414	559.273	2174.91	50.7034
PR_87559	polyprotein [Anopheles gambiae]	TPSI	GO:0003674_GO:0003676_GO:0003677_GO:0005488_GO:0006139_GO:0006259_GO:0008150_GO:0008152_GO:0009987_GO:0015074_GO:0034960_GO:0043170_GO:0043283_GO:0044237_GO:0044238_GO:0044260	TPSI_2426	TY1_Copia	BCmono	HCoak3	1.76206	148.648	B-up	43.551	71.5982	37.5082	48.283	81.9478	28.972	44.2627	20.5545	21.4531	126.067	385.476	996.383	26.3627
PR_85520	polyprotein [Anopheles gambiae]	TPSI	GO:0003674_GO:0003676_GO:0003677_GO:0005488_GO:0006139_GO:0006259_GO:0008150_GO:0008152_GO:0009987_GO:0015074_GO:0034960_GO:0043170_GO:0043283_GO:0044237_GO:0044238_GO:0044260	TPSI_2359	TY1_Copia	BC4	HCoak3	1.76671	109.534	B-up	26.3268	45.3849	28.8679	38.1422	66.0359	28.5558	35.6403	35.8074	28.1189	80.3592	233.158	753.549	23.9945
PR_81285		NULL	GO:0003674_GO:0003735_GO:0005198_GO:0005575_GO:0005622_GO:0005623_GO:0005737_GO:0005840_GO:0006412_GO:0008150_GO:0008152_GO:0009058_GO:0009059_GO:0009987_GO:0010467_GO:0019538_GO:0030529_GO:0032991_GO:0034645_GO:0034960_GO:0034961_GO:0043170_GO:0043226_GO:0043228_GO:0043229_GO:0043232_GO:0043283_GO:0043284_GO:0044237_GO:0044238_GO:0044249_GO:0044260_GO:0044267_GO:0044424_GO:0044444_GO:0044464	NULL	NULL	NULL	NULL	1.76745	1308.42	B-up	200.934	245.674	167.111	207.285	176.62	469.666	206.609	300.246	451.877	716.387	7444.62	522.387	5900.02
PR_44605	copia-like retrotransposable element [Arabidopsis thaliana]	TPSI	NULL	TPSI_2369	TY1_Copia	BC5	HCoak3	1.76867	287.403	B-up	33.2666	231.097	46.8716	85.5613	139.703	35.1143	44.7719	38.6839	42.6925	466.556	589.837	1943.11	38.9719
PR_73321		NULL	GO:0003674_GO:0003676_GO:0003677_GO:0005488	NULL	NULL	NULL	NULL	1.76981	1172.37	B-up	328.139	196.782	198.644	279.506	189.631	419.952	341.905	401.274	538.37	644.066	7698.49	406.372	3597.66
PR_73252	ubiquinol:cytochrome c oxidoreductase biogenesis factor [Chlamydomonas reinhardtii]	NULL	GO:0000166_GO:0003674_GO:0003824_GO:0005488_GO:0005524_GO:0016462_GO:0016787_GO:0016817_GO:0016818_GO:0017076_GO:0017111_GO:0030554_GO:0032553_GO:0032555_GO:0032559	NULL	NULL	NULL	NULL	1.77001	898.684	B-up	256.59	288.656	230.068	236.851	182.281	292.591	237.533	202.417	229.318	150.719	4323.06	140.147	4912.66
PR_87599	pol polyprotein [Citrus x paradisi]	TPSI	GO:0003674_GO:0003676_GO:0003677_GO:0005488_GO:0006139_GO:0006259_GO:0008150_GO:0008152_GO:0008270_GO:0009987_GO:0015074_GO:0034960_GO:0043167_GO:0043169_GO:0043170_GO:0043283_GO:0044237_GO:0044238_GO:0044260_GO:0046872_GO:0046914	TPSI_2553	TY1_Copia	BCmono	HCoak3	1.77041	235.584	B-up	55.4872	180.953	45.1683	57.9678	110.016	37.2671	51.2267	51.3488	55.6529	342.307	419.009	1620.44	35.7516
PR_87207	retrotransposon protein, putative, unclassified [Oryza sativa (japonica cultivar-group)]	TPSI	GO:0003674_GO:0003676_GO:0003677_GO:0005488_GO:0006139_GO:0006259_GO:0008150_GO:0008152_GO:0009987_GO:0015074_GO:0034960_GO:0043170_GO:0043283_GO:0044237_GO:0044238_GO:0044260	TPSI_1430	TY1_Copia	BCmono	HCoak2	1.77169	376.999	B-up	122.689	538.985	93.2242	150.208	87.0323	76.4762	68.6408	85.5199	44.0637	2604.33	186.682	656.382	186.753
PR_87150	retrotransposon element [Hyaloperonospora parasitica]	TPSI	GO:0003674_GO:0003676_GO:0003677_GO:0005488_GO:0006139_GO:0006259_GO:0008150_GO:0008152_GO:0008270_GO:0009987_GO:0015074_GO:0034960_GO:0043167_GO:0043169_GO:0043170_GO:0043283_GO:0044237_GO:0044238_GO:0044260_GO:0046872_GO:0046914	TPSI_1316	TY1_Copia	BCmono	HCoak2	1.77486	318.328	B-up	36.2944	289.892	33.4998	89.6287	78.5771	44.7908	67.7643	94.2199	56.5059	2111.92	226.05	909.079	100.048
PR_87629	polyprotein [Anopheles gambiae]	TPSI	NULL	TPSI_2616	TY1_Copia	BCmono	HCoak3	1.77539	110.294	B-up	37.5713	69.2873	31.2871	36.2018	71.3552	43.0593	26.3561	30.503	26.8674	93.6255	170.922	774.821	21.9613
PR_53546	copia-like retrotransposable element [Arabidopsis thaliana]	TPSI	NULL	TPSI_2369	TY1_Copia	BC5	HCoak3	1.77955	239.101	B-up	28.6536	168.492	31.5275	68.182	67.8003	30.6948	50.1311	27.9708	41.8277	550.217	378.987	1613.2	50.6363
PR_87121	copia-like retrotransposable element [Arabidopsis thaliana]	TPSI	GO:0003674_GO:0003676_GO:0003677_GO:0005488_GO:0006139_GO:0006259_GO:0008150_GO:0008152_GO:0009987_GO:0015074_GO:0034960_GO:0043170_GO:0043283_GO:0044237_GO:0044238_GO:0044260	TPSI_1270	TY1_Copia	BC9	HCoak3	1.78004	142.801	B-up	36.6899	80.6252	52.8227	45.4497	53.3585	39.9877	49.8524	43.3886	50.3433	100.247	259.81	1000.81	43.0283
PR_72406	copia-type polyprotein [Arabidopsis thaliana]	TPSI	NULL	TPSI_4780	TY1_Copia	BC1	HCoak2	1.78119	1826.95	B-up	187.424	2184.3	114.835	394.486	296.806	218.087	178.012	356.626	126.196	11995	1502.34	5382.28	814.005
PR_42484	predicted protein [Physcomitrella patens subsp. patens]	NULL	GO:0000166_GO:0000287_GO:0003674_GO:0003824_GO:0004012_GO:0005215_GO:0005319_GO:0005488_GO:0005524_GO:0005548_GO:0005575_GO:0005623_GO:0006139_GO:0006163_GO:0006164_GO:0006753_GO:0006754_GO:0006810_GO:0006869_GO:0008150_GO:0008152_GO:0009117_GO:0009141_GO:0009142_GO:0009144_GO:0009145_GO:0009150_GO:0009152_GO:0009165_GO:0009199_GO:0009201_GO:0009205_GO:0009206_GO:0009259_GO:0009260_GO:0009987_GO:…	NULL	NULL	NULL	NULL	1.78342	81.4846	B-up	24.8001	27.565	17.182	22.4162	20.1237	34.2693	21.8541	45.0647	19.3879	43.6666	58.6852	154.087	570.198
PR_87730	retrotransposon element [Hyaloperonospora parasitica]	TPSI	GO:0003674_GO:0003676_GO:0003677_GO:0005488_GO:0006139_GO:0006259_GO:0008150_GO:0008152_GO:0009987_GO:0015074_GO:0034960_GO:0043170_GO:0043283_GO:0044237_GO:0044238_GO:0044260	TPSI_2383	TY1_Copia	BCmono	HCoak2	1.78586	266.91	B-up	76.6765	200.305	67.3251	109.252	102.166	55.3755	49.3598	67.9554	53.293	1862.02	191.58	528.014	106.506
PR_97228	PrAvh_33	PrAvh_33	NULL	NULL	NULL	NULL	NULL	1.78735	454.652	B-up	194.205	120.666	93.6133	109.984	87.9488	131.98	118.624	113.237	109.659	96.2152	1929.23	2719.57	85.5392
PR_87933	Retrovirus-related Pol polyprotein from transposon TNT 1-94 [Includes: Protease ; Reverse transcriptase ; Endonuclease]	TPSI	NULL	TPSI_3340	TY1_Copia	BC8	HCoak3	1.789	307.037	B-up	95.7008	252.252	34.4644	97.8744	97.2036	33.8081	64.866	34.5925	24.7464	513.269	588.548	2106.08	48.0763
PR_83229	retrotransposon element [Hyaloperonospora parasitica]	TPSI	GO:0003674_GO:0003676_GO:0005488_GO:0008270_GO:0043167_GO:0043169_GO:0046872_GO:0046914	TPSI_5739	TY1_Copia	BC14	HCoak2	1.79049	301.095	B-up	37.0374	240.848	35.9715	81.5789	63.1725	34.3585	48.4375	72.0752	54.1254	2000.58	249.468	893.694	102.884
PR_39974	copia-type polyprotein [Arabidopsis thaliana]	TPSI	NULL	TPSI_0301	TY1_Copia	BCduo	HCoak1	1.79135	139.964	B-up	72.2595	104.117	44.3011	58.7823	56.2803	41.6408	61.8445	51.4297	43.5649	106.314	1002.11	143.072	33.8159
PR_86757	retrotransposon element [Hyaloperonospora parasitica]	TPSI	GO:0003674_GO:0003676_GO:0005488_GO:0008270_GO:0043167_GO:0043169_GO:0046872_GO:0046914	TPSI_0527	TY1_Copia	BC14	HCoak2	1.79155	186.152	B-up	53.1123	182.142	34.2138	62.783	33.0712	35.3673	43.7081	40.8906	25.9722	1294.95	149.242	376.483	88.0363
PR_45445		TPSI	NULL	TPSI_4736	TY1_Copia	BC19	HCoak2	1.7918	2213.95	B-up	138.634	2575.13	95.6413	468.26	353.27	174.924	139.569	406.266	151.422	14228.5	1667.75	7407.75	974.231
PR_97375	PrAvh_180	PrAvh_180	NULL	NULL	NULL	NULL	NULL	1.79198	138.232	B-up	78.3538	33.6555	63.4119	67.7691	58.8163	45.232	51.2506	28.138	54.2857	36.8167	259.732	973.328	46.2209
PR_87707		TPSI	GO:0003674_GO:0003676_GO:0005488_GO:0008270_GO:0043167_GO:0043169_GO:0046872_GO:0046914	TPSI_2956	TY1_Copia	BCmono	HCoak3	1.79346	104.702	B-up	51.5761	26.4537	32.3942	46.828	44.1477	20.6761	57.2167	32.8933	35.5654	40.5883	212.254	734.103	26.4285
PR_78704	predicted protein [Laccaria bicolor S238N-H82]	NULL	GO:0003674_GO:0003824_GO:0009055_GO:0016491	NULL	NULL	NULL	NULL	1.79407	1170.7	B-up	364.735	329.632	503.014	381.797	308.794	460.929	292.406	276.113	299.993	122.683	4062.46	7575.41	241.093
PR_85518	retrotransposon protein, putative, Ty1-copia subclass [Oryza sativa (japonica cultivar-group)]	TPSI	GO:0003674_GO:0003676_GO:0003677_GO:0005488_GO:0006139_GO:0006259_GO:0008150_GO:0008152_GO:0008270_GO:0009987_GO:0015074_GO:0034960_GO:0043167_GO:0043169_GO:0043170_GO:0043283_GO:0044237_GO:0044238_GO:0044260_GO:0046872_GO:0046914	TPSI_2356	TY1_Copia	BCmono	HCoak3	1.79508	309.234	B-up	61.965	260.325	46.4037	113.74	142.531	26.0869	59.0761	52.8932	44.1469	514.708	510.765	2146.03	41.3685
PR_87464	polyprotein [Anopheles gambiae]	TPSI	GO:0003674_GO:0003676_GO:0003677_GO:0005488_GO:0006139_GO:0006259_GO:0008150_GO:0008152_GO:0009987_GO:0015074_GO:0034960_GO:0043170_GO:0043283_GO:0044237_GO:0044238_GO:0044260	TPSI_2181	TY1_Copia	BCmono	HCoak3	1.80411	199.218	B-up	130.643	125.335	54.7226	66.0437	115.109	36.0819	71.371	44.6939	49.6086	120.106	315.485	1419.64	40.9994
PR_87718	PREDICTED: similar to Copia protein (Gag-int-pol protein) [Tribolium castaneum]	TPSI	NULL	TPSI_2918	TY1_Copia	BC2	HCoak3	1.80465	272.103	B-up	28.3907	190.071	27.3419	43.6707	99.9842	33.7286	35.7355	38.3134	52.6686	577.653	512.449	1855.52	41.8182
PR_87230	Os07g0528100 [Oryza sativa (japonica cultivar-group)]	TPSI	GO:0003674_GO:0003676_GO:0003677_GO:0005488_GO:0006139_GO:0006259_GO:0008150_GO:0008152_GO:0008270_GO:0009987_GO:0015074_GO:0034960_GO:0043167_GO:0043169_GO:0043170_GO:0043283_GO:0044237_GO:0044238_GO:0044260_GO:0046872_GO:0046914	TPSI_1475	TY1_Copia	BC4	HCoak3	1.80865	117.861	B-up	46.8039	43.1284	24.6765	60.0502	66.4767	18.7616	43.529	34.2776	25.5075	68.9546	244.585	830.273	25.1658
PR_97416	PrAvh_221	PrAvh_221	NULL	NULL	NULL	NULL	NULL	1.80988	118.932	B-up	111.46	28.3639	40.8765	68.2258	36.6331	30.5432	38.8538	30.5873	15.847	31.7245	225.845	841.173	45.9857
PR_87909		TPSI	NULL	TPSI_1734	TY1_Copia	BCduo	HCoak3	1.81317	168.324	B-up	42.221	41.412	40.8837	54.6938	79.7386	34.3506	77.1072	35.229	36.0037	65.8752	506.203	1137.13	37.3539
PR_86742		TPSI	GO:0003674_GO:0003676_GO:0005488_GO:0008270_GO:0043167_GO:0043169_GO:0046872_GO:0046914	TPSI_0413	TY1_Copia	BC10	HCoak3	1.81362	170.362	B-up	68.9489	55.9663	115.274	145.825	72.8555	44.1083	39.6441	39.278	54.8731	68.8304	251.526	1221.98	35.5958
PR_84161	pleiotropic drug resistance transporter [Phytophthora sojae]	NULL	NULL	NULL	NULL	NULL	NULL	1.81495	509.776	B-up	193.637	47.6438	117.568	106.236	118.076	209.034	137.093	122.786	188.788	131.223	50.0662	1990.4	3214.54
PR_42137		TPSI	NULL	TPSI_1124	TY1_Copia	BC19	HCoak2	1.81596	1729.92	B-up	102.67	1862.18	102.507	366.076	228.006	145.483	109.841	451.497	81.4612	11503.1	1315.64	5332.92	887.597
PR_72367	retrovirus-related pol polyprotein [Laccaria bicolor S238N-H82]	TPSI	NULL	TPSI_3428	TY1_Copia	BC1	HCoak2	1.81703	1577.05	B-up	113.125	2043.83	69.8002	361.246	198.085	97.875	95.6707	309.336	63.9072	10344.9	1036.73	5105.57	661.554
PR_43632		TPSI	NULL	TPSI_4736	TY1_Copia	BC19	HCoak2	1.81824	2526.01	B-up	220.903	3686.88	103.677	515.937	407.45	117.885	123.774	514.033	92.4854	16687.2	1494.91	7807.66	1065.32
PR_45504	copia-type polyprotein [Arabidopsis thaliana]	TPSI	NULL	TPSI_0085	TY1_Copia	BC1	HCoak2	1.82005	1222.09	B-up	62.9612	1720.3	32.1255	225.412	127.887	78.9204	87.9794	275.639	52.6267	8085.31	820.79	3777.53	539.707
PR_87321	reverse transcriptase [Picea glauca]	TPSI	NULL	TPSI_1719	TY1_Copia	BCmono	HCoak3	1.82176	192.608	B-up	39.6302	213.89	35.865	44.5255	78.1366	20.9761	44.2108	27.2495	25.4564	427.992	162.914	1345.83	37.2241
PR_87519	ORF g	TPSI	NULL	TPSI_2335	TY1_Copia	BC2	HCoak3	1.82303	364.355	B-up	65.9007	296.116	69.0405	148.08	115.843	69.2004	54.446	63.6295	54.3165	523.263	640.334	2574.26	62.179
PR_74229	retrotransposon protein, putative, unclassified [Oryza sativa (japonica cultivar-group)]	TPSI	NULL	TPSI_4979	TY1_Copia	BCmono	HCoak2	1.82342	1367.87	B-up	153.908	1559.37	248.373	251.155	365.997	261.054	179.514	532.161	132.839	9664.93	1109.34	2641.07	682.629
PR_40639	ORF g	TPSI	NULL	TPSI_2440	TY1_Copia	BCduo	HCoak3	1.82411	355.382	B-up	82.3139	362.188	33.4066	112.56	163.771	46.6324	63.8246	84.6951	101.684	519.22	447.423	2535.42	66.8322
PR_87553	polyprotein [Anopheles gambiae]	TPSI	GO:0003674_GO:0003676_GO:0003677_GO:0005488_GO:0006139_GO:0006259_GO:0008150_GO:0008152_GO:0009987_GO:0015074_GO:0034960_GO:0043170_GO:0043283_GO:0044237_GO:0044238_GO:0044260	TPSI_2406	TY1_Copia	BC4	HCoak3	1.82465	141.608	B-up	49.234	82.382	43.9852	64.3775	80.6638	41.7497	47.074	33.519	26.0146	70.3983	265.96	1012.33	23.2097
PR_87533		TPSI	NULL	TPSI_2370	TY1_Copia	BCduo	HCoak2	1.82587	411.165	B-up	100.056	329.384	46.258	106.442	89.5794	68.6939	102.446	106.968	80.6239	2879.73	313.839	967.738	153.389
PR_50804		TPSI	NULL	TPSI_1349	TY1_Copia	BC2	HCoak3	1.82692	718.21	B-up	146.601	603.522	141.377	265.931	289.019	148.205	98.4576	91.3601	98.3082	1077.63	1194.17	5087.35	94.7964
PR_46202	copia-type polyprotein [Arabidopsis thaliana]	TPSI	NULL	TPSI_3151	TY1_Copia	BC1	HCoak2	1.82713	1582.55	B-up	165.728	2258.4	89.0694	349.214	172.443	107.198	97.1701	202.1	61.1778	10575.2	976.02	4744.41	775.031
PR_77767	predicted protein [Laccaria bicolor S238N-H82]	NULL	NULL	NULL	NULL	NULL	NULL	1.82793	942.505	B-up	673.001	183.054	354.53	254.865	307.628	489.458	297.725	289.658	479.431	699.284	6864.77	981.781	377.392
PR_87665	retrotransposon element [Hyaloperonospora parasitica]	TPSI	GO:0003674_GO:0003676_GO:0005488_GO:0008270_GO:0043167_GO:0043169_GO:0046872_GO:0046914	TPSI_2767	TY1_Copia	BC15	HCoak2	1.82806	297.573	B-up	67.5067	286.243	29.2371	73.9559	78.1484	40.824	50.4422	53.2429	29.8148	2042.34	176.505	821.463	118.737
PR_87942	predicted protein [Laccaria bicolor S238N-H82]	NULL	GO:0003674_GO:0003824_GO:0009055_GO:0016491	NULL	NULL	NULL	NULL	1.82952	1052.18	B-up	452.665	388.305	350.232	356.218	291.595	308.887	275.099	262.461	274.935	157.992	3149.57	7180.58	229.77
PR_87392	copia-like retrotransposable element [Arabidopsis thaliana]	TPSI	NULL	TPSI_2899	TY1_Copia	BCmono	HCoak2	1.83276	1337.19	B-up	69.3353	1811.1	50.9373	238.375	170.499	95.4899	74.4766	329.417	40.6399	8958.74	899.848	4050.34	594.322
PR_97289	PrAvh_94	PrAvh_94	NULL	NULL	NULL	NULL	NULL	1.83933	299.364	B-up	197.432	131.925	121.6	101.699	123.601	117.663	132.318	149.71	94.9925	73.7253	145.646	2197.22	304.192
PR_42184	polyprotein-like [Lycopersicon chilense]	TPSI	NULL	TPSI_1178	TY1_Copia	BCduo	HCoak3	1.83969	155.668	B-up	90.76	93.2471	39.9456	71.9459	69.2824	25.8213	54.6887	58.1119	40.482	82.7464	241.754	1130.55	24.348
PR_43653		TPSI	NULL	TPSI_1967	TY1_Copia	BC2	HCoak3	1.84553	356.349	B-up	52.0008	275.193	51.192	92.0151	108.323	62.7609	43.8886	61.9657	41.3802	587.025	695.935	2515.9	44.9595
PR_74793		NULL	GO:0003674_GO:0005488_GO:0005515_GO:0008270_GO:0043167_GO:0043169_GO:0046872_GO:0046914	NULL	NULL	NULL	NULL	1.8467	97.6677	B-up	61.5824	38.7962	39.5708	47.2861	52.252	28.106	35.5373	49.1	26.9391	47.481	67.2916	54.5353	721.203
PR_87536		TPSI	GO:0003674_GO:0003676_GO:0003677_GO:0005488_GO:0006139_GO:0006259_GO:0008150_GO:0008152_GO:0008270_GO:0009987_GO:0015074_GO:0034960_GO:0043167_GO:0043169_GO:0043170_GO:0043283_GO:0044237_GO:0044238_GO:0044260_GO:0046872_GO:0046914	TPSI_2383	TY1_Copia	BCmono	HCoak2	1.84704	299.896	B-up	49.035	267.078	27.6268	55.8715	49.292	25.9552	57.6916	69.3801	25.8453	2048.83	200.258	903.67	118.108
PR_43317	copia-type polyprotein [Arabidopsis thaliana]	TPSI	NULL	TPSI_1697	TY1_Copia	BC5	HCoak3	1.84836	635.16	B-up	104.476	363.922	89.6308	167.425	260.702	84.2049	107.636	88.3856	110.472	1166.16	1135.61	4496.68	81.7869
PR_79052	Avh_75	PrAvh_75	NULL	NULL	NULL	NULL	NULL	1.84873	106.637	B-up	32.1937	28.5511	42.1154	40.2637	40.3809	55.1683	34.8781	31.6969	57.1819	35.2634	115.293	784.362	88.9329
PR_72521	copia-type polyprotein [Arabidopsis thaliana]	TPSI	NULL	TPSI_1821	TY1_Copia	BC1	HCoak2	1.85218	1780.5	B-up	120.126	2315.39	144.736	388.778	292.153	166.502	117.485	313.208	89.1793	12323.8	1439.81	4729.32	706.025
PR_85545		TPSI	GO:0003674_GO:0003676_GO:0005488_GO:0008270_GO:0043167_GO:0043169_GO:0046872_GO:0046914	TPSI_2572	TY1_Copia	BC10	HCoak3	1.85268	193.633	B-up	92.4947	84.938	56.2647	84.0312	94.8157	77.5546	58.3159	61.265	48.075	64.4614	332.326	1411.66	51.0256
PR_87738	copia-like retrotransposable element [Arabidopsis thaliana]	TPSI	NULL	TPSI_2976	TY1_Copia	BCduo	HCoak3	1.85522	117.296	B-up	38.7281	39.7846	30.0847	45.9454	66.2437	24.6656	33.09	29.2346	29.7405	74.6971	239.94	846.585	26.1138
PR_86955	predicted protein [Laccaria bicolor S238N-H82]	NULL	NULL	NULL	NULL	NULL	NULL	1.859	243.607	B-up	54.6104	29.4238	40.8354	56.3152	60.6554	84.4127	93.5401	74.4317	106.83	45.6327	1632.06	851.682	36.4571
PR_86054	cell 5A endo-1,4-betaglucanase [Phytophthora ramorum]	NULL	NULL	NULL	NULL	NULL	NULL	1.85995	239.626	B-up	81.4321	86.4006	102.057	106.513	105.221	109.656	117.156	106.045	75.8697	98.739	163.441	182.318	1780.29
PR_45312	putative gag-pol polyprotein [Oryza sativa (japonica cultivar-group)]	TPSI	NULL	TPSI_2790	TY1_Copia	BC7	HCoak3	1.86031	223.514	B-up	44.851	148.369	31.4844	101.696	110.693	21.517	47.3142	51.1884	28.9579	279.719	375.491	1619.27	45.1305
PR_73682	predicted protein [Laccaria bicolor S238N-H82]	NULL	GO:0003674_GO:0003824_GO:0009055_GO:0016491	NULL	NULL	NULL	NULL	1.86123	1196.17	B-up	163.806	288.053	515.424	472.118	672.887	331.766	411.438	129.174	195.124	130.12	4167.06	8016.66	56.5747
PR_87422		TPSI	GO:0003674_GO:0003676_GO:0005488_GO:0008270_GO:0043167_GO:0043169_GO:0046872_GO:0046914	TPSI_2000	TY1_Copia	BC6	HCoak3	1.86274	89.184	B-up	39.2085	19.3637	19.0774	43.107	50.1605	24.6586	21.2555	20.1742	24.7099	28.5939	213.966	637.605	17.5117
PR_86018	copia-like retrotransposable element [Arabidopsis thaliana]	TPSI	NULL	TPSI_4201	TY1_Copia	BCmono	HCoak3	1.86317	204.224	B-up	38.3731	114.757	55.2657	42.6477	109.31	90.7389	68.0427	40.8622	21.2865	134.388	412.354	1479.04	47.8492
PR_50507	copia-type polyprotein [Arabidopsis thaliana]	TPSI	NULL	TPSI_2993	TY1_Copia	BC1	HCoak2	1.86359	2058.97	B-up	114.22	2777.03	60.6091	394	239.422	152.277	80.0656	425.612	68.8483	14059.9	1343.86	6172.31	878.418
PR_86580		TPSI	GO:0003674_GO:0003676_GO:0003677_GO:0005488_GO:0006139_GO:0006259_GO:0008150_GO:0008152_GO:0009987_GO:0015074_GO:0034960_GO:0043170_GO:0043283_GO:0044237_GO:0044238_GO:0044260	TPSI_5765	TY1_Copia	BC3	HCoak2	1.86437	424.787	B-up	64.7733	528.439	56.146	118.388	142.234	72.5883	71.1677	117.86	55.0609	3049.57	184.564	887.068	174.363
PR_87451	Os07g0434200 [Oryza sativa (japonica cultivar-group)]	TPSI	NULL	TPSI_2148	TY1_Copia	BC17	HCoak2	1.87228	2075.29	B-up	147.825	3250.11	94.0992	432.07	316.735	136.273	140.241	345.694	98.7767	13921.8	219.157	6794.99	1081
PR_87363	polyprotein [Anopheles gambiae]	TPSI	GO:0003674_GO:0003676_GO:0003677_GO:0005488_GO:0006139_GO:0006259_GO:0008150_GO:0008152_GO:0009987_GO:0015074_GO:0034960_GO:0043170_GO:0043283_GO:0044237_GO:0044238_GO:0044260	TPSI_1833	TY1_Copia	BC16	HCoak2	1.87417	483.181	B-up	76.4566	564.192	56.0053	134.036	124.822	48.8113	88.8323	142.954	76.8636	3456.87	232.703	1127.45	151.358
PR_87920	retrotransposon protein, putative, unclassified [Oryza sativa (japonica cultivar-group)]	TPSI	NULL	TPSI_3310	TY1_Copia	BCduo	HCoak2	1.87916	990.489	B-up	117.074	1258.4	91.9789	245.083	212.155	126.386	129.385	255.832	56.5055	7013.35	340.849	2536.22	493.139
PR_78703		NULL	GO:0003674_GO:0005215_GO:0005575_GO:0005623_GO:0006810_GO:0006857_GO:0008150_GO:0015833_GO:0016020_GO:0044464_GO:0051179_GO:0051234	NULL	NULL	NULL	NULL	1.88086	69.4503	B-up	10.5746	11.5837	17.2958	21.2693	17.5014	17.6188	13.3704	14.2748	12.0674	12.5175	429.554	312.319	12.9073
PR_86624		TPSI	GO:0003674_GO:0003676_GO:0005488_GO:0008270_GO:0043167_GO:0043169_GO:0046872_GO:0046914	TPSI_5988	TY1_Copia	BCduo	HCoak3	1.88456	117.578	B-up	29.0316	44.2107	35.2111	35.6309	81.5302	30.5322	36.8896	23.6487	33.0298	51.4047	232.587	862.755	32.0578
PR_95229		NULL	NULL	NULL	NULL	NULL	NULL	1.88474	88.8906	B-up	30.3721	41.5138	44.4118	39.8642	32.6933	44.4187	23.2229	32.8722	31.8013	30.8819	90.318	46.5363	666.672
PR_43338	putative gag-pol polyprotein [Oryza sativa (japonica cultivar-group)]	TPSI	NULL	TPSI_1720	TY1_Copia	BC7	HCoak3	1.88523	245.128	B-up	49.4173	183.514	35.13	79.3761	111.058	38.5377	49.6606	54.5102	53.2083	279.589	411.481	1800.7	40.477
PR_87606		TPSI	GO:0003674_GO:0003676_GO:0005488_GO:0008270_GO:0043167_GO:0043169_GO:0046872_GO:0046914	TPSI_2565	TY1_Copia	BCduo	HCoak3	1.88726	133.878	B-up	37.8276	61.9445	38.3299	40.846	49.4162	34.824	30.4337	29.6712	19.0471	55.0861	344.872	961.977	36.143
PR_78047	retrotransposon element [Hyaloperonospora parasitica]	TPSI	GO:0003674_GO:0003676_GO:0003677_GO:0005488_GO:0006139_GO:0006259_GO:0008150_GO:0008152_GO:0009987_GO:0015074_GO:0034960_GO:0043170_GO:0043283_GO:0044237_GO:0044238_GO:0044260	TPSI_3233	TY1_Copia	BCmono	HCoak2	1.88787	92.3468	B-up	41.0863	60.8301	30.3941	41.533	23.6859	29.7663	26.056	30.9735	17.8291	692.994	75.7134	73.9898	55.6576
PR_74540		NULL	GO:0005575_GO:0005576	NULL	NULL	NULL	NULL	1.88846	447.898	B-up	399.258	113.311	153.304	390.374	255.587	225.838	156.207	55.127	39.0031	53.4724	3317.22	638.601	25.3788
PR_46422	copia-type polyprotein [Arabidopsis thaliana]	TPSI	NULL	TPSI_3303	TY1_Copia	BC1	HCoak2	1.89643	1104.19	B-up	50.6257	1297.04	35.7928	142.041	145.282	68.2768	50.085	227.353	49.7268	7756.39	861.273	3143.96	526.636
PR_86229	Gag-Pol [Ipomoea batatas]	TPSI	GO:0003674_GO:0003676_GO:0003677_GO:0005488_GO:0006139_GO:0006259_GO:0008150_GO:0008152_GO:0008270_GO:0009987_GO:0015074_GO:0034960_GO:0043167_GO:0043169_GO:0043170_GO:0043283_GO:0044237_GO:0044238_GO:0044260_GO:0046872_GO:0046914	TPSI_4787	TY1_Copia	BCmono	HCoak2	1.89685	325.927	B-up	66.6542	397.835	36.4698	86.2384	84.344	50.9018	75.78	113.078	45.7702	2413.05	159.786	511.065	196.081
PR_97558	PrAvh_380	PrAvh_380	NULL	NULL	NULL	NULL	NULL	1.89746	187.424	B-up	101.617	41.8902	38.8079	69.5541	39.5538	67.9998	119.236	96.739	112.902	63.2701	95.0551	1412.58	177.299
PR_87607		TPSI	GO:0003674_GO:0003676_GO:0003677_GO:0005488_GO:0006139_GO:0006259_GO:0008150_GO:0008152_GO:0009987_GO:0015074_GO:0034960_GO:0043170_GO:0043283_GO:0044237_GO:0044238_GO:0044260	TPSI_2566	TY1_Copia	BC3	HCoak2	1.89935	384.07	B-up	91.2044	406.61	30.5137	72.1534	55.0606	49.7577	49.6044	98.9116	74.7838	2765.96	213.657	959.437	125.257
PR_72508	Retrovirus-related Pol polyprotein from transposon TNT 1-94 [Includes: Protease ; Reverse transcriptase ; Endonuclease]	TPSI	GO:0003674_GO:0003676_GO:0003677_GO:0005488_GO:0006139_GO:0006259_GO:0008150_GO:0008152_GO:0009987_GO:0015074_GO:0034960_GO:0043170_GO:0043283_GO:0044237_GO:0044238_GO:0044260	TPSI_1584	TY1_Copia	BCmono	HCoak3	1.90022	202.229	B-up	84.3227	124.297	56.9559	70.5191	100.463	60.5481	80.8056	44.1021	53.1205	106.002	298.42	1514.61	34.809
PR_74491		NULL	NULL	NULL	NULL	NULL	NULL	1.90079	122.667	B-up	32.9324	48.403	48.0399	35.7943	32.6681	70.6975	41.8308	82.1498	64.4654	86.075	91.9521	32.4562	927.207
PR_41787	ORF g	TPSI	NULL	TPSI_0905	TY1_Copia	BCduo	HCoak3	1.90147	446.642	B-up	63.5224	335.807	86.9431	181.666	175.627	67.3511	71.4271	67.0175	43.8026	678.628	673.019	3293.56	67.9773
PR_87557		TPSI	NULL	TPSI_2413	TY1_Copia	BC10	HCoak3	1.90528	143.649	B-up	35.5828	64.7062	29.7363	63.6602	75.8055	38.5003	50.3515	37.2593	40.6173	54.8209	294.056	1062.54	19.8019
PR_72516	copia-type polyprotein [Arabidopsis thaliana]	TPSI	NULL	TPSI_1718	TY1_Copia	BC1	HCoak2	1.90547	1320.17	B-up	81.6785	1689.54	114.311	240.227	200.555	139.463	109.802	281.598	56.4433	9362.95	775.591	3655.14	454.861
PR_42691	Os07g0434200 [Oryza sativa (japonica cultivar-group)]	TPSI	NULL	TPSI_1348	TY1_Copia	BCmono	HCoak2	1.90549	2802.64	B-up	214.669	2825.06	167.607	608.235	351.123	246.216	179.017	575.044	163.472	19741	1892.88	8322.7	1147.36
PR_39552	ORF g	TPSI	NULL	TPSI_0215	TY1_Copia	BC2	HCoak3	1.90748	443.155	B-up	88.725	430.197	71.666	122.133	152.416	73.7601	53.8816	84.6362	73.129	631.055	634.624	3283.34	61.4587
PR_41163	ORF g	TPSI	NULL	TPSI_0660	TY1_Copia	BC2	HCoak3	1.90838	605.897	B-up	121.685	425.725	212.41	186.686	227.351	135.262	90.3183	127.698	96.871	880.788	764.451	4517.2	90.2065
PR_85583		TPSI	NULL	TPSI_2865	TY1_Copia	BCduo	HCoak2	1.90865	1087.41	B-up	87.19	1396.58	217.27	224.364	250.337	147.067	169.976	304.003	101.328	7906.28	373.525	2497.89	460.565
PR_72542	Os10g0130700 [Oryza sativa (japonica cultivar-group)]	TPSI	GO:0003674_GO:0003676_GO:0003677_GO:0005488_GO:0006139_GO:0006259_GO:0008150_GO:0008152_GO:0009987_GO:0015074_GO:0034960_GO:0043170_GO:0043283_GO:0044237_GO:0044238_GO:0044260	TPSI_1073	TY1_Copia	BC16	HCoak2	1.90957	411.026	B-up	59.239	532.412	30.5646	93.8701	71.7527	30.1557	42.7923	104.384	21.5724	2946.85	174.48	1071.24	164.03
PR_45468	reverse transcriptase [Silene dioica]	TPSI	NULL	TPSI_2868	TY1_Copia	BC18	HCoak3	1.91032	310.875	B-up	52.1165	230.567	40.2628	123.627	141.368	32.7937	39.6214	38.115	64.7567	432.445	511.013	2300.19	34.5036
PR_85585		TPSI	GO:0003674_GO:0003676_GO:0005488_GO:0008270_GO:0043167_GO:0043169_GO:0046872_GO:0046914	TPSI_2883	TY1_Copia	BC10	HCoak3	1.9125	269.103	B-up	43.1555	92.7011	52.4858	97.0635	99.7805	64.1478	65.6908	85.4774	78.4647	126.829	671.939	1964.58	56.0297
PR_72518	copia-type polyprotein [Arabidopsis thaliana]	TPSI	NULL	TPSI_1721	TY1_Copia	BC1	HCoak2	1.9127	1647.19	B-up	183.328	2799.7	108.415	458.422	229.43	153.982	89.8086	355.068	132.95	11915	731.452	3616.32	639.535
PR_87680	retrotransposon protein, putative, unclassified [Oryza sativa (japonica cultivar-group)]	TPSI	NULL	TPSI_2787	TY1_Copia	BCmono	HCoak2	1.91499	910.85	B-up	91.1302	1299.35	42.2615	182.765	148.635	86.7157	100.284	279.93	43.6675	6501.08	251.101	2455.62	358.507
PR_45211	putative gag-pol polyprotein [Oryza sativa (japonica cultivar-group)]	TPSI	NULL	TPSI_2713	TY1_Copia	BCmono	HCoak3	1.91982	267.115	B-up	73.3331	202.303	40.5123	118.781	140.542	29.848	48.8347	40.4711	35.7209	334.572	371.98	2001.71	33.8962
PR_72484	ORF g	TPSI	NULL	TPSI_1071	TY1_Copia	BC2	HCoak3	1.92055	116.053	B-up	13.8451	72.1672	15.1161	26.3436	40.4585	18.3747	25.4827	31.771	26.6738	147.393	199.516	864.867	26.6855
PR_87397	putative retroelement pol polyprotein [Arabidopsis thaliana]	TPSI	NULL	TPSI_1951	TY1_Copia	BC5	HCoak3	1.92093	435.401	B-up	108.498	371.158	78.0649	127.375	219.062	76.9032	82.2693	96.3194	102.574	521.076	516.242	3280.47	80.1985
PR_87365		TPSI	GO:0003674_GO:0003676_GO:0003677_GO:0005488_GO:0006139_GO:0006259_GO:0008150_GO:0008152_GO:0009987_GO:0015074_GO:0034960_GO:0043170_GO:0043283_GO:0044237_GO:0044238_GO:0044260	TPSI_1840	TY1_Copia	BC3	HCoak2	1.92579	215.063	B-up	27.8963	205.954	14.7372	35.1357	43.4324	31.2203	28.388	39.1611	23.5563	1551.04	125.433	594.744	75.1284
PR_87531	polyprotein [Anopheles gambiae]	TPSI	GO:0003674_GO:0003676_GO:0003677_GO:0005488_GO:0006139_GO:0006259_GO:0008150_GO:0008152_GO:0009987_GO:0015074_GO:0034960_GO:0043170_GO:0043283_GO:0044237_GO:0044238_GO:0044260	TPSI_2366	TY1_Copia	BC4	HCoak3	1.92739	151.185	B-up	26.1691	60.504	51.2658	37.4403	95.5103	48.4455	28.5286	43.3107	23.9554	89.6152	302.581	1130.26	27.8125
PR_84855		NULL	NULL	NULL	NULL	NULL	NULL	1.92854	151.91	B-up	76.5269	27.1182	62.1366	54.3175	80.0737	94.3082	69.1084	47.2397	25.0629	12.9543	29.7189	1147.35	248.919
PR_86522		TPSI	GO:0003674_GO:0003676_GO:0003677_GO:0005488_GO:0006139_GO:0006259_GO:0008150_GO:0008152_GO:0009987_GO:0015074_GO:0034960_GO:0043170_GO:0043283_GO:0044237_GO:0044238_GO:0044260	TPSI_5549	TY1_Copia	BC3	HCoak2	1.92923	397.144	B-up	29.3798	442.547	42.1921	114.254	71.2421	41.0497	43.8182	107.955	50.5746	2887.1	173.267	1032.43	127.065
PR_42647	polyprotein [Arabidopsis thaliana]	TPSI	NULL	TPSI_1314	TY1_Copia	BC5	HCoak3	1.93302	345.14	B-up	57.6374	354.105	59.3929	98.7437	133.665	59.5694	61.7452	45.1013	55.3644	416.579	486.321	2597.87	60.7283
PR_72334	alcohol dehydrogenase, putative [Aspergillus clavatus NRRL 1]	NULL	GO:0003674_GO:0003824_GO:0005488_GO:0008270_GO:0016491_GO:0043167_GO:0043169_GO:0046872_GO:0046914	NULL	NULL	NULL	NULL	1.93387	1251.55	B-up	449.231	418.297	278.729	351.811	365.457	372.308	388.756	369.066	534.683	434.319	9516.66	924.53	1866.24
PR_72456	ORF g	TPSI	NULL	TPSI_0513	TY1_Copia	BC2	HCoak3	1.93443	165.049	B-up	18.0595	113.02	14.3515	47.6325	46.2669	16.6053	23.2526	21.9381	21.7494	219.251	359.619	1217.26	26.6261
PR_45951	retrotransposon protein, putative, Ty1-copia subclass [Oryza sativa (japonica cultivar-group)]	TPSI	NULL	TPSI_2356	TY1_Copia	BC8	HCoak3	1.93594	310.743	B-up	40.3181	220.337	24.9391	79.4553	104.544	33.3645	42.6788	51.6934	34.2896	517.65	534.961	2308.42	47.0054
PR_44226	copia-like retrotransposable element [Arabidopsis thaliana]	TPSI	NULL	TPSI_2147	TY1_Copia	BC5	HCoak3	1.93612	433.154	B-up	70.2093	350.591	48.3316	105.153	176.176	52.1324	59.9675	50.7191	38.8143	612.587	793.769	3223.63	48.9222
PR_72492	ORF g	TPSI	NULL	TPSI_1298	TY1_Copia	BC2	HCoak3	1.94013	113.487	B-up	16.1692	65.7477	11.2983	27.4245	38.5691	13.6475	16.3403	13.8926	19.8787	154.387	240.312	841.319	16.3519
PR_86486		TPSI	NULL	TPSI_5441	TY1_Copia	BCmono	HCoak2	1.94267	227.375	B-up	27.989	201.047	19.0688	28.3323	46.5447	24.3574	37.8749	32.1445	21.8318	1640.69	130.279	667.466	78.2507
PR_86711		TPSI	NULL	TPSI_0260	TY1_Copia	BC3	HCoak2	1.94458	234.857	B-up	28.0017	205.225	26.4889	46.5909	49.8593	35.3178	43.0705	51.9509	31.897	1740.95	166.631	556.545	70.6042
PR_86137	retrotransposon element [Hyaloperonospora parasitica]	TPSI	GO:0003674_GO:0003676_GO:0003677_GO:0005488_GO:0006139_GO:0006259_GO:0008150_GO:0008152_GO:0008270_GO:0009987_GO:0015074_GO:0034960_GO:0043167_GO:0043169_GO:0043170_GO:0043283_GO:0044237_GO:0044238_GO:0044260_GO:0046872_GO:0046914	TPSI_4348	TY1_Copia	BCmono	HCoak2	1.94472	341.339	B-up	34.1463	336.488	41.7493	62.331	72.0026	52.3201	50.3867	90.162	47.4994	2545.67	216.278	744.45	143.926
PR_87402	polyprotein [Anopheles gambiae]	TPSI	GO:0003674_GO:0003676_GO:0003677_GO:0005488_GO:0006139_GO:0006259_GO:0008150_GO:0008152_GO:0009987_GO:0015074_GO:0034960_GO:0043170_GO:0043283_GO:0044237_GO:0044238_GO:0044260	TPSI_1962	TY1_Copia	BCmono	HCoak2	1.94601	416.739	B-up	44.9069	389.103	57.4919	60.2374	106.703	71.2605	56.2397	99.9055	36.8334	3065.79	216.699	1072.74	139.701
PR_45313	copia-like retrotransposable element [Arabidopsis thaliana]	TPSI	NULL	TPSI_2791	TY1_Copia	BC5	HCoak3	1.94639	598.102	B-up	138.241	490.619	172.525	206.643	268.515	107.642	122.632	94.4141	98.0728	629.09	822.611	4554.27	70.0484
PR_44319	putative polyprotein [Oryza sativa (japonica cultivar-group)]	TPSI	NULL	TPSI_2288	TY1_Copia	BCduo	HCoak3	1.94953	141.797	B-up	40.7412	61.4592	36.3128	52.0915	78.2232	31.4924	52.5863	27.1628	36.6731	93.3434	218.772	1084.39	30.1128
PR_83651		NULL	NULL	NULL	NULL	NULL	NULL	1.95118	85.7665	B-up	24.1399	51.8619	45.5886	24.8775	33.9927	50.0227	44.3508	25.6773	13.2748	61.8817	17.3567	58.872	663.068
PR_84819		TPSI	GO:0003674_GO:0003676_GO:0003677_GO:0005488_GO:0006139_GO:0006259_GO:0008150_GO:0008152_GO:0008270_GO:0009987_GO:0015074_GO:0034960_GO:0043167_GO:0043169_GO:0043170_GO:0043283_GO:0044237_GO:0044238_GO:0044260_GO:0046872_GO:0046914	TPSI_0553	TY1_Copia	BCmono	HCoak2	1.95129	351.845	B-up	49.3633	400.838	80.7786	94.6107	50.6211	41.7598	55.6079	120.048	50.0786	2655.2	167.316	658.523	149.242
PR_87566		TPSI	NULL	TPSI_2441	TY1_Copia	BCmono	HCoak2	1.95436	623.827	B-up	89.7247	812.106	62.0403	104.468	81.0498	74.5751	57.5445	270.738	64.1193	4678.59	281.011	1247.94	285.855
PR_72557	putative polyprotein [Oryza sativa (japonica cultivar-group)]	TPSI	NULL	TPSI_3312	TY1_Copia	BC1	HCoak2	1.95513	1312.02	B-up	115.05	2046.7	97.6675	250.73	160.407	106.114	78.9196	240.123	50.6391	9650.23	690.045	3120.43	449.239
PR_86682		TPSI	NULL	TPSI_0105	TY1_Copia	BC1	HCoak2	1.95637	331.822	B-up	53.7218	301.589	46.5524	66.4849	62.2085	57.8733	58.7835	85.3612	52.9522	2524.59	251.839	561.801	189.94
PR_85299	ATP-binding cassette transporter, subfamily B, member 14, group MDR/PGP protein PpABCB14 [Physcomitrella patens subsp. patens]	NULL	GO:0000166_GO:0003674_GO:0003824_GO:0005215_GO:0005488_GO:0005524_GO:0005575_GO:0005623_GO:0006810_GO:0008150_GO:0015399_GO:0015405_GO:0016020_GO:0016021_GO:0016462_GO:0016787_GO:0016817_GO:0016818_GO:0016820_GO:0016887_GO:0017076_GO:0017111_GO:0022804_GO:0022857_GO:0030554_GO:0031224_GO:0032553_GO:0032555_GO:0032559_GO:0042623_GO:0042626_GO:0043492_GO:0044425_GO:0044464_GO:0051179_GO:0051234	NULL	NULL	NULL	NULL	1.96072	182.683	B-up	71.7288	52.9221	54.9555	57.0379	59.7394	66.6374	42.801	74.8892	53.1561	66.5599	175.287	184.997	1414.17
PR_72522	copia-type polyprotein [Arabidopsis thaliana]	TPSI	NULL	TPSI_1914	TY1_Copia	BC1	HCoak2	1.96412	1835.9	B-up	186.635	2630.88	97.0387	380.926	163.387	88.9791	105.126	302.224	99.5118	13406.4	784.629	4984.2	636.783
PR_73454	Adenosylcobalamin-dependent ribonucleoside-triphosphate reductase (RTPR)	NULL	NULL	NULL	NULL	NULL	NULL	1.96569	1604.48	B-up	878.115	964.741	970.558	830.328	618.642	587.154	528.972	430.784	381.786	498.453	12508.9	896.551	763.265
PR_44885	ORF g	TPSI	NULL	TPSI_2536	TY1_Copia	BC2	HCoak3	1.96866	691.415	B-up	158.394	438.089	89.9562	269.948	244.439	58.6997	114.382	97.6374	108.377	925.747	1127.47	5269.68	85.5749
PR_85515		TPSI	GO:0003674_GO:0003676_GO:0003677_GO:0005488_GO:0006139_GO:0006259_GO:0008150_GO:0008152_GO:0009987_GO:0015074_GO:0034960_GO:0043170_GO:0043283_GO:0044237_GO:0044238_GO:0044260	TPSI_2290	TY1_Copia	BC3	HCoak2	1.96884	417.887	B-up	95.1567	504.843	68.6796	74.2608	71.3626	42.4487	72.7942	86.8078	37.122	3152.9	202.261	878.716	145.18
PR_72914	carbonic anhydrase 2 [Neurospora crassa OR74A]	NULL	GO:0003674_GO:0003824_GO:0004089_GO:0005488_GO:0008150_GO:0008152_GO:0008270_GO:0015976_GO:0016829_GO:0016835_GO:0016836_GO:0043167_GO:0043169_GO:0046872_GO:0046914	NULL	NULL	NULL	NULL	1.9702	209.354	B-up	67.5292	85.632	99.0939	73.8585	65.3679	90.914	64.8418	73.5389	62.5772	115.118	138.957	149.103	1635.07
PR_43020	copia-like retrotransposable element [Arabidopsis thaliana]	TPSI	NULL	TPSI_1670	TY1_Copia	BC5	HCoak3	1.97141	447.785	B-up	96.9629	356.468	76.0444	165.426	205.097	57.4979	96.0374	86.4348	72.7362	458.233	634.179	3447.24	68.8583
PR_80072		NULL	GO:0003674_GO:0003824_GO:0004553_GO:0005975_GO:0008150_GO:0008152_GO:0016787_GO:0016798_GO:0044238	NULL	NULL	NULL	NULL	1.97292	648.913	B-up	248.549	190.536	286.864	331.03	289.83	269.796	246.297	246.837	223.925	256.356	184.946	589.86	5071.04
PR_86783	putative polyprotein [Oryza sativa (japonica cultivar-group)]	TPSI	NULL	TPSI_0588	TY1_Copia	BCduo	HCoak2	1.97631	516.383	B-up	93.8129	605.504	83.0752	141.34	130.441	68.9984	77.9183	193.244	79.7557	3973.89	216.129	792.151	256.711
PR_86740	retrofit [Oryza longistaminata]	TPSI	GO:0003674_GO:0003676_GO:0005488_GO:0008270_GO:0043167_GO:0043169_GO:0046872_GO:0046914	TPSI_0403	TY1_Copia	BCmono	HCoak2	1.97695	725.535	B-up	57.3026	818.303	59.1582	115.932	128.249	76.124	59.3172	122.286	48.0094	5354.09	294.358	2004.02	294.807
PR_72491	copia LTR rider [Solanum lycopersicum]	TPSI	NULL	TPSI_1280	TY1_Copia	BCmono	HCoak1	1.97849	88.2269	B-up	25.0889	36.5501	32.1099	23.7943	25.6442	19.2874	26.2496	32.2217	57.4476	67.9723	689.321	84.8567	26.4061
PR_42670	reverse transcriptase [Picea glauca]	TPSI	NULL	TPSI_1330	TY1_Copia	BCmono	HCoak3	1.97884	254.85	B-up	52.8336	155.167	29.3689	89.6938	91.602	29.712	37.3038	35.7705	42.7587	359.763	404.476	1951.12	33.4803
PR_87173	putative polyprotein [Oryza sativa (japonica cultivar-group)]	TPSI	GO:0003674_GO:0003676_GO:0003677_GO:0005488_GO:0006139_GO:0006259_GO:0008150_GO:0008152_GO:0008270_GO:0009987_GO:0015074_GO:0034960_GO:0043167_GO:0043169_GO:0043170_GO:0043283_GO:0044237_GO:0044238_GO:0044260_GO:0046872_GO:0046914	TPSI_1364	TY1_Copia	BCmono	HCoak2	1.97893	658.546	B-up	91.4308	1019.91	29.7618	157.736	100.627	38.209	47.9028	207.417	24.2272	4951.44	194.377	1391.56	306.497
PR_80549	Hypothetical protein CBG22901 [Caenorhabditis briggsae AF16]	NULL	NULL	NULL	NULL	NULL	NULL	1.98337	2992.29	B-up	560.241	730.339	736.676	648.284	879.659	612.305	632.034	697.165	582.947	895.019	21977	682.891	9265.2
PR_75968	Quinone oxidoreductase [Nodularia spumigena CCY9414]	NULL	GO:0003674_GO:0003824_GO:0005488_GO:0008270_GO:0016491_GO:0043167_GO:0043169_GO:0046872_GO:0046914	NULL	NULL	NULL	NULL	1.98503	438.893	B-up	179.642	143.7	114.895	74.0155	82.7901	168.314	160.133	102.98	179.532	133.072	3391.01	168.67	806.85
PR_42696	ORF g	TPSI	NULL	TPSI_1356	TY1_Copia	BC2	HCoak3	1.9875	537.53	B-up	81.5736	425.755	62.4115	168.887	200.918	36.8275	74.7383	55.0328	51.8877	620.244	1056.49	4100.82	52.3013
PR_45718	ORF g	TPSI	NULL	TPSI_2957	TY1_Copia	BC2	HCoak3	1.98751	673.241	B-up	98.5438	457.807	85.0053	222.982	253.31	72.7812	84.9568	87.5621	92.4695	1027.1	1037.48	5163.6	68.5276
PR_72524	copia-type polyprotein [Arabidopsis thaliana]	TPSI	NULL	TPSI_1994	TY1_Copia	BC1	HCoak2	1.98778	1955.62	B-up	107.257	2288.46	73.5033	256.013	249.1	123.335	103.969	352.847	74.2644	14326.7	978.504	5829.46	659.64
PR_87337		TPSI	GO:0003674_GO:0003676_GO:0005488_GO:0008270_GO:0043167_GO:0043169_GO:0046872_GO:0046914	TPSI_1754	TY1_Copia	BCmono	HCoak2	1.9887	706.111	B-up	92.476	672.404	55.0879	156.363	119.24	75.9921	111.765	173.25	71.197	5309.39	284.546	1794.64	263.079
PR_40851	ORF g	TPSI	NULL	TPSI_1406	TY1_Copia	BC2	HCoak3	1.989	835.61	B-up	105.667	684.954	217.262	226.447	296.524	131.165	94.9978	94.8993	80.8119	1202.74	1202.25	6432.61	92.6085
PR_45291		TPSI	NULL	TPSI_2782	TY1_Copia	BC12	HCoak2	1.98938	1375.75	B-up	83.2142	1820.43	57.9456	333.945	164.948	83.2099	85.9928	310.161	41.3037	10146.9	456.099	3881.34	419.322
PR_86289		TPSI	NULL	TPSI_4957	TY1_Copia	BCmono	HCoak3	1.98984	242.8	B-up	65.4177	118.459	78.8793	60.2726	120.927	75.2309	62.5053	41.3438	69.6163	111.348	398.706	1888.46	65.2388
PR_72540	retrotransposon protein, putative, Ty1-copia subclass [Oryza sativa (japonica cultivar-group)]	TPSI	NULL	TPSI_2575	TY1_Copia	BC8	HCoak3	1.99114	224.127	B-up	20.4221	172.231	39.2322	54.758	77.5946	24.8833	34.2454	31.6713	31.1363	341.704	317.533	1725.76	42.4805
PR_85516		NULL	NULL	NULL	NULL	NULL	NULL	1.99486	179.01	B-up	48.7036	34.381	33.3851	31.555	36.6922	31.0594	29.4487	25.4207	28.7693	33.9017	1314.44	111.265	568.105
PR_87395	polyprotein [Anopheles gambiae]	TPSI	GO:0003674_GO:0003676_GO:0003677_GO:0005488_GO:0006139_GO:0006259_GO:0008150_GO:0008152_GO:0009987_GO:0015074_GO:0034960_GO:0043170_GO:0043283_GO:0044237_GO:0044238_GO:0044260	TPSI_1946	TY1_Copia	BCmono	HCoak2	1.99649	445.655	B-up	49.7511	472.262	45.8846	53.6855	93.0603	54.53	39.2336	109.534	38.4711	3359.42	153.313	1125.87	198.502
PR_87042		TPSI	GO:0003674_GO:0003676_GO:0003677_GO:0005488_GO:0006139_GO:0006259_GO:0008150_GO:0008152_GO:0009987_GO:0015074_GO:0034960_GO:0043170_GO:0043283_GO:0044237_GO:0044238_GO:0044260	TPSI_5765	TY1_Copia	BC3	HCoak2	2.00123	258.549	B-up	36.5698	231.777	26.2095	58.8797	35.0289	38.4578	22.5771	53.0939	35.0383	1978.76	150.959	574.864	118.921
PR_74805		NULL	NULL	NULL	NULL	NULL	NULL	2.00154	71.1623	B-up	32.824	34.6042	24.6791	41.2274	25.0482	30.7413	36.5395	37.2874	24.0963	29.6675	23.8657	20.3991	564.13
PR_82628		TPSI	GO:0003674_GO:0003676_GO:0005488_GO:0008270_GO:0043167_GO:0043169_GO:0046872_GO:0046914	TPSI_5431	TY1_Copia	BC11	HCoak3	2.00297	162.276	B-up	42.3556	55.6814	35.3766	45.4843	59.3683	35.2971	48.2624	18.9143	42.411	43.3133	413.17	1234.68	35.2718
PR_86019	polyprotein [Anopheles gambiae]	TPSI	GO:0003674_GO:0003676_GO:0003677_GO:0005488_GO:0006139_GO:0006259_GO:0008150_GO:0008152_GO:0009987_GO:0015074_GO:0034960_GO:0043170_GO:0043283_GO:0044237_GO:0044238_GO:0044260	TPSI_4204	TY1_Copia	BCmono	HCoak2	2.00339	312.059	B-up	43.0989	344.886	29.4422	81.6083	50.7287	27.4871	50.5935	77.2804	26.5647	2394.73	162.319	657.926	110.104
PR_46459	Os08g0389500 [Oryza sativa (japonica cultivar-group)]	TPSI	NULL	TPSI_3354	TY1_Copia	BC17	HCoak2	2.00736	2080.07	B-up	159.162	2289.28	92.1716	337.699	227.332	99.9279	94.8367	447.262	77.1837	15545.6	1092.18	5812.39	765.892
PR_75920		NULL	NULL	NULL	NULL	NULL	NULL	2.00801	3248.05	B-up	409.104	166.358	278.526	380.04	357.876	314.774	306.599	307.097	399.154	972.436	17085.5	1388.59	19858.6
PR_85956		TPSI	NULL	TPSI_4002	TY1_Copia	BC1	HCoak2	2.01021	668.61	B-up	109.376	791.09	69.2653	117.615	142.894	69.117	80.4752	288.971	98.6962	5192.19	298.718	1185.05	248.466
PR_95696	predicted protein [Monosiga brevicollis MX1]	NULL	NULL	NULL	NULL	NULL	NULL	2.01167	274.925	B-up	102.13	106.084	55.902	108.638	116.86	72.7598	85.9186	114.993	100.895	92.0336	334.057	106.321	2177.43
PR_96736		NULL	GO:0001871_GO:0003674_GO:0003824_GO:0004553_GO:0005488_GO:0005575_GO:0005576_GO:0005975_GO:0008150_GO:0008152_GO:0016787_GO:0016798_GO:0030246_GO:0030247_GO:0030248_GO:0044238	NULL	NULL	NULL	NULL	2.01197	76.009	B-up	23.8232	49.5358	43.5565	20.0543	26.4439	41.8302	28.4597	29.992	28.4643	25.2162	30.4173	35.3125	605.011
PR_87631	copia-like retrotransposable element [Arabidopsis thaliana]	TPSI	NULL	TPSI_2624	TY1_Copia	BC5	HCoak3	2.01388	326.71	B-up	49.3989	278.279	41.8623	112.572	90.4832	47.7897	45.8502	33.489	45.4769	413.123	500.682	2546.01	42.2187
PR_80191		NULL	NULL	NULL	NULL	NULL	NULL	2.01476	1768.37	B-up	382.979	400.19	370.067	355.869	472.349	575.468	502.709	524.273	497.626	746.328	4274.62	290.007	13596.3
PR_97215	PrAvh_20	PrAvh_20	NULL	NULL	NULL	NULL	NULL	2.01489	126.406	B-up	52.4668	54.6318	34.4909	37.6227	28.3491	72.6181	38.2829	34.0169	48.688	48.6395	116.506	1005.25	71.7212
PR_87194	retrotransposon protein, putative, Ty1-copia subclass [Oryza sativa (japonica cultivar-group)]	TPSI	NULL	TPSI_1407	TY1_Copia	BCmono	HCoak2	2.02103	650.732	B-up	33.4407	854.182	37.1979	134.873	69.0291	57.3322	39.847	92.5968	42.8192	4895.56	234.22	1778.16	190.252
PR_87741		TPSI	GO:0003674_GO:0003676_GO:0005488_GO:0008270_GO:0043167_GO:0043169_GO:0046872_GO:0046914	TPSI_2990	TY1_Copia	BCmono	HCoak2	2.02357	771.454	B-up	55.8924	847.364	55.3953	199.112	82.2607	58.2784	75.8017	150.296	56.06	5915.6	383.912	1836.65	312.273
PR_87413	pol polyprotein [Anopheles gambiae]	TPSI	GO:0003674_GO:0003676_GO:0003677_GO:0005488_GO:0006139_GO:0006259_GO:0008150_GO:0008152_GO:0009987_GO:0015074_GO:0034960_GO:0043170_GO:0043283_GO:0044237_GO:0044238_GO:0044260	TPSI_1981	TY1_Copia	BC3	HCoak2	2.02361	394.838	B-up	48.0417	348.799	49.3052	96.1598	82.7675	60.8166	66.1917	95.2992	62.928	3057.82	178.937	876.352	109.48
PR_72351	copia-type polyprotein [Arabidopsis thaliana]	TPSI	NULL	TPSI_2993	TY1_Copia	BC1	HCoak2	2.02389	1755.2	B-up	147.93	1875.8	108.076	319.449	236.647	141.34	108.683	332.571	86.4616	13347.6	1032.83	4553.43	526.763
PR_78362		NULL	GO:0003674_GO:0005488_GO:0008270_GO:0043167_GO:0043169_GO:0046872_GO:0046914	NULL	NULL	NULL	NULL	2.02391	94.7524	B-up	15.396	15.3489	14.7162	16.4979	14.0416	13.5483	9.79	13.1999	14.0485	11.5451	607.607	472.752	13.2888
PR_87398	Gag-Pol [Ipomoea batatas]	TPSI	GO:0003674_GO:0003676_GO:0003677_GO:0005488_GO:0006139_GO:0006259_GO:0008150_GO:0008152_GO:0009987_GO:0015074_GO:0034960_GO:0043170_GO:0043283_GO:0044237_GO:0044238_GO:0044260	TPSI_1954	TY1_Copia	BCmono	HCoak2	2.02435	686.456	B-up	90.4954	686.848	72.1561	143.033	135.369	79.401	74.1169	146.297	70.2974	5316.91	384.618	1479.96	244.418
PR_45235	ORF g	TPSI	NULL	TPSI_2741	TY1_Copia	BC2	HCoak3	2.02465	454.958	B-up	33.3857	314.773	45.6821	124.832	177.162	68.0783	57.3448	61.7399	55.2479	619.451	729.505	3554.7	72.5486
PR_80096	polyprotein [Anopheles gambiae]	TPSI	GO:0003674_GO:0003676_GO:0003677_GO:0005488_GO:0006139_GO:0006259_GO:0008150_GO:0008152_GO:0008270_GO:0009987_GO:0015074_GO:0034960_GO:0043167_GO:0043169_GO:0043170_GO:0043283_GO:0044237_GO:0044238_GO:0044260_GO:0046872_GO:0046914	TPSI_4348	TY1_Copia	BCmono	HCoak2	2.02565	366.041	B-up	54.0698	442.278	56.8217	57.4345	78.776	73.7135	101.275	155.621	98.4321	2901.1	109.46	342.867	286.684
PR_87421	putative protein [Arabidopsis thaliana]	TPSI	NULL	TPSI_1998	TY1_Copia	BCmono	HCoak2	2.02701	522.13	B-up	49.3685	576.315	70.2366	118.135	98.5621	59.3395	60.6564	126.954	31.1616	4009.36	218.009	1258.36	111.241
PR_87550		TPSI	GO:0003674_GO:0003676_GO:0005488_GO:0008270_GO:0043167_GO:0043169_GO:0046872_GO:0046914	TPSI_3811	TY1_Copia	BC11	HCoak3	2.02833	127.184	B-up	23.8811	38.4688	21.9179	30.6424	63.6652	22.2707	48.5424	27.6298	26.9101	41.3255	295.809	986.764	25.57
PR_85489		TPSI	NULL	TPSI_2175	TY1_Copia	BC11	HCoak3	2.03408	112.74	B-up	39.565	34.8848	21.6501	38.3682	63.8936	27.4581	27.7167	17.0993	17.7167	33.6648	248.465	880.262	14.874
PR_43929	plasma membrane calcium ATPase [Chlamydomonas reinhardtii]	NULL	GO:0000166_GO:0003674_GO:0003824_GO:0005215_GO:0005388_GO:0005488_GO:0005524_GO:0005575_GO:0005623_GO:0006139_GO:0006163_GO:0006164_GO:0006753_GO:0006754_GO:0006810_GO:0006811_GO:0006812_GO:0006816_GO:0008150_GO:0008152_GO:0008324_GO:0009117_GO:0009141_GO:0009142_GO:0009144_GO:0009145_GO:0009150_GO:0009152_GO:0009165_GO:0009199_GO:0009201_GO:0009205_GO:0009206_GO:0009259_GO:0009260_GO:0009987_GO:…	NULL	NULL	NULL	NULL	2.03751	88.4225	B-up	17.0923	19.7765	15.6521	19.2495	14.8147	40.3369	22.0096	47.5323	25.4976	59.267	129.051	35.1862	704.027
PR_87714	retrotransposon element [Hyaloperonospora parasitica]	TPSI	NULL	TPSI_2894	TY1_Copia	BCmono	HCoak2	2.03772	172.288	B-up	33.2458	131.589	47.2216	83.6027	60.0059	31.0771	49.6512	38.1655	29.3198	1379.76	113.598	171.898	70.607
PR_72390	necrosis-inducing-like protein [Phytophthora sojae]	NLP	NULL	NULL	NULL	NULL	NULL	2.03803	263.746	B-up	20.3555	12.0858	8.824	10.8094	12.6592	16.87	14.841	30.5301	87.6478	1812.36	246.632	1142.23	12.8475
PR_84018		TPSI	NULL	TPSI_0085	TY1_Copia	BC13	HCoak2	2.03945	848.428	B-up	77.3109	1130.78	65.961	186.302	86.6181	58.3782	76.1016	151.338	49.9793	6529.09	320.501	2027.31	269.893
PR_75833	retrotransposon protein, putative, Ty1-copia subclass [Oryza sativa (japonica cultivar-group)]	TPSI	GO:0003674_GO:0003676_GO:0003677_GO:0005488_GO:0006139_GO:0006259_GO:0008150_GO:0008152_GO:0008270_GO:0009987_GO:0015074_GO:0034960_GO:0043167_GO:0043169_GO:0043170_GO:0043283_GO:0044237_GO:0044238_GO:0044260_GO:0046872_GO:0046914	TPSI_0885	TY1_Copia	BCmono	HCoak2	2.04048	1000.25	B-up	83.7865	1305.68	60.6998	165.485	169.26	117.956	100.013	263.654	76.4339	7784.02	455.43	2093.69	327.129
PR_86729		TPSI	NULL	TPSI_0363	TY1_Copia	BCduo	HCoak2	2.04075	873.873	B-up	50.2379	1068.79	53.6654	139.572	103.695	69.3236	58.1088	188.117	38.0522	6664.28	328.589	2336.7	261.212
PR_87214	copia-type polyprotein [Arabidopsis thaliana]	TPSI	GO:0003674_GO:0003676_GO:0003677_GO:0005488_GO:0006139_GO:0006259_GO:0008150_GO:0008152_GO:0008270_GO:0009987_GO:0015074_GO:0034960_GO:0043167_GO:0043169_GO:0043170_GO:0043283_GO:0044237_GO:0044238_GO:0044260_GO:0046872_GO:0046914	TPSI_1448	TY1_Copia	BCmono	HCoak2	2.0423	1067.23	B-up	65.0862	1196.38	64.3863	195.589	144.064	87.6594	102.602	202.68	50.9165	8164	385.171	2839.92	375.574
PR_87830	putative polyprotein [Oryza sativa (japonica cultivar-group)]	TPSI	NULL	TPSI_3178	TY1_Copia	BCmono	HCoak2	2.04584	584.544	B-up	53.0498	799.583	66.8133	84.0072	105.921	77.4955	70.2119	133.072	44.248	4587.8	203.863	1077.85	295.165
PR_84375	retrotransposon protein, putative, Ty1-copia subclass [Oryza sativa (japonica cultivar-group)]	TPSI	NULL	TPSI_0296	TY1_Copia	BC13	HCoak2	2.04728	1006.96	B-up	90.6165	1109.32	68.3509	142.597	108.168	58.1712	68.1309	194.593	37.0837	7773.59	581.921	2491.04	366.882
PR_85184	OSIGBa0134J07.9 [Oryza sativa (indica cultivar-group)]	TPSI	GO:0003674_GO:0003676_GO:0003677_GO:0005488_GO:0006139_GO:0006259_GO:0008150_GO:0008152_GO:0009987_GO:0015074_GO:0034960_GO:0043170_GO:0043283_GO:0044237_GO:0044238_GO:0044260	TPSI_4620	TY1_Copia	BCmono	HCoak2	2.0483	356.6	B-up	26.0264	354.845	39.4322	56.2993	54.9868	45.6356	78.7558	142.662	47.2508	2830.59	141.378	577.644	240.296
PR_72552	Os07g0434200 [Oryza sativa (japonica cultivar-group)]	TPSI	NULL	TPSI_3112	TY1_Copia	BC17	HCoak2	2.05189	1676.44	B-up	66.4544	2464.77	60.7793	379.485	153.434	108.995	73.0137	250.889	53.1794	13059.2	913.245	3481.26	728.998
PR_82110		NULL	GO:0003674_GO:0003824_GO:0004601_GO:0005488_GO:0005506_GO:0006950_GO:0006979_GO:0008150_GO:0016209_GO:0016491_GO:0016684_GO:0020037_GO:0042221_GO:0043167_GO:0043169_GO:0046872_GO:0046906_GO:0046914_GO:0050896	NULL	NULL	NULL	NULL	2.05216	2016.23	B-up	329.088	383.747	154.144	360.735	265.718	263.394	228.536	326.065	820.563	536.227	15347	1116.14	6079.71
PR_87731		TPSI	GO:0003674_GO:0003676_GO:0005488_GO:0008270_GO:0043167_GO:0043169_GO:0046872_GO:0046914	TPSI_5825	TY1_Copia	BC6	HCoak3	2.05522	276.919	B-up	81.6224	68.5786	76.7576	152.311	147.067	37.1523	53.3561	29.7755	47.8143	117.964	559.092	2193.28	35.1741
PR_87239		TPSI	GO:0003674_GO:0003676_GO:0003677_GO:0005488_GO:0006139_GO:0006259_GO:0008150_GO:0008152_GO:0009987_GO:0015074_GO:0034960_GO:0043170_GO:0043283_GO:0044237_GO:0044238_GO:0044260	TPSI_5765	TY1_Copia	BC3	HCoak2	2.05565	352.017	B-up	38.0544	293.488	28.1364	90.481	52.5918	35.2895	38.9326	85.6464	20.0769	2742.9	151.252	861.999	137.371
PR_48652	copia LTR rider [Solanum lycopersicum]	TPSI	NULL	TPSI_4162	TY1_Copia	BCduo	HCoak1	2.05788	109.635	B-up	34.9366	97.5755	17.7528	27.1373	39.1	26.9823	31.1432	14.4765	23.2201	91.3176	883.823	109.188	28.6056
PR_74360	PREDICTED: similar to ATP dependent transmembrane transporter protein, partial [Strongylocentrotus purpuratus]	NULL	GO:0000166_GO:0003674_GO:0003824_GO:0005488_GO:0005524_GO:0016462_GO:0016787_GO:0016817_GO:0016818_GO:0016887_GO:0017076_GO:0017111_GO:0030554_GO:0032553_GO:0032555_GO:0032559	NULL	NULL	NULL	NULL	2.05829	1431.44	B-up	347.394	246.466	239.444	307.632	137.208	269.501	131.328	169.855	124.381	425.64	5848.58	134.046	10227.2
PR_87452	putative protein [Arabidopsis thaliana]	TPSI	NULL	TPSI_4002	TY1_Copia	BC1	HCoak2	2.05898	1308.56	B-up	100.576	1378.34	58.387	227.367	178.674	129.805	82.858	294.358	60.7164	10151	540.841	3306.58	501.869
PR_85570	Os08g0389500 [Oryza sativa (japonica cultivar-group)]	TPSI	NULL	TPSI_2746	TY1_Copia	BCmono	HCoak2	2.05931	859.543	B-up	80.1565	1193.47	84.3871	178.747	110.326	126.261	95.6634	219.59	61.7127	6751.47	246.192	1748.08	278.002
PR_83230	retrotransposon protein, putative, unclassified [Oryza sativa (japonica cultivar-group)]	TPSI	NULL	TPSI_5741	TY1_Copia	BCmono	HCoak2	2.06245	1294.81	B-up	72.8011	2249.13	69.9356	189.469	97.6561	88.3536	93.2006	217.974	58.7028	10119.9	555.589	2520.5	499.361
PR_86176		TPSI	GO:0003674_GO:0003676_GO:0003677_GO:0005488_GO:0006139_GO:0006259_GO:0008150_GO:0008152_GO:0009987_GO:0015074_GO:0034960_GO:0043170_GO:0043283_GO:0044237_GO:0044238_GO:0044260	TPSI_4620	TY1_Copia	BCmono	HCoak2	2.06263	548.886	B-up	73.1471	604.161	58.5809	113.342	122.552	83.7236	71.5534	148.598	79.1728	4379.94	258.992	913.322	228.421
PR_87500	polyprotein-like [Lycopersicon chilense]	TPSI	GO:0003674_GO:0003676_GO:0005488_GO:0008270_GO:0043167_GO:0043169_GO:0046872_GO:0046914	TPSI_2265	TY1_Copia	BC6	HCoak3	2.06846	141.404	B-up	47.7044	74.3159	30.9769	32.6751	62.8448	26.0799	29.5219	29.1793	33.1508	43.3478	277.507	1129.35	21.5909
PR_43016	ORF g	TPSI	NULL	TPSI_1669	TY1_Copia	BC2	HCoak3	2.06925	750.4	B-up	95.5936	575.215	75.9903	185.434	252.337	103.219	92.6518	92.0377	91.9307	860.474	1267.24	5986	77.0844
PR_86678		TPSI	NULL	TPSI_4836	TY1_Copia	BCmono	HCoak3	2.07139	223.613	B-up	37.267	78.9283	37.3797	92.4689	104.916	42.8956	38.7255	37.4862	29.9415	105.255	491.925	1774.99	34.7785
PR_83592	necrosis-inducing-like protein [Phytophthora sojae]	NLP	NULL	NULL	NULL	NULL	NULL	2.07635	416.105	B-up	17.6586	16.3313	17.241	16.4773	15.7252	22.7429	18.3427	54.9785	109.63	2419.34	226.862	2456.14	17.899
PR_87208	PREDICTED: similar to retrotransposon protein, putative, unclassified [Nasonia vitripennis]	TPSI	NULL	TPSI_1434	TY1_Copia	BCmono	HCoak2	2.07775	1385.89	B-up	103.987	1732.16	62.2073	208.58	200.669	88.2431	90.1834	294.043	62.1276	10849.3	451.449	3375.77	497.751
PR_87642	copia-like retrotransposable element [Arabidopsis thaliana]	TPSI	GO:0003674_GO:0003676_GO:0003677_GO:0005488_GO:0006139_GO:0006259_GO:0008150_GO:0008152_GO:0009987_GO:0015074_GO:0034960_GO:0043170_GO:0043283_GO:0044237_GO:0044238_GO:0044260	TPSI_2692	TY1_Copia	BC4	HCoak3	2.07833	149.285	B-up	40.4528	50.5621	20.5651	52.7629	58.1257	29.0736	36.1021	25.5214	19.122	91.381	296.25	1196.02	24.7645
PR_87656	Os08g0230100 [Oryza sativa (japonica cultivar-group)]	TPSI	NULL	TPSI_2727	TY1_Copia	BCmono	HCoak2	2.08033	887.068	B-up	32.3936	1360.7	40.2505	125.319	56.6177	78.3819	55.5968	160.498	26.5486	6911.92	246.193	2163.77	273.697
PR_49384		TPSI	NULL	TPSI_4344	TY1_Copia	BC12	HCoak2	2.08045	1456.41	B-up	84.8498	1516.5	45.7852	307.823	131.053	108.134	86.8117	358.933	46.2714	11304.6	515.043	4015.63	411.909
PR_43359	ORF g	TPSI	NULL	TPSI_1733	TY1_Copia	BC2	HCoak3	2.08124	521.292	B-up	103.408	346.791	84.9052	124.528	163.036	86.8322	64.7152	60.9757	61.9277	740.422	668.756	4199.36	71.1354
PR_87406	probable retroelement pol polyprotein [imported] - Arabidopsis thaliana	TPSI	GO:0003674_GO:0003676_GO:0003677_GO:0005488_GO:0006139_GO:0006259_GO:0008150_GO:0008152_GO:0009987_GO:0015074_GO:0034960_GO:0043170_GO:0043283_GO:0044237_GO:0044238_GO:0044260	TPSI_1969	TY1_Copia	BCmono	HCoak3	2.08189	184.748	B-up	30.0131	71.1848	24.7253	52.1392	92.2311	26.4139	39.0791	37.5362	35.3934	81.4953	411.098	1472.33	28.0823
PR_87844		TPSI	GO:0003674_GO:0003676_GO:0003677_GO:0005488_GO:0006139_GO:0006259_GO:0008150_GO:0008152_GO:0009987_GO:0015074_GO:0034960_GO:0043170_GO:0043283_GO:0044237_GO:0044238_GO:0044260	TPSI_3189	TY1_Copia	BCmono	HCoak2	2.08698	1235.61	B-up	53.5408	1378.7	62.8367	290.63	147.823	89.4065	88.0848	358.061	111.43	9776.3	433.582	2861.78	410.769
PR_86862	retrotransposon protein, putative, Ty1-copia subclass [Oryza sativa (japonica cultivar-group)]	TPSI	NULL	TPSI_5434	TY1_Copia	BCmono	HCoak2	2.08732	514.126	B-up	51.6213	506.864	36.9649	100.727	58.2309	46.451	39.8956	93.7646	31.2048	4008.65	165.746	1416.55	126.955
PR_85490	putative polyprotein [Lycopersicon esculentum]	TPSI	NULL	TPSI_2178	TY1_Copia	BCduo	HCoak2	2.08916	873.789	B-up	75.5617	1225.78	55.1299	178.91	147.355	87.3089	102.263	243.934	50.2209	7013.91	350.308	1467.45	361.117
PR_39156		TPSI	NULL	TPSI_0084	TY1_Copia	BC12	HCoak2	2.09273	1422.37	B-up	94.8861	1207.07	58.7388	286.903	177.463	109.637	106.992	332.729	117.837	11213.3	689.32	3653.22	442.762
PR_72506	copia-type polyprotein [Arabidopsis thaliana]	TPSI	NULL	TPSI_4054	TY1_Copia	BC1	HCoak2	2.09275	1224.48	B-up	93.1701	1421.06	51.9171	231.592	136.609	73.7778	58.7473	219.907	89.352	9661.51	549.689	2987.35	343.614
PR_87855		TPSI	GO:0003674_GO:0003676_GO:0005488_GO:0008270_GO:0043167_GO:0043169_GO:0046872_GO:0046914	TPSI_2565	TY1_Copia	BC6	HCoak3	2.09409	213.764	B-up	60.592	45.1025	59.5011	72.0643	93.1809	41.4672	65.1694	46.224	80.5516	90.8346	326.168	1744.65	53.4251
PR_72350	copia-type polyprotein [Arabidopsis thaliana]	TPSI	NULL	TPSI_2882	TY1_Copia	BC1	HCoak2	2.09414	1465.19	B-up	74.5338	1250.67	48.3997	240.056	168.036	59.8759	92.6725	229.238	59.5281	11396.5	698.738	4238.17	491.051
PR_87706	retrotransposon protein, putative, unclassified [Oryza sativa (japonica cultivar-group)]	TPSI	NULL	TPSI_2869	TY1_Copia	BCmono	HCoak2	2.09696	1070.52	B-up	126.461	1074.28	90.5566	209.877	162.13	132.045	106.793	191.41	49.2544	8486.19	293.465	2616.93	377.359
PR_83922		NULL	GO:0003674_GO:0005488_GO:0005515_GO:0008270_GO:0043167_GO:0043169_GO:0046872_GO:0046914	NULL	NULL	NULL	NULL	2.09742	340.673	B-up	60.8369	40.3022	30.5011	69.5294	60.0239	44.4273	60.9875	41.5678	41.7804	99.3176	2532.56	44.4241	1302.48
PR_72348		TPSI	NULL	TPSI_2745	TY1_Copia	BC1	HCoak2	2.09867	900.986	B-up	65.1271	1105.97	51.7574	122.415	94.6616	84.1615	58.2847	206.31	44.8141	7169.04	351.951	2023.01	335.319
PR_50525		TPSI	NULL	TPSI_4744	TY1_Copia	BC12	HCoak2	2.10288	1594.7	B-up	105.869	1354.91	72.4992	351.307	215.702	147.73	125.895	460.457	64.5071	12627.2	637.658	4113.14	454.165
PR_87552	Gag-Pol [Ipomoea batatas]	TPSI	NULL	TPSI_2405	TY1_Copia	BCduo	HCoak2	2.10353	837.588	B-up	80.6932	947.352	34.2392	145.084	88.1396	69.9991	61.728	188.739	72.9109	6675.34	301.767	1939.23	283.423
PR_72307	putative gag-pol polyprotein [Oryza sativa]	TPSI	NULL	TPSI_4620	TY1_Copia	BC1	HCoak2	2.10406	613.976	B-up	67.4521	893.885	71.9332	120.961	89.2127	35.2127	81.6371	143.044	69.4509	4958.69	244.088	1024.71	181.406
PR_45277	copia-type polyprotein [Arabidopsis thaliana]	TPSI	NULL	TPSI_2779	TY1_Copia	BC1	HCoak2	2.10993	1893.91	B-up	143.074	1964.56	74.2897	291.802	239.684	118.762	108.51	326.309	70.3436	15086.6	926.852	4597.04	673.034
PR_72467		TPSI	NULL	TPSI_0726	TY1_Copia	BC1	HCoak2	2.11422	1647.8	B-up	120.689	1795.23	76.5339	273.881	201.3	104.196	105.129	254.812	46.4589	13130.4	656.2	4053.24	603.319
PR_73683		NULL	GO:0003674_GO:0005215_GO:0005575_GO:0005623_GO:0006810_GO:0006857_GO:0008150_GO:0015833_GO:0016020_GO:0044464_GO:0051179_GO:0051234	NULL	NULL	NULL	NULL	2.11476	157.242	B-up	19.3302	30.9364	29.6149	22.7453	38.463	23.4369	31.826	16.7717	20.9019	18.7832	591.478	1184.05	15.8103
PR_87688		TPSI	NULL	TPSI_2834	TY1_Copia	BCduo	HCoak3	2.11547	178.646	B-up	34.0005	65.6393	31.5871	44.657	76.6597	24.451	32.0982	34.2629	61.5125	61.0615	394.36	1446.08	16.0196
PR_71128	putative polyprotein [Oryza sativa (japonica cultivar-group)]	TPSI	NULL	TPSI_4054	TY1_Copia	BC1	HCoak2	2.12258	1533.2	B-up	90.3943	1798.89	89.088	241.458	225.937	120.689	73.5895	320.825	79.3875	12331	587.993	3479.2	493.131
PR_87315		TPSI	GO:0003674_GO:0003676_GO:0003677_GO:0005488_GO:0006139_GO:0006259_GO:0008150_GO:0008152_GO:0009987_GO:0015074_GO:0034960_GO:0043170_GO:0043283_GO:0044237_GO:0044238_GO:0044260	TPSI_0273	TY1_Copia	BC3	HCoak2	2.12612	343.005	B-up	38.4557	430.742	24.3528	52.6397	54.8678	35.6758	30.3148	82.4219	32.2321	2790.15	126.543	653.896	106.771
PR_87149	retrotransposon protein, putative, unclassified [Oryza sativa (japonica cultivar-group)]	TPSI	NULL	TPSI_1315	TY1_Copia	BCmono	HCoak2	2.12852	804.157	B-up	48.7632	910.731	35.9285	125.309	86.6197	53.3245	37.4776	155.136	67.5525	6453.2	297.006	1954.7	228.291
PR_78099		NULL	GO:0003674_GO:0005488_GO:0008270_GO:0043167_GO:0043169_GO:0046872_GO:0046914	NULL	NULL	NULL	NULL	2.1328	95.3965	B-up	23.2611	23.1835	20.5695	23.2845	31.8776	41.6351	38.4031	76.4702	52.3065	56.5338	28.7747	25.7815	798.073
PR_87359	retrotransposon protein, putative, unclassified [Oryza sativa (japonica cultivar-group)]	TPSI	NULL	TPSI_1823	TY1_Copia	BCmono	HCoak2	2.13509	654.921	B-up	49.7638	572.585	29.9221	151.707	111.549	51.2417	70.3232	144.81	28.8141	5326.08	304.026	1444.62	228.527
PR_79530		NULL	GO:0003674_GO:0003824_GO:0005488_GO:0016491_GO:0043167_GO:0043169_GO:0046872_GO:0046914	NULL	NULL	NULL	NULL	2.137	108.264	B-up	56.334	14.3402	64.9172	27.7367	26.4531	44.4766	23.5174	60.3497	37.362	74.9482	14.9488	55.0014	907.048
PR_87066	retrotransposon protein, putative, Ty1-copia subclass [Oryza sativa (japonica cultivar-group)]	TPSI	NULL	TPSI_1177	TY1_Copia	BC1	HCoak2	2.14215	951.475	B-up	70.5364	865.146	50.295	189.053	126.687	82.7423	38.8085	264.286	46.9998	7727.46	362.295	2221.96	322.903
PR_81585		NULL	GO:0003674_GO:0005215_GO:0005575_GO:0005623_GO:0006810_GO:0008150_GO:0016020_GO:0044464_GO:0051179_GO:0051234	NULL	NULL	NULL	NULL	2.14628	327.397	B-up	17.0785	31.4964	32.9351	30.6472	29.7003	60.5227	47.6674	25.1204	40.3192	53.0136	2539.18	204.858	1143.63
PR_72451		TPSI	NULL	TPSI_0302	TY1_Copia	BC1	HCoak2	2.15359	1144.97	B-up	79.8578	1037.16	35.5067	195.167	91.6258	60.761	82.1999	181.81	44.5415	9248.26	413.5	3006.94	407.25
PR_83681		NULL	GO:0003674_GO:0005488_GO:0005509_GO:0043167_GO:0043169_GO:0046872	NULL	NULL	NULL	NULL	2.15437	289.001	B-up	63.6985	64.7443	49.8404	37.7051	45.2769	127.736	65.4032	86.1573	90.4859	112.169	46.046	573.834	2393.91
PR_71113	retrotransposon protein, putative, Ty1-copia subclass [Oryza sativa (japonica cultivar-group)]	TPSI	GO:0003674_GO:0003676_GO:0003677_GO:0005488_GO:0006139_GO:0006259_GO:0008150_GO:0008152_GO:0009987_GO:0015074_GO:0034960_GO:0043170_GO:0043283_GO:0044237_GO:0044238_GO:0044260	TPSI_3446	TY1_Copia	BCmono	HCoak2	2.15712	871.935	B-up	80.1991	1079.13	45.3359	157.659	84.0308	62.8222	50.0641	187.996	25.568	7157.17	300.743	1792.45	311.979
PR_78184	PREDICTED: similar to soluble epoxide hydrolase [Equus caballus]	NULL	GO:0003674_GO:0003824_GO:0016787	NULL	NULL	NULL	NULL	2.15726	1839.13	B-up	593.715	360.893	481.418	412.87	516.985	360.884	298.739	102.807	187.722	163.93	14891.9	525.271	5011.65
PR_87554	retrotransposon protein, putative, unclassified [Oryza sativa (japonica cultivar-group)]	TPSI	NULL	TPSI_2412	TY1_Copia	BCmono	HCoak2	2.15787	635.483	B-up	126.128	740.406	90.8231	107.309	121.004	125.689	67.8264	207.522	61.6678	5313.54	196.032	824.611	278.712
PR_87316		TPSI	GO:0003674_GO:0003676_GO:0003677_GO:0005488_GO:0006139_GO:0006259_GO:0008150_GO:0008152_GO:0009987_GO:0015074_GO:0034960_GO:0043170_GO:0043283_GO:0044237_GO:0044238_GO:0044260	TPSI_1705	TY1_Copia	BC3	HCoak2	2.15889	384.072	B-up	42.4515	350.459	25.7494	40.2937	50.8365	25.09	38.6373	73.1794	25.8386	3139.55	173.967	905.823	101.057
PR_87675		TPSI	NULL	TPSI_2783	TY1_Copia	BC1	HCoak2	2.15953	811.262	B-up	42.9634	998.089	26.1884	96.4141	79.7865	46.6377	56.8432	210.464	41.3783	6652.41	326.569	1723.34	245.327
PR_84110		NULL	NULL	NULL	NULL	NULL	NULL	2.16502	88.51	B-up	14.6723	30.5396	26.2777	26.9818	28.0678	42.6072	16.0825	25.6498	16.2158	24.9067	50.7561	99.7309	748.142
PR_75820	retrotransposon protein, putative, Ty1-copia subclass [Oryza sativa (japonica cultivar-group)]	TPSI	NULL	TPSI_0882	TY1_Copia	BCmono	HCoak2	2.17581	1168.7	B-up	67.799	1168.1	42.1694	179.203	128.213	78.4439	70.9235	211.185	76.3483	9596.36	387.915	2821.8	364.677
PR_72520		TPSI	NULL	TPSI_1797	TY1_Copia	BC1	HCoak2	2.17589	1332.95	B-up	106.534	1374.65	53.6822	208.685	123.551	98.1873	90.9936	238.746	42.889	10947.5	478.038	3194.09	370.869
PR_45501		TPSI	NULL	TPSI_2890	TY1_Copia	BC1	HCoak2	2.18141	1363.55	B-up	73.9318	1548.91	29.5586	171.148	76.3568	51.4618	39.0308	219.737	32.12	11141.3	490.614	3492.13	359.89
PR_72144	Multidrug resistance protein 1 (ATP-binding cassette sub-family B member 1) (P-glycoprotein 1) (CD243 antigen)	NULL	GO:0000166_GO:0003674_GO:0003824_GO:0005215_GO:0005488_GO:0005524_GO:0005575_GO:0005623_GO:0006810_GO:0008150_GO:0015399_GO:0015405_GO:0016020_GO:0016021_GO:0016462_GO:0016787_GO:0016817_GO:0016818_GO:0016820_GO:0016887_GO:0017076_GO:0017111_GO:0022804_GO:0022857_GO:0030554_GO:0031224_GO:0032553_GO:0032555_GO:0032559_GO:0042623_GO:0042626_GO:0043492_GO:0044425_GO:0044464_GO:0051179_GO:0051234	NULL	NULL	NULL	NULL	2.18564	1058.83	B-up	272.628	466.393	614.013	295.201	339.862	341.179	387.323	175.84	154.196	194.736	223.008	1285.7	9014.64
PR_78007		NULL	GO:0003674_GO:0004871_GO:0060089	NULL	NULL	NULL	NULL	2.19037	79.4444	B-up	20.1834	17.5987	29.8194	19.1341	29.2177	32.5332	20.3304	30.68	15.9739	31.0527	25.7234	80.7907	679.739
PR_87644	retrotransposon protein, putative, Ty1-copia subclass [Oryza sativa (japonica cultivar-group)]	TPSI	GO:0003674_GO:0003676_GO:0005488_GO:0008270_GO:0043167_GO:0043169_GO:0046872_GO:0046914	TPSI_2697	TY1_Copia	BCmono	HCoak2	2.20402	453.392	B-up	59.0973	423.564	28.5318	101.972	64.4011	49.2894	44.3233	105.829	23.6234	3829.95	190.41	847.875	125.229
PR_85793		TPSI	GO:0003674_GO:0003676_GO:0003677_GO:0005488_GO:0006139_GO:0006259_GO:0008150_GO:0008152_GO:0009987_GO:0015074_GO:0034960_GO:0043170_GO:0043283_GO:0044237_GO:0044238_GO:0044260	TPSI_3582	gypsy	BCmono	HCoak3	2.20753	113.251	B-up	41.5106	53.7898	51.9664	60.1189	40.9746	51.1277	35.6992	34.7187	24.2884	28.5088	41.9143	978.548	29.0985
PR_77710		NULL	GO:0003674_GO:0003824_GO:0005488_GO:0005506_GO:0016491_GO:0043167_GO:0043169_GO:0046872_GO:0046914	NULL	NULL	NULL	NULL	2.21783	1100.44	B-up	130.393	84.7593	164.982	232.023	351.762	159.861	103.786	57.6466	59.4443	86.2216	4035.56	8752.37	86.9135
PR_97292	PrAvh_97	PrAvh_97	NULL	NULL	NULL	NULL	NULL	2.22937	577.547	B-up	227.343	159.992	176.13	231.966	196.334	239.913	186.225	243.797	244.322	84.0851	342.985	5032.99	142.021
PR_75630		NULL	GO:0003674_GO:0004871_GO:0060089	NULL	NULL	NULL	NULL	2.23105	123.894	B-up	49.1628	41.0501	44.8473	56.4345	58.078	29.6224	38.2015	43.5727	38.1101	49.1669	43.0182	38.2836	1081.07
PR_82623		NULL	NULL	NULL	NULL	NULL	NULL	2.23628	103.3	B-up	25.0984	23.0355	38.7649	23.0668	34.5944	39.9631	19.7467	34.1599	21.1653	40.292	72.165	69.2742	901.579
PR_72011	tubby like protein 2 [Bos taurus]	NULL	NULL	NULL	NULL	NULL	NULL	2.2382	444.012	B-up	107.288	82.7815	258.467	166.987	201.884	165.184	87.6594	135.889	116.562	113.226	225.682	229.213	3881.33
PR_83926		NULL	NULL	NULL	NULL	NULL	NULL	2.25123	221.05	B-up	122.883	46.7833	37.046	57.0219	65.5552	55.1476	48.0059	45.4563	81.7755	60.272	185.291	1938.94	129.467
PR_79419		NULL	NULL	NULL	NULL	NULL	NULL	2.25184	751.605	B-up	40.8872	84.6766	73.0992	32.4246	48.9481	119.601	135.113	783.572	251.076	1388.49	91.0104	252.359	6469.61
PR_87524		TPSI	NULL	TPSI_2343	TY1_Copia	BCduo	HCoak3	2.2537	361.706	B-up	59.8836	106.992	80.1722	72.6588	128.176	54.4303	77.7017	65.9198	52.0014	134.673	702.691	3125.16	41.7239
PR_87324	polyprotein [Anopheles gambiae]	TPSI	GO:0003674_GO:0003676_GO:0003677_GO:0005488_GO:0006139_GO:0006259_GO:0008150_GO:0008152_GO:0009987_GO:0015074_GO:0034960_GO:0043170_GO:0043283_GO:0044237_GO:0044238_GO:0044260	TPSI_1722	TY1_Copia	BC16	HCoak2	2.26256	839.817	B-up	119.098	792.855	117.116	128.107	165.183	129.951	111.666	175.694	132.453	7344	247.811	1097.92	355.771
PR_87591	gag-pol polyprotein [Populus deltoides]	TPSI	NULL	TPSI_2531	TY1_Copia	BCmono	HCoak2	2.26511	1008.17	B-up	99.5875	1172.88	60.8048	163.283	141.589	68.7852	81.7965	195.35	52.6572	8742.21	292.408	1701.65	333.167
PR_72478	alpha-tubulin [Phytophthora cinnamomi]	NULL	GO:0000166_GO:0003674_GO:0003824_GO:0003924_GO:0005198_GO:0005488_GO:0005525_GO:0005575_GO:0005622_GO:0005623_GO:0005856_GO:0005874_GO:0006461_GO:0006810_GO:0007017_GO:0007018_GO:0008150_GO:0009987_GO:0010926_GO:0015630_GO:0016043_GO:0016462_GO:0016787_GO:0016817_GO:0016818_GO:0017076_GO:0017111_GO:0019001_GO:0022607_GO:0030705_GO:0032553_GO:0032555_GO:0032561_GO:0032991_GO:0034621_GO:0034622_GO:…	NULL	NULL	NULL	NULL	2.26953	85.7568	B-up	11.3602	14.9951	13.0407	12.2724	17.5839	17.7725	18.1796	27.289	24.8381	21.7521	750.136	44.5957	141.023
PR_79695		NULL	NULL	NULL	NULL	NULL	NULL	2.27914	644.643	B-up	231.807	268.038	193.554	194.279	131.868	192.905	170.981	285.689	187.053	244.16	169.358	380.919	5729.75
PR_85886		NULL	NULL	NULL	NULL	NULL	NULL	2.29073	104.442	B-up	44.5593	44.9488	32.8984	41.9703	47.7958	41.2321	25.7485	22.6254	20.9614	30.3098	932.667	43.0622	28.9711
PR_87410		TPSI	GO:0003674_GO:0003676_GO:0003677_GO:0005488_GO:0006139_GO:0006259_GO:0008150_GO:0008152_GO:0009987_GO:0015074_GO:0034960_GO:0043170_GO:0043283_GO:0044237_GO:0044238_GO:0044260	TPSI_1975	TY1_Copia	BC3	HCoak2	2.29483	507.97	B-up	33.641	443.118	27.931	67.7397	57.8576	31.2576	67.8858	109.82	77.5608	4470.31	217.861	859.962	138.663
PR_87634	retrotransposon protein, putative, Ty1-copia subclass [Oryza sativa (japonica cultivar-group)]	TPSI	NULL	TPSI_2640	TY1_Copia	BCmono	HCoak2	2.30683	815.104	B-up	39.1987	912.995	26.0836	119.681	78.1445	44.1803	31.4202	131.585	26.7786	7155.16	220.708	1552.6	257.808
PR_82605		NULL	NULL	NULL	NULL	NULL	NULL	2.31351	416.492	B-up	119.284	164.235	88.0868	77.3778	104.697	115.2	93.4051	147.291	191.065	179.252	177.583	205.541	3751.39
PR_82777	Os05g0408300 [Oryza sativa (japonica cultivar-group)]	NULL	GO:0000166_GO:0003674_GO:0003824_GO:0005488_GO:0005524_GO:0016462_GO:0016787_GO:0016817_GO:0016818_GO:0016887_GO:0017076_GO:0017111_GO:0030554_GO:0032553_GO:0032555_GO:0032559	NULL	NULL	NULL	NULL	2.31667	510.982	B-up	102.305	163.002	251.701	207.307	171.782	197.175	179.707	80.2578	79.0136	89.9062	470.339	54.3344	4595.94
PR_82226		NULL	NULL	NULL	NULL	NULL	NULL	2.32296	358.237	B-up	142.708	119.81	133.193	95.6387	139.366	99.1706	89.3428	138.376	126.778	126.884	120.89	84.7094	3240.22
PR_87023	putative polyprotein [Oryza sativa (japonica cultivar-group)]	TPSI	GO:0003674_GO:0003676_GO:0005488_GO:0008270_GO:0043167_GO:0043169_GO:0046872_GO:0046914	TPSI_1018	TY1_Copia	BCmono	HCoak2	2.32697	508.155	B-up	42.3486	416.556	37.9283	65.985	83.5618	44.6279	40.4681	127.687	37.9695	4542.37	229.673	784.257	152.58
PR_74699	Os10g0130700 [Oryza sativa (japonica cultivar-group)]	TPSI	GO:0003674_GO:0003676_GO:0003677_GO:0005488_GO:0006139_GO:0006259_GO:0008150_GO:0008152_GO:0008270_GO:0009987_GO:0015074_GO:0034960_GO:0043167_GO:0043169_GO:0043170_GO:0043283_GO:0044237_GO:0044238_GO:0044260_GO:0046872_GO:0046914	TPSI_5891	TY1_Copia	BCmono	HCoak2	2.335	794.729	B-up	65.0502	819.969	26.2129	103.47	66.4747	48.785	46.4042	166.815	32.1748	7088.19	228.206	1373.35	266.369
PR_81013		NULL	GO:0003674_GO:0005488_GO:0008270_GO:0043167_GO:0043169_GO:0046872_GO:0046914	NULL	NULL	NULL	NULL	2.33789	161.468	B-up	50.2441	59.6776	61.1067	86.0846	56.4481	45.6099	27.9466	57.7921	46.2641	61.6543	37.2232	40.7491	1468.29
PR_75729	retrotransposon protein, putative, unclassified [Oryza sativa (japonica cultivar-group)]	TPSI	GO:0003674_GO:0003676_GO:0003677_GO:0005488_GO:0006139_GO:0006259_GO:0008150_GO:0008152_GO:0008270_GO:0009987_GO:0015074_GO:0034960_GO:0043167_GO:0043169_GO:0043170_GO:0043283_GO:0044237_GO:0044238_GO:0044260_GO:0046872_GO:0046914	TPSI_0868	TY1_Copia	BCmono	HCoak2	2.33846	415.152	B-up	52.7875	446.905	30.0523	109.602	39.7322	24.229	46.8781	105.817	11.5246	3742.17	129.043	440.083	218.155
PR_74538		NULL	GO:0005575_GO:0005576	NULL	NULL	NULL	NULL	2.34714	213.905	B-up	69.5403	42.6097	54.296	50.7519	69.5327	70.3303	60.8817	57.0531	89.0316	51.6552	159.151	55.5994	1950.33
PR_86207		TPSI	GO:0003674_GO:0003676_GO:0003677_GO:0005488_GO:0006139_GO:0006259_GO:0008150_GO:0008152_GO:0008270_GO:0009987_GO:0015074_GO:0034960_GO:0043167_GO:0043169_GO:0043170_GO:0043283_GO:0044237_GO:0044238_GO:0044260_GO:0046872_GO:0046914	TPSI_4736	TY1_Copia	BCmono	HCoak2	2.35492	802.981	B-up	72.1995	785.489	47.8771	143.101	104.992	83.3742	67.4359	103.328	61.7248	7259.98	256.278	1148.45	304.531
PR_79580	PREDICTED: similar to plasma membrane calcium ATPase 2 isoform b isoform 26 [Canis familiaris]	NULL	GO:0000166_GO:0003674_GO:0003824_GO:0005215_GO:0005388_GO:0005488_GO:0005524_GO:0005575_GO:0005623_GO:0006139_GO:0006163_GO:0006164_GO:0006753_GO:0006754_GO:0006810_GO:0006811_GO:0006812_GO:0006816_GO:0008150_GO:0008152_GO:0008324_GO:0009117_GO:0009141_GO:0009142_GO:0009144_GO:0009145_GO:0009150_GO:0009152_GO:0009165_GO:0009199_GO:0009201_GO:0009205_GO:0009206_GO:0009259_GO:0009260_GO:0009987_GO:…	NULL	NULL	NULL	NULL	2.35542	190.242	B-up	45.2491	47.0249	47.724	46.1073	57.2589	41.1118	65.3875	75.804	92.5845	93.2428	20.1899	100.98	1740.49
PR_85860	retrotransposon protein, putative, unclassified [Oryza sativa (japonica cultivar-group)]	TPSI	NULL	TPSI_3721	TY1_Copia	BC13	HCoak2	2.36125	813.382	B-up	34.6054	605.003	27.3609	107.486	51.5845	51.4302	51.0015	155.98	25.7931	7305.53	286.487	1620.21	251.489
PR_87910		TPSI	NULL	TPSI_3295	TY1_Copia	BCduo	HCoak2	2.37553	1480.51	B-up	95.3984	1209.66	131.49	249.103	173.223	109.587	83.3405	239.578	45.4594	13401.2	354.359	2790.36	363.911
PR_79441		NULL	NULL	NULL	NULL	NULL	NULL	2.3836	273.017	B-up	62.7743	55.5539	70.995	73.6411	69.9043	56.5756	78.8899	127.601	170.589	66.9972	37.283	155.068	2523.35
PR_87368	putative polyprotein [Oryza sativa (japonica cultivar-group)]	TPSI	NULL	TPSI_1845	TY1_Copia	BC1	HCoak2	2.40431	1576.03	B-up	65.5082	1439.21	41.423	172.185	119.596	64.6326	52.63	192.473	27.697	14361.8	376.187	3200.11	374.925
PR_83942	NADH:flavin oxidoreductase Old Yellow Enzyme family-like [Synechococcus elongatus PCC 7942]	NULL	GO:0000166_GO:0003674_GO:0003824_GO:0005488_GO:0010181_GO:0016491_GO:0048037_GO:0050662	NULL	NULL	NULL	NULL	2.40471	88.1139	B-up	25.718	19.4837	34.1704	24.4835	20.367	52.154	20.4284	22.5734	40.9698	25.1508	821.378	19.4222	19.1814
PR_97425	PrAvh_230	PrAvh_230	NULL	NULL	NULL	NULL	NULL	2.4168	91.1308	B-up	35.1559	16.8447	16.1813	54.1751	10.6191	16.9335	15.8773	12.5551	15.9713	15.3019	851.326	70.0874	53.6714
PR_85674		NULL	NULL	NULL	NULL	NULL	NULL	2.44939	640.843	B-up	287.908	193.322	134.4	228.327	213.127	257.258	174.177	135.064	236.76	20.0373	6068.8	362.515	19.2649
PR_86813		NULL	NULL	NULL	NULL	NULL	NULL	2.49632	289.178	B-up	24.3374	18.5823	17.5047	24.7383	14.1351	13.8417	24.0483	21.1515	27.2115	33.9565	2669.65	853.882	16.2749
PR_97559	PrAvh_381	PrAvh_381	NULL	NULL	NULL	NULL	NULL	2.52157	293.819	B-up	105.638	25.8071	39.7061	44.4541	40.3791	109.215	55.1734	114.919	157.465	38.2538	88.0306	2856.24	144.364
PR_71776	aquaglyceroporin [Osmerus mordax]	NULL	GO:0003674_GO:0005215_GO:0005575_GO:0005623_GO:0006810_GO:0008150_GO:0016020_GO:0044464_GO:0051179_GO:0051234	NULL	NULL	NULL	NULL	2.55792	267.136	B-up	71.153	68.8031	51.3148	68.4703	75.2499	38.8196	61.1619	46.7902	87.2243	42.755	74.0508	154.765	2632.21
PR_83722	GAS-3 homologue [Candida glabrata]	NULL	NULL	NULL	NULL	NULL	NULL	2.56711	128.611	B-up	22.6357	32.5237	28.4413	44.3891	42.9584	30.794	31.572	44.1227	15.1036	26.2741	29.1256	52.1877	1271.81
PR_87686		NULL	NULL	NULL	NULL	NULL	NULL	2.56962	162.041	B-up	19.8093	28.402	45.6107	28.3165	31.9865	68.1585	40.3698	29.821	17.745	43.0086	39.6465	111.543	1602.11
PR_74537		NULL	GO:0005575_GO:0005576	NULL	NULL	NULL	NULL	2.60974	251.796	B-up	40.3503	26.3384	49.2669	52.5954	54.8849	42.9453	65.9153	60.4076	92.0146	51.1066	161.194	50.9113	2525.42
PR_82687		NULL	NULL	NULL	NULL	NULL	NULL	2.6308	96.8653	B-up	39.8728	21.608	23.7011	20.5475	26.5032	26.7487	26.4208	19.5943	18.5666	979.414	17.009	21.0941	18.1695
PR_77759		NULL	NULL	NULL	NULL	NULL	NULL	2.63449	121.72	B-up	24.7573	19.6428	18.9931	18.612	27.7735	30.9859	18.3819	34.1422	23.2866	29.786	64.1202	40.0935	1231.79
PR_84957		NULL	NULL	NULL	NULL	NULL	NULL	2.63522	102.026	B-up	24.3212	26.1857	22.3435	17.5931	14.0497	26.2659	22.6495	18.8849	16.5479	21.5774	25.656	57.5537	1032.71
PR_76316		NULL	NULL	NULL	NULL	NULL	NULL	2.65578	348.634	B-up	25.789	60.1957	108.568	27.9055	41.6819	73.3638	81.5443	77.7247	35.4872	113.764	50.2117	287.991	3548.01
PR_83006		NULL	GO:0005575_GO:0005576_GO:0006950_GO:0006952_GO:0008150_GO:0009405_GO:0044403_GO:0044419_GO:0050896_GO:0051704	NULL	NULL	NULL	NULL	2.65667	91.0968	B-up	14.8421	22.3614	20.5771	25.4734	24.8519	27.7512	15.0703	21.6647	14.7699	21.0621	20.3424	26.1542	929.338
PR_81864		NULL	NULL	NULL	NULL	NULL	NULL	2.70651	96.1719	B-up	24.8805	18.0144	14.9792	13.0545	16.3712	28.4062	16.955	19.0749	28.7704	21.3982	21.1	29.5674	997.662
PR_48235	putative gag-pol protein [Oryza sativa (japonica cultivar-group)]	TPSI	NULL	TPSI_3963	TY1_Copia	BCmono	HCoak1	2.71567	927.2	B-up	10.878	28.3347	9.6171	18.3862	10.8263	18.6532	10.3114	11.9172	15.9997	405.75	9468.73	1940.09	104.118
PR_86534	aquaglyceroporin [Osmerus mordax]	NULL	GO:0003674_GO:0005215_GO:0005575_GO:0005623_GO:0006810_GO:0008150_GO:0016020_GO:0044464_GO:0051179_GO:0051234	NULL	NULL	NULL	NULL	2.73117	381.706	B-up	87.0954	53.1694	53.1352	77.1919	64.5389	49.2608	55.3615	53.6371	66.3294	51.827	98.7876	263.796	3988.05
PR_84834		NULL	GO:0003674_GO:0003824_GO:0004553_GO:0005975_GO:0008150_GO:0008152_GO:0016787_GO:0016798_GO:0044238	NULL	NULL	NULL	NULL	2.75027	153.715	B-up	23.7441	27.8113	34.6663	27.9007	27.7874	39.9394	25.0202	30.3369	34.8104	26.5979	49.8705	31.8053	1618
PR_85438		NULL	NULL	NULL	NULL	NULL	NULL	2.81062	231.054	B-up	33.9951	52.4155	33.149	20.7977	18.2109	31.4024	19.9406	34.5016	22.7835	34.5077	2474.7	204.38	22.9207
PR_76571		NULL	NULL	NULL	NULL	NULL	NULL	2.81909	910.201	B-up	152.275	191.132	165.869	131.453	286.949	131.607	123.425	232.057	149.962	289.598	59.1755	122.962	9796.15
PR_73688		NULL	NULL	NULL	NULL	NULL	NULL	2.83275	676.189	B-up	30.6038	18.683	12.3995	24.9179	21.499	29.3946	26.1271	33.0675	32.5877	60.6378	7218.41	47.6136	1234.52
PR_83988		NULL	NULL	NULL	NULL	NULL	NULL	2.84269	274.969	B-up	35.9608	47.4562	43.7439	47.0424	65.7239	46.3451	56.2398	64.098	74.128	39.7667	38.9812	32.74	2982.37
PR_82388		NULL	NULL	NULL	NULL	NULL	NULL	2.84401	159.1	B-up	26.0665	18.6657	32.7632	33.7891	20.8027	28.1565	22.1538	29.5505	33.9375	36.66	19.0134	40.3698	1726.37
PR_82134	predicted protein [Physcomitrella patens subsp. patens]	NULL	GO:0000166_GO:0003674_GO:0003824_GO:0005215_GO:0005488_GO:0005524_GO:0005575_GO:0005623_GO:0006139_GO:0006163_GO:0006164_GO:0006753_GO:0006754_GO:0008150_GO:0008152_GO:0009117_GO:0009141_GO:0009142_GO:0009144_GO:0009145_GO:0009150_GO:0009152_GO:0009165_GO:0009199_GO:0009201_GO:0009205_GO:0009206_GO:0009259_GO:0009260_GO:0009987_GO:0015075_GO:0015399_GO:0015405_GO:0015662_GO:0016020_GO:0016462_GO:…	NULL	NULL	NULL	NULL	2.85549	676.914	B-up	77.1352	63.6564	125.284	62.6921	30.6194	144.934	105.508	78.6634	185.886	282.95	134.555	138.728	7369.28
PR_76444		NULL	NULL	NULL	NULL	NULL	NULL	2.8715	457.915	B-up	82.5589	62.3955	87.1248	89.511	34.9493	95.0811	73.2224	44.7792	69.325	48.5986	154.649	98.9441	5011.76
PR_77180		NULL	NULL	NULL	NULL	NULL	NULL	2.88646	113.436	B-up	14.9195	17.0483	12.2502	20.3337	12.5571	16.2909	15.1154	16.7761	42.3183	14.486	12.0845	33.192	1247.29
PR_74234		NULL	NULL	NULL	NULL	NULL	NULL	2.88746	183.774	B-up	27.6543	22.6129	19.8786	33.3192	29.5131	21.0834	20.9105	46.6723	57.0657	27.2061	32.1989	29.3255	2021.62
PR_81916	AtTLP1 (TUBBY LIKE PROTEIN 1); phosphoric diester hydrolase/ transcription factor [Arabidopsis thaliana]	NULL	NULL	NULL	NULL	NULL	NULL	2.89694	254.588	B-up	40.033	32.3652	35.7084	24.3736	22.397	54.5257	43.1758	37.7444	49.888	56.8125	35.3808	68.1532	2809.09
PR_96378	UNC-50 family protein [Arabidopsis thaliana]	NULL	GO:0000166_GO:0003674_GO:0003824_GO:0004672_GO:0005488_GO:0005524_GO:0006464_GO:0006468_GO:0006793_GO:0006796_GO:0008150_GO:0008152_GO:0009987_GO:0016301_GO:0016310_GO:0016740_GO:0016772_GO:0016773_GO:0017076_GO:0019538_GO:0030554_GO:0032553_GO:0032555_GO:0032559_GO:0034960_GO:0043170_GO:0043283_GO:0043412_GO:0043687_GO:0044237_GO:0044238_GO:0044260_GO:0044267	NULL	NULL	NULL	NULL	2.90481	703.589	B-up	92.0117	58.9871	43.7255	70.5375	102.715	65.214	81.9294	77.8995	87.9795	112.156	7774.03	106.417	473.043
PR_83989		NULL	NULL	NULL	NULL	NULL	NULL	2.90818	230.623	B-up	35.5588	24.4626	32.4201	19.8148	33.4447	39.2043	44.4857	49.7355	85.1345	34.0119	28.1444	18.3996	2553.28
PR_95021		NULL	NULL	NULL	NULL	NULL	NULL	2.91844	205.578	B-up	25.0887	14.0306	22.8469	43.052	30.3252	21.7587	19.2578	24.9796	24.1754	18.4594	34.2238	112.065	2282.25
PR_74124		NULL	NULL	NULL	NULL	NULL	NULL	2.95811	413.741	B-up	50.7174	64.7525	117.209	41.7028	46.32	69.7344	44.6597	26.1621	32.1861	32.6699	46.8127	154.011	4651.7
PR_85792		TPSI	GO:0003674_GO:0003824_GO:0004175_GO:0004190_GO:0006508_GO:0008150_GO:0008152_GO:0008233_GO:0009987_GO:0016787_GO:0019538_GO:0034960_GO:0043170_GO:0043283_GO:0044237_GO:0044238_GO:0044260_GO:0044267_GO:0070001_GO:0070011	TPSI_3582	gypsy	BCmono	HCoak3	2.95999	165.376	B-up	31.4325	20.7923	18.7354	17.8175	32.6109	27.6989	13.0682	29.5518	24.8057	22.9067	34.7466	1860.94	14.7854
PR_74123		NULL	NULL	NULL	NULL	NULL	NULL	2.96276	295.839	B-up	42.5075	37.5545	47.3307	47.4236	42.4806	40.1955	31.1289	57.2766	67.7151	33.8294	34.9568	31.5837	3331.93
PR_80391		NULL	NULL	NULL	NULL	NULL	NULL	2.98263	183.559	B-up	24.2114	24.1795	25.7642	32.7595	30.5922	21.2085	29.293	21.9638	28.0525	30.942	2080.06	16.5939	20.6559
PR_74237		NULL	NULL	NULL	NULL	NULL	NULL	2.98309	523.513	B-up	82.8654	92.9477	64.8322	80.0389	77.2486	51.8154	61.0919	101.183	108.215	55.1146	41.7839	55.5977	5932.93
PR_82124	peptidase U34, dipeptidase [Methanospirillum hungatei JF-1]	NULL	GO:0003674_GO:0003824_GO:0006508_GO:0008150_GO:0008152_GO:0008233_GO:0008238_GO:0009987_GO:0016787_GO:0016805_GO:0019538_GO:0034960_GO:0043170_GO:0043283_GO:0044237_GO:0044238_GO:0044260_GO:0044267_GO:0070011	NULL	NULL	NULL	NULL	2.99967	359.019	B-up	31.417	37.9147	33.1325	42.5302	41.2773	67.3359	60.4985	41.2488	51.6302	36.8245	87.415	46.7415	4089.28
PR_95025	putative elicitin protein RAM3B [Phytophthora ramorum]	NULL	GO:0005575_GO:0005576_GO:0006950_GO:0006952_GO:0008150_GO:0009405_GO:0044403_GO:0044419_GO:0050896_GO:0051704	NULL	NULL	NULL	NULL	3.04954	808.68	B-up	92.1189	77.3075	47.6115	67.8206	37.0662	79.5307	63.0219	95.0418	161.43	137.369	9350.21	111.483	192.829
PR_73784		NULL	NULL	NULL	NULL	NULL	NULL	3.07375	302.466	B-up	19.1877	30.1272	50.6613	28.9704	20.6852	39.1217	28.8183	15.8135	16.1093	20.5689	93.1674	46.5226	3522.31
PR_85309		NULL	NULL	NULL	NULL	NULL	NULL	3.08429	94.5216	B-up	11.0927	9.3975	9.2441	11.023	11.3997	10.9693	9.0508	9.63	10.5018	11.0184	12.445	1104.41	8.596
PR_83222	adventurous gliding motility protein AgmQ [Myxococcus xanthus DK 1622]	NULL	GO:0003674_GO:0003824_GO:0005488_GO:0005506_GO:0020037_GO:0043167_GO:0043169_GO:0046872_GO:0046906_GO:0046914	NULL	NULL	NULL	NULL	3.08752	247.255	B-up	20.9663	26.0231	26.8873	46.0214	31.3533	26.1726	27.249	25.7081	22.9799	21.4302	24.7489	23.0968	2891.68
PR_83158		NULL	NULL	NULL	NULL	NULL	NULL	3.14123	260.478	B-up	32.8897	20.6078	16.5763	18.6604	24.1124	21.8177	30.721	18.2273	31.8096	25.0319	20.1746	30.7685	3094.81
PR_79074		NULL	GO:0001871_GO:0003674_GO:0003824_GO:0004553_GO:0005488_GO:0005575_GO:0005576_GO:0005975_GO:0008150_GO:0008152_GO:0016787_GO:0016798_GO:0030246_GO:0030247_GO:0030248_GO:0044238	NULL	NULL	NULL	NULL	3.16115	365.744	B-up	26.6208	40.9453	39.5532	20.9822	29.1684	27.8496	30.8176	16.8566	23.6336	30.5725	43.2092	53.7618	4370.71
PR_77250		NULL	GO:0003674_GO:0005488_GO:0005515	NULL	NULL	NULL	NULL	3.18105	179.523	B-up	15.251	15.9738	13.4444	14.9197	13.7549	16.2428	11.4471	11.3585	17.0747	13.6463	19.7051	13.2245	2157.76
PR_83220	adventurous gliding motility protein Q [Myxococcus xanthus]	NULL	GO:0003674_GO:0003824_GO:0005488_GO:0005506_GO:0006508_GO:0008150_GO:0008152_GO:0008233_GO:0008236_GO:0009987_GO:0016787_GO:0017171_GO:0019538_GO:0020037_GO:0034960_GO:0043167_GO:0043169_GO:0043170_GO:0043283_GO:0044237_GO:0044238_GO:0044260_GO:0044267_GO:0046872_GO:0046906_GO:0046914_GO:0070011	NULL	NULL	NULL	NULL	3.2814	545.609	B-up	28.7184	26.9627	37.8358	27.4579	41.8284	20.9729	29.5209	16.4448	24.5387	26.0076	18.7993	46.2876	6747.54
PR_71076	Pyrophosphate-energized vacuolar membrane proton pump (Pyrophosphate-energized inorganic pyrophosphatase) (H(+)-PPase)	NULL	GO:0003674_GO:0003824_GO:0004427_GO:0005215_GO:0005575_GO:0005623_GO:0006810_GO:0006811_GO:0006812_GO:0006818_GO:0008150_GO:0009678_GO:0015399_GO:0015405_GO:0015672_GO:0015992_GO:0016020_GO:0016462_GO:0016787_GO:0016817_GO:0016818_GO:0022804_GO:0022857_GO:0044464_GO:0051179_GO:0051234	NULL	NULL	NULL	NULL	0.0856327	42766.3	NULL	37726	39635	44372	39802.8	44170.3	46652.5	49415.3	44177.3	43929.3	38867.6	47590.9	41711.4	37911.9
PR_78569	putative elicitin protein RAM1B [Phytophthora ramorum]	NULL	GO:0005575_GO:0005576_GO:0006950_GO:0006952_GO:0008150_GO:0009405_GO:0044403_GO:0044419_GO:0050896_GO:0051704	NULL	NULL	NULL	NULL	0.0740991	40356.1	NULL	38560.5	37854.3	42448.2	46153.2	45100.9	40051.8	37129.1	35873.1	38937.7	41973.1	42173.6	40767.8	37605.7
PR_47390	putative elicitin protein RAM1A [Phytophthora ramorum]	NULL	GO:0005575_GO:0005576_GO:0006950_GO:0006952_GO:0008150_GO:0009405_GO:0044403_GO:0044419_GO:0050896_GO:0051704	NULL	NULL	NULL	NULL	0.0798433	38959	NULL	37426.3	35321	39757.2	38922.9	42768.2	39587.7	41649.4	32356.4	36951.7	43778.6	42582.7	37980.5	37384.2
PR_47302	putative elicitin protein RAM5 [Phytophthora ramorum]	NULL	GO:0005575_GO:0005576_GO:0006950_GO:0006952_GO:0008150_GO:0009405_GO:0044403_GO:0044419_GO:0050896_GO:0051704	NULL	NULL	NULL	NULL	0.0790554	37682.1	NULL	35622.1	37102.8	35351.7	35695.8	43023.4	36449.3	35407.9	37724.8	36657.4	39559.8	33241.6	40541.1	43489
PR_72216	60S ribosomal protein L10A (RPL10aA) [Arabidopsis thaliana]	NULL	GO:0003674_GO:0003676_GO:0003723_GO:0005488_GO:0006139_GO:0006396_GO:0008150_GO:0008152_GO:0009987_GO:0010467_GO:0016070_GO:0034960_GO:0043170_GO:0043283_GO:0044237_GO:0044238_GO:0044260	NULL	NULL	NULL	NULL	0.0958583	35537.6	NULL	33012.1	31001.1	31317.7	38661.8	41005.4	33842.4	33878.6	32579.2	35857.7	34773.9	40895.6	40256.4	34906.5
PR_77112	predicted protein [Nematostella vectensis]	NULL	GO:0003674_GO:0003735_GO:0003824_GO:0004175_GO:0004197_GO:0005198_GO:0005575_GO:0005622_GO:0005623_GO:0005737_GO:0005840_GO:0006412_GO:0006508_GO:0008150_GO:0008152_GO:0008233_GO:0008234_GO:0009058_GO:0009059_GO:0009987_GO:0010467_GO:0015934_GO:0016787_GO:0019538_GO:0030528_GO:0030529_GO:0032991_GO:0033279_GO:0034645_GO:0034960_GO:0034961_GO:0043170_GO:0043226_GO:0043228_GO:0043229_GO:0043232_GO:…	NULL	NULL	NULL	NULL	0.0971752	31992.8	NULL	26740.4	29603.6	29123.8	26869.8	32451.1	35235.2	35598	35709.6	33551.9	33674.4	31547.6	30327.8	35473
PR_71250	translation elongation factor 1 alpha [Phytophthora parasitica]	NULL	GO:0000166_GO:0003674_GO:0003676_GO:0003746_GO:0003824_GO:0003924_GO:0005488_GO:0005525_GO:0005575_GO:0005622_GO:0005623_GO:0005737_GO:0005975_GO:0006412_GO:0006414_GO:0008135_GO:0008150_GO:0008152_GO:0009058_GO:0009059_GO:0009987_GO:0010467_GO:0016462_GO:0016740_GO:0016772_GO:0016773_GO:0016787_GO:0016817_GO:0016818_GO:0017076_GO:0017111_GO:0019001_GO:0019538_GO:0032553_GO:0032555_GO:0032561_GO:…	NULL	NULL	NULL	NULL	0.0681188	31919.9	NULL	28744.7	30063.7	31984.5	31966.4	34541.9	32255.7	28241.2	30433.9	31115	34620.4	32564.4	35991.4	32435.3
PR_71317	ADP/ATP translocase [Phytophthora infestans]	NULL	GO:0003674_GO:0005215_GO:0005488_GO:0005575_GO:0005622_GO:0005623_GO:0005737_GO:0005739_GO:0005740_GO:0005743_GO:0006810_GO:0008150_GO:0016020_GO:0019866_GO:0031090_GO:0031966_GO:0031967_GO:0031975_GO:0043226_GO:0043227_GO:0043229_GO:0043231_GO:0044422_GO:0044424_GO:0044429_GO:0044444_GO:0044446_GO:0044464_GO:0051179_GO:0051234	NULL	NULL	NULL	NULL	0.100653	31117.7	NULL	31344.4	24444.1	29277.6	29820.2	28664.2	35881.3	28276.7	33838.2	31607.1	30173.9	35128.2	30903.2	35170.8
PR_84893		NULL	GO:0003674_GO:0005215_GO:0005575_GO:0005623_GO:0006810_GO:0008150_GO:0009987_GO:0016020_GO:0016021_GO:0022857_GO:0022891_GO:0022892_GO:0031224_GO:0044425_GO:0044464_GO:0051179_GO:0051234_GO:0055085	NULL	NULL	NULL	NULL	0.099185	31096.4	NULL	31407.8	30418	34125.7	30090.5	31128.2	35035.3	30624.6	34239	31963.6	32914.2	32377	23173.7	26755.7
PR_71490	manganese superoxide dismutase [Phytophthora nicotianae]	NULL	GO:0003674_GO:0003824_GO:0004784_GO:0005488_GO:0006800_GO:0006801_GO:0008150_GO:0008152_GO:0009987_GO:0016491_GO:0016721_GO:0043167_GO:0044237_GO:0046872	NULL	NULL	NULL	NULL	0.081511	30730.1	NULL	34872.4	29338.4	27972.7	33819.4	28338.4	29489.5	31762.1	28668.5	28502	29066.9	30000.2	35452.4	32208.1
PR_71705	Calmodulin (CaM)	NULL	GO:0003674_GO:0005488_GO:0005509_GO:0043167_GO:0043169_GO:0046872	NULL	NULL	NULL	NULL	0.101317	30314	NULL	33972.4	33224	26055.9	25845.2	31655.9	30516.4	25233.8	30681.4	29507.7	35092.4	28246.1	31227.9	32823.4
PR_46662		NULL	NULL	NULL	NULL	NULL	NULL	0.0874517	29945.3	NULL	29735	28611.6	32998.3	24740.7	34005.5	30622.3	31605.4	33041.8	30456	30317.2	29220.5	28185.8	25748.4
PR_71581	actin [Pythium splendens]	NULL	GO:0000166_GO:0003674_GO:0005488_GO:0005515_GO:0005524_GO:0017076_GO:0030554_GO:0032553_GO:0032555_GO:0032559	NULL	NULL	NULL	NULL	0.0652585	29808.5	NULL	28282.7	29215.9	26718	31139.8	30392.9	33015.6	31590.7	28790.1	30584	29875.7	27969.7	27112.1	32823.7
PR_82339	ribosomal protein L28 [Phytophthora infestans]	NULL	GO:0003674_GO:0003735_GO:0005198_GO:0005575_GO:0005622_GO:0005623_GO:0005737_GO:0005840_GO:0006412_GO:0008150_GO:0008152_GO:0009058_GO:0009059_GO:0009987_GO:0010467_GO:0019538_GO:0030529_GO:0032991_GO:0034645_GO:0034960_GO:0034961_GO:0043170_GO:0043226_GO:0043228_GO:0043229_GO:0043232_GO:0043283_GO:0043284_GO:0044237_GO:0044238_GO:0044249_GO:0044260_GO:0044267_GO:0044424_GO:0044444_GO:0044464	NULL	NULL	NULL	NULL	0.0872387	29579.7	NULL	26619.7	31540.2	28069.5	27065.8	25447.6	27844.9	27601.3	29618.3	32735.1	30176.5	33214.1	31073.2	33530.5
PR_95914	phosphoglucomutase, cytoplasmic, putative / glucose phosphomutase, putative [Arabidopsis thaliana]	NULL	GO:0003674_GO:0003824_GO:0005975_GO:0008150_GO:0008152_GO:0016740_GO:0016772_GO:0016779_GO:0016853_GO:0016866_GO:0016868_GO:0044238	NULL	NULL	NULL	NULL	0.0816674	28025.2	NULL	29341.8	28940	28336.3	27904.2	26406.9	24697.9	30068.3	30094.3	25861.8	26741.3	23776.2	30738.2	31420.7
PR_41489	putative exo-1,3-beta-glucanase [Phytophthora infestans]	NULL	NULL	NULL	NULL	NULL	NULL	0.100479	27662.9	NULL	30081.8	29493.6	29123.5	29062.9	30173.4	25558.8	25240.5	29227.8	23605.6	28720.7	20933.7	28687.9	29707.1
PR_72265	14-3-3-like protein [Phytophthora infestans]	NULL	GO:0003674_GO:0005488_GO:0005515_GO:0019904	NULL	NULL	NULL	NULL	0.0759389	27283.7	NULL	27958.1	24213.6	26639.9	27626.5	29852.3	25253	27991.5	24013.7	29802.7	27125.9	26943.5	26050.4	31217
PR_42197	putative elicitin protein RAM2D [Phytophthora ramorum]	NULL	GO:0005575_GO:0005576_GO:0006950_GO:0006952_GO:0008150_GO:0009405_GO:0044403_GO:0044419_GO:0050896_GO:0051704	NULL	NULL	NULL	NULL	0.0791257	27150.9	NULL	24120.8	23177.1	25977.1	27370.1	29297.1	30177.6	26893.1	25502.8	28517.1	30139.1	25344.9	27631.1	28813.2
PR_78318	Ribosomal protein L27 [Plutella xylostella]	NULL	GO:0003674_GO:0003735_GO:0005198_GO:0005575_GO:0005622_GO:0005623_GO:0005737_GO:0005840_GO:0006412_GO:0008150_GO:0008152_GO:0009058_GO:0009059_GO:0009987_GO:0010467_GO:0019538_GO:0030529_GO:0032991_GO:0034645_GO:0034960_GO:0034961_GO:0043170_GO:0043226_GO:0043228_GO:0043229_GO:0043232_GO:0043283_GO:0043284_GO:0044237_GO:0044238_GO:0044249_GO:0044260_GO:0044267_GO:0044424_GO:0044444_GO:0044464	NULL	NULL	NULL	NULL	0.09774	26975	NULL	29714.9	29776.4	25967.8	24888.5	25194.2	24604.9	25875.3	21398	28427.4	25660.9	29642.1	28749.7	30775.5
PR_71391	Ras-like GTP-binding protein YPT1	NULL	GO:0000166_GO:0003674_GO:0003824_GO:0003924_GO:0005488_GO:0005515_GO:0005524_GO:0005525_GO:0005575_GO:0005622_GO:0005623_GO:0006355_GO:0006810_GO:0006886_GO:0006913_GO:0007154_GO:0007165_GO:0007242_GO:0007264_GO:0008104_GO:0008134_GO:0008150_GO:0009889_GO:0009987_GO:0010468_GO:0010556_GO:0015031_GO:0016462_GO:0016787_GO:0016817_GO:0016818_GO:0017076_GO:0017111_GO:0019001_GO:0019219_GO:0019222_GO:…	NULL	NULL	NULL	NULL	0.0852405	26927.4	NULL	30433.3	29975.2	25622.9	24261.8	26765	24113.1	24987.1	25624.5	27334.5	28248.3	30375.8	23954.6	28360.4
PR_83808	tyrosyl-tRNA synthetase [Mus musculus]	NULL	GO:0000049_GO:0003674_GO:0003676_GO:0003723_GO:0005488	NULL	NULL	NULL	NULL	0.098547	26254	NULL	20153.5	27555.1	25989.3	23368.6	26904.8	27646.5	29991	28113.3	24917.4	28457.9	27262.6	27820.7	23121.2
PR_71257	translation elongation factor 1 alpha [Phytophthora parasitica]	NULL	GO:0000166_GO:0003674_GO:0003676_GO:0003746_GO:0003824_GO:0003924_GO:0005488_GO:0005525_GO:0005575_GO:0005622_GO:0005623_GO:0005737_GO:0005975_GO:0006412_GO:0006414_GO:0008135_GO:0008150_GO:0008152_GO:0009058_GO:0009059_GO:0009987_GO:0010467_GO:0016462_GO:0016740_GO:0016772_GO:0016773_GO:0016787_GO:0016817_GO:0016818_GO:0017076_GO:0017111_GO:0019001_GO:0019538_GO:0032553_GO:0032555_GO:0032561_GO:…	NULL	NULL	NULL	NULL	0.0948764	26002.6	NULL	26748.1	23864.5	23053.3	25435	25126.6	24818.8	29501.6	27445.8	29521.5	26371	24031.7	22053.5	30062.2
PR_93864	GRAM domain protein [Schizosaccharomyces pombe 972h-]	NULL	NULL	NULL	NULL	NULL	NULL	0.0961177	24998.7	NULL	23738.9	24616.9	29605.5	28668.4	27591.1	25752.1	26199.4	24401.5	22514.3	25136.5	21596.8	22790.1	22371
PR_82482	predicted protein [Physcomitrella patens subsp. patens]	NULL	GO:0003674_GO:0003735_GO:0005198_GO:0005575_GO:0005622_GO:0005623_GO:0005737_GO:0005840_GO:0006412_GO:0008150_GO:0008152_GO:0009058_GO:0009059_GO:0009987_GO:0010467_GO:0019538_GO:0030529_GO:0032991_GO:0034645_GO:0034960_GO:0034961_GO:0043170_GO:0043226_GO:0043228_GO:0043229_GO:0043232_GO:0043283_GO:0043284_GO:0044237_GO:0044238_GO:0044249_GO:0044260_GO:0044267_GO:0044424_GO:0044444_GO:0044464	NULL	NULL	NULL	NULL	0.0779319	24621.4	NULL	22216.4	24355.4	20873.2	24384.7	27922.5	23623.6	24261.6	25855.3	24458.3	23860.4	28139.7	24362	25764.5
PR_54969		NULL	NULL	NULL	NULL	NULL	NULL	0.100407	24236.8	NULL	26708.3	25031.1	24721.4	22854.9	22940	21037.6	25327	20492.5	22136.8	22704.8	29664.9	25341.8	26117.6
PR_71735	predicted protein [Ostreococcus lucimarinus CCE9901]	NULL	GO:0003674_GO:0003676_GO:0003743_GO:0005488_GO:0006412_GO:0006413_GO:0008135_GO:0008150_GO:0008152_GO:0009058_GO:0009059_GO:0009987_GO:0010467_GO:0019538_GO:0034645_GO:0034960_GO:0034961_GO:0043170_GO:0043283_GO:0043284_GO:0044237_GO:0044238_GO:0044249_GO:0044260_GO:0044267_GO:0045182	NULL	NULL	NULL	NULL	0.0805108	24087	NULL	21551.7	25523.2	22019.9	22361.9	22933.6	25620.4	22636.3	22513.4	26633.2	24961.4	26014.7	22779.4	27581.9
PR_48417	ribosomal protein L4, component of cytosolic 80S ribosome and 60S large subunit [Chlamydomonas reinhardtii]	NULL	GO:0003674_GO:0003735_GO:0005198_GO:0005575_GO:0005622_GO:0005623_GO:0005737_GO:0005840_GO:0006412_GO:0008150_GO:0008152_GO:0009058_GO:0009059_GO:0009987_GO:0010467_GO:0019538_GO:0030529_GO:0032991_GO:0034645_GO:0034960_GO:0034961_GO:0043170_GO:0043226_GO:0043228_GO:0043229_GO:0043232_GO:0043283_GO:0043284_GO:0044237_GO:0044238_GO:0044249_GO:0044260_GO:0044267_GO:0044424_GO:0044444_GO:0044464	NULL	NULL	NULL	NULL	0.102119	24050.8	NULL	25300.4	24069	23431.2	24519.4	23780.5	24043.4	24395.9	23357	20538.6	19245.7	23206.3	27426.1	29346.8
PR_40681		NULL	GO:0003674_GO:0003735_GO:0005198_GO:0005575_GO:0005622_GO:0005623_GO:0005737_GO:0005840_GO:0006412_GO:0008150_GO:0008152_GO:0009058_GO:0009059_GO:0009987_GO:0010467_GO:0019538_GO:0030529_GO:0032991_GO:0034645_GO:0034960_GO:0034961_GO:0043170_GO:0043226_GO:0043228_GO:0043229_GO:0043232_GO:0043283_GO:0043284_GO:0044237_GO:0044238_GO:0044249_GO:0044260_GO:0044267_GO:0044424_GO:0044444_GO:0044464	NULL	NULL	NULL	NULL	0.0850272	23479.7	NULL	24460.3	25767.7	20248.1	22423.1	24582.2	21470.7	23025.9	21624.6	23955.3	20885.4	25503.3	27183.1	24106.2
PR_72298	enolase [Phytophthora infestans]	NULL	GO:0000015_GO:0003674_GO:0003824_GO:0004634_GO:0005575_GO:0005622_GO:0005623_GO:0005737_GO:0005829_GO:0005975_GO:0005996_GO:0006006_GO:0006007_GO:0006066_GO:0006091_GO:0006096_GO:0008150_GO:0008152_GO:0009056_GO:0009057_GO:0009987_GO:0016052_GO:0016829_GO:0016835_GO:0016836_GO:0019318_GO:0019320_GO:0032991_GO:0043170_GO:0043234_GO:0044237_GO:0044238_GO:0044248_GO:0044260_GO:0044262_GO:0044265_GO:…	NULL	NULL	NULL	NULL	0.0809622	21988.7	NULL	21330	21285.3	23061.9	23225.2	21278.9	20513.8	20469.1	21814.3	21292.3	25022.4	18295.4	24299.3	23964.8
PR_78302	Peptidase T1A, proteasome beta-subunit [Medicago truncatula]	NULL	GO:0000502_GO:0003674_GO:0003824_GO:0004175_GO:0004298_GO:0005575_GO:0005622_GO:0005623_GO:0005839_GO:0006508_GO:0006511_GO:0008150_GO:0008152_GO:0008233_GO:0009056_GO:0009057_GO:0009987_GO:0016787_GO:0019538_GO:0019941_GO:0030163_GO:0032991_GO:0034960_GO:0034962_GO:0043170_GO:0043234_GO:0043283_GO:0043285_GO:0043632_GO:0044237_GO:0044238_GO:0044248_GO:0044257_GO:0044260_GO:0044265_GO:0044267_GO:…	NULL	NULL	NULL	NULL	0.0874245	21656.1	NULL	20687.9	19133.5	19109.7	19249.2	23379.8	22498	22786.1	24303	21540.6	21185.6	23765.7	19686.2	24204
PR_71555	ribosomal protein L3, component of cytosolic 80S ribosome and 60S large subunit [Chlamydomonas reinhardtii]	NULL	GO:0003674_GO:0003735_GO:0005198_GO:0005575_GO:0005622_GO:0005623_GO:0005737_GO:0005840_GO:0006412_GO:0008150_GO:0008152_GO:0009058_GO:0009059_GO:0009987_GO:0010467_GO:0019538_GO:0030529_GO:0032991_GO:0034645_GO:0034960_GO:0034961_GO:0043170_GO:0043226_GO:0043228_GO:0043229_GO:0043232_GO:0043283_GO:0043284_GO:0044237_GO:0044238_GO:0044249_GO:0044260_GO:0044267_GO:0044424_GO:0044444_GO:0044464	NULL	NULL	NULL	NULL	0.0996868	21646.1	NULL	26038.8	24449.8	20812.3	21880.1	22709.2	19800.6	23847.6	20471.7	18811.6	18480.1	19826	22059.4	22212.5
PR_94247		NULL	GO:0003674_GO:0003824_GO:0005215_GO:0005575_GO:0005623_GO:0006091_GO:0006119_GO:0006139_GO:0006163_GO:0006164_GO:0006753_GO:0006754_GO:0006793_GO:0006796_GO:0006810_GO:0006811_GO:0006812_GO:0006818_GO:0008150_GO:0008152_GO:0008324_GO:0009117_GO:0009141_GO:0009142_GO:0009144_GO:0009145_GO:0009150_GO:0009152_GO:0009165_GO:0009199_GO:0009201_GO:0009205_GO:0009206_GO:0009259_GO:0009260_GO:0009987_GO:…	NULL	NULL	NULL	NULL	0.0782771	21585.8	NULL	22129.5	19750.9	20878.1	19447	19982.3	24113.7	20891.6	19880.3	22072.3	20465.1	23875.6	24418.5	22710.4
PR_45077	glyceraldehyde-3-phosphate dehydrogenase [Achlya bisexualis]	NULL	GO:0003674_GO:0003824_GO:0004365_GO:0005488_GO:0005975_GO:0005996_GO:0006006_GO:0006066_GO:0008150_GO:0008152_GO:0008943_GO:0009987_GO:0016491_GO:0016620_GO:0016903_GO:0019318_GO:0044237_GO:0044238_GO:0044262_GO:0048037_GO:0050662_GO:0051287	NULL	NULL	NULL	NULL	0.0852354	20984.3	NULL	22131.4	18220.6	18765.9	23232.2	18181.8	21036.4	23271.4	22589.1	21210	19204.7	20814.4	21233	22904.8
PR_83206	predicted protein [Nematostella vectensis]	NULL	GO:0003674_GO:0003735_GO:0005198_GO:0005575_GO:0005622_GO:0005623_GO:0005737_GO:0005840_GO:0006412_GO:0008150_GO:0008152_GO:0009058_GO:0009059_GO:0009987_GO:0010467_GO:0015935_GO:0019538_GO:0030529_GO:0032991_GO:0033279_GO:0034645_GO:0034960_GO:0034961_GO:0043170_GO:0043226_GO:0043228_GO:0043229_GO:0043232_GO:0043283_GO:0043284_GO:0044237_GO:0044238_GO:0044249_GO:0044260_GO:0044267_GO:0044422_GO:…	NULL	NULL	NULL	NULL	0.0985239	20936.7	NULL	19725.2	20637.3	16917.2	17897.5	21185.8	21455.8	19457	23586.1	24547.6	21032.5	22062.4	23038.5	20633.9
PR_73338		NULL	NULL	NULL	NULL	NULL	NULL	0.0933564	20799.6	NULL	18801.4	19646.2	20471.4	19669.5	19296.9	22524.3	22296.3	23253.5	24162.5	22467.3	18710.4	17647	21447.8
PR_85212	delta-6 fatty acid desaturase [Pythium irregulare]	NULL	GO:0003674_GO:0003824_GO:0006629_GO:0008150_GO:0008152_GO:0016491_GO:0044238	NULL	NULL	NULL	NULL	0.0800007	20188.2	NULL	24238.4	19495.7	20604.4	19435.6	20389.2	18379.6	22528.2	19947.5	20300.6	20654.4	19834	18090.9	18548.8
PR_72088	Argininosuccinate synthase [Thermotoga sp. RQ2]	NULL	GO:0000166_GO:0003674_GO:0003824_GO:0004055_GO:0005488_GO:0005524_GO:0006082_GO:0006519_GO:0006520_GO:0006525_GO:0006526_GO:0006807_GO:0008150_GO:0008152_GO:0008652_GO:0009058_GO:0009064_GO:0009084_GO:0009308_GO:0009309_GO:0009987_GO:0016874_GO:0016879_GO:0017076_GO:0019752_GO:0030554_GO:0032553_GO:0032555_GO:0032559_GO:0034641_GO:0044237_GO:0044238_GO:0044249_GO:0044271	NULL	NULL	NULL	NULL	0.0772656	20164.6	NULL	21177.5	18772.8	18488.2	21171.7	20802.7	20824.4	19188.8	18889	21654.9	16708.1	20667.2	21217.3	22576.7
PR_71293	K+ channel protein [Phytophthora infestans]	NULL	GO:0003674_GO:0003824_GO:0006810_GO:0006811_GO:0006812_GO:0006813_GO:0008150_GO:0008152_GO:0015672_GO:0016491_GO:0030001_GO:0051179_GO:0051234_GO:0055114	NULL	NULL	NULL	NULL	0.0758864	20159.5	NULL	17911.1	20730.1	20525.1	20792.5	20442.7	19654.7	19268.7	22309.6	22769.6	20250.6	17713.2	21550.7	18155.1
PR_85121		NULL	NULL	NULL	NULL	NULL	NULL	0.0959021	20004.2	NULL	21430	20627.6	21641.6	22058	21468.7	15961.2	18796	21646.8	18268.7	19460.3	16997.2	19825.1	21873.4
PR_71923	predicted protein [Nematostella vectensis]	NULL	GO:0003674_GO:0003824_GO:0006629_GO:0008150_GO:0008152_GO:0016491_GO:0044238	NULL	NULL	NULL	NULL	0.0728631	19881.5	NULL	18427.9	18401.3	20965.6	21585.7	18948.1	20245.6	19831.2	22050	20119.2	19289.2	22021.4	19536.2	17038.4
PR_79547	ADP-ribosylation factor-like protein, putative [Trypanosoma cruzi strain CL Brener]	NULL	GO:0000166_GO:0003674_GO:0005488_GO:0005525_GO:0005575_GO:0005622_GO:0005623_GO:0006810_GO:0006886_GO:0007154_GO:0007165_GO:0007242_GO:0007264_GO:0008104_GO:0008150_GO:0009987_GO:0015031_GO:0017076_GO:0019001_GO:0032553_GO:0032555_GO:0032561_GO:0033036_GO:0034613_GO:0044464_GO:0045184_GO:0046907_GO:0050789_GO:0050794_GO:0051179_GO:0051234_GO:0051641_GO:0051649_GO:0065007	NULL	NULL	NULL	NULL	0.070207	19091.8	NULL	19948.3	17329.8	19229.2	18771.3	19434.7	17507.5	18554.6	21443	21255.2	19584.6	19454.3	19016.9	16664.5
PR_77571		NULL	NULL	NULL	NULL	NULL	NULL	0.0922754	18985.6	NULL	18924.7	18204.6	21843.5	22141.7	19407.2	16621.3	16696.4	20190.1	20292.4	19112	17458.4	19087.1	16833.5
PR_71739	histone acetyltransferase [Babesia bovis T2Bo]	NULL	GO:0003674_GO:0003824_GO:0008080_GO:0008150_GO:0008152_GO:0008415_GO:0016407_GO:0016410_GO:0016740_GO:0016746_GO:0016747	NULL	NULL	NULL	NULL	0.0775455	18739.3	NULL	20087.5	17588.5	20728.4	21559.2	18043.3	17715	20039.6	18855.8	17861.3	17242.6	18553	16285.7	19051.1
PR_73130		NULL	NULL	NULL	NULL	NULL	NULL	0.0937051	18734.9	NULL	18103.3	18135.3	20401.8	19297.8	15424	18694.9	17733.4	20940.8	19606.4	20561.6	16069	21236.3	17349.5
PR_84166	pleiotropic drug resistance transporter [Phytophthora sojae]	NULL	GO:0000166_GO:0003674_GO:0003824_GO:0005488_GO:0005524_GO:0016462_GO:0016787_GO:0016817_GO:0016818_GO:0016887_GO:0017076_GO:0017111_GO:0030554_GO:0032553_GO:0032555_GO:0032559	NULL	NULL	NULL	NULL	0.0982022	18724.9	NULL	18971.2	15423.9	19625.3	16819.7	19743.3	22741	16124.4	18914.7	18789.2	19616.5	17761.2	18491.9	20401.8
PR_84145		NULL	GO:0008150_GO:0009987_GO:0019725_GO:0042592_GO:0045454_GO:0050789_GO:0050794_GO:0065007_GO:0065008	NULL	NULL	NULL	NULL	0.073725	18631.8	NULL	17742	18264.4	17165	16661.2	17737.9	18886	17905.1	19356.3	17297.8	20516.7	21561.8	19636.7	19482.7
PR_71393	endomembrane protein 70, putative [Arabidopsis thaliana]	NULL	GO:0005575_GO:0005623_GO:0016020_GO:0016021_GO:0031224_GO:0044425_GO:0044464	NULL	NULL	NULL	NULL	0.101346	18459.3	NULL	19567.6	20400.6	20540.1	19733.5	16942.6	20169.2	19415.6	19213.4	18383.9	14471.1	17426.4	15164.8	18541.7
PR_72121	protein kinase 2 [Beta vulgaris]	NULL	GO:0000166_GO:0003674_GO:0003824_GO:0004672_GO:0004674_GO:0004713_GO:0005488_GO:0005524_GO:0006464_GO:0006468_GO:0006793_GO:0006796_GO:0008150_GO:0008152_GO:0009987_GO:0016301_GO:0016310_GO:0016740_GO:0016772_GO:0016773_GO:0017076_GO:0019538_GO:0030554_GO:0032553_GO:0032555_GO:0032559_GO:0034960_GO:0043170_GO:0043283_GO:0043412_GO:0043687_GO:0044237_GO:0044238_GO:0044260_GO:0044267	NULL	NULL	NULL	NULL	0.100596	18241.8	NULL	17587.6	16654.5	18826.4	20695.1	15825.9	16874.1	19136.9	18499.1	19662.8	19239.5	15637	16601.4	21902.8
PR_77179		NULL	GO:0003674_GO:0003824_GO:0016740	NULL	NULL	NULL	NULL	0.0961296	17795.7	NULL	18272.4	17341.9	19697.1	20891.8	16221.5	15679	19177	19194.5	17937.4	15980.5	16450.1	19233.8	15267.3
PR_72012	Ras-like protein 1 precursor	NULL	GO:0000166_GO:0003674_GO:0003824_GO:0003924_GO:0005488_GO:0005515_GO:0005525_GO:0005575_GO:0005622_GO:0005623_GO:0006810_GO:0006886_GO:0006913_GO:0007154_GO:0007165_GO:0007242_GO:0007264_GO:0008104_GO:0008150_GO:0009987_GO:0015031_GO:0016462_GO:0016787_GO:0016817_GO:0016818_GO:0017076_GO:0017111_GO:0019001_GO:0032553_GO:0032555_GO:0032561_GO:0033036_GO:0034613_GO:0044464_GO:0045184_GO:0046907_GO:…	NULL	NULL	NULL	NULL	0.0863369	17795.4	NULL	15926.6	20395.9	16978.6	15466.7	19640	18185.5	16621.9	16619	19664.2	17119.1	19143.8	18852.3	16727.3
PR_47906	predicted protein [Nematostella vectensis]	NULL	GO:0003674_GO:0005488_GO:0005509_GO:0043167_GO:0043169_GO:0046872	NULL	NULL	NULL	NULL	0.0874239	17780.2	NULL	20150.6	19553.6	20175	17613.6	15237.7	19152.6	16953.1	17305.1	18664.4	15874.3	16277.4	17158.7	17027.1
PR_93244	26S protease regulatory subunit S10b [Aedes aegypti]	NULL	GO:0000166_GO:0003674_GO:0003824_GO:0005488_GO:0005524_GO:0005575_GO:0005622_GO:0005623_GO:0005634_GO:0005737_GO:0008150_GO:0008152_GO:0009056_GO:0009057_GO:0016462_GO:0016787_GO:0016817_GO:0016818_GO:0017076_GO:0017111_GO:0019538_GO:0030163_GO:0030554_GO:0032553_GO:0032555_GO:0032559_GO:0043170_GO:0043226_GO:0043227_GO:0043229_GO:0043231_GO:0043283_GO:0043285_GO:0044238_GO:0044424_GO:0044464	NULL	NULL	NULL	NULL	0.0686371	17647.7	NULL	16896.6	16961.9	18668	16021.4	18623.3	17419.1	17494.4	19635.8	17991.4	14929.4	18790.3	18394.5	17594.2
PR_82854	delta-6 fatty acid desaturase [Pythium irregulare]	NULL	GO:0003674_GO:0003824_GO:0006629_GO:0008150_GO:0008152_GO:0016491_GO:0044238	NULL	NULL	NULL	NULL	0.0729576	17137	NULL	17939.7	16708.4	16519	16050.2	17902	18625.1	14835.6	17264.4	17988.6	19586.2	16298.8	17442.5	15621
PR_71570	predicted protein [Physcomitrella patens subsp. patens]	NULL	NULL	NULL	NULL	NULL	NULL	0.101964	17058.1	NULL	15544.5	19786.1	18697.1	16576.2	15972.1	14067	18255.5	19326	17717.8	16477.2	14532.7	16264	18538.6
PR_85609		NULL	GO:0003674_GO:0003779_GO:0005488_GO:0005509_GO:0005515_GO:0008092_GO:0043167_GO:0043169_GO:0046872	NULL	NULL	NULL	NULL	0.0890366	17041.1	NULL	14804.9	13951	16475.3	18812.8	18499.6	18838.3	17938.5	17930.7	15011.2	17489.9	17779.5	17219.1	16783.2
PR_72065	NADH dehydrogenase [Solanum tuberosum]	NULL	GO:0000166_GO:0003674_GO:0003824_GO:0003954_GO:0005488_GO:0008137_GO:0010181_GO:0016491_GO:0016651_GO:0016655_GO:0048037_GO:0050136_GO:0050662_GO:0051287_GO:0051536_GO:0051539_GO:0051540	NULL	NULL	NULL	NULL	0.0859263	17004.7	NULL	16751.1	19936.8	15326.8	14442.3	17066.9	18372.3	16115.1	18852	17340.2	17274.5	15224.2	16850.3	17509.1
PR_94460		NULL	NULL	NULL	NULL	NULL	NULL	0.0919769	16745.8	NULL	16774.1	19617.1	16658.3	17816.8	17715.8	16220.9	16233.6	17290	15761.1	17394.6	13197.8	14838.5	18177.2
PR_76972	cell 5A endo-1,4-betaglucanase [Phytophthora ramorum]	NULL	GO:0003674_GO:0003824_GO:0004553_GO:0005975_GO:0008150_GO:0008152_GO:0016787_GO:0016798_GO:0044238	NULL	NULL	NULL	NULL	0.101509	16446.8	NULL	15051.4	19135.8	18182.3	17341.4	14020.9	15544.6	16516	17461.3	16963.3	17623.2	13002.6	17481.2	15484
PR_72076	cyclophilin [Bigelowiella natans]	NULL	GO:0003674_GO:0003755_GO:0003824_GO:0016853_GO:0016859	NULL	NULL	NULL	NULL	0.100837	16127.9	NULL	16502.4	13480.9	15012.4	15207.2	15143.8	15497.4	15562.4	15338.2	14956.5	18111.4	17528.5	17491.2	19830.3
PR_74448	peptidase S9B, dipeptidylpeptidase IV domain protein [Plesiocystis pacifica SIR-1]	NULL	GO:0003674_GO:0003824_GO:0005575_GO:0005623_GO:0006508_GO:0008150_GO:0008152_GO:0008233_GO:0008236_GO:0009987_GO:0016020_GO:0016787_GO:0017171_GO:0019538_GO:0034960_GO:0043170_GO:0043283_GO:0044237_GO:0044238_GO:0044260_GO:0044267_GO:0044464_GO:0070011	NULL	NULL	NULL	NULL	0.0995388	16052.6	NULL	19963.3	15765.6	16547.1	17794.8	13585.8	15526.7	14684.2	14280.1	17378.4	15489.4	16587.4	15910.5	15170.4
PR_81566	EMYB5 [Euplotes aediculatus]	NULL	GO:0003674_GO:0003676_GO:0003677_GO:0005488	NULL	NULL	NULL	NULL	0.0756422	15984.1	NULL	14460.9	16633.9	16543.8	15186.5	18296.6	16669	15696.8	17542.7	15782.9	15933.5	13477.2	16321.7	15247.6
PR_71741	rab5 [Culex pipiens quinquefasciatus]	NULL	GO:0000166_GO:0003674_GO:0003824_GO:0003924_GO:0005488_GO:0005515_GO:0005525_GO:0005575_GO:0005622_GO:0005623_GO:0006810_GO:0006886_GO:0006913_GO:0007154_GO:0007165_GO:0007242_GO:0007264_GO:0008104_GO:0008150_GO:0009987_GO:0015031_GO:0016462_GO:0016787_GO:0016817_GO:0016818_GO:0017076_GO:0017111_GO:0019001_GO:0032553_GO:0032555_GO:0032561_GO:0033036_GO:0034613_GO:0044464_GO:0045184_GO:0046907_GO:…	NULL	NULL	NULL	NULL	0.0981676	15939.8	NULL	15864.1	14936.3	13542.1	16024.5	12890.5	15931.5	15146.6	16452.3	18129.3	15627.1	17878.1	16404.7	18390.8
PR_96118	RAB6 protein [Toxoplasma gondii]	NULL	GO:0000166_GO:0003674_GO:0003824_GO:0003924_GO:0005488_GO:0005515_GO:0005525_GO:0005575_GO:0005622_GO:0005623_GO:0006810_GO:0006886_GO:0006913_GO:0007154_GO:0007165_GO:0007242_GO:0007264_GO:0008104_GO:0008150_GO:0009987_GO:0015031_GO:0016462_GO:0016787_GO:0016817_GO:0016818_GO:0017076_GO:0017111_GO:0019001_GO:0032553_GO:0032555_GO:0032561_GO:0033036_GO:0034613_GO:0044464_GO:0045184_GO:0046907_GO:…	NULL	NULL	NULL	NULL	0.0969461	15913.4	NULL	17336	14387.2	15522.2	14676.5	16789.6	15746.6	12443.7	15976.5	15125.6	17209.8	18633.5	17420.6	15606.4
PR_72323		NULL	GO:0003674_GO:0005215_GO:0005575_GO:0005623_GO:0006810_GO:0008150_GO:0009987_GO:0016020_GO:0016021_GO:0022857_GO:0022891_GO:0022892_GO:0031224_GO:0044425_GO:0044464_GO:0051179_GO:0051234_GO:0055085	NULL	NULL	NULL	NULL	0.101591	15862.7	NULL	13811.8	14640.4	17652.3	15951.1	14994.7	17212.6	18026.3	18197.9	17274.2	15019.3	14506.6	13106.7	15821.9
PR_72878	integral membrane protein 1 [Danio rerio]	NULL	GO:0003674_GO:0003824_GO:0004576_GO:0005575_GO:0005623_GO:0005975_GO:0006464_GO:0006486_GO:0008150_GO:0008152_GO:0009058_GO:0009059_GO:0009100_GO:0009101_GO:0009987_GO:0016020_GO:0016740_GO:0016757_GO:0016758_GO:0019538_GO:0034645_GO:0034960_GO:0043170_GO:0043283_GO:0043412_GO:0043413_GO:0044237_GO:0044238_GO:0044249_GO:0044260_GO:0044267_GO:0044464_GO:0070085	NULL	NULL	NULL	NULL	0.090972	15773.9	NULL	18306.7	13325.2	16611.8	16675.1	17129.9	16634.3	14858.3	15379.1	14868	17438.2	15622.2	13892.5	14318.8
PR_71237	26S protease regulatory complex subunit 4, putative [Arabidopsis thaliana]	NULL	GO:0000166_GO:0003674_GO:0003824_GO:0005488_GO:0005524_GO:0005575_GO:0005622_GO:0005623_GO:0005634_GO:0005737_GO:0008150_GO:0008152_GO:0009056_GO:0009057_GO:0016462_GO:0016787_GO:0016817_GO:0016818_GO:0017076_GO:0017111_GO:0019538_GO:0030163_GO:0030554_GO:0032553_GO:0032555_GO:0032559_GO:0043170_GO:0043226_GO:0043227_GO:0043229_GO:0043231_GO:0043283_GO:0043285_GO:0044238_GO:0044424_GO:0044464	NULL	NULL	NULL	NULL	0.0881639	15771.5	NULL	18396.2	17667.5	14686.6	15326.6	13179	16246.2	16326.5	13945.7	14939	15089	16411.5	16800.9	16014.7
PR_75713		NULL	NULL	NULL	NULL	NULL	NULL	0.0888417	15710.6	NULL	14203.8	12572.3	15242.1	15177.4	16121	15947.9	16834	16798.1	17514.4	14147.9	17761	15887.7	16030.3
PR_50314	ATRBP45A (RNA-BINDING PROTEIN 45A); RNA binding [Arabidopsis thaliana]	NULL	GO:0003674_GO:0003676_GO:0005488	NULL	NULL	NULL	NULL	0.0950977	15448.7	NULL	16002.4	15524.4	15321.6	14705.8	17037.6	14487.1	16463.4	16774.8	17614.3	15698.8	12587.9	12664.4	15950.2
PR_76579	delta-6-elongase [Phaeodactylum tricornutum]	NULL	GO:0005575_GO:0005623_GO:0016020_GO:0016021_GO:0031224_GO:0044425_GO:0044464	NULL	NULL	NULL	NULL	0.0652615	15380.9	NULL	16412.5	14444.1	15525.1	13668.3	14279.5	15278.6	14980	16801.6	16369.8	13890.1	15943.2	16115.8	16242.9
PR_96181	predicted protein [Physcomitrella patens subsp. patens]	NULL	GO:0003674_GO:0005215_GO:0005575_GO:0005622_GO:0005623_GO:0005634_GO:0005635_GO:0005643_GO:0005737_GO:0006605_GO:0006606_GO:0006810_GO:0006886_GO:0006913_GO:0008104_GO:0008150_GO:0008565_GO:0009987_GO:0012505_GO:0015031_GO:0016020_GO:0016021_GO:0017038_GO:0022892_GO:0031224_GO:0031967_GO:0031975_GO:0032991_GO:0033036_GO:0033365_GO:0034504_GO:0034613_GO:0043226_GO:0043227_GO:0043229_GO:0043231_GO:…	NULL	NULL	NULL	NULL	0.0677719	15343.5	NULL	14918.4	15620	15040.5	17173	14011.9	16154.2	14768	14415.7	14810.1	16185.5	14568	14396.1	17404.1
PR_78368		NULL	NULL	NULL	NULL	NULL	NULL	0.0976084	14947.5	NULL	14379.5	16478.5	16595.8	14291.6	13752.6	16706.8	13627.8	14814.5	15848.5	17478.4	12817.7	13049.9	14475.4
PR_72398	vacuolar ATP synthase subunit A [Cryptosporidium parvum Iowa II]	NULL	GO:0003674_GO:0003824_GO:0005215_GO:0005575_GO:0005623_GO:0006091_GO:0006119_GO:0006139_GO:0006163_GO:0006164_GO:0006753_GO:0006754_GO:0006793_GO:0006796_GO:0006810_GO:0006811_GO:0006812_GO:0006818_GO:0008150_GO:0008152_GO:0008324_GO:0009117_GO:0009141_GO:0009142_GO:0009144_GO:0009145_GO:0009150_GO:0009152_GO:0009165_GO:0009199_GO:0009201_GO:0009205_GO:0009206_GO:0009259_GO:0009260_GO:0009987_GO:…	NULL	NULL	NULL	NULL	0.100274	14775	NULL	13669.2	14085	15004.2	15974.8	14930.3	16282	13145.9	15883.4	15180.5	15591	12982.2	11925.7	17421.4
PR_71187	Histidine biosynthesis protein HisF:Imidazole glycerol phosphate synthase, glutamine amidotransferase subunit [delta proteobacterium MLMS-1]	NULL	GO:0000105_GO:0000107_GO:0003674_GO:0003824_GO:0005575_GO:0005622_GO:0005623_GO:0005737_GO:0006082_GO:0006519_GO:0006520_GO:0006547_GO:0006807_GO:0008150_GO:0008152_GO:0008652_GO:0009058_GO:0009075_GO:0009076_GO:0009308_GO:0009309_GO:0009382_GO:0009987_GO:0016740_GO:0016757_GO:0016763_GO:0019752_GO:0032991_GO:0034641_GO:0043234_GO:0044237_GO:0044238_GO:0044249_GO:0044271_GO:0044424_GO:0044444_GO:…	NULL	NULL	NULL	NULL	0.071148	14743.3	NULL	14617	15892.3	15049.7	15477.9	15927.1	16003.9	14992.6	14264.4	12504.1	12843.9	14651.1	14260.5	15178.5
PR_76089	Chain A, 4ank: A Designed Ankyrin Repeat Protein With Four Identical Consensus Repeats	NULL	NULL	NULL	NULL	NULL	NULL	0.100551	14697.8	NULL	14349.9	13458.3	14459.8	12734.1	14422.8	16661.9	15029.3	15075.6	14590.8	14923	17590.4	15996.9	11778.8
PR_77095		NULL	GO:0003674_GO:0005215_GO:0005451_GO:0005575_GO:0005623_GO:0006810_GO:0006811_GO:0006812_GO:0006814_GO:0006885_GO:0008150_GO:0008324_GO:0015075_GO:0015077_GO:0015078_GO:0015291_GO:0015297_GO:0015298_GO:0015299_GO:0015300_GO:0015385_GO:0015491_GO:0015672_GO:0016020_GO:0016021_GO:0022804_GO:0022857_GO:0022890_GO:0022891_GO:0022892_GO:0030001_GO:0031224_GO:0042592_GO:0044425_GO:0044464_GO:0048878_GO:…	NULL	NULL	NULL	NULL	0.0655092	14674.7	NULL	15810.4	14749	15661.2	16454.9	14551.1	14333.8	14371.1	13243.6	14729	13575.6	14897.1	15334.6	13059.6
PR_82203	NUK7 [Phytophthora infestans]	NULL	GO:0005575_GO:0005622_GO:0005623_GO:0005737_GO:0005783_GO:0008150_GO:0009987_GO:0019725_GO:0042592_GO:0043226_GO:0043227_GO:0043229_GO:0043231_GO:0044424_GO:0044444_GO:0044464_GO:0045454_GO:0050789_GO:0050794_GO:0065007_GO:0065008	NULL	NULL	NULL	NULL	0.0950864	14551.8	NULL	14121.9	13333.6	15710.7	16943.8	15214.9	14183.7	14667.3	13069.5	12676.8	12579.3	16824.5	15434.6	14413
PR_82618		NULL	GO:0000139_GO:0003674_GO:0005215_GO:0005338_GO:0005351_GO:0005402_GO:0005488_GO:0005515_GO:0005575_GO:0005622_GO:0005623_GO:0005737_GO:0005794_GO:0006810_GO:0008150_GO:0008324_GO:0008643_GO:0012505_GO:0015075_GO:0015144_GO:0015291_GO:0015293_GO:0015294_GO:0015295_GO:0015780_GO:0016020_GO:0016021_GO:0022804_GO:0022857_GO:0022891_GO:0022892_GO:0031090_GO:0031224_GO:0043226_GO:0043227_GO:0043229_GO:…	NULL	NULL	NULL	NULL	0.0720178	14504.6	NULL	15036.4	15803.3	15228.8	15676.2	13447	15239	13564.9	13171.1	13260	13260.2	13725.9	15498.9	15647.8
PR_71871	Aconitate hydratase, mitochondrial precursor (Citrate hydro-lyase) (Aconitase)	NULL	GO:0003674_GO:0003824_GO:0003994_GO:0005488_GO:0006084_GO:0006091_GO:0006099_GO:0006732_GO:0008150_GO:0008152_GO:0009056_GO:0009060_GO:0009109_GO:0009987_GO:0015980_GO:0016829_GO:0016835_GO:0016836_GO:0044237_GO:0044248_GO:0045333_GO:0046356_GO:0051186_GO:0051187_GO:0051536_GO:0051539_GO:0051540	NULL	NULL	NULL	NULL	0.071363	14486.3	NULL	13304	16065.2	15346.8	14582.6	14930.6	14619.8	15679.7	14041.5	12953.1	12895.2	14718.4	13484.1	15700.9
PR_78899		NULL	GO:0003674_GO:0003676_GO:0005488	NULL	NULL	NULL	NULL	0.0592349	14480.3	NULL	14233.1	15757.1	12869.9	13557.2	13456.4	14658.4	15182.2	15372.2	14910.4	14539.9	14630.2	13579	15498
PR_78707		NULL	NULL	NULL	NULL	NULL	NULL	0.0782688	14462	NULL	12829.4	13278.4	13852.9	14555.1	14833.5	12880.4	14347.5	15654.6	13498.3	15742.5	14327	15820.6	16386.3
PR_78081		NULL	NULL	NULL	NULL	NULL	NULL	0.0772746	14425.8	NULL	14443.5	13220.3	13378.6	16202.9	15585.7	15218.2	14323	15125.9	13913	13060.2	12384	15384.6	15295.4
PR_75745		NULL	NULL	NULL	NULL	NULL	NULL	0.0946668	14418.4	NULL	14379.6	14740.5	14445.8	16360	16345	11972.4	16807	13889.3	14934.2	13272.3	13186.1	13739.3	13367.2
PR_82743		NULL	GO:0000221_GO:0003674_GO:0003824_GO:0005215_GO:0005575_GO:0005622_GO:0005623_GO:0005737_GO:0005773_GO:0005774_GO:0006091_GO:0006119_GO:0006139_GO:0006163_GO:0006164_GO:0006753_GO:0006754_GO:0006793_GO:0006796_GO:0006810_GO:0006811_GO:0006812_GO:0006818_GO:0008150_GO:0008152_GO:0008324_GO:0009117_GO:0009141_GO:0009142_GO:0009144_GO:0009145_GO:0009150_GO:0009152_GO:0009165_GO:0009199_GO:0009201_GO:…	NULL	NULL	NULL	NULL	0.067441	14230.7	NULL	12710.1	14577.2	14834	13388.7	13206.9	15272.9	13244.1	14093.8	14292.5	16307.5	14115.8	13810.6	15145.1
PR_71241	predicted protein [Nematostella vectensis]	NULL	GO:0003674_GO:0003824_GO:0004177_GO:0006508_GO:0008150_GO:0008152_GO:0008233_GO:0008235_GO:0008237_GO:0008238_GO:0009987_GO:0016787_GO:0019538_GO:0034960_GO:0043170_GO:0043283_GO:0044237_GO:0044238_GO:0044260_GO:0044267_GO:0070011	NULL	NULL	NULL	NULL	0.0683731	14062	NULL	14103.3	14317	14298.6	13214.3	12553.5	14164.7	12479.1	15094	15998.6	14212.1	15135	13593	13643.4
PR_53922	predicted protein [Physcomitrella patens subsp. patens]	NULL	NULL	NULL	NULL	NULL	NULL	0.0954436	13987.4	NULL	14129.3	12857.5	13426.2	14747.5	12355.7	11162.2	13275.5	14641.6	14135.8	16366.6	15568.7	14083.6	15086.5
PR_76099		NULL	GO:0003674_GO:0003824_GO:0008150_GO:0008152_GO:0016740	NULL	NULL	NULL	NULL	0.101906	13949.6	NULL	12921.2	13681.8	12725.4	13013.2	14598.6	13840.1	11361.2	14987.4	16088	13061.8	13281.6	16666.6	15118.3
PR_80912	zinc finger A20 and AN1 domains-containing protein [Brassica rapa]	NULL	GO:0003674_GO:0005488_GO:0008270_GO:0043167_GO:0043169_GO:0046872_GO:0046914	NULL	NULL	NULL	NULL	0.0842431	13892.4	NULL	15383.6	14907.4	13378	15213.2	15725.2	13716.4	13425.8	14381.4	14054.6	12012.2	12164.4	13809.9	12429
PR_50037	dihydroxy-acid dehydratase [Planctomyces maris DSM 8797]	NULL	GO:0003674_GO:0003824_GO:0004160_GO:0005488_GO:0006082_GO:0006508_GO:0006519_GO:0006520_GO:0006807_GO:0008150_GO:0008152_GO:0008233_GO:0008237_GO:0008270_GO:0008652_GO:0009058_GO:0009081_GO:0009082_GO:0009308_GO:0009309_GO:0009987_GO:0016787_GO:0016829_GO:0016835_GO:0016836_GO:0019538_GO:0019752_GO:0034641_GO:0034960_GO:0043167_GO:0043169_GO:0043170_GO:0043283_GO:0044237_GO:0044238_GO:0044249_GO:…	NULL	NULL	NULL	NULL	0.0772653	13880.2	NULL	14637.4	13559.6	13504.9	13497.1	15678.1	13667.9	14582.6	13086.6	12144.1	16053	13477.4	13970.4	12583.2
PR_72907	rRNA methyltransferase Spb1, putative [Aspergillus clavatus NRRL 1]	NULL	NULL	NULL	NULL	NULL	NULL	0.0871354	13879.2	NULL	12216.6	12463.2	13734	12999.1	14539.4	14140.6	13309.4	15382.6	13391.8	14337.6	14728.1	12572.4	16614.8
PR_74349		NULL	GO:0003674_GO:0003824_GO:0004518_GO:0004519_GO:0004520_GO:0004536_GO:0016787_GO:0016788_GO:0016888_GO:0016893	NULL	NULL	NULL	NULL	0.0992431	13762.8	NULL	13624.5	13039.1	15700.2	13942.1	16246.7	15354.6	15028	13990.9	12047.3	12287.7	12516.8	12724.4	12414.3
PR_75570	predicted protein [Nematostella vectensis]	NULL	GO:0000166_GO:0003674_GO:0003824_GO:0005488_GO:0005515_GO:0005524_GO:0005575_GO:0005622_GO:0005623_GO:0005694_GO:0006996_GO:0008150_GO:0009987_GO:0016043_GO:0016462_GO:0016787_GO:0016817_GO:0016818_GO:0016887_GO:0017076_GO:0017111_GO:0030554_GO:0032553_GO:0032555_GO:0032559_GO:0043226_GO:0043228_GO:0043229_GO:0043232_GO:0044424_GO:0044464_GO:0051276	NULL	NULL	NULL	NULL	0.0927708	13748.7	NULL	12749.6	15033.5	15136.5	15466.1	15525	11739.6	12391.4	14753.2	13992.1	13000.1	12138.3	13148.7	13659.1
PR_71537	CCT chaperonin theta subunit [Physarum polycephalum]	NULL	GO:0000166_GO:0003674_GO:0005488_GO:0005515_GO:0005524_GO:0006457_GO:0008150_GO:0008152_GO:0009987_GO:0017076_GO:0019538_GO:0030554_GO:0032553_GO:0032555_GO:0032559_GO:0034960_GO:0043170_GO:0043283_GO:0044237_GO:0044238_GO:0044260_GO:0044267_GO:0051082	NULL	NULL	NULL	NULL	0.0930378	13677.9	NULL	13649.6	12364.7	13384.6	12257.9	12108.5	13057	13298.4	12765.5	13474.8	14513.6	15996.1	16125.3	14816.3
PR_87857		NULL	NULL	NULL	NULL	NULL	NULL	0.0646755	13662	NULL	12539.9	12747.5	14746.1	12787.4	15655.5	14368.1	14072.4	14080.3	13169.4	14030.3	12891.9	13240.9	13275.7
PR_71278	ubiquitin-conjugating enzyme (E2) [Nicotiana tabacum]	NULL	GO:0003674_GO:0003824_GO:0006464_GO:0008150_GO:0008152_GO:0009987_GO:0016874_GO:0016879_GO:0016881_GO:0019222_GO:0019538_GO:0019787_GO:0034960_GO:0043170_GO:0043283_GO:0043412_GO:0043687_GO:0044237_GO:0044238_GO:0044260_GO:0044267_GO:0050789_GO:0051246_GO:0060255_GO:0065007_GO:0080090	NULL	NULL	NULL	NULL	0.082647	13623.9	NULL	14802.8	13709.1	12518.8	15126.7	11316.7	14791.5	13291.4	13018.5	13441.6	13656.1	15505.7	12980.5	12951.3
PR_71042	glucose regulated protein /BiP [Phytophthora cinnamomi]	NULL	GO:0000166_GO:0003674_GO:0005488_GO:0005524_GO:0017076_GO:0030554_GO:0032553_GO:0032555_GO:0032559	NULL	NULL	NULL	NULL	0.095029	13615.8	NULL	13290.8	14169.8	13200.2	14184.7	11156.2	13752.1	12077.1	13586.3	14075.6	13272.2	14638.3	12772.3	16830.1
PR_71590	septum-promoting GTP-binding protein 1 [Botryotinia fuckeliana B05.10]	NULL	GO:0000166_GO:0003674_GO:0005488_GO:0005525_GO:0005575_GO:0005622_GO:0005623_GO:0006810_GO:0007154_GO:0007165_GO:0007242_GO:0007264_GO:0008104_GO:0008150_GO:0009987_GO:0015031_GO:0017076_GO:0019001_GO:0032553_GO:0032555_GO:0032561_GO:0033036_GO:0044464_GO:0045184_GO:0050789_GO:0050794_GO:0051179_GO:0051234_GO:0065007	NULL	NULL	NULL	NULL	0.0822781	13583.1	NULL	15019.9	12901.9	12003.1	15224.5	12471.4	14831.2	13500.9	12703.7	13466.7	13968.2	15091.5	13385.6	12012
PR_79761	ZZ-type Zn finger-containing protein [Dictyostelium discoideum AX4]	NULL	GO:0008150_GO:0009987_GO:0019725_GO:0042592_GO:0045454_GO:0050789_GO:0050794_GO:0065007_GO:0065008	NULL	NULL	NULL	NULL	0.0870875	13534.6	NULL	12715.2	12410.2	10988	14705.6	12026.8	15092.4	14731.2	13601	13183.5	13618.6	14200.8	13973.9	14703.1
PR_71643	RNA polymerase III subunit RPC2 (ISS) [Ostreococcus tauri]	NULL	GO:0003674_GO:0003676_GO:0003677_GO:0003824_GO:0003899_GO:0005488_GO:0006139_GO:0006350_GO:0008150_GO:0008152_GO:0009058_GO:0009059_GO:0009987_GO:0010467_GO:0016740_GO:0016772_GO:0016779_GO:0034062_GO:0034645_GO:0034960_GO:0034961_GO:0043170_GO:0043283_GO:0043284_GO:0044237_GO:0044238_GO:0044249_GO:0044260	NULL	NULL	NULL	NULL	0.0900108	13433.3	NULL	14381.5	11989.6	15661.4	13558.7	13296.8	13565.9	13074.6	13939.9	12310.5	12695.1	11508.1	12999.3	15651.6
PR_81404		NULL	NULL	NULL	NULL	NULL	NULL	0.0853972	13399.6	NULL	11720.4	13378.1	15363.9	14141.3	12896.9	15103.4	14443.5	13697.2	12886	12634.2	11348.4	12855.8	13726.1
PR_77130		NULL	GO:0001727_GO:0003674_GO:0003824_GO:0004428_GO:0005575_GO:0005622_GO:0005623_GO:0005737_GO:0005829_GO:0005942_GO:0006629_GO:0006643_GO:0006644_GO:0006650_GO:0006793_GO:0006796_GO:0007154_GO:0007165_GO:0007242_GO:0008150_GO:0008152_GO:0009987_GO:0016301_GO:0016303_GO:0016310_GO:0016740_GO:0016772_GO:0016773_GO:0019932_GO:0030258_GO:0030384_GO:0032991_GO:0035004_GO:0043234_GO:0044237_GO:0044238_GO:…	NULL	NULL	NULL	NULL	0.069639	13377	NULL	13210	12564	13634.8	15595.2	13284.9	15131.3	12950	12774	12885.3	12956	13037.2	13665.7	12212.6
PR_72314	putative aldehyde dehydrogenase BIS1 [Hordeum vulgare]	NULL	NULL	NULL	NULL	NULL	NULL	0.0975585	13370.8	NULL	13803.9	11303.9	12912.5	16152.3	12825.3	12789.6	13103.3	11708.1	12104.1	14238	13410.4	14448.4	15021.1
PR_39105	PREDICTED: similar to ankyrin 2,3/unc44 [Strongylocentrotus purpuratus]	NULL	NULL	NULL	NULL	NULL	NULL	0.0903343	13358.2	NULL	15300.4	13203.4	13425.7	12785.3	13392.4	11967.5	12971.4	13862.5	15350.8	13310	14874.8	11450.6	11761.4
PR_80741	protein tyrosine phosphatase [Plasmodium chabaudi chabaudi]	NULL	GO:0003674_GO:0003824_GO:0004721_GO:0004725_GO:0006464_GO:0006470_GO:0006793_GO:0006796_GO:0008150_GO:0008152_GO:0009987_GO:0016311_GO:0016787_GO:0016788_GO:0016791_GO:0019538_GO:0034960_GO:0042578_GO:0043170_GO:0043283_GO:0043412_GO:0043687_GO:0044237_GO:0044238_GO:0044260_GO:0044267	NULL	NULL	NULL	NULL	0.0758774	13322	NULL	13843.5	13095.9	13102.1	14160.3	14923.5	14125.8	12117.8	13736.6	12771.2	12370.5	14688.7	12971.8	11278.2
PR_71868	protein kinase 2 [Dictyostelium discoideum AX4]	NULL	GO:0000166_GO:0003674_GO:0003824_GO:0004672_GO:0004674_GO:0004713_GO:0005488_GO:0005524_GO:0006464_GO:0006468_GO:0006793_GO:0006796_GO:0008150_GO:0008152_GO:0009987_GO:0016301_GO:0016310_GO:0016740_GO:0016772_GO:0016773_GO:0017076_GO:0019538_GO:0030554_GO:0032553_GO:0032555_GO:0032559_GO:0034960_GO:0043170_GO:0043283_GO:0043412_GO:0043687_GO:0044237_GO:0044238_GO:0044260_GO:0044267	NULL	NULL	NULL	NULL	0.0924501	13218.5	NULL	14827.2	15090.1	11405.1	12208.1	12364.3	12587.4	14004.9	13150.9	14269.9	14916.2	12755.5	11541.4	12719.7
PR_74679	PREDICTED: similar to peroxisomal lon protease isoform 2 [Canis familiaris]	NULL	GO:0000166_GO:0003674_GO:0003824_GO:0004175_GO:0004176_GO:0004252_GO:0005488_GO:0005524_GO:0006508_GO:0006510_GO:0008150_GO:0008152_GO:0008233_GO:0008236_GO:0009987_GO:0016462_GO:0016787_GO:0016817_GO:0016818_GO:0016887_GO:0017076_GO:0017111_GO:0017171_GO:0019538_GO:0030554_GO:0032553_GO:0032555_GO:0032559_GO:0034960_GO:0042623_GO:0043170_GO:0043283_GO:0044237_GO:0044238_GO:0044260_GO:0044267_GO:…	NULL	NULL	NULL	NULL	0.075322	13122	NULL	12445.2	14285.7	14181.8	13995.2	11356.3	13072.3	11278.6	12567.1	12810.3	14267.9	13085.6	13986	13253.9
PR_54177	Peptidase S9, prolyl oligopeptidase active site region [Croceibacter atlanticus HTCC2559]	NULL	GO:0003674_GO:0003824_GO:0004175_GO:0004252_GO:0006508_GO:0008150_GO:0008152_GO:0008233_GO:0008236_GO:0009987_GO:0016787_GO:0017171_GO:0019538_GO:0034960_GO:0043170_GO:0043283_GO:0044237_GO:0044238_GO:0044260_GO:0044267_GO:0070011	NULL	NULL	NULL	NULL	0.0643029	13053	NULL	12879.4	12462.5	12368.1	12893.5	13455.8	13058.6	13462	13667	12511.5	14340.3	12679.1	11301.8	14609.2
PR_94396		NULL	NULL	NULL	NULL	NULL	NULL	0.0615333	12916.1	NULL	13447.5	11843.2	11849.9	13354.7	11637.3	13997.1	13399.3	13216	12682.1	12382.5	13073.7	14301.9	12724.3
PR_87498		NULL	NULL	NULL	NULL	NULL	NULL	0.0936889	12859.6	NULL	13965.9	10916.4	11468.4	11780.8	13181.7	11957.7	12619.4	13965.6	15560.3	12070.5	12828.4	13477.6	13382.4
PR_72043	PREDICTED: similar to nuclear export factor CRM1 [Nasonia vitripennis]	NULL	GO:0000059_GO:0003674_GO:0005215_GO:0005575_GO:0005622_GO:0005623_GO:0005634_GO:0005635_GO:0005643_GO:0005737_GO:0006461_GO:0006605_GO:0006606_GO:0006810_GO:0006886_GO:0006913_GO:0008104_GO:0008150_GO:0008565_GO:0009987_GO:0010926_GO:0012505_GO:0015031_GO:0016020_GO:0016021_GO:0016043_GO:0017038_GO:0022607_GO:0022892_GO:0031224_GO:0031967_GO:0031975_GO:0032991_GO:0033036_GO:0033365_GO:0034504_GO:…	NULL	NULL	NULL	NULL	0.0805674	12820.9	NULL	11437.7	11723.1	12125.2	12698.4	13646.6	11993.7	12965.9	13943.2	12864.8	12380.9	13132.7	12286.9	15472.1
PR_74759	PREDICTED: similar to ENSANGP00000025789 [Nasonia vitripennis]	NULL	NULL	NULL	NULL	NULL	NULL	0.0732233	12719.6	NULL	13048.4	14120.1	11869.5	13345.9	11905.2	13897.6	13893.4	11861.2	12275.7	12501.2	11011.8	13424	12200.7
PR_76154	predicted protein [Nematostella vectensis]	NULL	NULL	NULL	NULL	NULL	NULL	0.0881163	12694.6	NULL	13410.2	12386.4	14056.8	11217.4	14058.6	13378.6	10753.8	13289.3	13928.2	13301.2	11367.6	11502	12379.2
PR_71388	AGAP000672-PA [Anopheles gambiae str. PEST]	NULL	GO:0000166_GO:0003674_GO:0005488_GO:0005525_GO:0017076_GO:0019001_GO:0032553_GO:0032555_GO:0032561	NULL	NULL	NULL	NULL	0.0804093	12646.7	NULL	12109.5	12340.8	13091.5	11258.8	13684.8	11487.9	13302.4	13790.1	13191.4	12147.9	13674.4	10629	13698.8
PR_76416		TPSI	GO:0000775_GO:0003674_GO:0003676_GO:0003677_GO:0005488_GO:0005575_GO:0005622_GO:0005623_GO:0005634_GO:0005694_GO:0043226_GO:0043227_GO:0043228_GO:0043229_GO:0043231_GO:0043232_GO:0044422_GO:0044424_GO:0044427_GO:0044446_GO:0044464	TPSI_1680	DDE_1	NULL	NULL	0.0843793	12636.1	NULL	11824	12063.2	13651.7	13685.5	13511.2	12868.9	11358.2	13719	14197.9	12399.3	10682.3	11361.8	12946.2
PR_71387	malate synthase AcuE [Aspergillus fumigatus Af293]	NULL	GO:0003674_GO:0003824_GO:0004474_GO:0005975_GO:0006081_GO:0006082_GO:0006097_GO:0008150_GO:0008152_GO:0009987_GO:0016740_GO:0016746_GO:0019752_GO:0032787_GO:0044237_GO:0044238_GO:0044262_GO:0046487_GO:0046912	NULL	NULL	NULL	NULL	0.098968	12606	NULL	12452.3	11166.2	11251.7	13453.2	13384.5	11060.1	13655.6	12295.9	12661.1	13414.5	10517.7	14896.3	13668.3
PR_76259	peptidylprolyl isomerase-like protein [Trypanosoma brucei TREU927]	NULL	GO:0006457_GO:0008150_GO:0008152_GO:0009987_GO:0019538_GO:0034960_GO:0043170_GO:0043283_GO:0044237_GO:0044238_GO:0044260_GO:0044267	NULL	NULL	NULL	NULL	0.102048	12566.6	NULL	14406.8	10839.8	13077	13092.7	12517.4	13443.8	11671.6	12482.8	12500.7	11722.1	15385.5	11133.4	11091.5
PR_71711	PP2A-widerborst subunit [Chlamydomonas reinhardtii]	NULL	GO:0000159_GO:0003674_GO:0005575_GO:0005622_GO:0005623_GO:0007154_GO:0007165_GO:0008150_GO:0008287_GO:0008601_GO:0009987_GO:0019208_GO:0019888_GO:0030234_GO:0032991_GO:0043234_GO:0044424_GO:0044464_GO:0050789_GO:0050794_GO:0065007	NULL	NULL	NULL	NULL	0.0704187	12481.1	NULL	11893.3	12176	14754.8	13825.3	11824.5	12761	11606.2	12087.9	12637.5	11756.1	11987.7	12022.7	12921.1
PR_73881	presenilin 1-related peptidase [Entamoeba histolytica HM-1:IMSS]	NULL	GO:0005575_GO:0005623_GO:0007154_GO:0007165_GO:0007242_GO:0008150_GO:0009987_GO:0016020_GO:0016021_GO:0031224_GO:0044425_GO:0044464_GO:0050789_GO:0050794_GO:0065007	NULL	NULL	NULL	NULL	0.100427	12348.3	NULL	13598.4	11419.2	13852.7	13220.6	12090.7	10474.2	11035.1	13065.2	13380.5	14224	11552.3	12126.5	10488.6
PR_71421	putative leaf development and shoot apical meristem regulating protein [Oryza sativa (japonica cultivar-group)]	NULL	NULL	NULL	NULL	NULL	NULL	0.0887408	12320.1	NULL	13943.4	13057.5	13043.5	13671.1	13256.8	10924.3	12884.4	12250.9	12852.4	11099.1	11227.9	10602.9	11347
PR_71532	elicitin-like protein RAL8A [Phytophthora ramorum]	NULL	GO:0005575_GO:0005576_GO:0006950_GO:0006952_GO:0008150_GO:0009405_GO:0044403_GO:0044419_GO:0050896_GO:0051704	NULL	NULL	NULL	NULL	0.0889673	12234.5	NULL	13140.6	12908.3	11609	12965.4	12125	13691.8	13884.6	11231.7	10932.5	11449.2	12569	12506.6	10034.6
PR_83712		NULL	GO:0003674_GO:0003676_GO:0003824_GO:0004553_GO:0005488_GO:0008150_GO:0008152_GO:0009056_GO:0016787_GO:0016798_GO:0016998_GO:0033903_GO:0043170_GO:0044036	NULL	NULL	NULL	NULL	0.0653017	12220.1	NULL	12947.1	11925.9	12156.2	12586.2	12752.3	11355.6	10847	11927	11935.3	12128	12441.1	11630.7	14229.5
PR_81587		NULL	NULL	NULL	NULL	NULL	NULL	0.092033	12125.9	NULL	11379.4	12184.3	11806.1	10437	11261	10699.6	12508.7	13284.9	14483.5	13565.9	11315.3	12421.2	12289.4
PR_81170		NULL	NULL	NULL	NULL	NULL	NULL	0.0877206	12010.8	NULL	10550.4	12579.9	12465	10405.7	11617.4	13905.9	11443	12657.7	12981.2	12267.3	10341.1	12963.3	11963.1
PR_71693	protein kinase 2 beta chain [Nicotiana tabacum]	NULL	GO:0005575_GO:0005622_GO:0005623_GO:0005956_GO:0008605_GO:0032991_GO:0043234_GO:0044424_GO:0044464	NULL	NULL	NULL	NULL	0.09796	11989.1	NULL	10808.7	12807.2	12712.9	10389.1	9906.98	13233.9	11092.9	12720.5	12629.4	11703.7	11070.7	13006.7	13775.5
PR_95965		NULL	NULL	NULL	NULL	NULL	NULL	0.0454707	11933.6	NULL	12178.1	12525.5	12529.7	12701.5	11469.9	12157.4	11145.7	11632.1	11988.1	11066.2	11281.3	11967.7	12493.8
PR_73410		NULL	NULL	NULL	NULL	NULL	NULL	0.0909431	11821.9	NULL	10925.1	10893.8	12253.3	12004.6	11540.3	9873.3	12103.7	11590.3	11177.2	12160.4	13586.9	11442.3	14133.2
PR_74337		NULL	NULL	NULL	NULL	NULL	NULL	0.086247	11800.9	NULL	11799.2	11558.9	12247.1	9718.95	10829.9	11694.1	12196.9	12254.7	13436.3	10691.2	13581	12183.1	11220.5
PR_74426	Os01g0168500 [Oryza sativa (japonica cultivar-group)]	NULL	GO:0003674_GO:0005215_GO:0005575_GO:0005622_GO:0005623_GO:0006091_GO:0006119_GO:0006139_GO:0006163_GO:0006164_GO:0006753_GO:0006754_GO:0006793_GO:0006796_GO:0006810_GO:0006811_GO:0006812_GO:0006818_GO:0008150_GO:0008152_GO:0008324_GO:0009117_GO:0009141_GO:0009142_GO:0009144_GO:0009145_GO:0009150_GO:0009152_GO:0009165_GO:0009199_GO:0009201_GO:0009205_GO:0009206_GO:0009259_GO:0009260_GO:0009987_GO:…	NULL	NULL	NULL	NULL	0.0666444	11692	NULL	12460.6	11530.3	11179	11484.8	11901.8	12747.2	11968.2	11152.9	11618.6	10050.1	12257.3	12915.6	10728.8
PR_80889		NULL	NULL	NULL	NULL	NULL	NULL	0.0992282	11657.4	NULL	10318.8	13540.7	11519.1	11714.1	10644.5	12589.1	12299.5	13377.7	12384.4	11839.4	9584.95	11441.4	10292
PR_74010		NULL	NULL	NULL	NULL	NULL	NULL	0.0800276	11611.7	NULL	12607.5	10998.2	12886.3	12924	10282.8	10783.3	12039.5	12643.6	11731.3	11441.8	10011	11219.9	11382.8
PR_94794		NULL	GO:0003674_GO:0003824_GO:0004221_GO:0006508_GO:0006511_GO:0008150_GO:0008152_GO:0009056_GO:0009057_GO:0009987_GO:0016787_GO:0016788_GO:0016790_GO:0019538_GO:0019941_GO:0030163_GO:0034960_GO:0034962_GO:0043170_GO:0043283_GO:0043285_GO:0043632_GO:0044237_GO:0044238_GO:0044248_GO:0044257_GO:0044260_GO:0044265_GO:0044267_GO:0051603	NULL	NULL	NULL	NULL	0.089346	11607.8	NULL	11247.1	12987.4	12204.4	9236.05	10884.8	13270.3	11452.6	12047.5	11897.7	10782.5	12694.1	11097.9	11099
PR_72578	putative endo-1,3-beta-glucanase [Phytophthora infestans]	NULL	GO:0003674_GO:0003824_GO:0004553_GO:0005975_GO:0008150_GO:0008152_GO:0016787_GO:0016798_GO:0044238	NULL	NULL	NULL	NULL	0.0889867	11545.4	NULL	12896.1	11846.3	12741.1	12441.1	10745.3	13118.9	12087.4	10468.5	9724.92	11496.5	10775.3	10561.5	11187.7
PR_81460	cyst germination specific acidic repeat protein precursor [Phytophthora infestans]	NULL	NULL	NULL	NULL	NULL	NULL	0.0943223	11497.1	NULL	11331.3	13844.4	13016.9	10299.6	10469.6	11216.6	11789.9	12459.7	11581.2	10838.8	11899.3	9783.15	10931.3
PR_72665	Nucleoside-diphosphate-sugar epimerase-like [Pelodictyon luteolum DSM 273]	NULL	GO:0003674_GO:0005488_GO:0005515	NULL	NULL	NULL	NULL	0.089746	11484	NULL	12062.5	11291.6	13119.2	11597.6	12745.6	11114	11751.2	10357.5	11061.1	10122.7	10044.2	13240.8	10784.2
PR_47657	predicted protein [Physcomitrella patens subsp. patens]	NULL	GO:0000166_GO:0003674_GO:0003824_GO:0004812_GO:0004818_GO:0005488_GO:0005524_GO:0005575_GO:0005622_GO:0005623_GO:0005737_GO:0006082_GO:0006139_GO:0006399_GO:0006412_GO:0006418_GO:0006424_GO:0006519_GO:0006520_GO:0006807_GO:0008150_GO:0008152_GO:0009058_GO:0009059_GO:0009308_GO:0009987_GO:0010467_GO:0016070_GO:0016874_GO:0016875_GO:0016876_GO:0017076_GO:0019538_GO:0019752_GO:0030554_GO:0032553_GO:…	NULL	NULL	NULL	NULL	0.0960038	11421.9	NULL	13231.1	11441.8	11056	12096.6	11709.4	9743.3	11462.4	11277	11809.1	10448.2	9283.35	13172.2	11754.5
PR_74204		NULL	NULL	NULL	NULL	NULL	NULL	0.0830143	11415.7	NULL	11270.9	11036	10716.5	11003.8	12972.3	12122.9	12774.4	11045.8	10761.1	10850.8	10072.7	10674.2	13102.2
PR_52533	SET domain containing 1Bb [Danio rerio]	NULL	NULL	NULL	NULL	NULL	NULL	0.0801835	11359.2	NULL	11152.8	12000.9	12433.6	12364	13378.1	11467.9	10700.8	10308.5	10285.9	11010.5	11287.4	10976.4	10302.9
PR_97175	GA10707-PA [Drosophila pseudoobscura]	NULL	GO:0003674_GO:0003676_GO:0005488	NULL	NULL	NULL	NULL	0.0851555	11051.7	NULL	12701.9	11270	9955.04	11106.8	9158.92	10639.8	10240.6	11072.3	10665.8	10878.1	11670.1	11905.3	12406.9
PR_79087	predicted protein [Monosiga brevicollis MX1]	NULL	NULL	NULL	NULL	NULL	NULL	0.0939725	11047.5	NULL	10413.9	12259.4	11515.1	11439.8	13185	11108.3	11511	11603.2	11248.1	10141.9	9167.76	10271.5	9752.9
PR_94088	PREDICTED: similar to Strumpellin [Equus caballus]	NULL	GO:0003674_GO:0008047_GO:0019208_GO:0019211_GO:0019888_GO:0030234	NULL	NULL	NULL	NULL	0.0697011	10994.2	NULL	11336	10442	11911.8	11431.1	11410.7	11383.2	11744	8991.11	11149.8	10517.5	11556.8	10894.1	10156.4
PR_76465	PREDICTED: similar to serine/threonine protein kinase [Strongylocentrotus purpuratus]	NULL	GO:0000166_GO:0003674_GO:0003824_GO:0004672_GO:0004674_GO:0004713_GO:0005488_GO:0005524_GO:0006464_GO:0006468_GO:0006793_GO:0006796_GO:0008150_GO:0008152_GO:0008270_GO:0009987_GO:0016301_GO:0016310_GO:0016740_GO:0016772_GO:0016773_GO:0017076_GO:0019538_GO:0030554_GO:0032553_GO:0032555_GO:0032559_GO:0034960_GO:0043167_GO:0043169_GO:0043170_GO:0043283_GO:0043412_GO:0043687_GO:0044237_GO:0044238_GO:…	NULL	NULL	NULL	NULL	0.0795414	10981.9	NULL	9995.1	11879.1	11633.6	12136.7	9451.82	10721	11541.8	12204	10041.4	11013.5	10244.2	11557.2	10345.2
PR_82452		NULL	NULL	NULL	NULL	NULL	NULL	0.0995834	10971.8	NULL	11215.3	10501	10455.1	10303.6	9291.13	9630.11	9677.23	11306.6	11868	12274.6	13245.8	11341.6	11522.7
PR_49765	predicted protein [Physcomitrella patens subsp. patens]	NULL	GO:0000166_GO:0003674_GO:0003824_GO:0005488_GO:0016491_GO:0017076_GO:0030554_GO:0048037_GO:0050660_GO:0050662	NULL	NULL	NULL	NULL	0.0856965	10912.5	NULL	12483.1	11525.9	10862.8	11908.1	11401.7	9859.37	9123.84	10501.7	10431.9	10654.2	12214.9	10006.3	10888.4
PR_71236	Delta-1-pyrroline-5-carboxylate synthetase (P5CS) [Includes: Glutamate 5-kinase (Gamma-glutamyl kinase) (GK); Gamma-glutamyl phosphate reductase (GPR) (Glutamate-5-semialdehyde dehydrogenase) (Glutamyl-gamma-semialdehyde dehydrogenase)]	NULL	GO:0003674_GO:0003824_GO:0004349_GO:0004350_GO:0005575_GO:0005622_GO:0005623_GO:0005737_GO:0006082_GO:0006519_GO:0006520_GO:0006560_GO:0006561_GO:0006807_GO:0008150_GO:0008152_GO:0008652_GO:0009058_GO:0009064_GO:0009084_GO:0009308_GO:0009309_GO:0009987_GO:0016301_GO:0016491_GO:0016620_GO:0016740_GO:0016772_GO:0016774_GO:0016903_GO:0019202_GO:0019752_GO:0034641_GO:0044237_GO:0044238_GO:0044249_GO:…	NULL	NULL	NULL	NULL	0.0946868	10812.6	NULL	11650.5	11356.1	10295.6	11849.4	10058.1	8746.27	11092	12617.3	10742.9	11374.8	9231.5	10394.4	11154.6
PR_74937		NULL	NULL	NULL	NULL	NULL	NULL	0.0886543	10799.9	NULL	10670	12124.4	12119.2	11730.4	10626.5	10593.2	8993.42	10678.1	10994.9	9088.16	10698.2	11780.6	10301.3
PR_73661	ER-located HSP110/SSE-like protein [Chlamydomonas reinhardtii]	NULL	GO:0000166_GO:0003674_GO:0005488_GO:0005524_GO:0017076_GO:0030554_GO:0032553_GO:0032555_GO:0032559	NULL	NULL	NULL	NULL	0.0819948	10657.1	NULL	10617.2	10307.3	10952.8	11519.2	9804.64	9575.95	10373.7	10595.3	9740.07	11683	10369.6	10162	12841.4
PR_40378	Hypothetical protein CBG04131 [Caenorhabditis briggsae AF16]	NULL	GO:0003674_GO:0003676_GO:0003723_GO:0003743_GO:0005488_GO:0005575_GO:0005622_GO:0005623_GO:0005737_GO:0006412_GO:0006413_GO:0008135_GO:0008150_GO:0008152_GO:0009058_GO:0009059_GO:0009987_GO:0010467_GO:0019538_GO:0034645_GO:0034960_GO:0034961_GO:0043170_GO:0043283_GO:0043284_GO:0044237_GO:0044238_GO:0044249_GO:0044260_GO:0044267_GO:0044424_GO:0044464_GO:0045182	NULL	NULL	NULL	NULL	0.0624729	10620	NULL	9617.33	10672.1	10468	9911.06	10017.3	11130.4	10918.7	11587	12104.4	10464.8	10166.2	10699.7	10302.7
PR_87914	putative tryptophanyl-tRNA synthetase (ISS) [Ostreococcus tauri]	NULL	GO:0000166_GO:0003674_GO:0003824_GO:0004812_GO:0004830_GO:0005488_GO:0005524_GO:0005575_GO:0005622_GO:0005623_GO:0005737_GO:0006082_GO:0006139_GO:0006399_GO:0006412_GO:0006418_GO:0006436_GO:0006519_GO:0006520_GO:0006807_GO:0008150_GO:0008152_GO:0009058_GO:0009059_GO:0009308_GO:0009987_GO:0010467_GO:0016070_GO:0016874_GO:0016875_GO:0016876_GO:0017076_GO:0019538_GO:0019752_GO:0030554_GO:0032553_GO:…	NULL	NULL	NULL	NULL	0.0911546	10601.1	NULL	11009.8	11066.5	11986.2	10514.9	9436.46	9889.09	8042.63	11267.4	10504.1	10822.3	11169.1	11359.3	10746.1
PR_94597		NULL	GO:0003674_GO:0003676_GO:0003824_GO:0004518_GO:0004527_GO:0005488_GO:0005575_GO:0005622_GO:0005623_GO:0006139_GO:0008150_GO:0008152_GO:0008408_GO:0008415_GO:0009987_GO:0016740_GO:0016746_GO:0016747_GO:0016787_GO:0016788_GO:0044237_GO:0044238_GO:0044464	NULL	NULL	NULL	NULL	0.0870428	10563.5	NULL	9467.76	9724.53	10987	10103.2	11942.6	9876.23	8779.43	11961.9	11303.1	10240.3	10893.7	11021.5	11024
PR_44199	RAB18, member RAS oncogene family [Xenopus tropicalis]	NULL	GO:0000166_GO:0003674_GO:0005488_GO:0005525_GO:0005575_GO:0005622_GO:0005623_GO:0006810_GO:0007154_GO:0007165_GO:0007242_GO:0007264_GO:0008104_GO:0008150_GO:0009987_GO:0015031_GO:0017076_GO:0019001_GO:0032553_GO:0032555_GO:0032561_GO:0033036_GO:0044464_GO:0045184_GO:0050789_GO:0050794_GO:0051179_GO:0051234_GO:0065007	NULL	NULL	NULL	NULL	0.0957603	10561.1	NULL	11091.1	9667.06	9760.6	11224.9	10212	11072.9	9050.55	10065.7	11309.9	9695.39	11938.8	12590.7	9614.49
PR_76673		NULL	GO:0003674_GO:0003676_GO:0003677_GO:0005488_GO:0005575_GO:0005622_GO:0005623_GO:0005634_GO:0006139_GO:0006325_GO:0006350_GO:0006351_GO:0006352_GO:0006464_GO:0006996_GO:0008150_GO:0008152_GO:0009058_GO:0009059_GO:0009987_GO:0010467_GO:0010926_GO:0016043_GO:0016070_GO:0016568_GO:0016569_GO:0016570_GO:0019538_GO:0022607_GO:0032774_GO:0034621_GO:0034622_GO:0034645_GO:0034960_GO:0034961_GO:0043170_GO:…	NULL	NULL	NULL	NULL	0.0955241	10527.1	NULL	9776.32	11761.9	12940	10081.7	9466.93	10456.8	10708.8	11836.1	9990.3	10565.2	9542.86	9960.53	9764.25
PR_79993		NULL	NULL	NULL	NULL	NULL	NULL	0.0721065	10525.8	NULL	10418.2	9864	11478.1	11287	12417.7	10154	10157.4	10878.6	9831.13	10243.2	10190	9601.02	10314.6
PR_80703	predicted protein [Nematostella vectensis]	NULL	NULL	NULL	NULL	NULL	NULL	0.0934819	10480.5	NULL	8908.01	10422.1	12794.7	10761.5	9922.29	11165.1	11589.5	9413.04	9907.48	10137.6	11007.9	10565.6	9651.62
PR_76260	putative protein [Arabidopsis thaliana]	NULL	GO:0003674_GO:0003676_GO:0003824_GO:0005488_GO:0016787_GO:0016788	NULL	NULL	NULL	NULL	0.0885315	10474.6	NULL	11280.3	9598.21	11401.3	11457.6	12173.6	9068.7	10694.5	11033	10183.3	9619.05	10626.3	9374.85	9659.42
PR_80463	predicted protein [Ostreococcus lucimarinus CCE9901]	NULL	NULL	NULL	NULL	NULL	NULL	0.0661958	10450.1	NULL	10104.3	11581.8	9517.46	9357.14	10735.4	10021.3	9599.35	10501.9	11135.8	10686.3	11557	10500	10553.4
PR_86654		NULL	NULL	NULL	NULL	NULL	NULL	0.0866664	10428.5	NULL	11875.8	9446.31	10578.6	10924.7	10815.7	9408.82	10839.9	9099.16	11227.4	9099.3	10031.6	11690	10533.2
PR_74899		NULL	NULL	NULL	NULL	NULL	NULL	0.0792827	10418.7	NULL	9521.23	12253.8	10353.4	9864.31	10216.1	10922.1	10449.1	11470.1	10393.4	11031	8900.78	10097.5	9969.77
PR_71850	thioredoxin peroxidase [Phytophthora infestans]	NULL	GO:0003674_GO:0003824_GO:0016209_GO:0016491	NULL	NULL	NULL	NULL	0.10071	10388.9	NULL	10266.7	8500.66	10647.2	11883	8553.66	9835.19	10041	10380	10030.7	10709.6	12093.3	11570	10544.5
PR_93768	predicted protein [Physcomitrella patens subsp. patens]	NULL	NULL	NULL	NULL	NULL	NULL	0.0703179	10336	NULL	9994.61	10861.1	10695	8607.86	10768.2	9952.45	10067.5	9775.23	10137.1	10948.1	10509.9	10237.1	11814.2
PR_80479	PREDICTED: similar to CG9706-PA, isoform A [Tribolium castaneum]	NULL	NULL	NULL	NULL	NULL	NULL	0.100818	10259.5	NULL	10318.3	9520.51	10268.8	9688.23	10930.2	10682.8	11097.9	9435.27	10172.5	12569.9	11103.7	8218.12	9367.56
PR_76391		NULL	GO:0006810_GO:0006886_GO:0008104_GO:0008150_GO:0009987_GO:0015031_GO:0033036_GO:0034613_GO:0045184_GO:0046907_GO:0051179_GO:0051234_GO:0051641_GO:0051649	NULL	NULL	NULL	NULL	0.0963043	10159	NULL	10883.8	9406.22	9205.07	9700.64	9449.55	9332.03	9940.34	11039.8	10649.6	10503.1	12791.6	9947.43	9217.69
PR_72623	predicted protein [Physcomitrella patens subsp. patens]	NULL	GO:0003674_GO:0003824_GO:0004221_GO:0006464_GO:0006508_GO:0006511_GO:0008150_GO:0008152_GO:0009056_GO:0009057_GO:0009987_GO:0016787_GO:0016788_GO:0016790_GO:0019538_GO:0019941_GO:0030163_GO:0034960_GO:0034962_GO:0043170_GO:0043283_GO:0043285_GO:0043412_GO:0043632_GO:0044237_GO:0044238_GO:0044248_GO:0044257_GO:0044260_GO:0044265_GO:0044267_GO:0051603	NULL	NULL	NULL	NULL	0.0732266	10126.1	NULL	9124.06	9167.26	11398.4	10369.4	9481.43	11167.5	10089.5	9931.93	10412.2	10287.1	9873.64	9211.37	11125.6
PR_38740	26S proteasome regulatory subunit 8 [Pinus taeda]	NULL	GO:0000166_GO:0003674_GO:0003824_GO:0005488_GO:0005524_GO:0006139_GO:0008150_GO:0008152_GO:0009987_GO:0016301_GO:0016462_GO:0016740_GO:0016772_GO:0016787_GO:0016817_GO:0016818_GO:0017076_GO:0017111_GO:0019205_GO:0030554_GO:0032553_GO:0032555_GO:0032559_GO:0044237_GO:0044238	NULL	NULL	NULL	NULL	0.0637177	10106.6	NULL	9126.76	10718.9	10195.6	9516.5	9475.98	10790.8	9195.6	10430.9	9835.77	10394.5	10366.9	9946.32	11390.9
PR_84567	START domain-containing protein [Poa pratensis]	NULL	GO:0000166_GO:0003674_GO:0003676_GO:0003677_GO:0003824_GO:0003916_GO:0003918_GO:0005488_GO:0005524_GO:0005575_GO:0005622_GO:0005623_GO:0005694_GO:0006139_GO:0006259_GO:0006265_GO:0008150_GO:0008152_GO:0009987_GO:0016853_GO:0017076_GO:0030554_GO:0032553_GO:0032555_GO:0032559_GO:0034960_GO:0043170_GO:0043226_GO:0043228_GO:0043229_GO:0043232_GO:0043283_GO:0044237_GO:0044238_GO:0044260_GO:0044424_GO:…	NULL	NULL	NULL	NULL	0.0845572	10073.8	NULL	8466.52	11560.8	9728.59	9169.58	9587.3	10886.7	9331.72	10986.4	10318.7	11170.9	9726	10131.5	9894.31
PR_76428		NULL	NULL	NULL	NULL	NULL	NULL	0.0652441	10017.4	NULL	9856.17	10802.1	10581.4	9853.87	10112.2	9641.16	9122.9	10199.7	10082.4	10036.8	11033.6	8475.71	10427.7
PR_82448		NULL	NULL	NULL	NULL	NULL	NULL	0.096831	10015.5	NULL	9184.61	9608.46	9159.3	11606.7	10272.7	10478	11404.1	11561.4	9499.6	9732.63	9992.84	8378.05	9322.75
PR_87774		TPSI	NULL	TPSI_3075	MuDR_A_B	NULL	NULL	0.0889459	9996.47	NULL	10197.3	10248.8	9080.06	10451.9	9668.64	9579.25	10062.7	10532.5	9487.58	9794.19	9694.06	12513	8644.13
PR_75420		NULL	GO:0000166_GO:0003674_GO:0003824_GO:0003924_GO:0005488_GO:0005525_GO:0016462_GO:0016787_GO:0016817_GO:0016818_GO:0017076_GO:0017111_GO:0019001_GO:0032553_GO:0032555_GO:0032561	NULL	NULL	NULL	NULL	0.0956732	9994.59	NULL	10298.3	9967.18	11142.8	10377.9	8961.98	9159.16	8576.35	10223.7	9801.81	9315.7	12335	9384.6	10385.3
PR_82779	PREDICTED: similar to thyroid hormone receptor interactor 12 isoform 6 [Canis familiaris]	NULL	GO:0003674_GO:0003824_GO:0005575_GO:0005622_GO:0005623_GO:0006464_GO:0008150_GO:0008152_GO:0009987_GO:0016874_GO:0016879_GO:0016881_GO:0019538_GO:0034960_GO:0043170_GO:0043283_GO:0043412_GO:0044237_GO:0044238_GO:0044260_GO:0044267_GO:0044464	NULL	NULL	NULL	NULL	0.0839235	9990.64	NULL	8806.49	10469	10200.8	10913.5	10439.8	10116.5	9510.95	10854.3	10598.6	9988.99	8449.73	8630.72	10899.1
PR_72774		NULL	NULL	NULL	NULL	NULL	NULL	0.097451	9988.93	NULL	12275.1	11135.1	11158	9803.63	9560.05	9291.3	8389.37	9391.53	10063.7	10003.6	9432.94	9301.64	10050.1
PR_79176	Unknown protein [Oryza sativa (japonica cultivar-group)]	NULL	NULL	NULL	NULL	NULL	NULL	0.0896862	9953.37	NULL	10437.5	12591.1	9420.28	9834.34	8718.87	10418.1	9543.92	9899.41	10133.2	9404.93	9170.86	9842.15	9979.04
PR_84122	BAP28 protein [Mus musculus]	NULL	GO:0003674_GO:0005215_GO:0005575_GO:0005623_GO:0006810_GO:0008150_GO:0030288_GO:0030312_GO:0030313_GO:0031975_GO:0042597_GO:0044462_GO:0044464_GO:0051179_GO:0051234	NULL	NULL	NULL	NULL	0.0984187	9912.76	NULL	10347	10632.6	10142.7	11004.2	10481.5	10817.7	8858.86	8183.45	8280.17	8890.44	10483.7	9771.42	10972.2
PR_71904	Os03g0227000 [Oryza sativa (japonica cultivar-group)]	NULL	GO:0003674_GO:0005488_GO:0005515_GO:0005575_GO:0005622_GO:0005623_GO:0005737_GO:0006810_GO:0006886_GO:0008104_GO:0008150_GO:0009987_GO:0015031_GO:0016020_GO:0016192_GO:0030117_GO:0032991_GO:0033036_GO:0034613_GO:0043234_GO:0044424_GO:0044425_GO:0044444_GO:0044464_GO:0045184_GO:0046907_GO:0048475_GO:0051179_GO:0051234_GO:0051641_GO:0051649	NULL	NULL	NULL	NULL	0.0967459	9824.29	NULL	8626.68	10427.1	8901.7	9419.67	9247.6	10083.5	8770.13	11000.7	11202.8	10726.2	9483.84	8649.79	11176
PR_85385		NULL	GO:0003674_GO:0003676_GO:0003677_GO:0003700_GO:0005488_GO:0005515_GO:0005575_GO:0005622_GO:0005623_GO:0005634_GO:0006355_GO:0008150_GO:0008270_GO:0009889_GO:0010468_GO:0010556_GO:0019219_GO:0019222_GO:0030528_GO:0031323_GO:0031326_GO:0043167_GO:0043169_GO:0043226_GO:0043227_GO:0043229_GO:0043231_GO:0043565_GO:0044424_GO:0044464_GO:0045449_GO:0046872_GO:0046914_GO:0050789_GO:0050794_GO:0051252_GO:…	NULL	NULL	NULL	NULL	0.0925168	9774.97	NULL	9390.21	10627.4	11756.7	11007.8	9714.16	9439.58	9929.56	9613.89	9343.38	9253.98	9138.02	7967.49	9892.38
PR_71975	PREDICTED: similar to ATP-binding cassette, sub-family F, member 2 isoform b isoform 6 [Canis familiaris]	NULL	GO:0000166_GO:0003674_GO:0003824_GO:0005488_GO:0005524_GO:0016462_GO:0016787_GO:0016817_GO:0016818_GO:0016887_GO:0017076_GO:0017111_GO:0030554_GO:0032553_GO:0032555_GO:0032559	NULL	NULL	NULL	NULL	0.0987379	9706.62	NULL	9875.06	7986.59	9609.86	9835.82	10067.9	8689.94	10257.5	9056.01	8975.75	9534.13	12042.1	9551.39	10703.9
PR_76575		NULL	NULL	NULL	NULL	NULL	NULL	0.0887613	9669.38	NULL	10903.1	10539.2	10446.4	10489.7	10387.7	8355.98	9529.7	9562.44	9285.72	9878.3	8093.57	9594.51	8635.46
PR_87237		NULL	NULL	NULL	NULL	NULL	NULL	0.0839935	9630.53	NULL	8458.49	9198.19	10918.2	10169.8	9227.8	10092.5	10476.1	9600.34	10439	10265.5	9142.05	8102.47	9106.44
PR_71687	putative RNA helicase [Phytophthora infestans]	NULL	GO:0000166_GO:0003674_GO:0003676_GO:0003824_GO:0004386_GO:0005488_GO:0005524_GO:0008026_GO:0016462_GO:0016787_GO:0016817_GO:0016818_GO:0016887_GO:0017076_GO:0017111_GO:0030554_GO:0032553_GO:0032555_GO:0032559_GO:0042623_GO:0070035	NULL	NULL	NULL	NULL	0.0764973	9506.55	NULL	9450.22	11289.4	9602.93	9849.09	9072.16	10032	8626.15	9420.2	8684.73	10386	9259.02	8637.03	9276.18
PR_76583	translation initiation factor IF-2 [Marinobacter aquaeolei VT8]	NULL	GO:0000166_GO:0003674_GO:0003676_GO:0003743_GO:0003824_GO:0003924_GO:0005488_GO:0005525_GO:0005575_GO:0005622_GO:0005623_GO:0006412_GO:0006413_GO:0008135_GO:0008150_GO:0008152_GO:0009058_GO:0009059_GO:0009987_GO:0010467_GO:0016462_GO:0016787_GO:0016817_GO:0016818_GO:0017076_GO:0017111_GO:0019001_GO:0019538_GO:0032553_GO:0032555_GO:0032561_GO:0034645_GO:0034960_GO:0034961_GO:0043170_GO:0043283_GO:…	NULL	NULL	NULL	NULL	0.102063	9482.18	NULL	9911.59	8236.69	9496.76	10699.3	10117	10510.1	8097.13	9451.77	8624.01	7687.7	10393.7	9696.44	10346.1
PR_82228	thiamin pyrophosphokinase, putative [Arabidopsis thaliana]	NULL	GO:0000166_GO:0003674_GO:0003824_GO:0004788_GO:0005488_GO:0005524_GO:0006732_GO:0006766_GO:0006767_GO:0008150_GO:0008152_GO:0009058_GO:0009108_GO:0009229_GO:0009987_GO:0016740_GO:0016772_GO:0016778_GO:0017076_GO:0030554_GO:0032553_GO:0032555_GO:0032559_GO:0042357_GO:0042723_GO:0042724_GO:0044237_GO:0044249_GO:0051186_GO:0051188	NULL	NULL	NULL	NULL	0.0868687	9461.08	NULL	8135.97	10204.1	11268.6	9127.41	9364.39	10061.8	9433.73	8814.22	9189.64	8684.19	10355.9	9754.01	8599.99
PR_94123		NULL	NULL	NULL	NULL	NULL	NULL	0.0716558	9431.43	NULL	11039.4	8980.89	8283.28	9790.05	8450.03	10088.6	9194.73	9903.11	9439.91	9311.48	9387.46	9323.02	9416.54
PR_80472	Human ALC1, SNF2 family DNA-dependent ATPase [Physcomitrella patens subsp. patens]	NULL	GO:0000166_GO:0003674_GO:0003676_GO:0003677_GO:0003824_GO:0004386_GO:0005488_GO:0005524_GO:0005575_GO:0005622_GO:0005623_GO:0005634_GO:0016462_GO:0016787_GO:0016817_GO:0016818_GO:0017076_GO:0017111_GO:0030554_GO:0032553_GO:0032555_GO:0032559_GO:0043226_GO:0043227_GO:0043229_GO:0043231_GO:0044424_GO:0044464	NULL	NULL	NULL	NULL	0.0938047	9380.79	NULL	9891.72	8919.94	9885.83	10860.1	9777.81	8880.87	10217.5	9617.99	9660.96	8232.54	7378.17	8779.98	9846.95
PR_49643	PREDICTED: similar to UDP-glucose pyrophosphorylase [Strongylocentrotus purpuratus]	NULL	GO:0003674_GO:0003824_GO:0008150_GO:0008152_GO:0016740_GO:0016772_GO:0016779	NULL	NULL	NULL	NULL	0.101481	9354.34	NULL	9150.43	9004.5	10937.8	10469.2	10302.4	9791.34	9342.81	9488.4	8357.4	8177.59	8846.68	10207.8	7530.05
PR_79631	predicted protein [Nematostella vectensis]	NULL	GO:0003674_GO:0003824_GO:0005215_GO:0005216_GO:0005244_GO:0005247_GO:0005253_GO:0005254_GO:0005575_GO:0005623_GO:0006810_GO:0006811_GO:0006820_GO:0006821_GO:0008150_GO:0008152_GO:0008308_GO:0008509_GO:0015075_GO:0015267_GO:0015698_GO:0016020_GO:0016491_GO:0022803_GO:0022832_GO:0022836_GO:0022838_GO:0022857_GO:0022891_GO:0022892_GO:0044464_GO:0051179_GO:0051234_GO:0055114	NULL	NULL	NULL	NULL	0.0987519	9253.85	NULL	8965.63	8361.11	10002.6	9792.9	10071.7	8421.05	9507.86	8825.54	9466.17	7856.32	8351.9	9254.84	11422.5
PR_82000		NULL	NULL	NULL	NULL	NULL	NULL	0.100334	9232.45	NULL	8810.99	9606.39	7827.59	7493.79	8972.66	10881.5	9239.9	9669.97	9209.18	10079	8250.01	10115.2	9865.77
PR_81770		NULL	GO:0003674_GO:0005488_GO:0005515_GO:0008270_GO:0043167_GO:0043169_GO:0046872_GO:0046914	NULL	NULL	NULL	NULL	0.0923082	9230.21	NULL	9354.43	7959.42	8185.58	9598.02	8999.99	10082.3	9271.63	10400.9	10710	9304.47	9588.6	7910.84	8626.49
PR_95565		NULL	NULL	NULL	NULL	NULL	NULL	0.0837469	9194.24	NULL	11004.6	8119.66	9580.2	10100.7	9347.77	8527.46	9278.56	8515.78	9107.36	8731.9	9887.85	8884.43	8438.85
PR_71370	uninitiated CG4008-PA [Drosophila melanogaster]	NULL	GO:0003674_GO:0003824_GO:0004177_GO:0006508_GO:0008150_GO:0008152_GO:0008233_GO:0008235_GO:0008237_GO:0008238_GO:0009987_GO:0016787_GO:0019538_GO:0034960_GO:0043170_GO:0043283_GO:0044237_GO:0044238_GO:0044260_GO:0044267_GO:0070011	NULL	NULL	NULL	NULL	0.095082	9172.55	NULL	9192.36	9774.24	9147.47	6855.75	9038.14	9131.44	8645.08	8938.01	9075.19	11017.8	9397.82	9285.78	9744.11
PR_79807	PREDICTED: similar to ARE1 [Danio rerio]	NULL	NULL	NULL	NULL	NULL	NULL	0.0901382	9157.53	NULL	10613.3	10946.9	9159.66	9775.26	8552.43	8870.64	8683.83	8500.36	8686.53	9247.02	9518.19	8120.8	8373
PR_94094		NULL	NULL	NULL	NULL	NULL	NULL	0.0964032	9062.14	NULL	8413.5	10199.5	8496.75	8654.38	11272.8	8569.8	9620.95	8416.54	8707.29	7908.72	9331.39	8701.98	9514.24
PR_79370	Ariadne homolog [Schizosaccharomyces pombe 972h-]	NULL	GO:0003674_GO:0003824_GO:0005488_GO:0005515_GO:0008270_GO:0016874_GO:0016879_GO:0016881_GO:0043167_GO:0043169_GO:0046872_GO:0046914	NULL	NULL	NULL	NULL	0.081168	9017.7	NULL	9026.52	10076.1	10310.1	9489.73	8500.23	9742.49	9052.35	8624.97	8085.99	7729.12	8883.04	9303.74	8405.8
PR_78995		NULL	GO:0003674_GO:0003824_GO:0004221_GO:0005488_GO:0005515_GO:0006508_GO:0006511_GO:0008150_GO:0008152_GO:0009056_GO:0009057_GO:0009987_GO:0016787_GO:0016788_GO:0016790_GO:0019538_GO:0019941_GO:0030163_GO:0034960_GO:0034962_GO:0043170_GO:0043283_GO:0043285_GO:0043632_GO:0044237_GO:0044238_GO:0044248_GO:0044257_GO:0044260_GO:0044265_GO:0044267_GO:0051603	NULL	NULL	NULL	NULL	0.0982101	8984.14	NULL	8996.07	8661.07	8415.52	9014.4	10593	8419.14	9542.92	10563	9234.4	9265.13	8792.64	7307.98	7988.48
PR_79281	predicted protein [Laccaria bicolor S238N-H82]	TPSI	GO:0000166_GO:0003674_GO:0003824_GO:0004672_GO:0004674_GO:0004713_GO:0005488_GO:0005524_GO:0006464_GO:0006468_GO:0006793_GO:0006796_GO:0008150_GO:0008152_GO:0009987_GO:0016301_GO:0016310_GO:0016740_GO:0016772_GO:0016773_GO:0017076_GO:0019538_GO:0030554_GO:0032553_GO:0032555_GO:0032559_GO:0034960_GO:0043170_GO:0043283_GO:0043412_GO:0043687_GO:0044237_GO:0044238_GO:0044260_GO:0044267	TPSI_3955	MuDR_A_B	NULL	NULL	0.100842	8972.96	NULL	10597.4	8465.91	8674.63	10454.6	10405.7	8744.44	8574.55	8667.02	7973.37	8507.22	8093.41	9456.8	8033.42
PR_81944	PREDICTED: similar to inositol polyphosphate 4-phosphatase type I alpha 3 [Danio rerio]	NULL	NULL	NULL	NULL	NULL	NULL	0.0944377	8958.19	NULL	8249.87	9868.11	9296.88	9499.25	9230.07	9353.24	10266.8	9356.54	9109.21	8517.08	6851.1	8781.97	8076.39
PR_93834		NULL	NULL	NULL	NULL	NULL	NULL	0.0885266	8951.69	NULL	9767.34	8879.3	8398.41	9050.05	10127.6	8841.51	10339.3	7541.01	8222.32	7864.14	9226.55	8891.67	9222.77
PR_79141	FKBP-type peptidyl-prolyl cis-trans isomerase [Synechococcus sp. PCC 7002]	NULL	GO:0006457_GO:0008150_GO:0008152_GO:0009987_GO:0019538_GO:0034960_GO:0043170_GO:0043283_GO:0044237_GO:0044238_GO:0044260_GO:0044267	NULL	NULL	NULL	NULL	0.0989945	8899.14	NULL	8677.44	9082.37	8947.15	8671.81	8767.25	9820.81	8715.57	10943.4	7332.46	9228.36	8970.2	9133.02	7399.01
PR_85708		NULL	NULL	NULL	NULL	NULL	NULL	0.0904914	8883.13	NULL	8232.37	9323.31	11068.6	8317.49	8056.78	9151.36	9220.53	9438.6	8535.22	7998.27	8919.77	8132.76	9085.58
PR_86913	short chain dehydrogenase/reductase family [Aspergillus clavatus NRRL 1]	NULL	GO:0003674_GO:0003824_GO:0008150_GO:0008152_GO:0016491	NULL	NULL	NULL	NULL	0.0909637	8864.43	NULL	8195.18	8693.15	9614.19	7797.5	9807.14	8935.29	9524.38	9712.7	7374.22	8832.63	9335.25	9638.96	7776.97
PR_75668	activator of Hsp70 and Hsp90 chaperones [Laccaria bicolor S238N-H82]	NULL	NULL	NULL	NULL	NULL	NULL	0.0974333	8848.98	NULL	9485.87	9442.77	8570.05	7636.67	8258.24	7553.02	9142.4	9745.2	9077.42	10305.3	7711.85	8386.87	9721
PR_42145	cathepsin H [Suberites domuncula]	NULL	GO:0003674_GO:0003824_GO:0004175_GO:0004197_GO:0006508_GO:0008150_GO:0008152_GO:0008233_GO:0008234_GO:0009987_GO:0016787_GO:0019538_GO:0034960_GO:0043170_GO:0043283_GO:0044237_GO:0044238_GO:0044260_GO:0044267_GO:0070011	NULL	NULL	NULL	NULL	0.0634771	8742.41	NULL	8362.64	8101.1	8524.38	8554.19	8921.17	8127.3	7940.64	10031.2	8577.6	9207.79	9089.23	9209.19	9004.94
PR_86782		NULL	NULL	NULL	NULL	NULL	NULL	0.100273	8736.53	NULL	7605.62	9598.96	9054.61	9348.31	7444.48	9916.8	7994.8	8772.08	8891.34	7483.01	9078.9	10124.5	8261.45
PR_93540		NULL	GO:0003674_GO:0003824_GO:0004091_GO:0004806_GO:0006629_GO:0008150_GO:0008152_GO:0016298_GO:0016787_GO:0016788_GO:0044238	NULL	NULL	NULL	NULL	0.0971647	8731.13	NULL	9405.13	9577.48	9595.87	9489.69	8397.89	8413.33	8438.65	9433.71	9063.52	7808.96	9252.49	6672.93	7955.02
PR_78104		NULL	NULL	NULL	NULL	NULL	NULL	0.0921691	8675.38	NULL	8447.84	9534.51	9031.33	8617.41	7294.8	8726.01	7507.54	8859.61	9068.48	8565.9	7727.52	10378.8	9020.18
PR_71888	peptidase D [Gallus gallus]	NULL	GO:0003674_GO:0003824_GO:0004177_GO:0005488_GO:0008150_GO:0008233_GO:0008238_GO:0009987_GO:0016787_GO:0030145_GO:0043167_GO:0043169_GO:0046872_GO:0046914_GO:0070011	NULL	NULL	NULL	NULL	0.101069	8658.78	NULL	8358.94	9019.62	9410.19	8499.5	8311.35	8510.5	8618.97	7934.69	9403.49	10056.7	7104.27	10000.6	7335.27
PR_86527		NULL	NULL	NULL	NULL	NULL	NULL	0.0928716	8593.68	NULL	9540.2	9249.48	8539.29	9145.34	8826.14	9065.35	9171.01	6959.48	7323.32	8362.25	8905.7	9165.73	7464.5
PR_75963	predicted protein [Laccaria bicolor S238N-H82]	NULL	GO:0000166_GO:0003674_GO:0003824_GO:0005488_GO:0006084_GO:0006091_GO:0006099_GO:0006732_GO:0008150_GO:0008152_GO:0009055_GO:0009056_GO:0009060_GO:0009109_GO:0009987_GO:0015980_GO:0016491_GO:0016627_GO:0016740_GO:0017076_GO:0030554_GO:0044237_GO:0044248_GO:0045333_GO:0046356_GO:0048037_GO:0050660_GO:0050662_GO:0051186_GO:0051187	NULL	NULL	NULL	NULL	0.0737215	8576.18	NULL	8716.45	8540.84	8524.63	8936.37	7778.3	8159.72	9544.49	8975.08	8060.18	8043.88	8256.86	7936.59	10017
PR_94006		NULL	NULL	NULL	NULL	NULL	NULL	0.100977	8568.81	NULL	8802.98	7736.13	7200.08	8241.59	9770.86	8534.01	9401.66	7343.98	7760.47	9520.66	9497.12	9441.61	8143.41
PR_40952	COG0318: Acyl-CoA synthetases (AMP-forming)/AMP-acid ligases II [Nostoc punctiforme PCC 73102]	NULL	GO:0003674_GO:0003824_GO:0008150_GO:0008152	NULL	NULL	NULL	NULL	0.100754	8567.43	NULL	8347.27	9355.32	9889.29	7920.88	8711.22	9292.37	7978.07	8981.3	8426.61	9938.74	7140.88	8108.08	7286.54
PR_79274		NULL	NULL	NULL	NULL	NULL	NULL	0.0837913	8566.74	NULL	8523.67	9508.82	9702.6	9270.07	7963.79	8688.87	8412.16	8808.06	8144.68	9126.52	7416.08	7244.61	8557.73
PR_79954		NULL	GO:0003674_GO:0003735_GO:0003824_GO:0005198_GO:0005575_GO:0005622_GO:0005623_GO:0005737_GO:0005840_GO:0006412_GO:0006508_GO:0008150_GO:0008152_GO:0008233_GO:0008237_GO:0009058_GO:0009059_GO:0009987_GO:0010467_GO:0016787_GO:0019538_GO:0030529_GO:0032991_GO:0034645_GO:0034960_GO:0034961_GO:0043170_GO:0043226_GO:0043228_GO:0043229_GO:0043232_GO:0043283_GO:0043284_GO:0044237_GO:0044238_GO:0044249_GO:…	NULL	NULL	NULL	NULL	0.0831004	8560.57	NULL	8357.8	7930.97	9114.69	8961.88	8729.11	7993.64	8228.57	9387.46	8053.44	8874.16	7239.69	8316.14	10099.9
PR_79152	predicted protein [Physcomitrella patens subsp. patens]	NULL	GO:0005575_GO:0005622_GO:0005623_GO:0005634_GO:0006139_GO:0006396_GO:0006397_GO:0008150_GO:0008152_GO:0009987_GO:0010467_GO:0016070_GO:0016071_GO:0034960_GO:0043170_GO:0043226_GO:0043227_GO:0043229_GO:0043231_GO:0043283_GO:0044237_GO:0044238_GO:0044260_GO:0044424_GO:0044464	NULL	NULL	NULL	NULL	0.0800015	8472.83	NULL	8494.27	8543.02	9175.88	8212.63	9550.84	7983.23	8485.37	9139.93	8519.07	8494.72	9000.58	7721.63	6825.64
PR_85169		NULL	GO:0000166_GO:0003674_GO:0003676_GO:0003677_GO:0003824_GO:0004672_GO:0004674_GO:0005488_GO:0005524_GO:0006464_GO:0006468_GO:0006793_GO:0006796_GO:0008150_GO:0008152_GO:0009987_GO:0016301_GO:0016310_GO:0016740_GO:0016772_GO:0016773_GO:0017076_GO:0019538_GO:0030554_GO:0032553_GO:0032555_GO:0032559_GO:0034960_GO:0043170_GO:0043283_GO:0043412_GO:0043687_GO:0044237_GO:0044238_GO:0044260_GO:0044267	NULL	NULL	NULL	NULL	0.0737131	8452.42	NULL	9926.24	8314.25	7544.54	8846.15	7333.06	8188.72	8450.71	8693.24	8868.1	8410.91	8328.66	8099.17	8877.77
PR_75680	protein kinase C substrate 80K-H [Mus musculus]	NULL	GO:0003674_GO:0005488_GO:0005515	NULL	NULL	NULL	NULL	0.0812711	8400.49	NULL	8250.85	8267.99	9497.78	8683.56	8512.59	8409.75	8519.44	8596.54	8294.84	9259	7015.27	7056.08	8842.64
PR_73320		NULL	GO:0003674_GO:0003676_GO:0003677_GO:0003824_GO:0004175_GO:0004197_GO:0005488_GO:0006508_GO:0008150_GO:0008152_GO:0008233_GO:0008234_GO:0009987_GO:0016787_GO:0019538_GO:0034960_GO:0043170_GO:0043283_GO:0044237_GO:0044238_GO:0044260_GO:0044267_GO:0070011	NULL	NULL	NULL	NULL	0.101647	8320.45	NULL	8006.69	7816.82	8092.2	9517.31	8473.16	6720.69	8384.12	7914.69	9430.63	7468.67	8660.07	9864.32	7816.49
PR_73909		NULL	GO:0003674_GO:0003824_GO:0005575_GO:0005622_GO:0005623_GO:0006464_GO:0008150_GO:0008152_GO:0009987_GO:0016874_GO:0016879_GO:0016881_GO:0019538_GO:0034960_GO:0043170_GO:0043283_GO:0043412_GO:0044237_GO:0044238_GO:0044260_GO:0044267_GO:0044464	NULL	NULL	NULL	NULL	0.0757127	8268.68	NULL	8322.52	8503.85	8700.22	9093.25	7752.74	9029.94	8333.46	8513.01	8923.45	7206.67	7247.27	7466.19	8400.27
PR_74210		NULL	NULL	NULL	NULL	NULL	NULL	0.0797567	8229.77	NULL	7638.26	7696.74	7352.06	8342.54	8912.61	8773.31	8736.39	8174.95	7815.06	7774.31	9060.85	9370.09	7339.88
PR_74401		NULL	NULL	NULL	NULL	NULL	NULL	0.0845113	8224.37	NULL	8837.59	8671.74	7500.22	7718.55	7373.72	8376.76	7013.25	7807.25	8216.44	8637.78	9688.74	8648.93	8425.87
PR_80640	predicted protein [Physcomitrella patens subsp. patens]	NULL	GO:0003674_GO:0003824_GO:0004721_GO:0004725_GO:0006464_GO:0006470_GO:0006793_GO:0006796_GO:0008150_GO:0008152_GO:0009987_GO:0016311_GO:0016787_GO:0016788_GO:0016791_GO:0019538_GO:0034960_GO:0042578_GO:0043170_GO:0043283_GO:0043412_GO:0043687_GO:0044237_GO:0044238_GO:0044260_GO:0044267	NULL	NULL	NULL	NULL	0.0927055	8209.56	NULL	7855.68	8625.95	8680.61	9619.52	7735.84	8598.47	8015.72	8401.27	8430.72	8543.27	8682.58	6884.56	6650.12
PR_75301		NULL	GO:0003674_GO:0003676_GO:0005488	NULL	NULL	NULL	NULL	0.0946378	8182.13	NULL	8868.51	8011.8	7239.42	9170.82	8333.53	7398.48	8648.68	8384.05	9289.65	7071.09	8926.18	6954.96	8070.57
PR_75901		NULL	NULL	NULL	NULL	NULL	NULL	0.0835959	8126.76	NULL	8262.8	8682.45	8157.74	7941.27	8653.43	8849.84	6751.13	8685.9	8736.7	8405.05	8316.22	6945.79	7259.57
PR_76796		NULL	GO:0003674_GO:0005488_GO:0005515	NULL	NULL	NULL	NULL	0.0898411	8110.41	NULL	7358.75	8202.21	8821.73	9325.02	9633.53	7997.28	7657.11	7904.22	7359.93	7595.67	8148.72	7156.44	8274.74
PR_79004		NULL	NULL	NULL	NULL	NULL	NULL	0.0951376	8084.24	NULL	7883.6	8414.04	9235.62	9054.08	7075.54	7680.25	7738.83	8733.16	8404.91	8460.06	6481.99	8564.29	7368.79
PR_71277	prolyl oligopeptidase [Arabidopsis thaliana]	NULL	GO:0003674_GO:0003824_GO:0004175_GO:0004252_GO:0006508_GO:0008150_GO:0008152_GO:0008233_GO:0008236_GO:0009987_GO:0016787_GO:0017171_GO:0019538_GO:0034960_GO:0043170_GO:0043283_GO:0044237_GO:0044238_GO:0044260_GO:0044267_GO:0070011	NULL	NULL	NULL	NULL	0.0631088	8051.63	NULL	7915.54	7197.3	7937.89	7886.86	8681.58	7344.09	9146.08	8292.88	8276.3	8026.95	7505.12	8252.26	8208.36
PR_72687		NULL	GO:0003674_GO:0003824_GO:0008150_GO:0008152	NULL	NULL	NULL	NULL	0.0986909	8006.32	NULL	9999.17	7940.5	7769.81	8427.34	8789.41	8394.33	7436.91	7705.79	7504.78	6801.31	8113.72	7015.16	8183.91
PR_74647		NULL	GO:0003674_GO:0005488_GO:0005509_GO:0043167_GO:0043169_GO:0046872	NULL	NULL	NULL	NULL	0.100396	7993.72	NULL	7756.83	9228.23	8147.87	7429.65	7820.12	8906.86	9143.85	6635.64	8469.51	6882.3	7122.5	8436.43	7938.54
PR_74597		NULL	GO:0003674_GO:0005488_GO:0005575_GO:0005622_GO:0005623_GO:0008270_GO:0043167_GO:0043169_GO:0044464_GO:0046872_GO:0046914	NULL	NULL	NULL	NULL	0.0814467	7969.55	NULL	8054.27	9093.69	7458.36	8035.39	9091.42	7493.85	7672.08	8340.23	7328.99	7111.53	7733.12	7390.06	8801.21
PR_73975	inositol acyltransferase [Chlamydomonas reinhardtii]	NULL	GO:0003674_GO:0003824_GO:0005575_GO:0005622_GO:0005623_GO:0005737_GO:0005783_GO:0005789_GO:0006464_GO:0006497_GO:0006505_GO:0006506_GO:0006629_GO:0006643_GO:0006644_GO:0006650_GO:0008150_GO:0008152_GO:0008610_GO:0008654_GO:0009058_GO:0009059_GO:0009987_GO:0012505_GO:0016020_GO:0016021_GO:0016740_GO:0016746_GO:0019538_GO:0030384_GO:0031090_GO:0031224_GO:0034645_GO:0034960_GO:0042157_GO:0042158_GO:…	NULL	NULL	NULL	NULL	0.0522955	7942.21	NULL	8483.2	7687.25	7568.78	8194.9	7987.18	7956.95	7947.87	7394.12	7668.82	7816.44	7897	9028.87	7617.36
PR_73883	soluble pyridine nucleotide transhydrogenase [Acidobacteria bacterium Ellin345]	NULL	GO:0000166_GO:0003674_GO:0003824_GO:0004601_GO:0005488_GO:0005506_GO:0005575_GO:0005622_GO:0005623_GO:0005737_GO:0006950_GO:0006979_GO:0008150_GO:0009055_GO:0009987_GO:0016209_GO:0016491_GO:0016684_GO:0017076_GO:0019725_GO:0020037_GO:0030554_GO:0042221_GO:0042592_GO:0043167_GO:0043169_GO:0044424_GO:0044464_GO:0045454_GO:0046872_GO:0046906_GO:0046914_GO:0048037_GO:0050660_GO:0050662_GO:0050789_GO:…	NULL	NULL	NULL	NULL	0.0869347	7912.4	NULL	8247.66	8697.79	8660.65	7978.09	6868.55	7192.54	7809.24	7676.34	7431	9478.41	7281.95	7594.93	7944.02
PR_74991	putative short-chain dehydrogenase [Rhizobium leguminosarum bv. viciae 3841]	NULL	GO:0003674_GO:0003824_GO:0005575_GO:0005622_GO:0005623_GO:0005737_GO:0005777_GO:0008150_GO:0008152_GO:0016020_GO:0016491_GO:0042579_GO:0043226_GO:0043227_GO:0043229_GO:0043231_GO:0044424_GO:0044444_GO:0044464	NULL	NULL	NULL	NULL	0.0696681	7893.71	NULL	8740.87	8420.36	7464.24	8300.47	7845.01	8600.4	7690.98	7091.93	8133.48	8264.29	7808.27	7249.77	7008.17
PR_73509		NULL	NULL	NULL	NULL	NULL	NULL	0.100616	7852.88	NULL	7568.49	8951.7	8836.34	7730.2	6181.42	8109.46	6452.36	8375.79	8469.04	8088.99	8088.85	7344.53	7890.33
PR_43567	predicted protein [Physcomitrella patens subsp. patens]	NULL	GO:0003674_GO:0003824_GO:0005575_GO:0005623_GO:0006629_GO:0006643_GO:0006644_GO:0008150_GO:0008152_GO:0008610_GO:0008654_GO:0009058_GO:0009987_GO:0016020_GO:0016740_GO:0016772_GO:0016780_GO:0044237_GO:0044238_GO:0044249_GO:0044255_GO:0044464_GO:0046467	NULL	NULL	NULL	NULL	0.10062	7820.65	NULL	8246.82	7835.55	8319.86	8164.29	8208.97	8146.15	8152.23	7232.53	6432.09	6706.46	9413.97	6798.9	8010.58
PR_95409	predicted protein [Laccaria bicolor S238N-H82]	NULL	GO:0000166_GO:0003674_GO:0003824_GO:0005488_GO:0005524_GO:0016462_GO:0016787_GO:0016817_GO:0016818_GO:0017076_GO:0017111_GO:0030554_GO:0032553_GO:0032555_GO:0032559	NULL	NULL	NULL	NULL	0.0809489	7755.63	NULL	7692.86	6508.78	7017.91	8110.06	8247.26	8126.14	7790.12	7899.33	8581.9	7718.95	8186.76	8326.94	6616.2
PR_78709		NULL	NULL	NULL	NULL	NULL	NULL	0.101335	7722.14	NULL	7739.75	8167.6	7815.48	9158.73	6843.18	7810.94	6774.06	6854.46	6899.73	9052.89	7103.48	8371.47	7796.01
PR_85221		NULL	NULL	NULL	NULL	NULL	NULL	0.0821052	7692.72	NULL	8317.34	8616.06	7775.15	7496.22	6491.13	8615.87	7646.95	7918.26	7391.6	7949.43	6515.6	7650.06	7621.67
PR_73189		NULL	NULL	NULL	NULL	NULL	NULL	0.0943447	7670.71	NULL	7926.89	7585.38	8792.41	8434.57	8374.9	6962.35	8114.58	7956.24	8282.74	6997.12	6339.52	7138.78	6813.77
PR_85031	predicted protein [Physcomitrella patens subsp. patens]	NULL	GO:0003674_GO:0003755_GO:0003824_GO:0008150_GO:0009055_GO:0009987_GO:0015035_GO:0015036_GO:0016491_GO:0016667_GO:0016853_GO:0016859_GO:0019725_GO:0042592_GO:0045454_GO:0050789_GO:0050794_GO:0065007_GO:0065008	NULL	NULL	NULL	NULL	0.0757993	7648.05	NULL	6988.38	7659.05	7545.62	7520.84	7431.56	7599.02	6948.79	8752.29	8444.35	8360.15	6694.66	7942.88	7537
PR_45397	Os05g0159000 [Oryza sativa (japonica cultivar-group)]	NULL	GO:0003674_GO:0003824_GO:0005575_GO:0005622_GO:0005623_GO:0006464_GO:0008150_GO:0008152_GO:0009987_GO:0016874_GO:0016879_GO:0016881_GO:0019538_GO:0034960_GO:0043170_GO:0043283_GO:0043412_GO:0044237_GO:0044238_GO:0044260_GO:0044267_GO:0044464	NULL	NULL	NULL	NULL	0.0916414	7510.5	NULL	8427.82	7565.62	7974.27	7845.88	8564.39	8015.19	7620.19	7100.6	7850.79	7143.32	6720.53	6646.08	6161.81
PR_51228	signal recognition particle receptor protein [Cucumis sativus]	NULL	GO:0000166_GO:0003674_GO:0003824_GO:0003924_GO:0005047_GO:0005488_GO:0005525_GO:0005575_GO:0005622_GO:0005623_GO:0005737_GO:0005783_GO:0005785_GO:0005789_GO:0005791_GO:0006605_GO:0006612_GO:0006613_GO:0006614_GO:0006810_GO:0006886_GO:0008104_GO:0008150_GO:0009987_GO:0012505_GO:0015031_GO:0016020_GO:0016462_GO:0016787_GO:0016817_GO:0016818_GO:0017076_GO:0017111_GO:0019001_GO:0030867_GO:0031090_GO:…	NULL	NULL	NULL	NULL	0.0828353	7488.94	NULL	7291.89	8946.92	7165.58	6285.62	8079.95	7027.01	6954.55	7616.52	7467.15	7156.06	7884.65	7623.65	7856.64
PR_83362		NULL	NULL	NULL	NULL	NULL	NULL	0.0628512	7461.84	NULL	6955.09	7802.73	7948.35	7301.05	7187.59	8387.24	7356.84	7693.92	6863.15	7954.78	6967.63	7695.54	6889.98
PR_74960		NULL	NULL	NULL	NULL	NULL	NULL	0.0896542	7427.49	NULL	7383.54	7684.4	7978.77	7162.17	6809.39	6847.04	8622.49	7111.87	6907.64	7163.41	7299.57	8900.67	6686.43
PR_95613	TTK family protein kinase [Dictyostelium discoideum AX4]	NULL	GO:0000166_GO:0003674_GO:0003824_GO:0004672_GO:0004674_GO:0004713_GO:0005488_GO:0005524_GO:0006464_GO:0006468_GO:0006793_GO:0006796_GO:0008150_GO:0008152_GO:0009987_GO:0016301_GO:0016310_GO:0016740_GO:0016772_GO:0016773_GO:0017076_GO:0019538_GO:0030554_GO:0032553_GO:0032555_GO:0032559_GO:0034960_GO:0043170_GO:0043283_GO:0043412_GO:0043687_GO:0044237_GO:0044238_GO:0044260_GO:0044267	NULL	NULL	NULL	NULL	0.0995615	7412.76	NULL	6433.14	7158.95	8017.16	7857.85	8055.36	7166.71	8393.04	7561.12	7497.81	6427.48	5853.11	7952.19	7991.92
PR_94505	ER lumen protein retaining receptor [Plasmodium berghei strain ANKA]	NULL	GO:0003674_GO:0005048_GO:0005488_GO:0005575_GO:0005623_GO:0006621_GO:0008104_GO:0008150_GO:0009987_GO:0016020_GO:0016021_GO:0031224_GO:0032507_GO:0033036_GO:0042277_GO:0044425_GO:0044464_GO:0045185_GO:0046923_GO:0051179_GO:0051235_GO:0051641_GO:0051651_GO:0065007_GO:0065008	NULL	NULL	NULL	NULL	0.0882048	7397.8	NULL	7178.44	7520.31	7010.57	8162.81	6512.04	7791.17	6800.18	7065.05	7492.9	7663.26	7264.08	6669.15	9041.39
PR_79154	predicted protein [Monosiga brevicollis MX1]	NULL	GO:0000166_GO:0003674_GO:0003824_GO:0004672_GO:0004674_GO:0004713_GO:0005488_GO:0005524_GO:0006464_GO:0006468_GO:0006793_GO:0006796_GO:0008150_GO:0008152_GO:0008270_GO:0009987_GO:0016301_GO:0016310_GO:0016740_GO:0016772_GO:0016773_GO:0017076_GO:0019538_GO:0030554_GO:0032553_GO:0032555_GO:0032559_GO:0034960_GO:0043167_GO:0043169_GO:0043170_GO:0043283_GO:0043412_GO:0043687_GO:0044237_GO:0044238_GO:…	NULL	NULL	NULL	NULL	0.0812024	7290.24	NULL	7723.27	7593.97	7485.6	8187.76	7537.29	7051.44	7925.97	7103.08	6736.37	5964.04	6640.53	7834.85	6988.94
PR_81486	putative serine/threonine protein kinase [Schizophyllum commune]	NULL	GO:0000166_GO:0003674_GO:0003824_GO:0004672_GO:0004674_GO:0004713_GO:0005488_GO:0005524_GO:0006464_GO:0006468_GO:0006793_GO:0006796_GO:0008150_GO:0008152_GO:0009987_GO:0016301_GO:0016310_GO:0016740_GO:0016772_GO:0016773_GO:0017076_GO:0019538_GO:0030554_GO:0032553_GO:0032555_GO:0032559_GO:0034960_GO:0043170_GO:0043283_GO:0043412_GO:0043687_GO:0044237_GO:0044238_GO:0044260_GO:0044267	NULL	NULL	NULL	NULL	0.0779288	7289.18	NULL	7254.1	7828.08	8123.47	7829.35	6846.88	8280.66	7356.68	7062.01	6501.72	6419.61	6897.74	6927.66	7431.32
PR_72138	predicted protein [Ostreococcus lucimarinus CCE9901]	NULL	NULL	NULL	NULL	NULL	NULL	0.0975414	7274.94	NULL	6710.89	8309.84	6716.86	6517.79	6709.44	7229.85	6823.61	7454.33	7862.25	7886.39	8255.33	8031.71	6065.9
PR_95574	predicted protein [Physcomitrella patens subsp. patens]	NULL	GO:0000166_GO:0003674_GO:0003824_GO:0005488_GO:0005509_GO:0005524_GO:0006464_GO:0008150_GO:0008152_GO:0008270_GO:0008641_GO:0009987_GO:0017076_GO:0019538_GO:0030554_GO:0032553_GO:0032555_GO:0032559_GO:0034960_GO:0043167_GO:0043169_GO:0043170_GO:0043283_GO:0043412_GO:0044237_GO:0044238_GO:0044260_GO:0044267_GO:0046872_GO:0046914	NULL	NULL	NULL	NULL	0.0994095	7245.66	NULL	6598.21	6927.25	7505.78	7961.81	7553.86	6728.51	8342.72	7106.73	7556.8	6235.56	6444.27	6609.91	8622.13
PR_84076		NULL	GO:0003674_GO:0003824_GO:0005488_GO:0005506_GO:0008150_GO:0008152_GO:0016491_GO:0016705_GO:0016706_GO:0019538_GO:0043167_GO:0043169_GO:0043170_GO:0043283_GO:0044238_GO:0046872_GO:0046914	NULL	NULL	NULL	NULL	0.0603676	7186.24	NULL	7098.87	7587.03	8017.62	7036.13	6188.29	7360	7564.11	7195.24	7020.22	7314.6	7089.74	7330.08	6619.17
PR_72625		NULL	NULL	NULL	NULL	NULL	NULL	0.0830651	7184.48	NULL	7380.75	7459.15	7998.18	7823.2	7560.52	7146.35	7546.74	6437.7	6848.59	5744.56	6859.22	6911.3	7681.96
PR_84954	FOG: GGDEF domain protein [Parvularcula bermudensis HTCC2503]	NULL	GO:0003674_GO:0005488_GO:0008270_GO:0043167_GO:0043169_GO:0046872_GO:0046914	NULL	NULL	NULL	NULL	0.0839497	7176.91	NULL	6741.22	6964.43	6180.48	6361.35	6950.33	7060.76	7563.85	7698.12	8086.74	8279.09	6767.07	7531.16	7115.17
PR_79554		NULL	NULL	NULL	NULL	NULL	NULL	0.0761438	7149.11	NULL	6981.53	7399.88	6716.22	6264.55	6878.2	7418.81	6282.36	7319.8	7608.23	8049.43	7921.02	7386.64	6711.72
PR_81359		NULL	NULL	NULL	NULL	NULL	NULL	0.10072	7142.27	NULL	6776.55	8301.18	7322.61	6406.06	7633.59	7208.22	6679.99	7843.25	8126.15	7206.55	6016.39	7381.77	5947.21
PR_84027	CDP-diacylglycerol-inositol 3-phosphatidyltransferase [Cryptococcus neoformans var. neoformans JEC21]	NULL	GO:0003674_GO:0003824_GO:0005575_GO:0005623_GO:0006629_GO:0006643_GO:0006644_GO:0008150_GO:0008152_GO:0008610_GO:0008654_GO:0009058_GO:0009987_GO:0016020_GO:0016740_GO:0016772_GO:0016780_GO:0044237_GO:0044238_GO:0044249_GO:0044255_GO:0044464_GO:0046467	NULL	NULL	NULL	NULL	0.101782	7114	NULL	7283.46	5585.92	6135.13	6843.86	7600.14	7167.27	7535.06	6669.92	7218.42	7755.8	8611.07	7294.55	6781.43
PR_50840		NULL	GO:0000166_GO:0003674_GO:0003824_GO:0004672_GO:0004674_GO:0004713_GO:0005488_GO:0005524_GO:0006464_GO:0006468_GO:0006793_GO:0006796_GO:0008150_GO:0008152_GO:0009987_GO:0016301_GO:0016310_GO:0016740_GO:0016772_GO:0016773_GO:0017076_GO:0019538_GO:0030554_GO:0032553_GO:0032555_GO:0032559_GO:0034960_GO:0043170_GO:0043283_GO:0043412_GO:0043687_GO:0044237_GO:0044238_GO:0044260_GO:0044267	NULL	NULL	NULL	NULL	0.0919779	7081.3	NULL	5786.68	7178.6	7052.55	6324.79	7839.05	7126.1	8065.48	7965.24	7367.74	7134.55	6428.12	7311.42	6476.63
PR_71077	PREDICTED: similar to Osgep-prov protein [Strongylocentrotus purpuratus]	NULL	GO:0003674_GO:0003824_GO:0004175_GO:0004222_GO:0005488_GO:0006508_GO:0008150_GO:0008152_GO:0008233_GO:0008237_GO:0008270_GO:0009987_GO:0016787_GO:0019538_GO:0034960_GO:0043167_GO:0043169_GO:0043170_GO:0043283_GO:0044237_GO:0044238_GO:0044260_GO:0044267_GO:0046872_GO:0046914_GO:0070011	NULL	NULL	NULL	NULL	0.100221	7079.11	NULL	8364.3	7310.64	6864.29	7494.07	7309.39	7091.79	6250.93	6380.16	6917.77	6740.43	8525.35	6713.13	6066.16
PR_78196	protein arg-6, mitochondrial precursor [Aspergillus terreus NIH2624]	NULL	GO:0003674_GO:0003824_GO:0003942_GO:0003991_GO:0005488_GO:0005575_GO:0005622_GO:0005623_GO:0005737_GO:0006082_GO:0006519_GO:0006520_GO:0006525_GO:0006526_GO:0006807_GO:0008150_GO:0008152_GO:0008652_GO:0009058_GO:0009064_GO:0009084_GO:0009308_GO:0009309_GO:0009987_GO:0016301_GO:0016491_GO:0016620_GO:0016740_GO:0016772_GO:0016774_GO:0016903_GO:0019752_GO:0034641_GO:0044237_GO:0044238_GO:0044249_GO:…	NULL	NULL	NULL	NULL	0.0724818	7047.93	NULL	6504.88	7182.65	7489.58	6790.8	7256.31	6476.56	7605.92	6897.57	7536.99	7096.63	6358.24	6394.22	8032.78
PR_81070	PREDICTED: similar to MGC68780 protein [Strongylocentrotus purpuratus]	NULL	NULL	NULL	NULL	NULL	NULL	0.0955039	7024.63	NULL	6673.11	7954.03	6959.2	6319.1	5594.22	6921.89	6911.54	7061.27	7101.88	7258.38	6726.18	7400.58	8438.78
PR_87480		TPSI	NULL	TPSI_1299	gypsy	NULL	NULL	0.0890591	7022.16	NULL	7701.89	7042.84	6514.52	7017.72	7885.1	6311.68	6650.61	6683.55	6255.26	7018.31	7269.66	8420.9	6515.98
PR_83028	ribose-phosphate pyrophosphokinase family protein [Tetrahymena thermophila SB210]	NULL	GO:0000287_GO:0003674_GO:0003824_GO:0004749_GO:0005488_GO:0006139_GO:0006753_GO:0008150_GO:0008152_GO:0009116_GO:0009117_GO:0009165_GO:0009987_GO:0016740_GO:0016772_GO:0016778_GO:0043167_GO:0044237_GO:0044238_GO:0046872_GO:0055086	NULL	NULL	NULL	NULL	0.0981589	6956.88	NULL	6574.25	8109.23	7225.89	6160.18	6267.67	7790.53	6431.36	7205.76	7261.32	7493.67	7521.01	5686.57	6712
PR_93903		NULL	GO:0003674_GO:0003824_GO:0005575_GO:0005623_GO:0016020_GO:0044464	NULL	NULL	NULL	NULL	0.0679395	6919.6	NULL	6874.95	6449.41	6053.69	7828.26	6870.15	6848.82	6513.76	6838.72	7562.04	7327.95	6544.91	7338.77	6903.38
PR_84907	PREDICTED: similar to MMSET type II [Monodelphis domestica]	NULL	GO:0003674_GO:0005488_GO:0008270_GO:0043167_GO:0043169_GO:0046872_GO:0046914	NULL	NULL	NULL	NULL	0.0539235	6914.07	NULL	6479.49	7346.25	7296.89	6573.46	6496.98	7388.82	7080.4	6716.41	6351.68	7114.57	7407.82	7018.65	6611.52
PR_83328	predicted protein [Physcomitrella patens subsp. patens]	NULL	NULL	NULL	NULL	NULL	NULL	0.0928861	6910.58	NULL	7117.05	8109.02	6546.43	7067.32	6397.07	6604.44	7269.95	7966.03	7005.86	6977.79	6260.05	6903.2	5613.29
PR_77307	serine/threonine protein phosphatase PPT1 [Aspergillus fumigatus Af293]	NULL	GO:0003674_GO:0003824_GO:0005488_GO:0005509_GO:0016787_GO:0043167_GO:0043169_GO:0046872	NULL	NULL	NULL	NULL	0.0925994	6908.16	NULL	7887.18	7096.14	7839.44	7907.75	6323.1	6826.75	7024.64	6596.68	6363.53	6684.96	6677.64	5643.41	6934.88
PR_79660		NULL	GO:0003674_GO:0005488_GO:0005515	NULL	NULL	NULL	NULL	0.0846786	6854.46	NULL	7459.05	7405.15	6323.12	6645.97	6426.12	6151.02	6986.49	6814.09	7298.86	5601.13	7281.8	7018.17	7697.04
PR_79270	Mitochondrial oxoglutarate/malate carrier proteins (ISS) [Ostreococcus tauri]	NULL	GO:0003674_GO:0003824_GO:0003951_GO:0008150_GO:0008152_GO:0016301_GO:0016740_GO:0016772_GO:0016773	NULL	NULL	NULL	NULL	0.0932367	6836.16	NULL	6019.81	6821.6	6273.13	6447.19	8226.63	6956.41	7512.91	7659.84	6378.78	6963.48	6291.57	6170.71	7148.03
PR_77498		NULL	NULL	NULL	NULL	NULL	NULL	0.0990836	6829.11	NULL	7213.2	6806.49	7616.57	7869.6	6555.46	6815.56	7353.72	6310.83	6498.45	6348.63	7752.92	5467.59	6169.43
PR_77579		NULL	GO:0003674_GO:0005488_GO:0005515	NULL	NULL	NULL	NULL	0.0929382	6828.4	NULL	7747.33	6587.4	6151.57	6237.06	7583.74	7672.75	6639.58	6746.32	6009.64	7039.29	7514.6	7003.14	5836.82
PR_72601		NULL	NULL	NULL	NULL	NULL	NULL	0.0877013	6822.74	NULL	7294.61	6310.9	6460.16	7596.18	6270.08	6568.69	7189.2	7162.4	7188.09	5857.69	8003.06	6380.9	6413.65
PR_94960		NULL	NULL	NULL	NULL	NULL	NULL	0.0819355	6760.71	NULL	6048.6	6967.89	6718.16	6561.6	7355.05	7640.67	6421.11	7157.3	6967.4	7228.82	5476.45	6861.35	6484.82
PR_49296	PREDICTED: similar to COP9 complex subunit 2 [Monodelphis domestica]	NULL	NULL	NULL	NULL	NULL	NULL	0.0932271	6734.33	NULL	7677.32	6660.12	6622.93	6282.99	6294.55	6377.28	6596.23	6760.04	7585.79	6299.7	8142.32	6000.76	6246.31
PR_41083	predicted protein [Physcomitrella patens subsp. patens]	NULL	GO:0000166_GO:0003674_GO:0003824_GO:0003924_GO:0005488_GO:0005525_GO:0016462_GO:0016787_GO:0016817_GO:0016818_GO:0017076_GO:0017111_GO:0019001_GO:0032553_GO:0032555_GO:0032561	NULL	NULL	NULL	NULL	0.0890572	6730.9	NULL	6325.71	6928.39	6096.58	6914.65	7165.19	6969.57	5527.6	7092.46	6901.46	7327.07	6070.93	6339.98	7842.1
PR_96280		NULL	GO:0003674_GO:0003779_GO:0003824_GO:0005488_GO:0005515_GO:0008092	NULL	NULL	NULL	NULL	0.0682685	6715.56	NULL	6339.2	6616.43	7534.69	6563.12	6839.24	7189.76	6909.02	6929.4	6358.3	6023.97	6545.58	6045.51	7408.12
PR_79541		NULL	NULL	NULL	NULL	NULL	NULL	0.0953308	6662.16	NULL	6678.39	5530.51	6239.97	6333.72	7660.47	6393.03	6877.46	6216.95	5829.31	7101.01	7792.55	6963.5	6991.19
PR_86419	putative short-chain dehydrogenase [Rhizobium leguminosarum bv. viciae 3841]	NULL	GO:0003674_GO:0003824_GO:0005575_GO:0005622_GO:0005623_GO:0005737_GO:0005777_GO:0008150_GO:0008152_GO:0016020_GO:0016491_GO:0042579_GO:0043226_GO:0043227_GO:0043229_GO:0043231_GO:0044424_GO:0044444_GO:0044464	NULL	NULL	NULL	NULL	0.0946624	6649.36	NULL	6873.94	7480.63	5789.78	6213.89	6124.77	7364.64	6474.36	6516.48	6480.01	7425.58	7404.79	6831.17	5461.67
PR_71108	predicted protein [Monosiga brevicollis MX1]	NULL	GO:0003674_GO:0003824_GO:0004177_GO:0005488_GO:0005575_GO:0005622_GO:0005623_GO:0005737_GO:0005773_GO:0006508_GO:0008150_GO:0008152_GO:0008233_GO:0008238_GO:0008270_GO:0009987_GO:0016787_GO:0019538_GO:0034960_GO:0043167_GO:0043169_GO:0043170_GO:0043226_GO:0043227_GO:0043229_GO:0043231_GO:0043283_GO:0044237_GO:0044238_GO:0044260_GO:0044267_GO:0044424_GO:0044444_GO:0044464_GO:0046872_GO:0046914_GO:…	NULL	NULL	NULL	NULL	0.100625	6647.06	NULL	6979.73	6562.53	5788.26	5878.44	5260.18	7200.62	6571.24	6485.45	7118.42	7762.08	7143.65	7235.88	6425.24
PR_84737		NULL	NULL	NULL	NULL	NULL	NULL	0.0990255	6615.01	NULL	6907.64	6247.56	5579.06	6367.82	6560.8	6636.39	5782.85	6352.74	6531.77	6689.11	8113.7	7706.33	6519.37
PR_85096		NULL	NULL	NULL	NULL	NULL	NULL	0.101153	6563.65	NULL	5717.08	5865.49	5541.37	5696.94	7297.35	7271.03	7335.17	6533.07	7217.75	6682.61	6787.97	6156.69	7224.97
PR_72001	predicted protein [Physcomitrella patens subsp. patens]	NULL	GO:0003674_GO:0003824_GO:0004379_GO:0006464_GO:0006497_GO:0006498_GO:0006499_GO:0008150_GO:0008152_GO:0008415_GO:0009058_GO:0009059_GO:0009987_GO:0016410_GO:0016740_GO:0016746_GO:0016747_GO:0018193_GO:0018319_GO:0018377_GO:0018409_GO:0019107_GO:0019538_GO:0031365_GO:0034645_GO:0034960_GO:0042157_GO:0042158_GO:0043170_GO:0043283_GO:0043412_GO:0043543_GO:0044237_GO:0044238_GO:0044249_GO:0044260_GO:…	NULL	NULL	NULL	NULL	0.0938107	6517.62	NULL	5990.33	5931.79	5764.71	6698.85	5442.22	6981.31	7254.2	7380.46	6552.61	6105.82	7021.94	6359.11	7245.71
PR_71123	predicted protein [Physcomitrella patens subsp. patens]	NULL	GO:0000166_GO:0003674_GO:0005488_GO:0005524_GO:0017076_GO:0030554_GO:0032553_GO:0032555_GO:0032559	NULL	NULL	NULL	NULL	0.0996393	6483.97	NULL	5774.83	5690.82	6468.99	5775.18	6923.49	6248.56	7163.35	7032.19	5991.19	6933.64	6607.35	5824.72	7857.27
PR_72611		NULL	GO:0005575_GO:0005622_GO:0005623_GO:0005634_GO:0005635_GO:0005643_GO:0006810_GO:0008150_GO:0012505_GO:0016020_GO:0016021_GO:0031224_GO:0031967_GO:0031975_GO:0032991_GO:0043226_GO:0043227_GO:0043229_GO:0043231_GO:0043234_GO:0044422_GO:0044424_GO:0044425_GO:0044428_GO:0044446_GO:0044464_GO:0046930_GO:0051179_GO:0051234	NULL	NULL	NULL	NULL	0.0936528	6453.79	NULL	5863.79	7251.21	7509.33	6476.43	5797.73	5962.38	6080.69	6741.96	6209.93	6490.71	7200.18	5463.65	6851.29
PR_71758	predicted protein [Physcomitrella patens subsp. patens]	NULL	GO:0003674_GO:0003824_GO:0016787	NULL	NULL	NULL	NULL	0.0941701	6394.37	NULL	7071.15	6763.25	6836.82	6983.91	5959.26	5673.74	5726.07	5631.8	6734.66	6886.15	5720.91	5874.21	7264.88
PR_76923		NULL	GO:0003674_GO:0005488_GO:0005515_GO:0005543_GO:0007154_GO:0008150_GO:0008289_GO:0009987_GO:0035091	NULL	NULL	NULL	NULL	0.090061	6214.96	NULL	5378.69	6539.09	6716.71	6619.58	5276.39	6489.68	6704.48	6943.52	5528.36	6662.74	5881.93	6395.67	5657.63
PR_73977		NULL	GO:0003674_GO:0005488_GO:0005515	NULL	NULL	NULL	NULL	0.101015	6206.08	NULL	6345.82	5635.56	5849.56	7009.63	5423.74	6094.96	6229.55	6106.88	6749.04	7731.76	5592.03	6295.24	5615.27
PR_94977		NULL	NULL	NULL	NULL	NULL	NULL	0.096282	6188.67	NULL	6695.33	5918.66	5514.36	6350.99	6559.71	6667.7	6821.08	6143.56	7216.96	6191.62	5528.57	4993.45	5850.79
PR_83862		NULL	GO:0003674_GO:0003676_GO:0003723_GO:0003824_GO:0004518_GO:0004519_GO:0004521_GO:0004540_GO:0005488_GO:0016787_GO:0016788_GO:0016892_GO:0016894_GO:0033897	NULL	NULL	NULL	NULL	0.0952189	6182.25	NULL	5547.5	5263.14	5818.05	5893.33	6329.19	6480.71	6789.56	5249.36	6089.73	6302.24	7161.23	6471.64	6973.57
PR_83259	Diacylglycerol acyltransferase family protein [Tetrahymena thermophila SB210]	NULL	GO:0003674_GO:0003824_GO:0016740_GO:0016746_GO:0016747	NULL	NULL	NULL	NULL	0.101418	6161.54	NULL	6647.73	7093.25	6410.77	6542.42	5251.26	5958.26	5598.1	6306.3	6457.53	5429.09	7241.01	5800.75	5363.5
PR_40566	PREDICTED: similar to ccr4-associated factor [Nasonia vitripennis]	NULL	GO:0005575_GO:0005622_GO:0005623_GO:0005634_GO:0043226_GO:0043227_GO:0043229_GO:0043231_GO:0044424_GO:0044464	NULL	NULL	NULL	NULL	0.0915144	6150.43	NULL	6608.42	5617.17	5371.86	6033.02	5723.14	5833.82	6298.19	6941.93	6019.76	5864.66	7456.43	6455.81	5731.36
PR_72214	predicted protein [Nematostella vectensis]	NULL	GO:0003674_GO:0005488_GO:0005509_GO:0005515_GO:0005575_GO:0005622_GO:0005623_GO:0005737_GO:0005783_GO:0006457_GO:0008150_GO:0008152_GO:0009987_GO:0019538_GO:0034960_GO:0043167_GO:0043169_GO:0043170_GO:0043226_GO:0043227_GO:0043229_GO:0043231_GO:0043283_GO:0044237_GO:0044238_GO:0044260_GO:0044267_GO:0044424_GO:0044444_GO:0044464_GO:0046872_GO:0051082	NULL	NULL	NULL	NULL	0.100288	6073.95	NULL	5147.45	5894.69	5458.18	5945.74	6692.31	6019.59	7438.19	6190.58	5755.51	6213.31	5319.67	6046.04	6840.05
PR_84445		NULL	NULL	NULL	NULL	NULL	NULL	0.0676822	6060.18	NULL	6189.5	6829.25	6148.55	5845.41	6084.85	5839.42	5949.34	6771.29	6201.7	5709.37	5204.4	5809.67	6199.57
PR_81356	protein serine/threonine kinase [Dictyostelium discoideum AX4]	NULL	GO:0000166_GO:0003674_GO:0003824_GO:0004672_GO:0004674_GO:0004713_GO:0005488_GO:0005524_GO:0006464_GO:0006468_GO:0006793_GO:0006796_GO:0008150_GO:0008152_GO:0009987_GO:0016301_GO:0016310_GO:0016740_GO:0016772_GO:0016773_GO:0017076_GO:0019538_GO:0030554_GO:0032553_GO:0032555_GO:0032559_GO:0034960_GO:0043170_GO:0043283_GO:0043412_GO:0043687_GO:0044237_GO:0044238_GO:0044260_GO:0044267	NULL	NULL	NULL	NULL	0.0880761	6022.89	NULL	5482.07	5708.36	7272.67	6275.39	6592.5	5918.07	5777.49	5415.71	6181.84	6289.73	5528.38	6436.45	5418.96
PR_80048	VIP2 [Nicotiana benthamiana]	NULL	GO:0003674_GO:0005575_GO:0005622_GO:0005623_GO:0005634_GO:0008150_GO:0009889_GO:0010468_GO:0010556_GO:0019219_GO:0019222_GO:0030528_GO:0031323_GO:0031326_GO:0043226_GO:0043227_GO:0043229_GO:0043231_GO:0044424_GO:0044464_GO:0045449_GO:0050789_GO:0050794_GO:0060255_GO:0065007_GO:0080090	NULL	NULL	NULL	NULL	0.0819891	5997.55	NULL	6455.41	5443.79	6263.79	6736.66	5768.88	5906.55	6762.92	6437.68	5826.56	5785.71	5830.73	5756.86	4992.55
PR_75525		NULL	GO:0003674_GO:0005488_GO:0005575_GO:0005622_GO:0005623_GO:0008270_GO:0043167_GO:0043169_GO:0044464_GO:0046872_GO:0046914	NULL	NULL	NULL	NULL	0.0723856	5993.77	NULL	5984.16	6143.66	6392.6	5798.37	5451.36	6309.3	6569.04	5658.31	6231.94	5196.94	6680.26	5985.77	5517.3
PR_78333		NULL	NULL	NULL	NULL	NULL	NULL	0.101519	5986.1	NULL	6132.12	6420.63	5078.72	5465.84	6617.6	7115.67	5683.26	6542.83	6048.14	6384.43	5081.51	5326.15	5922.39
PR_79901	predicted protein [Nematostella vectensis]	NULL	GO:0006810_GO:0006887_GO:0006904_GO:0008150_GO:0009987_GO:0016192_GO:0022406_GO:0032940_GO:0046903_GO:0048278_GO:0051179_GO:0051234_GO:0051641_GO:0051649	NULL	NULL	NULL	NULL	0.0990508	5961.46	NULL	5809.08	6584.77	6806.42	5671.12	6563.69	6700.03	5595.55	6515.08	5781.02	5919.15	4892	5336.49	5324.61
PR_79574		NULL	NULL	NULL	NULL	NULL	NULL	0.093708	5906.17	NULL	5231.44	4957.22	5761.87	6404.4	6374.48	6269.62	6439.46	6115.21	6445.73	6175.13	4808.06	6131.55	5666.08
PR_78049	SWIRM domain containing protein [Tetrahymena thermophila SB210]	NULL	GO:0003674_GO:0003676_GO:0003677_GO:0005488_GO:0005509_GO:0043167_GO:0043169_GO:0046872	NULL	NULL	NULL	NULL	0.10057	5903.84	NULL	4702.46	6069.71	6977.97	5359.93	5522.59	6196.48	6308.3	6926.84	5714.42	5949.24	5665.61	5789.8	5566.56
PR_82225		NULL	GO:0003674_GO:0005488	NULL	NULL	NULL	NULL	0.091967	5898.71	NULL	5613.8	6188.78	6898.74	5284.37	6049.66	6186.14	5242.34	6399.61	6180.71	5724.57	5554.06	4914.8	6445.68
PR_71849	D-3-phosphoglycerate dehydrogenase [Mannheimia succiniciproducens MBEL55E]	NULL	GO:0003674_GO:0003824_GO:0005488_GO:0008150_GO:0008152_GO:0016491_GO:0016597_GO:0016614_GO:0016616_GO:0043176_GO:0048037_GO:0050662_GO:0051287	NULL	NULL	NULL	NULL	0.100229	5842.65	NULL	5222.23	5245.83	6197.39	5664.19	6544.68	5889.18	6538.2	6144.76	5687.69	6892.8	5614.19	4727.13	5586.2
PR_72657	predicted protein [Physcomitrella patens subsp. patens]	NULL	NULL	NULL	NULL	NULL	NULL	0.0881063	5841.75	NULL	5643.78	6915.37	6056.33	6205.73	5659.21	6149.12	5953.14	5522.26	5837.11	6398.63	5633.61	4925.32	5043.09
PR_78667	protein mitochondrial targeting protein (Mas1) [Aspergillus fumigatus Af293]	NULL	GO:0003674_GO:0005488_GO:0005515_GO:0006457_GO:0008150_GO:0008152_GO:0009987_GO:0019538_GO:0031072_GO:0034960_GO:0043170_GO:0043283_GO:0044237_GO:0044238_GO:0044260_GO:0044267_GO:0051082	NULL	NULL	NULL	NULL	0.098099	5841	NULL	5656.26	5430.76	5903.46	5844.7	6062	5845.08	4878.97	6325.19	6498.42	6096.09	5593.57	4829.72	6968.8
PR_95962		NULL	NULL	NULL	NULL	NULL	NULL	0.10022	5810.92	NULL	5750.99	6321.77	6518.78	6614.31	5806.03	5550.4	6611.16	5402.29	5737.19	5324.23	5556.21	5883.16	4465.44
PR_75528	predicted protein [Physcomitrella patens subsp. patens]	NULL	GO:0003674_GO:0003676_GO:0005488_GO:0005515_GO:0008270_GO:0043167_GO:0043169_GO:0046872_GO:0046914	NULL	NULL	NULL	NULL	0.0913046	5772.15	NULL	6305.32	6309.67	5499.22	5657.33	5469.17	4789.05	4858.84	5778.47	6407.45	6146.14	6348.07	6034.22	5435.02
PR_73660	predicted protein [Physcomitrella patens subsp. patens]	NULL	GO:0003674_GO:0005488_GO:0008270_GO:0043167_GO:0043169_GO:0046872_GO:0046914	NULL	NULL	NULL	NULL	0.0900648	5771.64	NULL	6089.15	6650.38	5538.55	6465.39	5621.43	5879.23	6143.14	5325.16	5864.03	5167.83	4779.89	6186.77	5320.36
PR_83831	ATSTE24 [Arabidopsis thaliana]	NULL	GO:0003674_GO:0003824_GO:0004175_GO:0004222_GO:0005575_GO:0005623_GO:0006508_GO:0008150_GO:0008152_GO:0008233_GO:0008237_GO:0009987_GO:0016020_GO:0016787_GO:0019538_GO:0034960_GO:0043170_GO:0043283_GO:0044237_GO:0044238_GO:0044260_GO:0044267_GO:0044464_GO:0070011	NULL	NULL	NULL	NULL	0.0990766	5682	NULL	5432.07	5898.81	6055.49	6262.49	5210.45	6052.4	5558.47	5441	5488.74	5698.57	5466.77	4422.54	6878.2
PR_77793		NULL	NULL	NULL	NULL	NULL	NULL	0.0859719	5673.99	NULL	5754.39	5867.73	5667.67	5757.8	5329.22	6176.49	4887.88	5544.07	5509.63	5193.09	6644.16	6360.35	5069.42
PR_77635		NULL	NULL	NULL	NULL	NULL	NULL	0.0970596	5655.29	NULL	5626.85	5955.91	4728.75	5236.67	6024.98	5510.6	5592.71	5276.99	5728.78	6212.83	5877.77	6879.62	4866.29
PR_73905	RNA polymerase II associated protein 3 [Gallus gallus]	NULL	NULL	NULL	NULL	NULL	NULL	0.0871402	5563.18	NULL	6477.25	6062.31	4905.84	5945.15	5353.35	5543.19	4849.97	4840.71	5434.71	5727.16	6082.94	5507.61	5591.17
PR_87888		NULL	GO:0003674_GO:0003676_GO:0003677_GO:0005488	NULL	NULL	NULL	NULL	0.0752939	5541.31	NULL	4695.32	5465.29	5953.01	5711.72	5525.46	5988.71	5317.27	5192.27	5652.85	6331.9	5828.47	5194.96	5179.83
PR_76062	putative glutamine amidotransferase [Azorhizobium caulinodans ORS 571]	NULL	NULL	NULL	NULL	NULL	NULL	0.100306	5491.91	NULL	6542.43	5452.34	4925.2	5614.04	5522.93	4935.5	4904.98	6284.18	5594.36	5743.95	6089.85	5080.95	4704.13
PR_80700		NULL	NULL	NULL	NULL	NULL	NULL	0.0960407	5489.42	NULL	6574.22	5705.21	4677.81	5472.09	5827.78	5424.71	4741.98	5621.91	5188.94	6341.76	5464.07	5198.78	5123.13
PR_78241		TPSI	GO:0003674_GO:0003676_GO:0005488_GO:0005575_GO:0005622_GO:0005623_GO:0005634_GO:0043226_GO:0043227_GO:0043229_GO:0043231_GO:0044424_GO:0044464	TPSI_3489	DDE_1	NULL	NULL	0.08172	5466.45	NULL	5559.09	5154.73	5324.97	5522.83	6528.53	4765.35	5828.42	5324.16	5178.45	5797.41	4819.01	5750.93	5509.99
PR_79694		NULL	GO:0003674_GO:0005488_GO:0008270_GO:0043167_GO:0043169_GO:0046872_GO:0046914	NULL	NULL	NULL	NULL	0.0729884	5456.89	NULL	5708.69	5608.22	5317.59	5603.92	5997.31	5585.42	5501.15	5846.9	5503.19	5722.4	5198.99	4900.83	4444.99
PR_95460	Os03g0223700 [Oryza sativa (japonica cultivar-group)]	NULL	NULL	NULL	NULL	NULL	NULL	0.0911399	5422.69	NULL	5763.71	5590.24	5453.56	5235.5	5098.49	4892.57	4444.76	6076.14	5983.01	5826.31	5128.82	4930.8	6071.01
PR_78961		NULL	GO:0003674_GO:0003824_GO:0004175_GO:0004190_GO:0006508_GO:0008150_GO:0008152_GO:0008233_GO:0009987_GO:0016787_GO:0019538_GO:0034960_GO:0043170_GO:0043283_GO:0044237_GO:0044238_GO:0044260_GO:0044267_GO:0070001_GO:0070011	NULL	NULL	NULL	NULL	0.0833273	5381.83	NULL	4622.2	4684.68	5364.23	5385.01	5472.19	5094.97	5065.7	5623.66	5468.73	6243.27	5619.55	6073.02	5246.54
PR_76890	Os03g0278400 [Oryza sativa (japonica cultivar-group)]	NULL	GO:0003674_GO:0005083_GO:0005096_GO:0005488_GO:0008047_GO:0008060_GO:0008150_GO:0008270_GO:0009966_GO:0010646_GO:0030234_GO:0030695_GO:0032012_GO:0032312_GO:0032318_GO:0043087_GO:0043167_GO:0043169_GO:0046578_GO:0046872_GO:0046914_GO:0050789_GO:0050790_GO:0050794_GO:0051056_GO:0051336_GO:0060589_GO:0065007_GO:0065009	NULL	NULL	NULL	NULL	0.0928165	5376.13	NULL	5513.44	5104.57	5486.62	5289.4	4832.78	4444.93	4680.14	5474.86	5492.04	6394.41	5560.56	5734.78	5881.22
PR_79971	Short chain dehydrogenase family protein [Oceanospirillum sp. MED92]	NULL	GO:0003674_GO:0003824_GO:0008150_GO:0008152_GO:0016491	NULL	NULL	NULL	NULL	0.101247	5354.79	NULL	5944.33	5356.99	5001.99	5484.16	5379.89	5610.65	5018.59	5994.42	5303.78	4640.24	6365.91	5250.95	4260.35
PR_71676	asparagine-linked glycosylation 9 protein isoform a [Homo sapiens]	NULL	GO:0003674_GO:0003824_GO:0005575_GO:0005622_GO:0005623_GO:0005737_GO:0005783_GO:0005789_GO:0006464_GO:0006497_GO:0006505_GO:0006506_GO:0006629_GO:0006643_GO:0006644_GO:0006650_GO:0008150_GO:0008152_GO:0008610_GO:0008654_GO:0009058_GO:0009059_GO:0009987_GO:0012505_GO:0016020_GO:0016740_GO:0016757_GO:0019538_GO:0030384_GO:0031090_GO:0031224_GO:0031227_GO:0031300_GO:0034645_GO:0034960_GO:0042157_GO:…	NULL	NULL	NULL	NULL	0.0793149	5352.04	NULL	5709.86	4686.05	4824.69	5492.31	5921.91	5635.79	5350.9	5478.3	5147.83	5592.24	5512.86	4474.96	5748.86
PR_81861	cAMP-dependent protein kinase	NULL	GO:0000166_GO:0003674_GO:0003824_GO:0004672_GO:0004674_GO:0004713_GO:0005488_GO:0005515_GO:0005524_GO:0005543_GO:0006464_GO:0006468_GO:0006793_GO:0006796_GO:0007154_GO:0008150_GO:0008152_GO:0008289_GO:0009987_GO:0016301_GO:0016310_GO:0016740_GO:0016772_GO:0016773_GO:0017076_GO:0019538_GO:0030554_GO:0032553_GO:0032555_GO:0032559_GO:0034960_GO:0035091_GO:0043170_GO:0043283_GO:0043412_GO:0043687_GO:…	NULL	NULL	NULL	NULL	0.0912037	5309.75	NULL	4943.65	5617.41	5906.98	6080.67	5240.95	5544.56	4281.37	5077.98	5357.97	5044.74	5016.17	4959.28	5954.96
PR_78650		NULL	GO:0003674_GO:0005083_GO:0005096_GO:0005097_GO:0005099_GO:0005575_GO:0005622_GO:0005623_GO:0008047_GO:0008150_GO:0009966_GO:0010646_GO:0030234_GO:0030695_GO:0032313_GO:0032318_GO:0032483_GO:0043087_GO:0044464_GO:0046578_GO:0050789_GO:0050790_GO:0050794_GO:0051056_GO:0051336_GO:0060589_GO:0065007_GO:0065009	NULL	NULL	NULL	NULL	0.0948011	5264.54	NULL	5280.22	5175.76	5329.71	4927.11	4589.74	6630.54	5428.21	4978.03	5009.26	5688.15	5625.11	4999.06	4778.15
PR_71901	amidophosphoribosyltransferase [Pseudomonas putida KT2440]	NULL	GO:0003674_GO:0003824_GO:0004044_GO:0006139_GO:0006144_GO:0006725_GO:0008150_GO:0008152_GO:0009058_GO:0009112_GO:0009113_GO:0009116_GO:0009987_GO:0016740_GO:0016757_GO:0016763_GO:0034404_GO:0034654_GO:0042440_GO:0044237_GO:0044238_GO:0044249_GO:0046112_GO:0046148_GO:0046483_GO:0055086	NULL	NULL	NULL	NULL	0.0976511	5262.19	NULL	5167.3	5921.88	5878.41	5926.07	5622.24	4844.88	4851.22	4921.67	4889.19	5343.72	5083.68	4191.24	5766.97
PR_80453	heat shock 70kDa protein 4-like [Gallus gallus]	NULL	GO:0000166_GO:0003674_GO:0005488_GO:0005524_GO:0017076_GO:0030554_GO:0032553_GO:0032555_GO:0032559	NULL	NULL	NULL	NULL	0.0909216	5252.81	NULL	5024.93	4731.43	4969.82	5482.31	4946.42	5119.09	5131.49	5887.15	4914.98	4763.62	6357.35	5088.99	5868.9
PR_93295		NULL	GO:0003674_GO:0005488_GO:0005515_GO:0005575_GO:0005622_GO:0005623_GO:0005737_GO:0006810_GO:0006886_GO:0008104_GO:0008150_GO:0009987_GO:0015031_GO:0016020_GO:0016192_GO:0030117_GO:0032991_GO:0033036_GO:0034613_GO:0043234_GO:0044424_GO:0044425_GO:0044444_GO:0044464_GO:0045184_GO:0046907_GO:0048475_GO:0051179_GO:0051234_GO:0051641_GO:0051649	NULL	NULL	NULL	NULL	0.0995258	5247.64	NULL	5466.33	6102.83	5641.26	5290.86	5864.13	5694.1	4663.35	4870.83	4963.49	4434.09	5086.09	5669.37	4472.56
PR_51168	Diatom spindle kinesin 1	NULL	GO:0000166_GO:0003674_GO:0003774_GO:0003777_GO:0003824_GO:0005488_GO:0005524_GO:0005575_GO:0005622_GO:0005623_GO:0005856_GO:0005875_GO:0006810_GO:0007017_GO:0007018_GO:0008150_GO:0009987_GO:0015630_GO:0016462_GO:0016787_GO:0016817_GO:0016818_GO:0017076_GO:0017111_GO:0030554_GO:0030705_GO:0032553_GO:0032555_GO:0032559_GO:0032991_GO:0043226_GO:0043228_GO:0043229_GO:0043232_GO:0043234_GO:0044422_GO:…	NULL	NULL	NULL	NULL	0.0974195	5177.04	NULL	5642.05	4591.33	5441.85	5723.68	5544.07	5853.61	5268.01	4735.22	4945.16	5520.7	4226.58	4481.03	5328.27
PR_95477	mitogen-activated protein kinase 2, putative [Cryptosporidium parvum Iowa II]	NULL	GO:0000166_GO:0003674_GO:0003824_GO:0004672_GO:0004674_GO:0004713_GO:0004871_GO:0005488_GO:0005524_GO:0005575_GO:0005623_GO:0006464_GO:0006468_GO:0006793_GO:0006796_GO:0007154_GO:0007165_GO:0008150_GO:0008152_GO:0009055_GO:0009987_GO:0016020_GO:0016301_GO:0016310_GO:0016491_GO:0016740_GO:0016772_GO:0016773_GO:0017076_GO:0019538_GO:0030554_GO:0032553_GO:0032555_GO:0032559_GO:0034960_GO:0043170_GO:…	NULL	NULL	NULL	NULL	0.0956962	5169.86	NULL	4794.39	4711.7	6007.7	6127.81	4955.14	5555.53	5284.93	5137.33	4445.89	5167.03	4534.91	5422.18	5063.59
PR_74925	putative nuclear LIM interactor-interacting protein [Phytophthora sojae]	NULL	NULL	NULL	NULL	NULL	NULL	0.0972595	5118.89	NULL	5244.97	4911.86	4273.41	6011.55	4336.74	4671.18	5321.65	5233.89	5552.38	5582.73	5628.64	4798.81	4977.78
PR_74424	predicted protein [Nematostella vectensis]	NULL	GO:0003674_GO:0003824_GO:0006464_GO:0008150_GO:0008152_GO:0009987_GO:0016874_GO:0016879_GO:0016881_GO:0019222_GO:0019538_GO:0019787_GO:0034960_GO:0043170_GO:0043283_GO:0043412_GO:0043687_GO:0044237_GO:0044238_GO:0044260_GO:0044267_GO:0050789_GO:0051246_GO:0060255_GO:0065007_GO:0080090	NULL	NULL	NULL	NULL	0.0738853	5106.97	NULL	5137.02	5542	4661.87	4819.41	4973.45	5286.33	5385.08	4804.43	4964.85	4711.03	6074.98	4892.24	5137.89
PR_86442	similar to Mus musculus (Mouse). similar to CCR4-NOT transcription complex, subunit 3 [Dictyostelium discoideum]	NULL	GO:0003674_GO:0003824_GO:0005488_GO:0005496_GO:0005575_GO:0005622_GO:0005623_GO:0005634_GO:0008150_GO:0008152_GO:0008289_GO:0009889_GO:0010468_GO:0010556_GO:0019219_GO:0019222_GO:0019842_GO:0030170_GO:0030528_GO:0031323_GO:0031326_GO:0043226_GO:0043227_GO:0043229_GO:0043231_GO:0044424_GO:0044464_GO:0045449_GO:0048037_GO:0050789_GO:0050794_GO:0060255_GO:0065007_GO:0070279_GO:0080090	NULL	NULL	NULL	NULL	0.0939652	5094.25	NULL	5763.23	4964.84	4758.11	5249.67	4969.16	4642.83	5045.55	4449.89	6197.16	4730.48	5648.3	4827.15	4978.9
PR_84935		NULL	NULL	NULL	NULL	NULL	NULL	0.0862233	5082.96	NULL	5216.05	5500.22	5774.19	5326.2	5126.15	5197.5	4816.11	4462.81	4157.41	4862.78	4779.1	5257.87	5602.03
PR_73226	PREDICTED: similar to ZDHHC3 protein isoform 2 [Pan troglodytes]	NULL	GO:0003674_GO:0005488_GO:0008270_GO:0043167_GO:0043169_GO:0046872_GO:0046914	NULL	NULL	NULL	NULL	0.090473	5073.49	NULL	4949.73	5362.62	4883.57	4569.9	5656.61	5041.56	5034.12	4871.12	6174.92	5257.6	4550.61	4415.17	5187.79
PR_71692	predicted protein [Laccaria bicolor S238N-H82]	NULL	GO:0000287_GO:0003674_GO:0003824_GO:0005488_GO:0016740_GO:0019842_GO:0030976_GO:0043167_GO:0046872_GO:0048037_GO:0050662	NULL	NULL	NULL	NULL	0.0789895	5039.25	NULL	5561.69	5761.14	5262.1	5044.27	4838.46	4779.61	5142.57	4886.99	4269.34	5047.93	4447.86	5067.08	5401.27
PR_78185	alpha/beta hydrolase fold [Rhodopseudomonas palustris BisB5]	NULL	GO:0003674_GO:0003824	NULL	NULL	NULL	NULL	0.0960031	4969.34	NULL	5078.27	5231.82	5277.52	4146.75	4675.97	5804.11	5113.07	4557.89	4384.15	4896.83	4732.5	5819.24	4883.28
PR_85421	vacuolar protein sorting-associated protein 45 [Neurospora crassa OR74A]	NULL	GO:0006810_GO:0006887_GO:0006904_GO:0008150_GO:0009987_GO:0016192_GO:0022406_GO:0032940_GO:0046903_GO:0048278_GO:0051179_GO:0051234_GO:0051641_GO:0051649	NULL	NULL	NULL	NULL	0.0955678	4955.22	NULL	4405.23	4715.6	5528.54	4953.26	5311.59	4415.88	4104.03	5331.49	5247.18	5437.77	4517.32	4845.94	5604.05
PR_72953		NULL	NULL	NULL	NULL	NULL	NULL	0.0964346	4950.05	NULL	5485.24	5158.12	5582.33	5587.93	4417.23	5397.43	4630.49	5157.3	4236.18	4441.09	4297.3	4968.78	4991.17
PR_73326		NULL	GO:0003674_GO:0005488_GO:0005515	NULL	NULL	NULL	NULL	0.0860279	4936.7	NULL	5150.78	5254.56	5280.04	5551.35	4383.72	5417.79	5271.36	5260.65	4616.05	4547.56	4264.11	4604.72	4574.47
PR_76590		NULL	GO:0003674_GO:0003824_GO:0005488_GO:0016491_GO:0016614_GO:0016616_GO:0048037	NULL	NULL	NULL	NULL	0.0925071	4906.26	NULL	4317	4344.03	4856.86	5076.64	5511.09	4531.19	4963.7	5390.94	5068.67	5550.33	4607.49	5363.44	4199.93
PR_73505	PREDICTED: similar to Tetratricopeptide repeat domain 1 [Gallus gallus]	NULL	NULL	NULL	NULL	NULL	NULL	0.0911966	4902.45	NULL	4174.21	4924.41	4388.01	4401.27	5129.22	5199.87	4585.13	4620.16	4819.49	4871.38	5594.77	5485.59	5538.38
PR_74606		NULL	NULL	NULL	NULL	NULL	NULL	0.0874213	4858.69	NULL	4916.12	5199.01	4218.79	4648.86	5321.61	4309.52	4284.33	5335.9	4606.93	5607.92	5087.34	4718.09	4908.49
PR_43775	cryptochrome photoreceptor [Chlamydomonas reinhardtii]	NULL	GO:0003674_GO:0003824_GO:0003913_GO:0006139_GO:0006259_GO:0006281_GO:0006950_GO:0006974_GO:0008150_GO:0008152_GO:0009987_GO:0016829_GO:0016830_GO:0033554_GO:0034960_GO:0034984_GO:0043170_GO:0043283_GO:0044237_GO:0044238_GO:0044260_GO:0050896_GO:0051716	NULL	NULL	NULL	NULL	0.0999385	4854.22	NULL	4788.16	4863.32	5225.67	4955.5	5455.01	4540.12	5012.38	5010.97	5753.26	4795.29	3774.6	4708	4222.63
PR_84871		NULL	GO:0003674_GO:0005215_GO:0005575_GO:0005623_GO:0006810_GO:0008150_GO:0016020_GO:0016021_GO:0031224_GO:0044425_GO:0044464_GO:0051179_GO:0051234	NULL	NULL	NULL	NULL	0.100605	4844.82	NULL	5185.69	4500.64	5304.59	5383.33	4933.53	4174.4	3877.21	4625.34	5363.92	4766.7	4366.12	5054.93	5446.29
PR_71995		NULL	GO:0003674_GO:0003824	NULL	NULL	NULL	NULL	0.0994877	4803.07	NULL	4965.06	3942.1	4932.44	5308.99	4389.38	4108.84	4721.92	4620.53	5060.7	5157.59	4457.69	5734.55	5040.09
PR_72899	DNA-damage inducible protein 2 [Danio rerio]	NULL	GO:0003674_GO:0003824_GO:0004175_GO:0004190_GO:0005488_GO:0005515_GO:0006457_GO:0006464_GO:0006508_GO:0008150_GO:0008152_GO:0008233_GO:0009987_GO:0016787_GO:0019538_GO:0031072_GO:0034960_GO:0043170_GO:0043283_GO:0043412_GO:0044237_GO:0044238_GO:0044260_GO:0044267_GO:0051082_GO:0070001_GO:0070011	NULL	NULL	NULL	NULL	0.0942439	4764.85	NULL	5016.89	4078.87	4413.12	4776.52	4423.02	4073.11	4625.2	5251.32	5203.68	5518.91	5134.96	5036.76	4390.74
PR_79244		NULL	GO:0003674_GO:0003676_GO:0005488	NULL	NULL	NULL	NULL	0.088236	4750.04	NULL	5033.23	4872.09	5269.42	5567.79	4696.24	4346.47	5014.22	4350.87	4582.95	4115.14	5109.99	4247.69	4544.46
PR_75315	PREDICTED: similar to CG9854-PA, isoform A [Tribolium castaneum]	NULL	GO:0003674_GO:0003676_GO:0003723_GO:0003824_GO:0004652_GO:0005488_GO:0005575_GO:0005622_GO:0005623_GO:0005634_GO:0006139_GO:0006350_GO:0006396_GO:0008150_GO:0008152_GO:0009058_GO:0009059_GO:0009987_GO:0010467_GO:0016070_GO:0016740_GO:0016772_GO:0016779_GO:0031123_GO:0034645_GO:0034960_GO:0034961_GO:0043170_GO:0043226_GO:0043227_GO:0043229_GO:0043231_GO:0043283_GO:0043284_GO:0043631_GO:0044237_GO:…	NULL	NULL	NULL	NULL	0.0828164	4736.73	NULL	4432.44	5041.85	5399.6	4570.68	4920.07	4960.11	4817.94	4419.6	4716.82	4626.64	5374	3995.07	4302.62
PR_79728		NULL	GO:0005575_GO:0005622_GO:0005623_GO:0005737_GO:0044424_GO:0044464	NULL	NULL	NULL	NULL	0.0952075	4702.51	NULL	5243.22	5255.07	4233.94	3928.84	4472.84	4547.43	4804.26	4717.36	4437	4800.31	5674.24	4467.41	4550.69
PR_75634	PREDICTED: similar to KIAA0859 isoform 1 [Equus caballus]	NULL	NULL	NULL	NULL	NULL	NULL	0.0877711	4695.48	NULL	5123.53	5300.76	5214.53	4840.33	4665.64	4952.48	4559.37	4372.13	4065.4	4469.3	4001.8	5088.02	4387.93
PR_80388		NULL	GO:0005575_GO:0005622_GO:0005623_GO:0005737_GO:0005777_GO:0005778_GO:0005779_GO:0006996_GO:0007031_GO:0008150_GO:0009987_GO:0016020_GO:0016021_GO:0016043_GO:0031090_GO:0031224_GO:0031231_GO:0031300_GO:0031301_GO:0031903_GO:0042579_GO:0043226_GO:0043227_GO:0043229_GO:0043231_GO:0044422_GO:0044424_GO:0044425_GO:0044438_GO:0044439_GO:0044444_GO:0044446_GO:0044464	NULL	NULL	NULL	NULL	0.0802816	4691.51	NULL	4910.62	4701.61	4225.34	3942.62	4488.45	4556.49	4540.3	5147.33	4874.89	4497	4632.87	5063	5409.07
PR_75480		NULL	NULL	NULL	NULL	NULL	NULL	0.0939405	4688.85	NULL	5051.41	4617.59	3839.02	4141.4	4921.93	5245.16	4726.94	4820.52	4823.37	4549.06	5498.01	4551.34	4169.35
PR_78910		NULL	NULL	NULL	NULL	NULL	NULL	0.0752428	4687.18	NULL	4278.68	5125.28	4093.88	4766.28	5025.37	4420.65	4208.82	4531.98	5263.88	4727.36	4628.57	4979.91	4882.72
PR_74179	mCG4934 [Mus musculus]	NULL	NULL	NULL	NULL	NULL	NULL	0.0772226	4685.56	NULL	4713.87	4626.9	4958.88	4833.97	5098.68	4356.17	5227.21	4886.89	4153.69	4084.83	4790.96	4193.33	4986.85
PR_95892	carbohydrate kinase, FGGY [Roseiflexus sp. RS-1]	NULL	GO:0003674_GO:0003824_GO:0005975_GO:0008150_GO:0008152_GO:0016740_GO:0016772_GO:0016773_GO:0044238	NULL	NULL	NULL	NULL	0.0973683	4652.8	NULL	4891.34	4425.26	4401.46	4263.04	4642.99	4207.31	4514.13	5276.78	5045.16	5549.87	4242.1	3979.15	5047.86
PR_95843	putative Tyr/Ser/Thr phosphatase [Anopheles gambiae]	NULL	GO:0003674_GO:0003824_GO:0005575_GO:0006461_GO:0006793_GO:0006796_GO:0008150_GO:0008152_GO:0009987_GO:0010926_GO:0016043_GO:0016311_GO:0016787_GO:0016788_GO:0016791_GO:0022607_GO:0032991_GO:0034621_GO:0034622_GO:0042578_GO:0043234_GO:0043623_GO:0043933_GO:0044085_GO:0044237_GO:0051258_GO:0065003_GO:0070271	NULL	NULL	NULL	NULL	0.0779749	4646.98	NULL	4453.08	4501.25	4299.16	4117.21	4942.48	4956.47	4345.6	4836.35	4795.24	4767.68	4967.05	5342.44	4086.68
PR_84599		NULL	NULL	NULL	NULL	NULL	NULL	0.0833709	4625.92	NULL	5180.16	4645.45	4886.97	5239.99	4972.36	4061.25	5060.01	4415.55	4332.5	4153.08	4285.88	4343.76	4560.03
PR_96768	Signal peptide protease CG11840-PA [Drosophila melanogaster]	NULL	GO:0003674_GO:0003824_GO:0004175_GO:0004190_GO:0005575_GO:0005623_GO:0008233_GO:0016020_GO:0016021_GO:0016787_GO:0031224_GO:0044425_GO:0044464_GO:0070001_GO:0070011	NULL	NULL	NULL	NULL	0.0784155	4561.98	NULL	4037.62	4943.79	4587.64	4880.11	4828.42	4451.46	4669.38	4549.35	4858.08	3762.23	4179.82	4580.64	4977.27
PR_79503		NULL	NULL	NULL	NULL	NULL	NULL	0.0803812	4561.34	NULL	4460.91	4556.23	4948.62	4131.24	5068.57	4493.37	4448.15	4307.44	4371.37	4500.58	5451.78	4469.13	4090.01
PR_79171	PREDICTED: similar to CG4603-PA [Tribolium castaneum]	NULL	NULL	NULL	NULL	NULL	NULL	0.08046	4551.53	NULL	5283.23	4450.45	4556.71	4752.05	4686.24	4490.92	4288.49	4455.12	4280.65	4113.85	5234.76	4594.88	3982.57
PR_54926	predicted protein [Nematostella vectensis]	NULL	GO:0003674_GO:0003824_GO:0004175_GO:0004222_GO:0005488_GO:0006508_GO:0008150_GO:0008152_GO:0008233_GO:0008237_GO:0008270_GO:0009987_GO:0016787_GO:0019538_GO:0034960_GO:0043167_GO:0043169_GO:0043170_GO:0043283_GO:0044237_GO:0044238_GO:0044260_GO:0044267_GO:0046872_GO:0046914_GO:0070011	NULL	NULL	NULL	NULL	0.0887211	4512.14	NULL	4045.78	3918.27	4712.58	4519.38	4705.13	4512.48	4893.09	4499.45	3806.18	4820.52	4524.14	4366.73	5334.11
PR_71197	3-hydroxyisobutyrate dehydrogenase [Rhodopirellula baltica SH 1]	NULL	GO:0003674_GO:0003824_GO:0004616_GO:0005975_GO:0005996_GO:0006006_GO:0006007_GO:0006066_GO:0006098_GO:0006139_GO:0006732_GO:0006733_GO:0006739_GO:0006740_GO:0006753_GO:0006766_GO:0006767_GO:0006769_GO:0008150_GO:0008152_GO:0009056_GO:0009057_GO:0009117_GO:0009987_GO:0016052_GO:0016491_GO:0016614_GO:0016616_GO:0019318_GO:0019320_GO:0019362_GO:0043170_GO:0044237_GO:0044238_GO:0044248_GO:0044260_GO:…	NULL	NULL	NULL	NULL	0.0914878	4512.05	NULL	5332.28	4482.87	4364.74	4544.58	5378.17	4457.81	4503.19	4321.87	4485.69	4134.16	3753.1	4417.02	4481.19
PR_53357	adaptor-related protein complex 3, mu 2 subunit [Homo sapiens]	NULL	GO:0003674_GO:0005488_GO:0005515_GO:0005575_GO:0005622_GO:0005623_GO:0005737_GO:0006810_GO:0006886_GO:0008104_GO:0008150_GO:0009987_GO:0015031_GO:0016020_GO:0016192_GO:0030117_GO:0030118_GO:0030119_GO:0030131_GO:0032991_GO:0033036_GO:0034613_GO:0043234_GO:0044424_GO:0044425_GO:0044444_GO:0044464_GO:0045184_GO:0046907_GO:0048475_GO:0051179_GO:0051234_GO:0051641_GO:0051649	NULL	NULL	NULL	NULL	0.0672398	4498.09	NULL	5194.93	4396.67	3924.96	4823.78	4614.58	4345.66	4193.15	4466.89	4313.05	4323.28	4559.46	4720.28	4598.45
PR_80041	pyridoxal kinase [Chlamydomonas reinhardtii]	NULL	GO:0003674_GO:0003824_GO:0006766_GO:0006767_GO:0008150_GO:0008152_GO:0008478_GO:0008614_GO:0008615_GO:0009058_GO:0009110_GO:0009987_GO:0016301_GO:0016740_GO:0016772_GO:0016773_GO:0042364_GO:0042816_GO:0042819_GO:0044237_GO:0044249	NULL	NULL	NULL	NULL	0.10122	4471.76	NULL	5144.03	4988.02	4529.24	4302.38	4456.44	4917.23	4683.25	3763.18	4078.07	4479.57	4512.79	4767.68	3510.95
PR_94399		NULL	NULL	NULL	NULL	NULL	NULL	0.101571	4465.59	NULL	4399.84	4799	4336.97	4291.98	3709.52	4749.36	4408.28	4658.01	4616.27	4513.01	5056.07	5081.64	3432.77
PR_94311		NULL	GO:0008150_GO:0009987_GO:0019725_GO:0042592_GO:0045454_GO:0050789_GO:0050794_GO:0065007_GO:0065008	NULL	NULL	NULL	NULL	0.068325	4439.97	NULL	4031.28	4162.25	4307.29	4366.14	4604.31	4679.18	4281.74	4501.9	4576.05	3906.7	5020.99	4858.64	4423.1
PR_74777		NULL	NULL	NULL	NULL	NULL	NULL	0.0925104	4426.61	NULL	4781.69	4426.93	3989.41	4360.55	4544.1	4257.34	3792.56	4112.76	4638.97	4848.15	5345.33	4512.63	3935.44
PR_73159	phosphoribosylpyrophosphate synthetase, putative [Plasmodium vivax SaI-1]	NULL	GO:0000287_GO:0003674_GO:0003824_GO:0004749_GO:0005488_GO:0006139_GO:0006753_GO:0008150_GO:0008152_GO:0009116_GO:0009117_GO:0009165_GO:0009987_GO:0016740_GO:0016772_GO:0016778_GO:0043167_GO:0044237_GO:0044238_GO:0046872_GO:0055086	NULL	NULL	NULL	NULL	0.0939789	4412.71	NULL	4524.78	4419.72	4860.65	4152	4047.27	3932.19	4024.49	4199.33	4223.94	4646.1	4380.88	4399.95	5553.99
PR_79629	Tumor susceptibility gene 101 [Homo sapiens]	NULL	GO:0003674_GO:0003824_GO:0006464_GO:0006810_GO:0008104_GO:0008150_GO:0008152_GO:0009987_GO:0015031_GO:0016874_GO:0016879_GO:0016881_GO:0019222_GO:0019538_GO:0019787_GO:0033036_GO:0034960_GO:0043170_GO:0043283_GO:0043412_GO:0043687_GO:0044237_GO:0044238_GO:0044260_GO:0044267_GO:0045184_GO:0050789_GO:0051179_GO:0051234_GO:0051246_GO:0060255_GO:0065007_GO:0080090	NULL	NULL	NULL	NULL	0.095681	4380.38	NULL	4999.86	3944.44	4037.9	3934.24	4103.35	4558.78	4199.92	4819.51	4757.63	5137.13	4503.06	3970.13	3978.96
PR_74850		NULL	GO:0003674_GO:0005488_GO:0005515_GO:0006139_GO:0006370_GO:0006396_GO:0006397_GO:0008150_GO:0008152_GO:0009452_GO:0009987_GO:0010467_GO:0016070_GO:0016071_GO:0034960_GO:0043170_GO:0043283_GO:0044237_GO:0044238_GO:0044260	NULL	NULL	NULL	NULL	0.101252	4362.26	NULL	4452.57	4261.83	4994.19	4936.93	4919.21	4308.4	4165.63	4849.37	4118.64	3613.11	4377.28	3674.38	4037.79
PR_96194		NULL	NULL	NULL	NULL	NULL	NULL	0.0907731	4349.62	NULL	4156.74	3945.73	4547.56	4580.16	5354.03	4429.77	4012.71	4182.49	4684.77	4051.11	4621.74	4133.78	3844.5
PR_95502	PREDICTED: similar to transcription factor Dp-1 [Monodelphis domestica]	NULL	GO:0003674_GO:0003676_GO:0003677_GO:0003700_GO:0005488_GO:0005575_GO:0005622_GO:0005623_GO:0005634_GO:0005654_GO:0005667_GO:0006355_GO:0008150_GO:0009889_GO:0010468_GO:0010556_GO:0019219_GO:0019222_GO:0030528_GO:0031323_GO:0031326_GO:0031974_GO:0031981_GO:0032991_GO:0043226_GO:0043227_GO:0043229_GO:0043231_GO:0043233_GO:0043234_GO:0044422_GO:0044424_GO:0044428_GO:0044446_GO:0044451_GO:0044464_GO:…	NULL	NULL	NULL	NULL	0.0834101	4335.98	NULL	4318.48	4000.61	4065.7	4631.63	4696.5	4498.67	3916.79	4624.83	5028.37	4092.81	4416.27	3657.97	4419.15
PR_84146		NULL	GO:0003674_GO:0005488_GO:0005515_GO:0005543_GO:0007154_GO:0008150_GO:0008289_GO:0009987_GO:0035091	NULL	NULL	NULL	NULL	0.0775793	4315.62	NULL	4352.45	4796.2	4605.26	4498.8	4796.98	4070.67	4144.67	4091.37	4317.4	4514.81	3770.69	4446.61	3697.2
PR_75381	Os06g0708100 [Oryza sativa (japonica cultivar-group)]	NULL	NULL	NULL	NULL	NULL	NULL	0.0960872	4289.85	NULL	3560.28	4244.94	4763.25	4537.14	4445.91	4441.7	4835.7	3946.66	3527.72	4672.26	3902.14	4429.98	4460.37
PR_94528	histone acetyltransferase [Physcomitrella patens subsp. patens]	NULL	GO:0003674_GO:0003824_GO:0005575_GO:0005622_GO:0005623_GO:0005634_GO:0008150_GO:0009889_GO:0010468_GO:0010556_GO:0016740_GO:0016746_GO:0016747_GO:0019219_GO:0019222_GO:0031323_GO:0031326_GO:0043226_GO:0043227_GO:0043229_GO:0043231_GO:0044424_GO:0044464_GO:0045449_GO:0050789_GO:0050794_GO:0060255_GO:0065007_GO:0080090	NULL	NULL	NULL	NULL	0.0764101	4228.36	NULL	4219.64	4254.52	4418.14	4428.54	3947.44	3975.62	3594.58	4497.46	4119.75	4697.55	4512.8	4562.79	3739.89
PR_81850		NULL	GO:0003674_GO:0005488_GO:0008270_GO:0043167_GO:0043169_GO:0046872_GO:0046914	NULL	NULL	NULL	NULL	0.0756405	4208.67	NULL	4272.15	4709.87	4555.25	4553.74	3944.52	3882.75	4518.22	3947.64	4202.35	4327.51	4038.29	4215.02	3545.45
PR_95841	predicted protein [Nematostella vectensis]	NULL	NULL	NULL	NULL	NULL	NULL	0.0847096	4161.86	NULL	4078.55	4123.96	4186.74	4505.27	4509.38	3761.12	4502.35	4512.46	3824.52	4233.7	3477.08	3759.45	4629.65
PR_77939	Nuclease precursor (Sr-nuclease)	NULL	GO:0003674_GO:0003676_GO:0003824_GO:0005488_GO:0016787_GO:0019842_GO:0031177_GO:0043167_GO:0046872	NULL	NULL	NULL	NULL	0.0722036	4132.92	NULL	4674.44	4206.37	4077.56	4226.26	4349.96	4274.53	4176.45	4114.6	3930.41	3922.34	4216.69	4245.61	3312.7
PR_73420	methionyl-tRNA synthetase [Dictyostelium discoideum AX4]	NULL	GO:0000166_GO:0003674_GO:0003824_GO:0004812_GO:0004825_GO:0005488_GO:0005524_GO:0005575_GO:0005622_GO:0005623_GO:0005737_GO:0006082_GO:0006139_GO:0006399_GO:0006412_GO:0006418_GO:0006431_GO:0006519_GO:0006520_GO:0006807_GO:0008150_GO:0008152_GO:0009058_GO:0009059_GO:0009308_GO:0009987_GO:0010467_GO:0016070_GO:0016874_GO:0016875_GO:0016876_GO:0017076_GO:0019538_GO:0019752_GO:0030554_GO:0032553_GO:…	NULL	NULL	NULL	NULL	0.0916506	4107.61	NULL	4245.03	4364	4777.91	4108.59	4427.24	4429.88	3584.93	3999.69	3555.06	3674.61	3963.85	4523.14	3744.96
PR_93452		NULL	NULL	NULL	NULL	NULL	NULL	0.0961302	4102.26	NULL	4447.46	4026.61	3254.72	3672.64	3751.71	4029.53	4339.24	4358.68	4874.47	4088.46	4243.39	4372.9	3869.55
PR_77214		NULL	GO:0000166_GO:0003674_GO:0003676_GO:0003677_GO:0003774_GO:0003777_GO:0003824_GO:0003916_GO:0003917_GO:0005488_GO:0005515_GO:0005524_GO:0005575_GO:0005622_GO:0005623_GO:0005694_GO:0005856_GO:0005875_GO:0006139_GO:0006259_GO:0006265_GO:0006810_GO:0007017_GO:0007018_GO:0008150_GO:0008152_GO:0009987_GO:0015630_GO:0016020_GO:0016192_GO:0016462_GO:0016787_GO:0016817_GO:0016818_GO:0016853_GO:0017076_GO:…	NULL	NULL	NULL	NULL	0.0871677	4045.67	NULL	3697.22	4100.89	3997.46	4173.26	4331.55	4477.86	4136.21	3955.82	3456.09	4291.85	3304.99	4514.58	4155.98
PR_81562		NULL	NULL	NULL	NULL	NULL	NULL	0.0822027	4028.29	NULL	4315.36	4843.98	4199.71	4119.57	3755.52	3966.29	3656.18	3838.37	3707.97	3805.41	4429.92	3965.1	3764.42
PR_93353	ubiquitin-conjugating enzyme [Phytophthora infestans]	NULL	GO:0003674_GO:0003824_GO:0006464_GO:0008150_GO:0008152_GO:0009987_GO:0016874_GO:0016879_GO:0016881_GO:0019222_GO:0019538_GO:0019787_GO:0034960_GO:0043170_GO:0043283_GO:0043412_GO:0043687_GO:0044237_GO:0044238_GO:0044260_GO:0044267_GO:0050789_GO:0051246_GO:0060255_GO:0065007_GO:0080090	NULL	NULL	NULL	NULL	0.101442	4015.51	NULL	4028.74	3873.56	4044.89	4458.49	3621.64	4105.46	4343.99	4334.47	4466.51	4038.64	4317.72	3600.53	2967.04
PR_71573	cystathionine beta-synthase [Phytophthora infestans]	NULL	GO:0000096_GO:0000097_GO:0003674_GO:0003824_GO:0004122_GO:0005488_GO:0005496_GO:0005575_GO:0005622_GO:0005623_GO:0005737_GO:0006082_GO:0006519_GO:0006520_GO:0006534_GO:0006535_GO:0006563_GO:0006790_GO:0006807_GO:0008150_GO:0008152_GO:0008289_GO:0008652_GO:0009058_GO:0009069_GO:0009070_GO:0009308_GO:0009309_GO:0009987_GO:0016829_GO:0016835_GO:0016836_GO:0019343_GO:0019344_GO:0019752_GO:0019842_GO:…	NULL	NULL	NULL	NULL	0.0935694	4011.1	NULL	4338.88	4213.83	3454.47	3930.7	3863.59	3583.79	4245.61	3937.68	4138.97	4322.14	4406.32	3228.43	4479.89
PR_77809		NULL	NULL	NULL	NULL	NULL	NULL	0.0694154	3948.91	NULL	4526.73	3853.73	4048.45	4127.38	4080.99	3733.03	3949.94	4001.48	3826.95	4044.78	3938.79	3962.46	3241.13
PR_86933		NULL	NULL	NULL	NULL	NULL	NULL	0.101608	3928.51	NULL	4073.81	3793.99	3942.07	4579.85	4066.2	4283.33	3604.32	4335.22	3842.89	3992.06	4188.37	3131.03	3237.49
PR_93951		NULL	GO:0003674_GO:0005215_GO:0005310_GO:0005342_GO:0005343_GO:0005575_GO:0005623_GO:0006810_GO:0006835_GO:0008150_GO:0008324_GO:0008509_GO:0015075_GO:0015291_GO:0015293_GO:0015294_GO:0015296_GO:0015370_GO:0015849_GO:0016020_GO:0017153_GO:0022804_GO:0022857_GO:0022891_GO:0022892_GO:0044464_GO:0046942_GO:0046943_GO:0051179_GO:0051234	NULL	NULL	NULL	NULL	0.0809962	3919.48	NULL	3695.09	3727.94	3555.47	3918.85	4303.02	3903.79	3722.46	4146.98	4388.91	4549.83	3486.89	3716.64	3837.4
PR_96429	PREDICTED: similar to two AAA domain containing protein [Apis mellifera]	NULL	GO:0000166_GO:0003674_GO:0003824_GO:0005488_GO:0005515_GO:0005524_GO:0005575_GO:0005623_GO:0006810_GO:0008150_GO:0008270_GO:0009987_GO:0016020_GO:0016021_GO:0016192_GO:0016462_GO:0016787_GO:0016817_GO:0016818_GO:0017076_GO:0017111_GO:0030554_GO:0031224_GO:0032553_GO:0032555_GO:0032559_GO:0043167_GO:0043169_GO:0044425_GO:0044464_GO:0046872_GO:0046914_GO:0051179_GO:0051234	NULL	NULL	NULL	NULL	0.0801533	3841.68	NULL	3807.23	3877.53	4062.36	4011.36	4666.9	3379.99	3649.44	3789.05	3778.4	3596.93	3473.49	3977.34	3871.87
PR_75461		TPSI	GO:0003674_GO:0003676_GO:0003677_GO:0005488_GO:0005515_GO:0046983	TPSI_0622	hAT	NULL	NULL	0.0878426	3792.05	NULL	4043.65	3988.14	3751.82	4463.84	3963.39	3188.92	3318.78	3798.3	4074.7	3624.34	3496.97	3986.22	3597.54
PR_77402		NULL	GO:0003674_GO:0003824_GO:0004221_GO:0006508_GO:0006511_GO:0008150_GO:0008152_GO:0009056_GO:0009057_GO:0009987_GO:0016787_GO:0016788_GO:0016790_GO:0019538_GO:0019941_GO:0030163_GO:0034960_GO:0034962_GO:0043170_GO:0043283_GO:0043285_GO:0043632_GO:0044237_GO:0044238_GO:0044248_GO:0044257_GO:0044260_GO:0044265_GO:0044267_GO:0051603	NULL	NULL	NULL	NULL	0.0781112	3781.31	NULL	3218.02	3635.38	4185.93	3673.38	3602.4	3383.67	3652.48	4159.71	3693.8	3864.94	3834.38	4211.59	4041.37
PR_96142	C2 calcium-dependent membrane targeting domain-containing protein [Dictyostelium discoideum AX4]	NULL	NULL	NULL	NULL	NULL	NULL	0.100879	3714.73	NULL	3467.92	4180.21	4258.06	3394.46	4284.02	3800.6	3885.98	3412.19	3260.75	3530.28	3285.82	3399.11	4132.06
PR_75796		NULL	NULL	NULL	NULL	NULL	NULL	0.0751646	3685.46	NULL	3667.8	3992.32	3683.97	3769.46	3278.03	3124.86	3701.71	3986.94	4068.44	3525.45	3894.37	3829.03	3388.62
PR_74108	ATP-binding cassette transporter, subfamily I, member 9, ABC component protein PpABCI9 [Physcomitrella patens subsp. patens]	NULL	GO:0000166_GO:0003674_GO:0003824_GO:0005488_GO:0005524_GO:0016462_GO:0016787_GO:0016817_GO:0016818_GO:0016887_GO:0017076_GO:0017111_GO:0030554_GO:0032553_GO:0032555_GO:0032559	NULL	NULL	NULL	NULL	0.0821096	3669.21	NULL	4125.59	4116.78	3405.41	3538.61	3397.35	3441	3271.86	3871.94	3668.23	3761.18	3568.25	4168.07	3365.48
PR_48562	ATB' BETA (Arabidopsis thaliana serine/threonine protein phosphatase 2A 55 kDa regulatory subunit B prime beta); protein phosphatase type 2A regulator	NULL	GO:0000159_GO:0003674_GO:0005575_GO:0005622_GO:0005623_GO:0007154_GO:0007165_GO:0008150_GO:0008287_GO:0008601_GO:0009987_GO:0019208_GO:0019888_GO:0030234_GO:0032991_GO:0043234_GO:0044424_GO:0044464_GO:0050789_GO:0050794_GO:0065007	NULL	NULL	NULL	NULL	0.0859857	3667.39	NULL	3294.09	3731.28	3685.38	3282.48	3459	4233.2	3879.38	3987.04	3294.83	3526.49	3469.46	4206.53	3626.9
PR_95996	predicted protein [Physcomitrella patens subsp. patens]	NULL	GO:0003674_GO:0003824_GO:0016787	NULL	NULL	NULL	NULL	0.0814869	3648.42	NULL	3846.58	3729.9	4053.84	3977.2	3563.5	3344.83	3029.28	3754.03	3288.65	3504.22	3491.08	3849.57	3996.78
PR_81830	Os08g0447200 [Oryza sativa (japonica cultivar-group)]	NULL	NULL	NULL	NULL	NULL	NULL	0.098756	3647.06	NULL	4129.08	4031.56	3699.43	3948.19	3262.46	3186.98	3491.78	3960.31	4115.93	3713.72	3580.14	3159.07	3133.19
PR_80368	splicing factor 3a protein, putative [Babesia bovis T2Bo]	NULL	GO:0003674_GO:0003676_GO:0005488_GO:0005575_GO:0005622_GO:0005623_GO:0008270_GO:0043167_GO:0043169_GO:0044464_GO:0046872_GO:0046914	NULL	NULL	NULL	NULL	0.0857115	3642.13	NULL	3469.67	3421.12	3949.66	3899.34	4178.97	3356.18	4010.13	3457.49	3557.88	3375.68	3747.93	3053.32	3870.37
PR_71576	ATP-dependent metalloprotease FtsH [Oceanicola granulosus HTCC2516]	NULL	GO:0000166_GO:0003674_GO:0003824_GO:0005488_GO:0005524_GO:0016462_GO:0016787_GO:0016817_GO:0016818_GO:0017076_GO:0017111_GO:0030554_GO:0032553_GO:0032555_GO:0032559	NULL	NULL	NULL	NULL	0.0999846	3595.36	NULL	3264.2	3575.34	3489.94	3447.13	3209.12	3319.56	3670.93	3899.91	3978.17	3892.14	4303.7	3763.74	2925.77
PR_94257	mannosyltransferase (Smp3), putative [Aspergillus clavatus NRRL 1]	NULL	GO:0003674_GO:0003824_GO:0005575_GO:0005622_GO:0005623_GO:0005737_GO:0005783_GO:0005789_GO:0006464_GO:0006497_GO:0006505_GO:0006506_GO:0006629_GO:0006643_GO:0006644_GO:0006650_GO:0008150_GO:0008152_GO:0008610_GO:0008654_GO:0009058_GO:0009059_GO:0009987_GO:0012505_GO:0016020_GO:0016740_GO:0016757_GO:0019538_GO:0030384_GO:0031090_GO:0031224_GO:0031227_GO:0031300_GO:0034645_GO:0034960_GO:0042157_GO:…	NULL	NULL	NULL	NULL	0.0988889	3562.18	NULL	3862.59	3680.5	3295.39	3611.01	3555.13	4181.18	3270.32	3676.23	3953.96	3476.16	3757.17	2759.64	3229.1
PR_85422		NULL	NULL	NULL	NULL	NULL	NULL	0.100667	3554.14	NULL	3837.45	3099.62	3294.8	3192.94	4315.79	3594.22	3920.36	3772.76	3660.86	3833.67	3168.24	3243.41	3269.69
PR_74856	cytoplasm protein [Cryptococcus neoformans var. neoformans JEC21]	NULL	NULL	NULL	NULL	NULL	NULL	0.0663737	3528.99	NULL	3553.88	3826.86	3428.63	3109.2	3905.09	3573.07	3370.22	3601.57	3362.29	3396.09	3246.99	3610.44	3892.47
PR_77975		NULL	NULL	NULL	NULL	NULL	NULL	0.0707385	3490.06	NULL	3259.9	3799.81	3526.94	3336.01	3378.07	3854.38	3376.96	3670.99	3440.55	3294.07	3485.49	3034.43	3913.22
PR_76021	predicted protein [Monosiga brevicollis MX1]	NULL	GO:0003674_GO:0003824_GO:0005488_GO:0005515_GO:0008150_GO:0008152_GO:0016491	NULL	NULL	NULL	NULL	0.101259	3448.06	NULL	3590.6	3463.81	3504.65	3875.09	3175.11	3148.72	3560.06	2914.99	3053.11	3120.72	3550.93	4227.42	3639.6
PR_79779	ribonuclease III [Pseudomonas fluorescens PfO-1]	NULL	GO:0003674_GO:0003676_GO:0003723_GO:0003735_GO:0003824_GO:0004518_GO:0004519_GO:0004521_GO:0004525_GO:0004540_GO:0005198_GO:0005488_GO:0005575_GO:0005622_GO:0005623_GO:0005737_GO:0005840_GO:0006139_GO:0006396_GO:0006412_GO:0008150_GO:0008152_GO:0009058_GO:0009059_GO:0009987_GO:0010467_GO:0015934_GO:0016070_GO:0016787_GO:0016788_GO:0016891_GO:0016893_GO:0019538_GO:0030529_GO:0032991_GO:0033279_GO:…	NULL	NULL	NULL	NULL	0.0954834	3426.55	NULL	3355.76	3738.07	3950.66	3969.96	3529.51	3262.13	3023.5	3284.17	2962.23	3451.49	3184.26	3081.99	3751.46
PR_77006		TPSI	GO:0003674_GO:0003676_GO:0005488_GO:0008270_GO:0043167_GO:0043169_GO:0046872_GO:0046914	TPSI_2313	TY1_Copia	NULL	NULL	0.0948848	3419.35	NULL	2926.44	3335.39	3588.51	3145.52	3837.6	3787.81	3895.71	3580.16	3244.09	3138.85	3310.77	2933.9	3726.78
PR_75211	predicted protein [Nematostella vectensis]	NULL	NULL	NULL	NULL	NULL	NULL	0.0609703	3408.93	NULL	3472.39	3814.47	3514.33	3632.78	3258.81	3194.13	3616.81	3483.5	3134.43	3402.18	3128.48	3176.16	3487.69
PR_95441		NULL	GO:0003674_GO:0005488_GO:0008270_GO:0043167_GO:0043169_GO:0046872_GO:0046914	NULL	NULL	NULL	NULL	0.0986442	3384.67	NULL	3269.72	3921.71	3221.71	3770.4	3705.93	3862.63	2990.5	3198.95	3081.32	3437.97	3536.39	3142.45	2861.09
PR_79262	PREDICTED: similar to U2 small nuclear ribonucleoprotein A (U2 snRNP-A) [Tribolium castaneum]	NULL	GO:0003674_GO:0003676_GO:0005488_GO:0005515	NULL	NULL	NULL	NULL	0.0867831	3377.47	NULL	3392.98	3363.04	2904.74	3357.31	3109.12	3250.24	3422.41	3333.75	3064	3802.18	4080.5	3525.06	3301.76
PR_73642	predicted protein [Laccaria bicolor S238N-H82]	NULL	NULL	NULL	NULL	NULL	NULL	0.09444	3373.06	NULL	3695.61	3493.63	3749.9	3573.96	3567.71	3597.16	3266.56	3276.64	3731	3292.95	2917.43	2901.51	2785.71
PR_71117	acetate kinase [Clostridium novyi NT]	NULL	GO:0003674_GO:0003824_GO:0005575_GO:0005622_GO:0005623_GO:0006082_GO:0006793_GO:0006796_GO:0008150_GO:0008152_GO:0009987_GO:0016301_GO:0016310_GO:0016740_GO:0016772_GO:0016774_GO:0044237_GO:0044464	NULL	NULL	NULL	NULL	0.0986479	3369.8	NULL	3635.34	3527.96	3271.38	3280.95	2937.85	3718.94	2955.28	3291.34	2994.93	3098.6	3727.05	4069.9	3297.91
PR_73611		NULL	NULL	NULL	NULL	NULL	NULL	0.09774	3335	NULL	2890.86	3529.47	3210.36	3756.14	3583.59	3005.93	3749.11	3595	3257.02	3622.01	2850.61	3430.29	2874.61
PR_85606		NULL	NULL	NULL	NULL	NULL	NULL	0.0824017	3292.33	NULL	3428.18	3432.54	3747.61	3623.09	3356.63	3277.77	2910.68	3106.5	2918.16	2824.11	3528.07	3304.53	3342.44
PR_80367		NULL	GO:0003674_GO:0003676_GO:0005488_GO:0005515_GO:0008270_GO:0043167_GO:0043169_GO:0046872_GO:0046914	NULL	NULL	NULL	NULL	0.10084	3265.25	NULL	3757.46	2959.16	2761.18	3391.27	3519.42	3759.67	3238.08	3442.37	3485.68	3383.22	3037.86	2939.96	2772.99
PR_86270	Kinesin heavy chain (Synkin)	NULL	GO:0000166_GO:0003674_GO:0003774_GO:0003777_GO:0003824_GO:0005488_GO:0005524_GO:0005575_GO:0005622_GO:0005623_GO:0005856_GO:0005875_GO:0006810_GO:0006950_GO:0006952_GO:0007017_GO:0007018_GO:0008150_GO:0009279_GO:0009987_GO:0015630_GO:0016020_GO:0016462_GO:0016787_GO:0016817_GO:0016818_GO:0017076_GO:0017111_GO:0019867_GO:0030312_GO:0030313_GO:0030554_GO:0030705_GO:0031975_GO:0032553_GO:0032555_GO:…	NULL	NULL	NULL	NULL	0.0769253	3228.19	NULL	3040.31	3061.19	3717.32	3512.78	3469.26	3037.13	2763.56	3087.37	3141.44	3406.01	3284.75	3071.82	3373.56
PR_80231		NULL	GO:0000166_GO:0003674_GO:0003824_GO:0004672_GO:0004674_GO:0004713_GO:0005488_GO:0005524_GO:0006464_GO:0006468_GO:0006793_GO:0006796_GO:0008150_GO:0008152_GO:0009987_GO:0016301_GO:0016310_GO:0016740_GO:0016772_GO:0016773_GO:0017076_GO:0019538_GO:0030554_GO:0032553_GO:0032555_GO:0032559_GO:0034960_GO:0043170_GO:0043283_GO:0043412_GO:0043687_GO:0044237_GO:0044238_GO:0044260_GO:0044267	NULL	NULL	NULL	NULL	0.0924369	3208.84	NULL	3471.77	3110.52	3351.23	3260.56	3311.86	3630.11	2656.97	3349.26	3675.86	3015.24	2994.07	3152.79	2734.72
PR_93510	TB2/DP1, HVA22 family protein [Tetrahymena thermophila SB210]	NULL	NULL	NULL	NULL	NULL	NULL	0.0749103	3169.32	NULL	3072.37	3291.87	3257.74	3163.75	3579.41	3250.02	3495.88	3132.35	3253.32	3178.82	2959.81	2598.35	2967.48
PR_73833		TPSI	NULL	TPSI_4520	MuDR_A_B	NULL	NULL	0.0946546	3152.3	NULL	3010.29	3561.28	2767.01	2900.37	3147.56	3384.1	3452.12	3080.3	3090.13	3406.06	3479.8	3205.04	2495.86
PR_74434		NULL	NULL	NULL	NULL	NULL	NULL	0.0892658	3147.79	NULL	3316.73	3001.94	2570.71	3210.15	3499.36	3346.44	3274.79	3659.22	3161.92	3055.59	3141.16	2878.97	2804.36
PR_84761		NULL	NULL	NULL	NULL	NULL	NULL	0.100092	3104.27	NULL	3093.47	3638.07	2832.6	3270.74	2896.86	3005.74	2593.3	3526.59	3265.42	3506.1	3102.74	2906.65	2717.23
PR_80420	Serine carboxypeptidase family protein [Tetrahymena thermophila SB210]	NULL	GO:0003674_GO:0003824_GO:0004180_GO:0004185_GO:0006508_GO:0008150_GO:0008152_GO:0008233_GO:0008236_GO:0008238_GO:0009987_GO:0016787_GO:0017171_GO:0019538_GO:0034960_GO:0043170_GO:0043283_GO:0044237_GO:0044238_GO:0044260_GO:0044267_GO:0070008_GO:0070011	NULL	NULL	NULL	NULL	0.1011	3091.11	NULL	3016.84	3459.95	3302.89	3118.83	3542.4	3130.84	3259.71	3166.52	3011.92	3220.39	2603.82	2331.18	3019.18
PR_95362		NULL	NULL	NULL	NULL	NULL	NULL	0.0720063	3090.25	NULL	2688.12	3418.12	3244.96	3006.56	2943.77	2856.11	3208.1	3007.9	3188.77	3202.37	2980.09	2912.98	3515.39
PR_76742		NULL	NULL	NULL	NULL	NULL	NULL	0.0986785	3024.17	NULL	2848.67	3476.92	3071.11	2607.76	2909.93	3159.38	2837.13	2484.44	3195.24	3157.06	2783.74	3306.88	3475.89
PR_74096		NULL	NULL	NULL	NULL	NULL	NULL	0.100309	3016.9	NULL	2982.49	2997.22	3313.23	2820.88	2683.35	3193.36	2725.51	3164.4	2976.21	3197.25	3328.46	2342.87	3494.52
PR_81171		NULL	NULL	NULL	NULL	NULL	NULL	0.0722562	3007.53	NULL	3294.5	2677.88	2841.68	3225.61	3182.84	3335.95	2673.97	2814.61	3162.97	3021.02	3091.04	2908.34	2867.53
PR_84701		NULL	NULL	NULL	NULL	NULL	NULL	0.0940556	2923.66	NULL	2706.72	2537.62	3020.55	2581.45	2787.99	3056.45	2741.11	3071.85	3053.31	3199.67	2788.8	3597.76	2864.28
PR_84881	SET and MYND domain containing 1 [Mus musculus]	NULL	GO:0003674_GO:0005488_GO:0008270_GO:0043167_GO:0043169_GO:0046872_GO:0046914	NULL	NULL	NULL	NULL	0.0870709	2894.35	NULL	2503.1	2822.34	2962.6	3076.11	2494.03	3247.46	3283.81	3101.43	2668.83	2887.6	3101.24	2674.92	2803.14
PR_73213	O1 [Plasmodium falciparum]	NULL	NULL	NULL	NULL	NULL	NULL	0.101425	2890.5	NULL	2875.03	2832.86	2550.2	2801.26	2236.23	3245.02	2834.45	3029.69	2870.45	2934.74	3157.66	3456.91	2752
PR_82951	Os05g0279400 [Oryza sativa (japonica cultivar-group)]	NULL	GO:0003674_GO:0003676_GO:0005488_GO:0005515_GO:0005575_GO:0005622_GO:0005623_GO:0008270_GO:0043167_GO:0043169_GO:0044464_GO:0046872_GO:0046914	NULL	NULL	NULL	NULL	0.10116	2851.28	NULL	2986.46	2870.37	3060.64	2973.82	3254.02	2778.84	2619.62	3078.47	2543.28	2694.46	2523.62	2339.39	3343.68
PR_78376		NULL	NULL	NULL	NULL	NULL	NULL	0.0938442	2848.57	NULL	3055.67	2784.31	2206.09	3029.35	3034.03	2798.94	2727.67	3000.42	2708.48	2875.17	3362.66	2876.77	2571.87
PR_81272		NULL	NULL	NULL	NULL	NULL	NULL	0.0988839	2802.55	NULL	3058.6	2706.49	2695.82	2977.8	2350.46	2918.76	2587.33	3112.5	2753.66	2951.72	3214.07	2871.31	2234.65
PR_96037	Sel1l protein [Culex pipiens quinquefasciatus]	NULL	NULL	NULL	NULL	NULL	NULL	0.0866799	2737.84	NULL	2574.57	2711.28	2918.44	2769.16	3095.11	2637.55	2940.64	2789.64	2707.75	3090.32	2601.89	2169.52	2586
PR_85327		NULL	NULL	NULL	NULL	NULL	NULL	0.0925686	2731.02	NULL	2998.72	3123.81	3080.96	3028.19	2469.23	2866.41	2604.47	2508.11	2449.34	2403.35	2808.11	2536.22	2626.33
PR_77632	zinc finger protein [Ciona intestinalis]	NULL	GO:0003674_GO:0005488_GO:0005575_GO:0005622_GO:0005623_GO:0008270_GO:0043167_GO:0043169_GO:0044464_GO:0046872_GO:0046914	NULL	NULL	NULL	NULL	0.07945	2701.71	NULL	2856.34	2736.83	2534.32	2730.45	2398.06	2666.39	2557.29	2909.95	2450.83	2703.52	3022.06	3102.18	2453.99
PR_73658		NULL	GO:0003674_GO:0003676_GO:0003677_GO:0005488	NULL	NULL	NULL	NULL	0.0716448	2691.26	NULL	2608.79	2751.76	3024.37	2909.42	2754.64	2769.51	2785.06	2730.85	2341.33	2647.02	2785.72	2567.74	2310.22
PR_95327	predicted protein [Nematostella vectensis]	NULL	GO:0000166_GO:0003674_GO:0003824_GO:0004091_GO:0004806_GO:0005488_GO:0005525_GO:0006605_GO:0006612_GO:0006613_GO:0006614_GO:0006629_GO:0006810_GO:0006886_GO:0008104_GO:0008150_GO:0008152_GO:0009987_GO:0015031_GO:0016298_GO:0016787_GO:0016788_GO:0017076_GO:0019001_GO:0032553_GO:0032555_GO:0032561_GO:0033036_GO:0034613_GO:0044238_GO:0045047_GO:0045184_GO:0046907_GO:0051179_GO:0051234_GO:0051641_GO:…	NULL	NULL	NULL	NULL	0.097289	2687.29	NULL	2682.88	3072.61	3020.32	2599.63	2871.12	2690.41	2665.02	2667	2815.33	1979.63	2738.19	2428.92	2703.76
PR_80083	PREDICTED: similar to pseudouridylate synthase 1 isoform 1 [Macaca mulatta]	NULL	GO:0001522_GO:0003674_GO:0003735_GO:0003824_GO:0005198_GO:0005575_GO:0005622_GO:0005623_GO:0005737_GO:0005840_GO:0006139_GO:0006396_GO:0006399_GO:0006412_GO:0008033_GO:0008150_GO:0008152_GO:0009058_GO:0009059_GO:0009451_GO:0009982_GO:0009987_GO:0010467_GO:0016070_GO:0016853_GO:0016866_GO:0019538_GO:0030529_GO:0032991_GO:0034470_GO:0034645_GO:0034660_GO:0034960_GO:0034961_GO:0043170_GO:0043226_GO:…	NULL	NULL	NULL	NULL	0.0947631	2668.66	NULL	2655.38	2829.63	2870.11	2630.25	2585.25	3213.28	2588.28	2481.06	2453.7	2495.21	2991.3	2715.69	2183.45
PR_77565		NULL	NULL	NULL	NULL	NULL	NULL	0.0991595	2657.88	NULL	2608.43	2233.57	2691.86	2499.15	2489.84	2927.85	2580.49	2649.47	2775.29	3242.23	2803.67	2821.33	2229.21
PR_79396		NULL	NULL	NULL	NULL	NULL	NULL	0.0776195	2645.74	NULL	2916.66	3048.72	2436.15	2687.07	2468.35	2692.61	2432.7	2350.13	2643.04	2630.46	2921.93	2673.08	2493.69
PR_87605		NULL	NULL	NULL	NULL	NULL	NULL	0.0853765	2645.57	NULL	2365.6	2594.42	2925.28	2573.42	2430.49	2870.24	2310.17	2568.34	2504.81	2586.26	2795.39	3122.97	2745.07
PR_94035		NULL	GO:0003674_GO:0003676_GO:0005488	NULL	NULL	NULL	NULL	0.0977275	2627.96	NULL	2479.76	2805.56	2796.23	2616.84	2434.44	2540.46	2070.78	3084.5	2773.65	2771.32	2463.53	2398.42	2928.01
PR_74493	CASP C terminal, putative [Oryza sativa (japonica cultivar-group)]	NULL	GO:0003674_GO:0003676_GO:0003677_GO:0003824_GO:0003916_GO:0003917_GO:0005488_GO:0005575_GO:0005622_GO:0005623_GO:0005694_GO:0006139_GO:0006259_GO:0006265_GO:0008150_GO:0008152_GO:0009987_GO:0016853_GO:0034960_GO:0043170_GO:0043226_GO:0043228_GO:0043229_GO:0043232_GO:0043283_GO:0044237_GO:0044238_GO:0044260_GO:0044424_GO:0044464	NULL	NULL	NULL	NULL	0.0687217	2603.64	NULL	2765.23	2924.83	2597.21	2658.84	2785.38	2251.63	2532.98	2669.85	2729.94	2550.74	2611.86	2348.56	2420.26
PR_77424	PREDICTED: similar to CG3060-PA [Nasonia vitripennis]	NULL	GO:0000151_GO:0003674_GO:0005488_GO:0005515_GO:0005575_GO:0005622_GO:0005623_GO:0006508_GO:0006511_GO:0008150_GO:0008152_GO:0009056_GO:0009057_GO:0009987_GO:0019538_GO:0019899_GO:0019941_GO:0030163_GO:0031461_GO:0031625_GO:0032991_GO:0034960_GO:0034962_GO:0043170_GO:0043234_GO:0043283_GO:0043285_GO:0043632_GO:0044237_GO:0044238_GO:0044248_GO:0044257_GO:0044260_GO:0044265_GO:0044267_GO:0044424_GO:…	NULL	NULL	NULL	NULL	0.0837546	2598.27	NULL	2533.98	2661.16	3077.14	2758.29	2600.51	2431.69	2392.18	2594.1	2499.15	2562.06	2171.18	2599.75	2896.34
PR_74739		NULL	GO:0005575_GO:0005623_GO:0016020_GO:0016021_GO:0031224_GO:0044425_GO:0044464	NULL	NULL	NULL	NULL	0.0862743	2574.19	NULL	2631.27	2175.34	2521.63	2326.4	2405.6	3108.63	2704.74	2458.65	2608.75	2556.58	2825.31	2624.01	2517.55
PR_73843		NULL	NULL	NULL	NULL	NULL	NULL	0.101621	2546.98	NULL	2758.59	2437.82	2380.32	3008.75	2874	2213.04	2770.54	2205.28	2245.81	2338.29	2554.1	2778.66	2545.49
PR_84731	cation diffusion facilitator 10 (ISS) [Ostreococcus tauri]	NULL	GO:0003674_GO:0005215_GO:0005575_GO:0005623_GO:0006810_GO:0006811_GO:0006812_GO:0008150_GO:0008324_GO:0015075_GO:0016020_GO:0022857_GO:0022891_GO:0022892_GO:0044464_GO:0051179_GO:0051234	NULL	NULL	NULL	NULL	0.0763151	2532.82	NULL	2332.39	2355.87	2264.15	2465.42	2452.47	2716.45	2543.45	2546.79	2294.65	2636.55	2853.39	2579.22	2885.82
PR_75646		NULL	NULL	NULL	NULL	NULL	NULL	0.0824503	2514.26	NULL	2819.85	2691.16	2350.62	2561.9	2332.57	2689.69	2310.76	2765.64	2553.19	2459.75	2675.35	2400.08	2074.86
PR_74532		NULL	NULL	NULL	NULL	NULL	NULL	0.102014	2477.84	NULL	2515.19	2054.67	2564.19	2876.14	2687.06	2371.88	2743	2581.28	2610.94	2494.72	2342.93	1920.11	2449.78
PR_93483		NULL	GO:0003674_GO:0003824_GO:0004835_GO:0006464_GO:0008150_GO:0008152_GO:0009987_GO:0016874_GO:0016879_GO:0016881_GO:0019538_GO:0034960_GO:0043170_GO:0043283_GO:0043412_GO:0044237_GO:0044238_GO:0044260_GO:0044267	NULL	NULL	NULL	NULL	0.0933894	2413.57	NULL	2387.2	2324.41	2798.25	2408.97	2260.77	2614.09	2020.94	2575.64	2275.2	2348.78	2714.23	2068.98	2579
PR_78470		NULL	NULL	NULL	NULL	NULL	NULL	0.0843619	2393.63	NULL	2562.05	2398.76	2065.51	2224.8	2221.15	2090.69	2200.17	2666.2	2510.65	2463.4	2590.71	2465.42	2657.7
PR_71159	importin alpha [Toxoplasma gondii]	NULL	GO:0003674_GO:0005215_GO:0005575_GO:0005622_GO:0005623_GO:0005634_GO:0005635_GO:0005643_GO:0005737_GO:0006605_GO:0006606_GO:0006810_GO:0006886_GO:0006913_GO:0008104_GO:0008150_GO:0008565_GO:0009987_GO:0012505_GO:0015031_GO:0016020_GO:0016021_GO:0017038_GO:0022892_GO:0031224_GO:0031967_GO:0031975_GO:0032991_GO:0033036_GO:0033365_GO:0034504_GO:0034613_GO:0043226_GO:0043227_GO:0043229_GO:0043231_GO:…	NULL	NULL	NULL	NULL	0.0944635	2392.33	NULL	2829.99	2643.13	2376.59	2361.21	2658.27	1994.44	2381.17	2449.77	2373.22	2469.17	2328.93	2201.24	2033.18
PR_78238		NULL	NULL	NULL	NULL	NULL	NULL	0.0840156	2312.17	NULL	2592.61	2473.81	2361.24	2488.15	2232.43	1965.13	2187.53	2278.56	2480.55	2491.21	2395.76	1985.14	2126.12
PR_94792		NULL	NULL	NULL	NULL	NULL	NULL	0.0856828	2285.57	NULL	2315.76	1963.66	2451.75	2315.35	2398.52	2289.54	2399.58	2335.62	2440.1	1896	2135.9	2141.06	2629.54
PR_75647		NULL	GO:0003674_GO:0003676_GO:0005488_GO:0005529_GO:0030246	NULL	NULL	NULL	NULL	0.0965659	2250.97	NULL	2284.06	2373.98	2312.89	2123.55	2072.96	2253.99	2168.73	2320.25	2205.56	2099.61	2863.81	2295.77	1887.48
PR_73873		NULL	NULL	NULL	NULL	NULL	NULL	0.101083	2247.14	NULL	2399.09	2073.16	2576.78	2571.09	2456.41	2407.68	2192.26	2174.12	2109.99	2086.12	1845.53	1931.43	2389.2
PR_80848	PREDICTED: similar to CGI-79 protein isoform 1 [Bos taurus]	NULL	GO:0003674_GO:0003676_GO:0005488	NULL	NULL	NULL	NULL	0.0984456	2230.91	NULL	2262.33	2634.87	2670.39	2231.83	2173.53	2062.88	2126.86	2373.18	2273.72	2021.76	2204.73	2120.44	1845.33
PR_79878		NULL	GO:0003674_GO:0003676_GO:0003677_GO:0005488_GO:0005515_GO:0005575_GO:0005622_GO:0005623_GO:0005634_GO:0006139_GO:0006350_GO:0008150_GO:0008152_GO:0009058_GO:0009059_GO:0009987_GO:0010467_GO:0030528_GO:0034645_GO:0034960_GO:0034961_GO:0043170_GO:0043226_GO:0043227_GO:0043229_GO:0043231_GO:0043283_GO:0043284_GO:0044237_GO:0044238_GO:0044249_GO:0044260_GO:0044424_GO:0044464	NULL	NULL	NULL	NULL	0.0965471	2198.95	NULL	2057.83	2233.39	2309.41	2417.89	2367.21	2450.09	2304.47	2223.19	1879.17	2130.36	1699.65	2395.83	2117.89
PR_75084		NULL	NULL	NULL	NULL	NULL	NULL	0.0970734	2182.1	NULL	2521.14	1774.1	2160	2245.43	2049.93	2192.76	2408.01	2158.87	2494.16	2044.48	2238.59	1855.13	2224.66
PR_82164		NULL	NULL	NULL	NULL	NULL	NULL	0.0950144	2131.74	NULL	2169.16	1987.77	2252.34	2150.06	1937.17	2139.54	2234.79	1983.25	2033.3	1880.33	2114.44	2724.91	2105.55
PR_81933		NULL	NULL	NULL	NULL	NULL	NULL	0.0977619	2130.38	NULL	2379.74	2050.87	1849.26	2185.07	2507.31	1816.31	2064.82	2353.83	2395.1	2041.81	2052.45	1997.42	2000.95
PR_86109		NULL	NULL	NULL	NULL	NULL	NULL	0.0947719	2107.61	NULL	2359.3	1957.9	1922	1961.24	2190.22	2134.56	2124.34	2102.28	2418.64	2231.13	2359.19	1936.12	1702.06
PR_54550	exodeoxyribonuclease III Xth [candidate division TM7 genomosp. GTL1]	NULL	GO:0003674_GO:0003676_GO:0003677_GO:0003824_GO:0004518_GO:0004519_GO:0005488_GO:0005575_GO:0005622_GO:0005623_GO:0006139_GO:0006259_GO:0006281_GO:0006950_GO:0006974_GO:0008150_GO:0008152_GO:0009987_GO:0016787_GO:0016788_GO:0033554_GO:0034960_GO:0034984_GO:0043170_GO:0043283_GO:0044237_GO:0044238_GO:0044260_GO:0044464_GO:0050896_GO:0051716	NULL	NULL	NULL	NULL	0.086608	2084.12	NULL	2420.24	2196.52	2219.07	2348.29	1888.97	2010.23	2058.97	1994.55	2021.53	1978.27	2089.78	1713.04	2154.08
PR_72591	cyclin H-1 [Zea mays]	NULL	NULL	NULL	NULL	NULL	NULL	0.0953983	2036.87	NULL	2275.02	1952.2	2103.19	2331.41	1659.38	2026.53	2010.12	1763.53	2061.53	1828.46	2285.65	2145.71	2036.63
PR_84386		NULL	NULL	NULL	NULL	NULL	NULL	0.0768663	2028.58	NULL	1884.9	2051.44	1845.26	2014.39	2146.09	1697.27	1992.88	2154.06	2190.68	2145.17	1920.41	2290.97	2038.05
PR_82056	mitogen-activated protein kinase [Dunaliella salina]	NULL	GO:0000166_GO:0003674_GO:0003824_GO:0004672_GO:0004674_GO:0004702_GO:0004707_GO:0004713_GO:0004871_GO:0005057_GO:0005488_GO:0005524_GO:0006464_GO:0006468_GO:0006793_GO:0006796_GO:0008150_GO:0008152_GO:0009987_GO:0016301_GO:0016310_GO:0016740_GO:0016772_GO:0016773_GO:0017076_GO:0019538_GO:0030554_GO:0032553_GO:0032555_GO:0032559_GO:0034960_GO:0043170_GO:0043283_GO:0043412_GO:0043687_GO:0044237_GO:…	NULL	NULL	NULL	NULL	0.0958757	2010.77	NULL	2287.72	2113.71	1714.01	2196.63	1828.83	2125.56	1798.27	2199.36	1961.07	2022.93	2216.67	1693.96	1981.31
PR_79170		NULL	NULL	NULL	NULL	NULL	NULL	0.0829219	2001.56	NULL	2037.05	2331.48	2059.26	1809.45	2034.02	1878.8	2013.28	2193.62	1715.26	2168.77	2037.67	1938.7	1802.96
PR_93923		NULL	NULL	NULL	NULL	NULL	NULL	0.0954019	1982.98	NULL	1659.11	2228.02	2290.64	2127.73	2156.47	1783.19	2011.44	2053.07	1813.77	1739.86	1881.65	2082.72	1951.03
PR_80094	fructose-2,6-bisphosphatase (FBP26) [Pichia stipitis CBS 6054]	NULL	GO:0000166_GO:0003674_GO:0003824_GO:0005488_GO:0005524_GO:0005975_GO:0005996_GO:0006000_GO:0006003_GO:0006066_GO:0008150_GO:0008152_GO:0009987_GO:0017076_GO:0019318_GO:0030554_GO:0032553_GO:0032555_GO:0032559_GO:0044237_GO:0044238_GO:0044262	NULL	NULL	NULL	NULL	0.088394	1927.58	NULL	1904.23	2124.93	1805.8	2117.98	1574.47	2084.43	1863.33	1758.31	2170.29	1751.32	1889.51	2026.07	1987.91
PR_74757	PREDICTED: similar to CG5037-PA [Tribolium castaneum]	NULL	GO:0003674_GO:0003824_GO:0004311_GO:0004659_GO:0005575_GO:0005623_GO:0006778_GO:0006779_GO:0006783_GO:0008150_GO:0008152_GO:0008495_GO:0009058_GO:0009987_GO:0016020_GO:0016021_GO:0016740_GO:0016765_GO:0031224_GO:0033013_GO:0033014_GO:0042168_GO:0042440_GO:0044237_GO:0044249_GO:0044425_GO:0044464_GO:0046148_GO:0046483_GO:0051186_GO:0051188	NULL	NULL	NULL	NULL	0.0994301	1900.87	NULL	2196.71	1713.67	1627.33	1708.92	1860.8	1633.02	1997.3	1942.39	1923.42	1828.34	1992.71	2226.98	2059.75
PR_81188		NULL	NULL	NULL	NULL	NULL	NULL	0.0996892	1884.13	NULL	1922.98	1846.49	1692.44	1919.68	1908.83	2026.95	1945.45	2255.29	1810.09	2171.92	1677.31	1762.76	1553.44
PR_86339		NULL	NULL	NULL	NULL	NULL	NULL	0.097214	1882.84	NULL	2119.24	1734.6	1497.91	1828.06	1914.41	1767.07	1909.81	2075.13	1989.08	2123.48	2027.82	1859.68	1630.54
PR_73577		NULL	GO:0003674_GO:0003676_GO:0005488_GO:0005575_GO:0005622_GO:0005623_GO:0008270_GO:0043167_GO:0043169_GO:0044464_GO:0046872_GO:0046914	NULL	NULL	NULL	NULL	0.0851477	1799.08	NULL	1973.35	1707.11	1657.55	2074.38	2091.74	1604.08	1814.9	1800.48	1660.9	1786.53	1797.08	1634.63	1785.37
PR_93503	PREDICTED: similar to set domain protein [Nasonia vitripennis]	NULL	NULL	NULL	NULL	NULL	NULL	0.0905079	1798.13	NULL	1896.11	1894.53	1632.92	1689.91	1774.78	2035.01	1834.52	1454.56	1720.18	1802.3	1646.09	2027.39	1967.32
PR_80621		NULL	NULL	NULL	NULL	NULL	NULL	0.0973488	1776.83	NULL	1836.65	1886.52	1974.6	1601.85	1795.35	1692.56	1643.4	2039.19	1880.2	2005.44	1689.62	1610.05	1443.41
PR_80480		NULL	GO:0003674_GO:0005488_GO:0008270_GO:0043167_GO:0043169_GO:0046872_GO:0046914	NULL	NULL	NULL	NULL	0.0961573	1750.44	NULL	1788.07	1879.26	2003.3	2010.26	1534.38	1601.92	1692.63	1828.01	1785.16	1724.78	1858.88	1412.57	1636.55
PR_73194		NULL	NULL	NULL	NULL	NULL	NULL	0.100011	1737.74	NULL	1753.19	1853.74	1609.46	2052.33	1610	1670.38	1465.46	1617	1644.92	1835.78	2083.72	1777.2	1617.43
PR_93518	RluA-2 CG6187-PA [Drosophila melanogaster]	NULL	GO:0003674_GO:0003676_GO:0003723_GO:0005488	NULL	NULL	NULL	NULL	0.0838164	1628.28	NULL	1556.01	1691.25	1523.12	1606.52	1776.46	1446.38	1837.93	1407.54	1634.98	1867	1538.99	1576	1705.43
PR_74853		NULL	NULL	NULL	NULL	NULL	NULL	0.0791832	1589.01	NULL	1692.46	1641.6	1350.03	1741.31	1508.38	1720.65	1695.16	1555.87	1539.59	1727.11	1389.13	1473.77	1622
PR_76726		NULL	GO:0000062_GO:0003674_GO:0005488_GO:0005504_GO:0008289_GO:0048037_GO:0050662	NULL	NULL	NULL	NULL	0.0939065	1573.28	NULL	1699.54	1537.69	1572.41	1424.66	1571.53	1852.24	1491.41	1465.65	1728.09	1532.25	1799.6	1347.57	1429.98
PR_74252	adenylyl cyclase, CYR (ISS) [Ostreococcus tauri]	NULL	GO:0003674_GO:0003824_GO:0006139_GO:0006753_GO:0007154_GO:0007165_GO:0007242_GO:0008150_GO:0008152_GO:0009117_GO:0009165_GO:0009187_GO:0009190_GO:0009987_GO:0016829_GO:0016849_GO:0044237_GO:0044238_GO:0050789_GO:0050794_GO:0055086_GO:0065007	NULL	NULL	NULL	NULL	0.0815849	1538.66	NULL	1309.48	1554.85	1664.34	1586.15	1792.54	1542.67	1458.23	1624.46	1500.19	1452.16	1636.79	1534.64	1346.02
PR_80194	NAD-dependent epimerase/dehydratase [Jannaschia sp. CCS1]	NULL	NULL	NULL	NULL	NULL	NULL	0.0831939	1507.16	NULL	1600.78	1401.07	1602.7	1660.48	1426.91	1429.38	1237.24	1499.85	1547.67	1717.45	1396.56	1593.59	1479.44
PR_81247		NULL	NULL	NULL	NULL	NULL	NULL	0.0895518	1502.76	NULL	1669.08	1580.43	1563.28	1465.64	1517.88	1355.29	1345.62	1755.42	1599.95	1499.72	1412.66	1528.85	1242.11
PR_79918		NULL	NULL	NULL	NULL	NULL	NULL	0.0938238	1498.08	NULL	1338.19	1458.58	1581.82	1482.09	1547.35	1546.59	1316.92	1516.63	1498.65	1736.8	1770.98	1300.36	1380.04
PR_80832		NULL	NULL	NULL	NULL	NULL	NULL	0.0952509	1456.65	NULL	1339.51	1332.93	1591.21	1273.69	1307.5	1723.3	1563.43	1357.74	1470.22	1439.75	1684.66	1446.33	1406.16
PR_83382		NULL	NULL	NULL	NULL	NULL	NULL	0.0950512	1433.37	NULL	1482.19	1467.93	1535.38	1386.53	1479.71	1181.12	1481.43	1556.45	1615.51	1561.83	1204.62	1234.1	1447.01
PR_74717	GPI transamidase component Gpi16, putative [Aspergillus clavatus NRRL 1]	NULL	GO:0005575_GO:0005622_GO:0005623_GO:0005737_GO:0005783_GO:0005789_GO:0012505_GO:0016020_GO:0016021_GO:0030176_GO:0031090_GO:0031224_GO:0031227_GO:0031300_GO:0031301_GO:0032991_GO:0042175_GO:0042765_GO:0043226_GO:0043227_GO:0043229_GO:0043231_GO:0043234_GO:0044422_GO:0044424_GO:0044425_GO:0044432_GO:0044444_GO:0044446_GO:0044464	NULL	NULL	NULL	NULL	0.0880207	1427.01	NULL	1525.69	1511.56	1498.27	1327.93	1125.46	1499.35	1402.24	1374.69	1546.49	1531.37	1566.29	1262.96	1378.8
PR_94478		NULL	GO:0003674_GO:0003824_GO:0004221_GO:0006508_GO:0006511_GO:0008150_GO:0008152_GO:0009056_GO:0009057_GO:0009987_GO:0016787_GO:0016788_GO:0016790_GO:0019538_GO:0019941_GO:0030163_GO:0034960_GO:0034962_GO:0043170_GO:0043283_GO:0043285_GO:0043632_GO:0044237_GO:0044238_GO:0044248_GO:0044257_GO:0044260_GO:0044265_GO:0044267_GO:0051603	NULL	NULL	NULL	NULL	0.100577	1426.2	NULL	1582.27	1433.21	1430.04	1543.99	1333.5	1527.78	1477.88	1546.87	1296.25	1525.57	1521.37	1070.17	1251.65
PR_80331		NULL	NULL	NULL	NULL	NULL	NULL	0.099253	1412.57	NULL	1240.12	1619.45	1389.03	1513.89	1501.29	1465.09	1571.32	1493.63	1444.33	1474.52	1175.16	1298.95	1176.66
PR_85617	AT;CDCKD;3/CAK2AT/CDKD1;3 (CYCLIN-DEPENDENT KINASE D1;3); kinase/ protein kinase [Arabidopsis thaliana]	NULL	GO:0000166_GO:0003674_GO:0003824_GO:0004672_GO:0004674_GO:0004713_GO:0005488_GO:0005524_GO:0006464_GO:0006468_GO:0006793_GO:0006796_GO:0008150_GO:0008152_GO:0009987_GO:0016301_GO:0016310_GO:0016740_GO:0016772_GO:0016773_GO:0017076_GO:0019538_GO:0030554_GO:0032553_GO:0032555_GO:0032559_GO:0034960_GO:0043170_GO:0043283_GO:0043412_GO:0043687_GO:0044237_GO:0044238_GO:0044260_GO:0044267	NULL	NULL	NULL	NULL	0.0893283	1399.74	NULL	1301.67	1559.42	1365.02	1233.44	1279.02	1586.61	1462.61	1515.86	1264.3	1411.29	1581.77	1378.18	1257.42
PR_75147	predicted protein [Aspergillus terreus NIH2624]	NULL	GO:0003674_GO:0003824_GO:0005488_GO:0006508_GO:0008150_GO:0008152_GO:0008233_GO:0008237_GO:0008270_GO:0009987_GO:0016787_GO:0019538_GO:0034960_GO:0043167_GO:0043169_GO:0043170_GO:0043283_GO:0044237_GO:0044238_GO:0044260_GO:0044267_GO:0046872_GO:0046914_GO:0070011	NULL	NULL	NULL	NULL	0.0963371	1360.66	NULL	1293.57	1312.55	1331.93	1343.8	1405.52	1360.82	1134.54	1257.92	1420.03	1388.65	1721.73	1451.16	1266.41
PR_83952	extracellular dioxygenase, putative [Aspergillus fumigatus A1163]	NULL	GO:0003674_GO:0003824_GO:0005488_GO:0005506_GO:0006725_GO:0008150_GO:0008152_GO:0008199_GO:0009987_GO:0043167_GO:0043169_GO:0044237_GO:0046872_GO:0046914	NULL	NULL	NULL	NULL	0.080322	1353.85	NULL	1181.43	1445.7	1136.14	1408.48	1500.37	1366.38	1319.06	1397.78	1338.45	1463.63	1370.69	1219.31	1452.56
PR_75319		NULL	NULL	NULL	NULL	NULL	NULL	0.0907998	1347.29	NULL	1253.3	1406.4	1187.37	1333.64	1324.68	1298.78	1438.66	1289.96	1530.49	1535.73	1499.24	1282.83	1133.64
PR_79676		NULL	GO:0003674_GO:0003676_GO:0003677_GO:0005488	NULL	NULL	NULL	NULL	0.0856111	1294.36	NULL	1436.52	1386.65	1178	1281.32	1114.87	1141.91	1308.48	1322.48	1343.08	1270.14	1497.21	1184.31	1361.64
PR_95340		NULL	NULL	NULL	NULL	NULL	NULL	0.101578	1168.72	NULL	1201.09	1049.29	1071.86	1229.4	1270.96	1221.32	1074.14	1173.35	1386.37	1260.29	1123.12	1230.02	902.151
PR_95586		NULL	NULL	NULL	NULL	NULL	NULL	0.0931679	1026.96	NULL	949.703	946.402	816.002	1048.77	1059.65	1063.48	1156.3	926.26	1030.94	1070.89	996.639	1178.96	1106.55
PR_80695	PREDICTED: similar to CG1109-PA, isoform A [Apis mellifera]	NULL	GO:0003674_GO:0003676_GO:0005488_GO:0008270_GO:0043167_GO:0043169_GO:0046872_GO:0046914	NULL	NULL	NULL	NULL	0.0970818	998.837	NULL	891.99	878.778	965.254	1009.2	1012.62	988.117	1114.82	1236.89	1015.96	919.29	1023.66	877.25	1051.06
PR_74163	beta-glucosidase [Pedobacter sp. BAL39]	NULL	GO:0003674_GO:0003824_GO:0004553_GO:0005975_GO:0008150_GO:0008152_GO:0016787_GO:0016798_GO:0044238	NULL	NULL	NULL	NULL	0.0971675	964.92	NULL	819.323	1001.29	1006.07	992.583	1087.39	1037.1	1004.29	990.327	895.034	981.125	891.987	1080.2	757.222
PR_85072		NULL	GO:0005575_GO:0005623_GO:0016020_GO:0044464	NULL	NULL	NULL	NULL	0.101642	925.494	NULL	1012.97	923.691	795.578	835.344	1024.31	946.96	825.394	1064.49	1093.63	889.128	901.298	903.327	815.306
PR_96943		NULL	GO:0003674_GO:0005488_GO:0008270_GO:0043167_GO:0043169_GO:0046872_GO:0046914	NULL	NULL	NULL	NULL	0.0782352	919.068	NULL	928.593	870.286	865.146	889.766	889.604	964.364	1100.04	957.819	973.049	964.075	887.654	856.661	800.825
PR_73402		NULL	NULL	NULL	NULL	NULL	NULL	0.090115	896.992	NULL	711.699	803.163	965.32	970.395	977.325	862.639	854.613	856.307	848.189	963.124	955.61	893.267	999.25
PR_39193	GTP-binding protein [Gluconacetobacter diazotrophicus PAl 5]	NULL	GO:0000166_GO:0003674_GO:0005488_GO:0005525_GO:0005575_GO:0005622_GO:0005623_GO:0007154_GO:0007165_GO:0007242_GO:0007264_GO:0008150_GO:0009987_GO:0017076_GO:0019001_GO:0032553_GO:0032555_GO:0032561_GO:0044464_GO:0050789_GO:0050794_GO:0065007	NULL	NULL	NULL	NULL	0.0738345	805.601	NULL	819.796	800.401	714.659	840.43	752.362	789.904	777.76	877.091	727.406	852.806	875.229	740.161	904.808
PR_85122	queuine tRNA-ribosyltransferase [Psychrobacter sp. PRwf-1]	NULL	GO:0000166_GO:0003674_GO:0003676_GO:0003824_GO:0003887_GO:0005488_GO:0006139_GO:0006396_GO:0006399_GO:0006400_GO:0008033_GO:0008150_GO:0008152_GO:0008479_GO:0008616_GO:0008617_GO:0008618_GO:0009058_GO:0009116_GO:0009119_GO:0009163_GO:0009451_GO:0009987_GO:0010467_GO:0016070_GO:0016740_GO:0016757_GO:0016763_GO:0016772_GO:0016779_GO:0034061_GO:0034404_GO:0034470_GO:0034654_GO:0034660_GO:0034960_GO:…	NULL	NULL	NULL	NULL	0.0937058	731.204	NULL	901.534	695.543	623.954	667.045	703.198	734.96	782.93	724.349	666.125	813.644	725.714	749.705	716.946
PR_84880		NULL	GO:0003674_GO:0005488_GO:0005509_GO:0005515_GO:0043167_GO:0043169_GO:0046872	NULL	NULL	NULL	NULL	0.0908818	722.942	NULL	725.659	810.955	748.472	837.287	765.549	684.055	729.542	786.781	651.785	688.411	725.989	606.09	637.668
PR_78529		NULL	NULL	NULL	NULL	NULL	NULL	0.0958247	620.299	NULL	735.775	704.745	652.868	608.684	575.505	656.567	641.945	630.18	627.88	601.37	509.392	571.083	547.892
PR_93568	PREDICTED: similar to N-acetylglucosamine-phosphate mutase [Ornithorhynchus anatinus]	NULL	GO:0003674_GO:0003824_GO:0005488_GO:0005975_GO:0008150_GO:0008152_GO:0008270_GO:0016853_GO:0016866_GO:0016868_GO:0043167_GO:0043169_GO:0044238_GO:0046872_GO:0046914	NULL	NULL	NULL	NULL	0.0950181	568.277	NULL	586.958	654.93	487.635	567.113	555.638	606.798	520.169	516.945	588.275	518.226	680.373	574.236	530.3
PR_85511		NULL	NULL	NULL	NULL	NULL	NULL	0.101444	562.629	NULL	593.413	647.278	601.982	494.708	622.03	498.707	517.165	605.061	516.912	453.769	566.551	605.043	591.553
PR_80193		NULL	GO:0003674_GO:0003676_GO:0003677_GO:0005488	NULL	NULL	NULL	NULL	0.0934341	530.302	NULL	518.908	584.502	594.061	523.125	579.365	525.944	550.624	547.529	504.545	491.611	579.452	487.036	407.227
PR_80787		NULL	NULL	NULL	NULL	NULL	NULL	0.0984018	438.353	NULL	413.675	503.932	407.693	488.894	438.284	394.955	416.87	520.868	445.223	415.697	408.096	374.072	470.322
PR_76229		NULL	NULL	NULL	NULL	NULL	NULL	0.102131	2253.08	NULL	2009.18	1800.86	2216.8	2464.67	2489.47	2091.48	2285.5	2444.9	2265.55	2558.87	2509.31	1940.84	2212.61
PR_75172		NULL	GO:0003674_GO:0005215_GO:0005216_GO:0005244_GO:0005253_GO:0005575_GO:0005622_GO:0005623_GO:0005737_GO:0005739_GO:0005740_GO:0005741_GO:0006810_GO:0006811_GO:0006820_GO:0008150_GO:0008308_GO:0008509_GO:0015075_GO:0015267_GO:0016020_GO:0019867_GO:0022803_GO:0022832_GO:0022836_GO:0022838_GO:0022857_GO:0022891_GO:0022892_GO:0031090_GO:0031966_GO:0031967_GO:0031968_GO:0031975_GO:0043226_GO:0043227_GO:…	NULL	NULL	NULL	NULL	0.102136	10378.2	NULL	11145.3	8619.02	9299.89	10915.8	9314.49	10523.9	11575.7	9307.85	11291.6	10229.6	10964.2	9439.08	12290.6
PR_71919	DnaJ protein, putative [Oryza sativa (japonica cultivar-group)]	NULL	GO:0003674_GO:0005488_GO:0005515_GO:0006457_GO:0008150_GO:0008152_GO:0009987_GO:0019538_GO:0031072_GO:0034960_GO:0043170_GO:0043283_GO:0044237_GO:0044238_GO:0044260_GO:0044267_GO:0051082	NULL	NULL	NULL	NULL	0.102204	11542.8	NULL	10561.7	12039.4	10773.3	9427.27	11218.1	11926.6	11976.9	11441.3	11017	11405.5	13795.3	10650.9	13823.1
PR_75161	predicted protein [Physcomitrella patens subsp. patens]	NULL	GO:0000166_GO:0003674_GO:0003676_GO:0003824_GO:0004386_GO:0005488_GO:0005524_GO:0008026_GO:0008270_GO:0016462_GO:0016787_GO:0016817_GO:0016818_GO:0016887_GO:0017076_GO:0017111_GO:0030554_GO:0032553_GO:0032555_GO:0032559_GO:0042623_GO:0043167_GO:0043169_GO:0046872_GO:0046914_GO:0070035	NULL	NULL	NULL	NULL	0.102247	3766.18	NULL	4122	4354.36	4096.53	3468.4	4030.65	4249.93	3806.27	3897.97	3707.78	3346.35	3529.57	3159.92	3190.65
PR_50465	predicted protein [Physcomitrella patens subsp. patens]	NULL	GO:0005575_GO:0005623_GO:0016020_GO:0016021_GO:0031224_GO:0044425_GO:0044464	NULL	NULL	NULL	NULL	0.102256	13426.7	NULL	13415.3	13272.8	13619.1	12378.7	13936.6	13493.4	13653.7	15357.5	14567.6	14137.3	9320.57	13203.1	14191.7
PR_71043	ubiquitin-conjugating enzyme type E2 [Aspergillus niger]	NULL	GO:0003674_GO:0003824_GO:0006464_GO:0008150_GO:0008152_GO:0009987_GO:0016874_GO:0016879_GO:0016881_GO:0019222_GO:0019538_GO:0019787_GO:0034960_GO:0043170_GO:0043283_GO:0043412_GO:0043687_GO:0044237_GO:0044238_GO:0044260_GO:0044267_GO:0050789_GO:0051246_GO:0060255_GO:0065007_GO:0080090	NULL	NULL	NULL	NULL	0.102268	21391.3	NULL	22330.7	19184.9	21769.3	23934.7	20898.4	20562.6	21046.6	18662.9	24647.5	17692	25358.4	21717	20282.4
PR_73030	Os11g0484000 [Oryza sativa (japonica cultivar-group)]	NULL	GO:0000096_GO:0003674_GO:0003824_GO:0005488_GO:0006082_GO:0006519_GO:0006520_GO:0006555_GO:0006790_GO:0006807_GO:0008150_GO:0008152_GO:0008967_GO:0009066_GO:0009308_GO:0009987_GO:0016787_GO:0016788_GO:0016791_GO:0019509_GO:0019752_GO:0034641_GO:0042578_GO:0043094_GO:0043102_GO:0043167_GO:0043874_GO:0044237_GO:0044238_GO:0046872	NULL	NULL	NULL	NULL	0.102284	3085.71	NULL	3556.5	3784.07	3145.03	2829.07	3128.53	3123.91	2980.58	2936.79	2592.18	2917.77	3111.01	2692.87	3315.93
PR_77533		NULL	GO:0003674_GO:0003676_GO:0003723_GO:0003743_GO:0005488_GO:0005575_GO:0005622_GO:0005623_GO:0005737_GO:0006412_GO:0006413_GO:0008135_GO:0008150_GO:0008152_GO:0009058_GO:0009059_GO:0009987_GO:0010467_GO:0019538_GO:0034645_GO:0034960_GO:0034961_GO:0043170_GO:0043283_GO:0043284_GO:0044237_GO:0044238_GO:0044249_GO:0044260_GO:0044267_GO:0044424_GO:0044464_GO:0045182	NULL	NULL	NULL	NULL	0.102292	5765.86	NULL	6604.17	6401.72	4765.8	5843.09	5777.56	4864.16	5882.59	5834.92	6008.37	5066.7	6730.66	5722.28	5454.18
PR_75490		NULL	NULL	NULL	NULL	NULL	NULL	0.102304	4091.78	NULL	3934.22	4251.84	4533.64	4552.4	3593.11	4006.57	3341.53	4208.58	4532.9	4746.61	4154.6	3635.9	3701.22
PR_79194	Ubiquitin carboxyl-terminal hydrolase 47 (Ubiquitin thioesterase 47) (Ubiquitin-specific-processing protease 47) (Deubiquitinating enzyme 47)	NULL	GO:0003674_GO:0003824_GO:0004221_GO:0006464_GO:0006508_GO:0006511_GO:0008150_GO:0008152_GO:0009056_GO:0009057_GO:0009987_GO:0016787_GO:0016788_GO:0016790_GO:0019538_GO:0019941_GO:0030163_GO:0034960_GO:0034962_GO:0043170_GO:0043283_GO:0043285_GO:0043412_GO:0043632_GO:0044237_GO:0044238_GO:0044248_GO:0044257_GO:0044260_GO:0044265_GO:0044267_GO:0051603	NULL	NULL	NULL	NULL	0.102376	11785.3	NULL	13373.5	12580.6	10812.3	12896.2	13775.8	11017.3	12412.6	13013.2	10995.1	10368	10283.2	10360.4	11320.6
PR_86490		TPSI	GO:0006139_GO:0006350_GO:0008150_GO:0008152_GO:0009058_GO:0009059_GO:0009987_GO:0010467_GO:0034645_GO:0034960_GO:0034961_GO:0043170_GO:0043283_GO:0043284_GO:0044237_GO:0044238_GO:0044249_GO:0044260	TPSI_5914	ISC1316	NULL	NULL	0.10242	1123.14	NULL	1054.24	1084.73	1001.49	1193.46	1142.97	1323.14	1296.37	1220.27	1114.13	1177.45	1065.15	896.635	1030.84
PR_79742	MGC80423 protein [Xenopus laevis]	NULL	GO:0003674_GO:0003824_GO:0004177_GO:0005488_GO:0008150_GO:0008233_GO:0008238_GO:0009987_GO:0016787_GO:0030145_GO:0043167_GO:0043169_GO:0046872_GO:0046914_GO:0070011	NULL	NULL	NULL	NULL	0.102423	11634.3	NULL	11187.4	10702	10770	11854.1	12383.6	12137.2	12785.7	10442.8	12213.4	11261.2	14329.1	9341.36	11837.9
PR_86731		NULL	GO:0006457_GO:0008150_GO:0008152_GO:0009987_GO:0019538_GO:0034960_GO:0043170_GO:0043283_GO:0044237_GO:0044238_GO:0044260_GO:0044267	NULL	NULL	NULL	NULL	0.102438	3903.9	NULL	4378.43	4036.13	3787.8	4574.84	2939.45	4338.03	3964.95	3771.43	4114.26	3608.1	3615.43	3827.81	3794.01
PR_78622		NULL	NULL	NULL	NULL	NULL	NULL	0.102466	3135.58	NULL	3177.82	3068.95	3661.15	3402.41	3024.55	3317.79	3011.55	2692.17	2774.71	2537.68	3131.83	3433.51	3528.41
PR_73911		TPSI	NULL	TPSI_4539	DDE_1	NULL	NULL	0.102485	7473.23	NULL	7767.11	8465.17	7114.97	7397.45	8104.39	8605.96	6700.3	7182.32	6961.58	6360.18	8051.17	8244.28	6197.05
PR_77510		NULL	NULL	NULL	NULL	NULL	NULL	0.10251	5808.49	NULL	5533.07	5385.05	6639.04	7014.41	5407.56	5650.01	6119.77	6010.81	5789.37	5323.01	4992.59	5121.47	6524.22
PR_76057	ATGSL10 (GLUCAN SYNTHASE-LIKE 10); 1,3-beta-glucan synthase [Arabidopsis thaliana]	NULL	GO:0000148_GO:0000271_GO:0003674_GO:0003824_GO:0003843_GO:0005575_GO:0005623_GO:0005886_GO:0005975_GO:0005976_GO:0006073_GO:0006074_GO:0006075_GO:0008150_GO:0008152_GO:0008194_GO:0009058_GO:0009059_GO:0009250_GO:0009987_GO:0016020_GO:0016051_GO:0016740_GO:0016757_GO:0016758_GO:0032991_GO:0033692_GO:0034637_GO:0034645_GO:0034960_GO:0034961_GO:0035251_GO:0043170_GO:0043234_GO:0043283_GO:0043284_GO:…	NULL	NULL	NULL	NULL	0.102554	25368.4	NULL	23143	24424.1	28549.7	31508.7	29268.7	24538.7	25582.8	24085.2	23899	24630.5	24604.3	22703.1	22851
PR_74866	tubular mastigoneme protein [Ochromonas danica]	NULL	GO:0003674_GO:0003824_GO:0004175_GO:0004190_GO:0006508_GO:0008150_GO:0008152_GO:0008233_GO:0009987_GO:0016787_GO:0019538_GO:0034960_GO:0043170_GO:0043283_GO:0044237_GO:0044238_GO:0044260_GO:0044267_GO:0070001_GO:0070011	NULL	NULL	NULL	NULL	0.102561	528.467	NULL	464.633	509.224	617.917	552.144	550.245	476.904	451.428	573.968	540.179	473.122	608.548	478.882	572.878
PR_77350	putative protein [Arabidopsis thaliana]	NULL	GO:0000148_GO:0000271_GO:0003674_GO:0003824_GO:0003843_GO:0005215_GO:0005575_GO:0005623_GO:0005886_GO:0005975_GO:0005976_GO:0006073_GO:0006074_GO:0006075_GO:0006810_GO:0008150_GO:0008152_GO:0008194_GO:0009058_GO:0009059_GO:0009250_GO:0009987_GO:0016020_GO:0016021_GO:0016051_GO:0016740_GO:0016757_GO:0016758_GO:0031224_GO:0032991_GO:0033692_GO:0034637_GO:0034645_GO:0034960_GO:0034961_GO:0035251_GO:…	NULL	NULL	NULL	NULL	0.102606	9008.34	NULL	10577.7	9501.64	8541.58	9725.18	9222.11	10045.2	9832.4	8238.19	9354.38	8902.46	7493.22	7607.26	8067.09
PR_74436	MMS19 protein [Homo sapiens]	NULL	NULL	NULL	NULL	NULL	NULL	0.102633	5200.55	NULL	4654.43	5714.28	4893.35	5706.2	6060.82	4961.86	4909.14	5121.65	4881.19	5475.27	4463.93	4635.26	6129.82
PR_74190	predicted protein [Monosiga brevicollis MX1]	NULL	GO:0000228_GO:0003674_GO:0003824_GO:0003896_GO:0003899_GO:0005575_GO:0005622_GO:0005623_GO:0005634_GO:0005657_GO:0005658_GO:0005694_GO:0006139_GO:0006259_GO:0006260_GO:0006261_GO:0006269_GO:0008150_GO:0008152_GO:0009058_GO:0009059_GO:0009987_GO:0016070_GO:0016740_GO:0016772_GO:0016779_GO:0030894_GO:0032774_GO:0032991_GO:0032993_GO:0034062_GO:0034645_GO:0034960_GO:0034961_GO:0043170_GO:0043226_GO:…	NULL	NULL	NULL	NULL	0.102647	2926.53	NULL	2642.2	2733.21	3052.98	2574.6	2873.62	3297.98	2761.35	3047.29	2957.53	2840.16	3592.52	2472.42	3198.99
PR_77545		NULL	GO:0003674_GO:0005215_GO:0005575_GO:0005623_GO:0006810_GO:0008150_GO:0016020_GO:0044464_GO:0051179_GO:0051234	NULL	NULL	NULL	NULL	0.1027	2101.86	NULL	2023.81	2399.84	2286.98	1870.31	1897.56	2232.53	1832.06	2441.36	2221.57	2307.38	1920.38	1808.21	2082.25
PR_40035	PheS phenylalanine-tRNA synthetase, probable (IC) [Ostreococcus tauri]	NULL	GO:0000049_GO:0000166_GO:0000287_GO:0003674_GO:0003676_GO:0003723_GO:0003824_GO:0004812_GO:0004826_GO:0005488_GO:0005524_GO:0005575_GO:0005622_GO:0005623_GO:0005737_GO:0006082_GO:0006139_GO:0006396_GO:0006399_GO:0006412_GO:0006418_GO:0006432_GO:0006519_GO:0006520_GO:0006807_GO:0008033_GO:0008150_GO:0008152_GO:0009058_GO:0009059_GO:0009308_GO:0009987_GO:0010467_GO:0016070_GO:0016874_GO:0016875_GO:…	NULL	NULL	NULL	NULL	0.102864	4660.92	NULL	5079.25	4909.39	4550.94	4446.38	4909.21	4175.39	4099.16	5574.03	4924.6	5242.38	4607.6	4205.81	3867.79
PR_72082	Serine/threonine-protein kinase Eg2-like (p46XlEg22)	NULL	GO:0000166_GO:0003674_GO:0003824_GO:0004672_GO:0004674_GO:0004713_GO:0005488_GO:0005524_GO:0006464_GO:0006468_GO:0006793_GO:0006796_GO:0008150_GO:0008152_GO:0009987_GO:0016301_GO:0016310_GO:0016740_GO:0016772_GO:0016773_GO:0017076_GO:0019538_GO:0030554_GO:0032553_GO:0032555_GO:0032559_GO:0034960_GO:0043170_GO:0043283_GO:0043412_GO:0043687_GO:0044237_GO:0044238_GO:0044260_GO:0044267	NULL	NULL	NULL	NULL	0.102886	1394.74	NULL	1394.53	1096.39	1309.17	1478.37	1499.21	1406.19	1272.71	1294.18	1262.83	1594.89	1489.96	1643.28	1389.94
PR_74923		NULL	NULL	NULL	NULL	NULL	NULL	0.102924	7699.49	NULL	7322.52	8485.61	8166.92	8076.09	6807.03	9173.73	7834.7	7005.53	7598.28	7230.09	7970.04	8393.33	6029.56
PR_85098		NULL	NULL	NULL	NULL	NULL	NULL	0.10295	27651.5	NULL	24269.9	21960.7	23784.7	28146.5	27843.3	29655.3	28768.3	28193.3	28824.5	27116.5	31144.9	32790.5	26970.6
PR_71027	predicted protein [Physcomitrella patens subsp. patens]	NULL	GO:0000166_GO:0000287_GO:0003674_GO:0003676_GO:0003723_GO:0003824_GO:0004812_GO:0004826_GO:0005488_GO:0005524_GO:0005575_GO:0005622_GO:0005623_GO:0005737_GO:0006082_GO:0006139_GO:0006399_GO:0006412_GO:0006418_GO:0006432_GO:0006519_GO:0006520_GO:0006807_GO:0008150_GO:0008152_GO:0009058_GO:0009059_GO:0009308_GO:0009987_GO:0010467_GO:0016070_GO:0016874_GO:0016875_GO:0016876_GO:0017076_GO:0019538_GO:…	NULL	NULL	NULL	NULL	0.102964	12916.7	NULL	13607.1	14278.5	15145.7	11971.3	11508.6	10613.4	12695.5	13599.8	14355.4	11732.1	12378.3	11748.1	14283.8
PR_71265	iodothyronine 5' monodeiodinase	NULL	GO:0003674_GO:0003824_GO:0005575_GO:0005622_GO:0005623_GO:0005737_GO:0005783_GO:0008150_GO:0009987_GO:0016853_GO:0019725_GO:0042592_GO:0043226_GO:0043227_GO:0043229_GO:0043231_GO:0044424_GO:0044444_GO:0044464_GO:0045454_GO:0050789_GO:0050794_GO:0065007_GO:0065008	NULL	NULL	NULL	NULL	0.102995	14321.3	NULL	12593.6	12632.9	13195.7	13606.2	12015.3	14467.8	14914.2	16493.6	16202.3	16343.3	14265.7	13648.8	15797.4
PR_77621		NULL	GO:0003674_GO:0005488_GO:0005515_GO:0006457_GO:0008150_GO:0008152_GO:0009987_GO:0019538_GO:0031072_GO:0034960_GO:0043170_GO:0043283_GO:0044237_GO:0044238_GO:0044260_GO:0044267_GO:0051082	NULL	NULL	NULL	NULL	0.103004	6943.52	NULL	6909.74	5701.98	7422.69	7458.37	8137.33	6962.3	6312.94	6956.61	7612.43	6730.09	5951.08	6253.09	7857.14
PR_94513		NULL	NULL	NULL	NULL	NULL	NULL	0.103069	3444.61	NULL	3530.36	3845.63	3383.49	3171.49	3590.23	3968.04	3027.22	3083.56	3113.91	3435.32	4187.66	3346.45	3096.54
PR_82774		NULL	NULL	NULL	NULL	NULL	NULL	0.103131	9223.36	NULL	9145.28	8675.68	9902.03	10982.8	9993.17	9203.43	10004.7	10085.9	8935.87	9374.41	7410.83	8009.04	8180.54
PR_75213		NULL	NULL	NULL	NULL	NULL	NULL	0.103223	5338.62	NULL	5328.78	5311.86	4761.06	5338.8	4810.41	5966.88	4820.92	4888.38	5824.16	5718.97	5357.27	6614.46	4660.06
PR_77561		NULL	NULL	NULL	NULL	NULL	NULL	0.10333	5223.08	NULL	5458.33	5887.76	5025.46	5078.65	4812.83	5603.33	4568.05	4482.41	5003.11	4779.94	6283.6	5937.28	4979.24
PR_72228	cAMP-dependent protein kinase [Karlodinium micrum]	NULL	GO:0000166_GO:0003674_GO:0003824_GO:0004672_GO:0004674_GO:0005488_GO:0005524_GO:0006464_GO:0006468_GO:0006793_GO:0006796_GO:0008150_GO:0008152_GO:0009987_GO:0016301_GO:0016310_GO:0016740_GO:0016772_GO:0016773_GO:0017076_GO:0019538_GO:0030554_GO:0032553_GO:0032555_GO:0032559_GO:0034960_GO:0043170_GO:0043283_GO:0043412_GO:0043687_GO:0044237_GO:0044238_GO:0044260_GO:0044267	NULL	NULL	NULL	NULL	0.103512	3298.59	NULL	2637.47	2907.35	3198.5	3381.83	3555.22	3044.74	3604.98	3326.7	3393.11	3433.23	3191.6	3124.3	4082.58
PR_73844		NULL	NULL	NULL	NULL	NULL	NULL	0.103587	2755.2	NULL	3157.39	2424.51	2548.78	3297.36	3043.78	2634.61	2602.61	2757.46	2577.71	2382.05	2715.1	3106.49	2569.75
PR_86329	protein phosphatase 2C, putative / PP2C, putative [Arabidopsis thaliana]	NULL	GO:0003674_GO:0003824_GO:0004721_GO:0004722_GO:0005575_GO:0005623_GO:0006464_GO:0006470_GO:0006793_GO:0006796_GO:0008150_GO:0008152_GO:0008287_GO:0009987_GO:0016311_GO:0016787_GO:0016788_GO:0016791_GO:0019538_GO:0032991_GO:0034960_GO:0042578_GO:0043170_GO:0043234_GO:0043283_GO:0043412_GO:0043687_GO:0044237_GO:0044238_GO:0044260_GO:0044267_GO:0044464	NULL	NULL	NULL	NULL	0.103642	6712.62	NULL	5504.36	6275.4	6274.44	5647.33	6208.2	7307.87	6871.15	6805.69	7249.59	7679.12	6565.07	7871.11	7004.71
PR_94872		NULL	NULL	NULL	NULL	NULL	NULL	0.103682	25628.3	NULL	25153.5	21265.7	24774.6	28211.7	28272.8	28802.9	30854.2	24733.2	25148	21506.9	24516.5	25516.2	24411.7
PR_96948		NULL	NULL	NULL	NULL	NULL	NULL	0.103729	2847.68	NULL	3030.36	3353.33	3224.4	3245.28	2876.19	2922.71	2857.16	2583.33	2664.4	2847.66	2496.59	2530.64	2387.82
PR_76533	predicted protein [Physcomitrella patens subsp. patens]	NULL	GO:0003674_GO:0003712_GO:0003713_GO:0005488_GO:0005515_GO:0005575_GO:0005622_GO:0005623_GO:0005634_GO:0008134_GO:0008150_GO:0009889_GO:0009891_GO:0009893_GO:0010468_GO:0010556_GO:0010557_GO:0010604_GO:0010628_GO:0016563_GO:0019219_GO:0019222_GO:0030528_GO:0031323_GO:0031325_GO:0031326_GO:0031328_GO:0043226_GO:0043227_GO:0043229_GO:0043231_GO:0044424_GO:0044464_GO:0045449_GO:0045935_GO:0045941_GO:…	NULL	NULL	NULL	NULL	0.103752	1884.02	NULL	1977.21	1696.54	1645.91	1528.62	1822.31	1975.37	1802.2	1986.56	2065.79	1947.7	2324.78	1922.71	1796.55
PR_82318		NULL	NULL	NULL	NULL	NULL	NULL	0.10378	3960.83	NULL	3862.83	3685	4291.99	4335.16	4999.92	3879.61	3737.45	4020.43	3675.81	4172.72	3887.49	3236.28	3706.14
PR_51583	predicted protein [Physcomitrella patens subsp. patens]	NULL	NULL	NULL	NULL	NULL	NULL	0.103829	4635.95	NULL	3948.89	4679.06	4917.28	3964.72	3979.46	4461.92	4300.36	5225.36	5013.88	4831.36	5555.21	4859.4	4530.41
PR_79943		NULL	GO:0003674_GO:0003676_GO:0003824_GO:0004518_GO:0004527_GO:0005488_GO:0005575_GO:0005622_GO:0005623_GO:0008270_GO:0016787_GO:0016788_GO:0043167_GO:0043169_GO:0044464_GO:0046872_GO:0046914	NULL	NULL	NULL	NULL	0.103839	6400.53	NULL	7018.98	6647.49	6331.43	6902.93	5626.87	6296.78	6152.19	5669.61	5140.77	6511.97	7888.08	6495.5	6524.32
PR_81240		NULL	NULL	NULL	NULL	NULL	NULL	0.103863	4460.48	NULL	4612.31	4027.12	4020.36	4041.46	4333.77	4579.71	3783.09	4879.79	4745.18	4217.29	5585.73	4345.65	4814.77
PR_78931		NULL	NULL	NULL	NULL	NULL	NULL	0.103899	4816.77	NULL	4880.69	5665.26	5150.69	5214.15	4162.83	4535.72	4347.91	5029.78	5182.5	4499.57	3976.68	4489.49	5482.7
PR_81618		NULL	NULL	NULL	NULL	NULL	NULL	0.103925	9561.36	NULL	10370.8	10103.9	9316.32	10058.2	8259.28	8845.68	9204.93	8963.8	9409.8	8446.08	11659	8589.75	11070.3
PR_73956		NULL	NULL	NULL	NULL	NULL	NULL	0.103953	9129.82	NULL	9383.82	10349.9	8896.89	8522.17	8309.98	9547.16	7134.12	8265.44	9419.52	11128.6	9389.43	9110.46	9230.21
PR_75402	predicted protein [Physcomitrella patens subsp. patens]	NULL	GO:0000166_GO:0003674_GO:0003824_GO:0004672_GO:0004674_GO:0004713_GO:0005488_GO:0005524_GO:0006464_GO:0006468_GO:0006793_GO:0006796_GO:0008150_GO:0008152_GO:0009987_GO:0016301_GO:0016310_GO:0016740_GO:0016772_GO:0016773_GO:0017076_GO:0019538_GO:0030554_GO:0032553_GO:0032555_GO:0032559_GO:0034960_GO:0043170_GO:0043283_GO:0043412_GO:0043687_GO:0044237_GO:0044238_GO:0044260_GO:0044267	NULL	NULL	NULL	NULL	0.103991	3746.65	NULL	3307.83	3676.07	3541.02	3560.89	4678.97	3675.58	4157.45	3955.8	4043.75	3142.02	3863.17	3366.06	3737.85
PR_71095	predicted protein [Physcomitrella patens subsp. patens]	NULL	GO:0003674_GO:0003735_GO:0005198_GO:0005575_GO:0005622_GO:0005623_GO:0005737_GO:0005840_GO:0006412_GO:0008150_GO:0008152_GO:0009058_GO:0009059_GO:0009987_GO:0010467_GO:0019538_GO:0030529_GO:0032991_GO:0034645_GO:0034960_GO:0034961_GO:0043170_GO:0043226_GO:0043228_GO:0043229_GO:0043232_GO:0043283_GO:0043284_GO:0044237_GO:0044238_GO:0044249_GO:0044260_GO:0044267_GO:0044424_GO:0044444_GO:0044464	NULL	NULL	NULL	NULL	0.104027	36292.2	NULL	30964.5	35638.7	31647.4	31916.9	37091.2	31800.5	37041	40314.3	44117	36480.4	36893.6	40064.6	37827.8
PR_77794		NULL	GO:0003674_GO:0005488_GO:0005515_GO:0006139_GO:0008150_GO:0008152_GO:0009987_GO:0016070_GO:0034960_GO:0043170_GO:0043283_GO:0044237_GO:0044238_GO:0044260	NULL	NULL	NULL	NULL	0.104032	9064.9	NULL	9590.17	10669.9	10352.8	9316.94	9049.86	8714.43	10394.8	8641.78	8057.15	7593.21	9135.06	8394.11	7933.48
PR_79822		NULL	NULL	NULL	NULL	NULL	NULL	0.104038	5717.5	NULL	6712.36	6034.39	5830.18	6296.62	5039.35	6399.63	5136.66	5248.43	5450.82	6108.98	5187.08	4727.04	6155.99
PR_73421		NULL	GO:0000166_GO:0003674_GO:0003824_GO:0004553_GO:0004672_GO:0004674_GO:0004713_GO:0005488_GO:0005515_GO:0005524_GO:0005975_GO:0006464_GO:0006468_GO:0006793_GO:0006796_GO:0008150_GO:0008152_GO:0009987_GO:0016301_GO:0016310_GO:0016740_GO:0016772_GO:0016773_GO:0016787_GO:0016798_GO:0017076_GO:0019538_GO:0030554_GO:0032553_GO:0032555_GO:0032559_GO:0034960_GO:0043170_GO:0043283_GO:0043412_GO:0043687_GO:…	NULL	NULL	NULL	NULL	0.104067	11807.5	NULL	10133.7	9852.28	11437.9	11656.9	11204.6	11004	11364.8	12110.9	14440.1	13228.7	12038.8	13392.8	11632.2
PR_80527		NULL	GO:0003674_GO:0003676_GO:0003677_GO:0003824_GO:0004407_GO:0005488_GO:0006342_GO:0006355_GO:0006464_GO:0006476_GO:0008150_GO:0008152_GO:0008270_GO:0009889_GO:0009890_GO:0009892_GO:0009987_GO:0010468_GO:0010556_GO:0010558_GO:0010605_GO:0010629_GO:0016458_GO:0016481_GO:0016787_GO:0016810_GO:0016811_GO:0017136_GO:0019213_GO:0019219_GO:0019222_GO:0019538_GO:0031323_GO:0031324_GO:0031326_GO:0031327_GO:…	NULL	NULL	NULL	NULL	0.104081	3030.77	NULL	3670.62	2839.53	2709.79	3105.41	2507.92	3337.69	2549.21	2936.22	3125.86	3080.27	3363.2	3120.51	3053.73
PR_77709		NULL	NULL	NULL	NULL	NULL	NULL	0.104096	7289.86	NULL	7155.73	6842.07	7406.08	8144.6	7809.7	7252.8	7963.11	8099.68	7252.78	7084.37	5407.88	6299.83	8049.51
PR_96848		NULL	GO:0005575_GO:0005623_GO:0016020_GO:0016021_GO:0031224_GO:0044425_GO:0044464	NULL	NULL	NULL	NULL	0.104184	11105.4	NULL	11233.4	12383.4	11158.4	11279.7	10490.8	11410.3	9016.1	12841	12657	11735.4	10706.6	8980.81	10477.7
PR_80084	mitochondrial processing peptidase alpha subunit homolog [Toxoplasma gondii]	NULL	GO:0003674_GO:0003824_GO:0004175_GO:0004222_GO:0005488_GO:0006508_GO:0008150_GO:0008152_GO:0008233_GO:0008237_GO:0008270_GO:0009987_GO:0016787_GO:0019538_GO:0034960_GO:0043167_GO:0043169_GO:0043170_GO:0043283_GO:0044237_GO:0044238_GO:0044260_GO:0044267_GO:0046872_GO:0046914_GO:0070011	NULL	NULL	NULL	NULL	0.104254	3261.74	NULL	3110.34	3296.38	2929.45	2828.49	3113.23	2841.6	3079.5	3609.79	3491.69	4003	3324.88	3078.63	3695.57
PR_87040	OSJNBb0034I13.15 [Oryza sativa (japonica cultivar-group)]	NULL	GO:0003674_GO:0003676_GO:0003824_GO:0004497_GO:0004518_GO:0004527_GO:0005488_GO:0005506_GO:0005575_GO:0005622_GO:0005623_GO:0006139_GO:0008150_GO:0008152_GO:0008408_GO:0009055_GO:0009987_GO:0016491_GO:0016787_GO:0016788_GO:0020037_GO:0043167_GO:0043169_GO:0044237_GO:0044238_GO:0044464_GO:0046872_GO:0046906_GO:0046914	NULL	NULL	NULL	NULL	0.104291	1893.03	NULL	1732.54	1862.17	1762.04	2032.03	1945.6	1938.26	2467.66	1877.64	1798.37	1842.82	1590.19	1831.37	1928.66
PR_74564	Ribosomal protein L18, component of cytosolic 80S ribosome and 60S large subunit [Ostreococcus lucimarinus CCE9901]	NULL	GO:0003674_GO:0003735_GO:0005198_GO:0005575_GO:0005622_GO:0005623_GO:0005737_GO:0005840_GO:0006412_GO:0008150_GO:0008152_GO:0009058_GO:0009059_GO:0009987_GO:0010467_GO:0019538_GO:0030529_GO:0032991_GO:0034645_GO:0034960_GO:0034961_GO:0043170_GO:0043226_GO:0043228_GO:0043229_GO:0043232_GO:0043283_GO:0043284_GO:0044237_GO:0044238_GO:0044249_GO:0044260_GO:0044267_GO:0044424_GO:0044444_GO:0044464	NULL	NULL	NULL	NULL	0.104348	24709.2	NULL	23600.3	25310.3	22951.9	27208.4	22322	21139.8	22936.1	24098.2	24659.9	26324.9	21965.8	28960.5	29741.9
PR_72466		NULL	GO:0003674_GO:0003824_GO:0005575_GO:0005622_GO:0005623_GO:0006464_GO:0008150_GO:0008152_GO:0009987_GO:0016874_GO:0016879_GO:0016881_GO:0019538_GO:0034960_GO:0043170_GO:0043283_GO:0043412_GO:0044237_GO:0044238_GO:0044260_GO:0044267_GO:0044464	NULL	NULL	NULL	NULL	0.104351	6464.04	NULL	7462.85	6455.52	6603.55	7596.78	6977.99	6200.69	6211.38	5356.24	6526.56	5435.51	5936.17	7178.45	6090.83
PR_73954		NULL	GO:0003674_GO:0005488_GO:0005575_GO:0005623_GO:0007154_GO:0007165_GO:0007166_GO:0007186_GO:0008150_GO:0009987_GO:0016020_GO:0016021_GO:0031224_GO:0044425_GO:0044464_GO:0050789_GO:0050794_GO:0065007	NULL	NULL	NULL	NULL	0.104353	5434.18	NULL	5182.08	6163.44	5560.09	5256.95	4830.97	4844.74	4890.88	5082.44	5858.12	5229.56	6024.79	6718.7	5001.55
PR_74484	putative phosphatidylinositol phosphate kinase [Dictyostelium discoideum AX4]	NULL	GO:0001727_GO:0003674_GO:0003824_GO:0004428_GO:0004871_GO:0004872_GO:0004888_GO:0004930_GO:0005575_GO:0005576_GO:0005623_GO:0006629_GO:0006643_GO:0006644_GO:0006650_GO:0007154_GO:0007165_GO:0007166_GO:0007186_GO:0008150_GO:0008152_GO:0009987_GO:0016020_GO:0016301_GO:0016307_GO:0016740_GO:0016772_GO:0016773_GO:0030384_GO:0044237_GO:0044238_GO:0044255_GO:0044464_GO:0046488_GO:0050789_GO:0050794_GO:…	NULL	NULL	NULL	NULL	0.104375	9824.01	NULL	11406.9	11206.2	10802.3	10800.4	8976.4	8711.29	10069.1	9663.38	9390.58	9887.85	7592.89	9477.46	9727.31
PR_79702	EF hand family protein [Tetrahymena thermophila SB210]	NULL	GO:0003674_GO:0005488_GO:0005509_GO:0005575_GO:0005623_GO:0006766_GO:0006767_GO:0006771_GO:0008150_GO:0008152_GO:0009058_GO:0009110_GO:0009231_GO:0009349_GO:0009987_GO:0032991_GO:0042364_GO:0042726_GO:0042727_GO:0043167_GO:0043169_GO:0043234_GO:0044237_GO:0044249_GO:0044464_GO:0046872	NULL	NULL	NULL	NULL	0.104422	9361.51	NULL	9749.26	8407.08	8401.6	10522	10611.9	8670.42	10607.8	9924.22	9212.76	10245	8022.23	7765.66	9559.68
PR_75922		NULL	GO:0003674_GO:0003676_GO:0005488	NULL	NULL	NULL	NULL	0.104498	6638.25	NULL	6314.19	5987.61	5857	6734.74	6764.63	6600.16	6224.02	6605.49	6542.34	6335.98	8825.23	6690.91	6815.02
PR_77078		NULL	GO:0000059_GO:0003674_GO:0005215_GO:0005575_GO:0005622_GO:0005623_GO:0005634_GO:0005635_GO:0005643_GO:0005737_GO:0006461_GO:0006605_GO:0006606_GO:0006810_GO:0006886_GO:0006913_GO:0008104_GO:0008150_GO:0008565_GO:0009987_GO:0010926_GO:0012505_GO:0015031_GO:0016020_GO:0016021_GO:0016043_GO:0017038_GO:0022607_GO:0022892_GO:0031224_GO:0031967_GO:0031975_GO:0032991_GO:0033036_GO:0033365_GO:0034504_GO:…	NULL	NULL	NULL	NULL	0.104551	7096.24	NULL	7296.4	7126.54	7262.8	7383.31	6288.02	6391.86	7106.89	7307.55	7884.29	5503.79	8650.08	7363.18	6686.36
PR_77398	predicted protein [Chlamydomonas reinhardtii]	NULL	NULL	NULL	NULL	NULL	NULL	0.104689	4855.16	NULL	5177.34	5419.04	5477.06	5864.38	4213.94	4854.84	4485.58	4641.67	4243	4600.3	4632.67	4290.81	5216.39
PR_77502	WD repeat domain phosphoinositide-interacting protein 2 [Dictyostelium discoideum AX4]	NULL	NULL	NULL	NULL	NULL	NULL	0.104705	4427.89	NULL	4181.05	4787.77	5497.08	4341.52	4448.37	4298.35	3695.78	3925.54	4901.97	4848.63	4387.4	3951	4298.16
PR_71538	putative RNA helicase [Oryza sativa Japonica Group]	NULL	GO:0000166_GO:0003674_GO:0003676_GO:0003723_GO:0003824_GO:0004386_GO:0005488_GO:0005524_GO:0008026_GO:0016462_GO:0016787_GO:0016817_GO:0016818_GO:0016887_GO:0017076_GO:0017111_GO:0030554_GO:0032553_GO:0032555_GO:0032559_GO:0042623_GO:0070035	NULL	NULL	NULL	NULL	0.104712	5768.65	NULL	5221.92	5837.53	6761.69	7022.52	6369.34	4927.84	5597.78	5077.32	5908.19	5262.28	5651.7	5684.19	5670.12
PR_73589	MCM family protein [Dictyostelium discoideum AX4]	NULL	GO:0000166_GO:0003674_GO:0003676_GO:0003677_GO:0003824_GO:0005488_GO:0005524_GO:0006139_GO:0006259_GO:0006260_GO:0008150_GO:0008152_GO:0009058_GO:0009059_GO:0009987_GO:0016462_GO:0016787_GO:0016817_GO:0016818_GO:0017076_GO:0017111_GO:0030554_GO:0032553_GO:0032555_GO:0032559_GO:0034645_GO:0034960_GO:0034961_GO:0043170_GO:0043283_GO:0043284_GO:0044237_GO:0044238_GO:0044249_GO:0044260	NULL	NULL	NULL	NULL	0.104736	1937.12	NULL	1694.78	2240.1	2152.41	1973.92	2022.93	2143.92	1977.45	1776.83	1477.58	1969.82	1860.09	2089.67	1803
PR_72669		NULL	GO:0003674_GO:0003676_GO:0003677_GO:0005488_GO:0005575_GO:0005623_GO:0016020_GO:0044464	NULL	NULL	NULL	NULL	0.104781	2545.48	NULL	2544.13	2425.55	2468.7	2604.44	2724.77	2764.06	2145.27	2736.99	2832.43	2398.27	2917.25	2599.63	1929.75
PR_71876	PREDICTED: similar to ferrochelatase [Ornithorhynchus anatinus]	NULL	GO:0003674_GO:0003824_GO:0004325_GO:0006778_GO:0006779_GO:0006783_GO:0008150_GO:0008152_GO:0009058_GO:0009987_GO:0016829_GO:0033013_GO:0033014_GO:0042168_GO:0042440_GO:0044237_GO:0044249_GO:0046148_GO:0046483_GO:0051186_GO:0051188	NULL	NULL	NULL	NULL	0.104785	2863.27	NULL	2922.72	2844.44	3449.32	3228.69	3076.87	2954.36	2466.42	2612.76	2631	3072.97	2996.35	2556.95	2409.72
PR_83740		NULL	GO:0005575_GO:0005623_GO:0006605_GO:0006810_GO:0006886_GO:0008104_GO:0008150_GO:0009987_GO:0015031_GO:0016020_GO:0033036_GO:0034613_GO:0044464_GO:0045184_GO:0046907_GO:0051179_GO:0051234_GO:0051641_GO:0051649	NULL	NULL	NULL	NULL	0.104797	2177.74	NULL	2095.96	2604.07	2564.12	2154.51	2271.54	2216.1	2036.84	2349.89	2023.32	1995.05	1709.05	2149.43	2140.7
PR_83710		NULL	GO:0003674_GO:0005488_GO:0005509_GO:0008104_GO:0008150_GO:0033036_GO:0043167_GO:0043169_GO:0046872_GO:0051179	NULL	NULL	NULL	NULL	0.104812	16688.6	NULL	14613.4	16826.2	16202.1	17094.1	17635.7	15710.4	17274.7	17113.4	16323.5	17343.5	12897.5	17031.6	20886.1
PR_80943		NULL	NULL	NULL	NULL	NULL	NULL	0.104894	12518.2	NULL	13460.5	12769.1	14477.2	14509.4	10496.8	10539.9	11822.6	12704.8	13333.7	12325.2	10511.7	13151	12635.6
PR_74151	predicted protein [Physcomitrella patens subsp. patens]	NULL	GO:0003674_GO:0003824_GO:0005083_GO:0005096_GO:0005097_GO:0005099_GO:0005488_GO:0005575_GO:0005622_GO:0005623_GO:0006508_GO:0008047_GO:0008150_GO:0008152_GO:0008233_GO:0008237_GO:0008270_GO:0009966_GO:0009987_GO:0010646_GO:0016787_GO:0019538_GO:0030234_GO:0030695_GO:0032313_GO:0032318_GO:0032483_GO:0034960_GO:0043087_GO:0043167_GO:0043169_GO:0043170_GO:0043283_GO:0044237_GO:0044238_GO:0044260_GO:…	NULL	NULL	NULL	NULL	0.104898	7398.52	NULL	6926.57	7199.43	6864.7	6661.6	8138.1	8468.15	8343.07	7477.53	7568.01	8008.89	7994.12	6907.9	5622.73
PR_73427	mitochondrial 3-hydroxyisobutyryl-CoA hydrolase, putative [Aspergillus clavatus NRRL 1]	NULL	GO:0003674_GO:0003824_GO:0008150_GO:0008152	NULL	NULL	NULL	NULL	0.104913	11217.9	NULL	10333.5	12063.5	11446	8761.09	10855.9	11797.5	9801.06	12663.9	12760	12795	10282.3	10910.2	11362.9
PR_94686	ATSAC1 (SUPPRESSOR OF ACTIN 1); phosphoinositide 5-phosphatase [Arabidopsis thaliana]	NULL	NULL	NULL	NULL	NULL	NULL	0.104987	5821.34	NULL	5457.47	6889.08	6407.66	5283.76	5912.82	6170.05	5616.61	6592.54	6184.07	5454.92	4472.03	5531.88	5704.49
PR_77299	glycosyl hydrolase [Aspergillus fumigatus Af293]	NULL	NULL	NULL	NULL	NULL	NULL	0.105007	4127.52	NULL	3885.4	4018.97	3520.08	3579.1	4664.2	4208.69	5059.49	4464.3	4211.44	4135.65	3971.51	3554.79	4384.14
PR_72342	SEC13 protein [Homo sapiens]	NULL	NULL	NULL	NULL	NULL	NULL	0.105011	5222.09	NULL	4334.86	5462.37	4789.68	4007.23	5302.04	5553.41	4990.86	5670.95	5224.38	5475.49	5475.55	5458.39	6141.96
PR_52278	translation initiation factor eIF-2B beta subunit [Dictyostelium discoideum AX4]	NULL	GO:0008150_GO:0008152_GO:0009987_GO:0044237	NULL	NULL	NULL	NULL	0.105084	4620.16	NULL	4348.59	3938.72	4182.28	4654.98	4165.47	4452.44	4773.25	4919.89	5010.58	4336.42	5819.85	5109.8	4349.75
PR_74441		NULL	NULL	NULL	NULL	NULL	NULL	0.105087	10762.2	NULL	9590.63	12554.7	11835.2	11639.5	9310.44	11464.7	11976.6	10674	10446	8564.42	10941.7	11121.8	9789.41
PR_78457	histone deacetylase family protein [Rhodobacterales bacterium HTCC2150]	NULL	GO:0003674_GO:0003676_GO:0003677_GO:0003700_GO:0005488_GO:0005515_GO:0006355_GO:0008150_GO:0008270_GO:0009889_GO:0010468_GO:0010556_GO:0019219_GO:0019222_GO:0030528_GO:0031323_GO:0031326_GO:0043167_GO:0043169_GO:0045449_GO:0046872_GO:0046914_GO:0050789_GO:0050794_GO:0051252_GO:0060255_GO:0065007_GO:0080090	NULL	NULL	NULL	NULL	0.105103	1486.27	NULL	1478.46	1144.37	1471.92	1480.21	1783.01	1545.78	1472.31	1518.01	1437.72	1422.61	1666.59	1268.98	1631.48
PR_75566		TPSI	GO:0003674_GO:0003676_GO:0005488_GO:0005575_GO:0005622_GO:0005623_GO:0005634_GO:0043226_GO:0043227_GO:0043229_GO:0043231_GO:0044424_GO:0044464	TPSI_0625	DDE_1	NULL	NULL	0.105121	2167	NULL	2275.43	2320.67	2001.92	2038.67	2206.31	2339.61	1835.08	2312.89	2366.3	2651.32	1999.19	1908.16	1915.48
PR_93292		NULL	NULL	NULL	NULL	NULL	NULL	0.105135	3969.41	NULL	3376.07	4144.88	4050.44	3232.72	3616.39	3905.97	3509.16	4457.94	4240.05	4592.31	4139.51	4471.26	3865.58
PR_72535	PREDICTED: similar to Peroxiredoxin 2 (Thioredoxin peroxidase 1) (Thioredoxin-dependent peroxide reductase 1) (Thiol-specific antioxidant protein) (TSA) (PRP) (Natural killer cell enhancing factor B) (NKEF-B) isoform 1 [Canis familiaris]	NULL	GO:0003674_GO:0003824_GO:0016209_GO:0016491	NULL	NULL	NULL	NULL	0.105147	20841.8	NULL	17047.9	21548.7	20164.4	18232.6	21824.5	22285.5	21790.3	18735.3	20164.2	19657.5	24804	24559.1	20130.1
PR_75903		NULL	GO:0000166_GO:0003674_GO:0003824_GO:0004672_GO:0004674_GO:0004713_GO:0005488_GO:0005524_GO:0006464_GO:0006468_GO:0006793_GO:0006796_GO:0008150_GO:0008152_GO:0009987_GO:0016301_GO:0016310_GO:0016740_GO:0016772_GO:0016773_GO:0017076_GO:0019538_GO:0030554_GO:0032553_GO:0032555_GO:0032559_GO:0034960_GO:0043170_GO:0043283_GO:0043412_GO:0043687_GO:0044237_GO:0044238_GO:0044260_GO:0044267	NULL	NULL	NULL	NULL	0.105287	5002.86	NULL	4189.56	4765.1	5342.9	6130.17	5537.97	4785.56	5137.42	4813.97	4729.11	5172.94	4704.03	4199.6	5528.81
PR_77535		NULL	GO:0001727_GO:0003674_GO:0003824_GO:0004428_GO:0006629_GO:0006643_GO:0006644_GO:0006650_GO:0008150_GO:0008152_GO:0009987_GO:0016301_GO:0016307_GO:0016740_GO:0016772_GO:0016773_GO:0030384_GO:0044237_GO:0044238_GO:0044255_GO:0046488	NULL	NULL	NULL	NULL	0.105293	6831.66	NULL	5917.03	6656.81	7875.1	6805	7580.48	7234.1	7364.64	6648.41	6952.3	7744.48	6051.24	5335.5	6646.53
PR_85240		NULL	NULL	NULL	NULL	NULL	NULL	0.105379	9644.87	NULL	8884.14	11670.5	11048.2	11018.6	8431.94	9547.69	9506.54	9440.44	9583.98	8544.45	8723.93	8704.25	10278.8
PR_77196		NULL	GO:0003674_GO:0003824_GO:0004175_GO:0004190_GO:0005575_GO:0005623_GO:0008233_GO:0016020_GO:0016021_GO:0016787_GO:0031224_GO:0044425_GO:0044464_GO:0070001_GO:0070011	NULL	NULL	NULL	NULL	0.105392	10220.8	NULL	9465	11571.9	12107.8	11009	9343.43	9618.68	9285.53	10140.6	9375.74	10796.1	8495.31	9901.39	11759.6
PR_82350		NULL	GO:0003674_GO:0005096_GO:0005215_GO:0005575_GO:0005622_GO:0005623_GO:0006810_GO:0008047_GO:0008150_GO:0009966_GO:0010646_GO:0016020_GO:0030234_GO:0030695_GO:0044464_GO:0050789_GO:0050794_GO:0051056_GO:0051179_GO:0051234_GO:0060589_GO:0065007	NULL	NULL	NULL	NULL	0.105437	13383.8	NULL	12861.8	12713.2	15656.2	14487.1	14452.7	13826.3	12183.3	15172.8	14476.9	11946.8	11810	13661.8	10740.1
PR_71494	RuvB-like 2 [Xenopus tropicalis]	NULL	GO:0000166_GO:0003674_GO:0003678_GO:0003824_GO:0004386_GO:0005488_GO:0005524_GO:0005575_GO:0005622_GO:0005623_GO:0005634_GO:0016462_GO:0016787_GO:0016817_GO:0016818_GO:0017076_GO:0017111_GO:0030554_GO:0032553_GO:0032555_GO:0032559_GO:0043226_GO:0043227_GO:0043229_GO:0043231_GO:0044424_GO:0044464	NULL	NULL	NULL	NULL	0.10548	8595.47	NULL	7284.78	8444.52	9073.32	8387.61	7120.85	8988.87	7789.85	8315.15	7925.49	9528.02	8958.44	9497.56	10426.6
PR_74943		NULL	GO:0003674_GO:0005488_GO:0005509_GO:0005575_GO:0005576_GO:0043167_GO:0043169_GO:0046872	NULL	NULL	NULL	NULL	0.105503	5843.01	NULL	5451.47	6925.61	6068.66	6418.1	6142.59	6283.25	6125.81	5658.87	5780.64	5365.48	4241.46	5851.27	5645.95
PR_71148	PREDICTED: similar to MGC131082 protein [Danio rerio]	NULL	GO:0003674_GO:0003824	NULL	NULL	NULL	NULL	0.105533	3025.89	NULL	2989.23	2317.78	2912.02	3531.71	3254.89	2883.41	2892.06	2999.74	2661.09	2939.3	3482.1	3124.4	3348.86
PR_82626		NULL	NULL	NULL	NULL	NULL	NULL	0.105696	11596.9	NULL	11491.8	12754.1	11275.3	9734.73	8365.19	11699.3	11913.8	12459.2	12750.2	11515.3	12264.1	11708.3	12828.9
PR_81663	chitinase domain-containing protein 1 [Culex pipiens quinquefasciatus]	NULL	NULL	NULL	NULL	NULL	NULL	0.105795	3856.56	NULL	4055.35	4147.52	3522.73	3296.74	3509.68	4066.04	3837.51	3840.52	4093.39	4033.04	4063.54	4646.74	3022.44
PR_76576	mucolipin 2 [Danio rerio]	NULL	NULL	NULL	NULL	NULL	NULL	0.105801	1492.25	NULL	1496.49	1283.34	1512.12	1715.58	1500.19	1363.46	1595.2	1407.08	1722.05	1725.29	1406.26	1208.95	1463.22
PR_75777	predicted protein [Laccaria bicolor S238N-H82]	NULL	GO:0000105_GO:0003674_GO:0003824_GO:0004635_GO:0004636_GO:0006082_GO:0006519_GO:0006520_GO:0006547_GO:0006807_GO:0008150_GO:0008152_GO:0008652_GO:0009058_GO:0009075_GO:0009076_GO:0009308_GO:0009309_GO:0009987_GO:0016462_GO:0016787_GO:0016810_GO:0016814_GO:0016817_GO:0016818_GO:0019238_GO:0019752_GO:0034641_GO:0044237_GO:0044238_GO:0044249_GO:0044271	NULL	NULL	NULL	NULL	0.105926	1851.1	NULL	2155.73	2105.32	1902.6	1557.05	1528.32	1712.5	1704.39	1726.01	1908.41	1807.33	1961.38	1870.33	2124.9
PR_73817	predicted protein [Ostreococcus lucimarinus CCE9901]	NULL	NULL	NULL	NULL	NULL	NULL	0.105997	5482.99	NULL	5357.84	5584.75	5687.56	5721.58	5611.56	5498.55	4884.46	4731.26	5246.43	4943.38	7170.45	5171.82	5669.19
PR_71506	glyceraldehyde-3-phosphate dehydrogenase [Achlya bisexualis]	NULL	GO:0003674_GO:0003824_GO:0004365_GO:0005488_GO:0005975_GO:0005996_GO:0006006_GO:0006066_GO:0008150_GO:0008152_GO:0008943_GO:0009987_GO:0016491_GO:0016620_GO:0016903_GO:0019318_GO:0044237_GO:0044238_GO:0044262_GO:0048037_GO:0050662_GO:0051287	NULL	NULL	NULL	NULL	0.106042	20041.4	NULL	19154.8	19758.8	20976.3	22836.8	17577.1	16280.5	20636.7	21809.3	19770.9	18570.9	17425.8	22433.6	23307.3
PR_76450	predicted protein [Nematostella vectensis]	NULL	GO:0003674_GO:0003824_GO:0004576_GO:0004579_GO:0005575_GO:0005622_GO:0005623_GO:0005737_GO:0005783_GO:0005789_GO:0005975_GO:0006464_GO:0006486_GO:0006487_GO:0008150_GO:0008152_GO:0009058_GO:0009059_GO:0009100_GO:0009101_GO:0009987_GO:0012505_GO:0016020_GO:0016740_GO:0016757_GO:0016758_GO:0018193_GO:0018196_GO:0018279_GO:0019538_GO:0031090_GO:0034645_GO:0034960_GO:0042175_GO:0043170_GO:0043226_GO:…	NULL	NULL	NULL	NULL	0.106114	10208.6	NULL	10572.5	10394.1	9209.31	8622.71	9267.4	10815.7	9097.08	11716.5	9843.03	11996.4	11882.1	9487.82	9807.26
PR_74921	DNA replication licensing factor [Cryptosporidium hominis TU502]	NULL	GO:0000166_GO:0003674_GO:0003676_GO:0003677_GO:0005488_GO:0005524_GO:0005575_GO:0005622_GO:0005623_GO:0005634_GO:0006139_GO:0006259_GO:0006260_GO:0006261_GO:0006270_GO:0008150_GO:0008152_GO:0009058_GO:0009059_GO:0009987_GO:0017076_GO:0030554_GO:0032553_GO:0032555_GO:0032559_GO:0034645_GO:0034960_GO:0034961_GO:0043170_GO:0043226_GO:0043227_GO:0043229_GO:0043231_GO:0043283_GO:0043284_GO:0044237_GO:…	NULL	NULL	NULL	NULL	0.106169	4096.85	NULL	4110.19	4932.93	4464.5	4810.55	4143.07	3789.92	3973.44	4113.69	4157.56	3783.88	3935.95	3849.32	3194.05
PR_93449		NULL	NULL	NULL	NULL	NULL	NULL	0.106218	7611.51	NULL	6679.61	8488.5	7961.43	7261.79	8204.66	8139.41	9341.11	7718.12	7930.63	6876.19	7168.5	6423.6	6756.11
PR_72995	RWP-RK transcription factor [Chlamydomonas reinhardtii]	NULL	NULL	NULL	NULL	NULL	NULL	0.10623	2111.05	NULL	2386.35	1854.32	1928.78	2290.55	1962.72	2009.56	2074.76	2330.95	2639.94	2022.92	2026.28	2066.14	1850.34
PR_73324		NULL	GO:0005575_GO:0005623_GO:0016020_GO:0044464	NULL	NULL	NULL	NULL	0.106291	3285.68	NULL	3231.96	3698.92	3389.56	2813.68	2549.53	3022.51	3020.12	3231.1	3700.44	3520.74	3326.48	3779.88	3428.89
PR_71529	enoyl-CoA hydratase/isomerase domain-containing protein [Dictyostelium discoideum AX4]	NULL	GO:0003674_GO:0003824_GO:0008150_GO:0008152	NULL	NULL	NULL	NULL	0.106297	1741.06	NULL	1965.05	1400.92	1557.42	1653	1714.91	1683.22	1721.24	1673.46	1755.72	1813.45	1588.84	2104.9	2001.66
PR_96761		NULL	NULL	NULL	NULL	NULL	NULL	0.106318	1320.68	NULL	1174.69	1474.62	1486.01	1188.05	1257.96	1216.17	1364.22	1480.37	1404.84	1502.89	1198.12	1061.28	1359.67
PR_95943	predicted protein [Physcomitrella patens subsp. patens]	NULL	GO:0000166_GO:0003674_GO:0003824_GO:0004672_GO:0004674_GO:0004713_GO:0005488_GO:0005524_GO:0006464_GO:0006468_GO:0006793_GO:0006796_GO:0008150_GO:0008152_GO:0009987_GO:0016301_GO:0016310_GO:0016740_GO:0016772_GO:0016773_GO:0017076_GO:0019538_GO:0030554_GO:0032553_GO:0032555_GO:0032559_GO:0034960_GO:0043170_GO:0043283_GO:0043412_GO:0043687_GO:0044237_GO:0044238_GO:0044260_GO:0044267	NULL	NULL	NULL	NULL	0.106331	4927.28	NULL	5822.11	4783.08	4984.58	5926.78	4589.34	4133.57	4967.38	4536.31	5215.66	4939.05	5281.48	4156.79	4718.52
PR_80454	Extended-synaptotagmin-1 (E-Syt1) (Protein FAM62A)	NULL	GO:0005575_GO:0005623_GO:0016020_GO:0016021_GO:0031224_GO:0044425_GO:0044464	NULL	NULL	NULL	NULL	0.106343	7082.37	NULL	6318.46	5426.97	6024	7527.75	7493.44	8038.34	6592.6	7333.88	7817.63	7067.33	7901.5	7080.37	7448.54
PR_75512		NULL	GO:0003674_GO:0005215_GO:0005337_GO:0005575_GO:0005623_GO:0006810_GO:0008150_GO:0015932_GO:0016020_GO:0022857_GO:0022891_GO:0022892_GO:0044464_GO:0051179_GO:0051234	NULL	NULL	NULL	NULL	0.106377	3015.18	NULL	3255.92	2562.96	2425.86	3006.25	3070.8	2965.9	2772.96	3193.56	3567.06	3535.28	2837.79	3112.53	2890.5
PR_45617	putative ubiquitin fusion-degradation protein [Arabidopsis thaliana]	NULL	GO:0003674_GO:0005488_GO:0006508_GO:0006511_GO:0008150_GO:0008152_GO:0009056_GO:0009057_GO:0009987_GO:0019538_GO:0019941_GO:0030163_GO:0034960_GO:0034962_GO:0043170_GO:0043283_GO:0043285_GO:0043632_GO:0044237_GO:0044238_GO:0044248_GO:0044257_GO:0044260_GO:0044265_GO:0044267_GO:0051603	NULL	NULL	NULL	NULL	0.106385	12829.3	NULL	13808.5	14001.7	12231.1	10192.1	9942.89	13930.8	12327.4	12278.2	13644.3	13588	12805.4	14472	13557.9
PR_81462		NULL	NULL	NULL	NULL	NULL	NULL	0.106401	11428.4	NULL	11102.4	9263.88	9598.9	11350.8	11810.1	10710.4	10435	12704	13390.3	12954.4	11769.3	12550.4	10928.7
PR_81526		NULL	GO:0003674_GO:0003676_GO:0003677_GO:0005488_GO:0008150_GO:0009889_GO:0010468_GO:0010556_GO:0019219_GO:0019222_GO:0031323_GO:0031326_GO:0045449_GO:0050789_GO:0050794_GO:0060255_GO:0065007_GO:0080090	NULL	NULL	NULL	NULL	0.106464	1251.11	NULL	1309.17	1096.67	1270.04	1513.43	1267.08	1066.37	1245	1272.02	1241.86	1411.06	1383.92	1151.52	1036.24
PR_78512	PREDICTED: similar to DDHD domain containing 2 [Canis familiaris]	NULL	GO:0003674_GO:0005488_GO:0043167_GO:0046872	NULL	NULL	NULL	NULL	0.106558	2928.4	NULL	2822.14	2715.42	2943.27	3528.61	3240.92	3216.55	3136.18	2797.42	2779.71	3200.17	2460.77	2832.32	2395.67
PR_84095		NULL	NULL	NULL	NULL	NULL	NULL	0.106567	5143.15	NULL	5394.61	6226.06	5225.21	4853.4	4282.78	5303.24	4947.35	4908.4	4746.41	4644.53	6275.8	5066.78	4986.43
PR_83407	MSP1 protein, putative / intramitochondrial sorting protein, putative [Arabidopsis thaliana]	NULL	GO:0000166_GO:0003674_GO:0003824_GO:0005488_GO:0005524_GO:0016462_GO:0016787_GO:0016817_GO:0016818_GO:0017076_GO:0017111_GO:0030554_GO:0032553_GO:0032555_GO:0032559	NULL	NULL	NULL	NULL	0.106591	1918.99	NULL	1738.46	2091.2	1802.34	1841.53	1406.1	1853.28	1792.81	2068.23	2079.5	2048.45	2234.97	2030.91	1959.07
PR_52084	V-ATPase subunit c'' proteolipid [Xerophyta viscosa]	NULL	GO:0003674_GO:0005215_GO:0005575_GO:0005623_GO:0006091_GO:0006119_GO:0006139_GO:0006163_GO:0006164_GO:0006753_GO:0006754_GO:0006793_GO:0006796_GO:0006810_GO:0006811_GO:0006812_GO:0006818_GO:0008150_GO:0008152_GO:0008324_GO:0009117_GO:0009141_GO:0009142_GO:0009144_GO:0009145_GO:0009150_GO:0009152_GO:0009165_GO:0009199_GO:0009201_GO:0009205_GO:0009206_GO:0009259_GO:0009260_GO:0009987_GO:0015075_GO:…	NULL	NULL	NULL	NULL	0.106613	16477.8	NULL	20759.8	16387.1	15504.2	15010.5	15640	17478.1	15457.8	13724.6	17671.6	15478.5	18721.8	16791.7	15586.2
PR_71738	Arl1-family small GTPase [Physcomitrella patens subsp. patens]	NULL	GO:0000166_GO:0003674_GO:0005488_GO:0005525_GO:0005575_GO:0005622_GO:0005623_GO:0006810_GO:0006886_GO:0007154_GO:0007165_GO:0007242_GO:0007264_GO:0008104_GO:0008150_GO:0009987_GO:0015031_GO:0017076_GO:0019001_GO:0032553_GO:0032555_GO:0032561_GO:0033036_GO:0034613_GO:0044464_GO:0045184_GO:0046907_GO:0050789_GO:0050794_GO:0051179_GO:0051234_GO:0051641_GO:0051649_GO:0065007	NULL	NULL	NULL	NULL	0.10665	3778.62	NULL	4503.02	4066.68	3679.03	4350.23	3407.52	3371.74	3574.95	3560.97	3921.68	3506.24	4392.82	3337.52	3449.62
PR_45887	MJ1332/Ygr210cp-like GTP binding protein; GTpase OBG family plus RNA binding domain TGS [Cryptosporidium parvum Iowa II]	NULL	GO:0000166_GO:0003674_GO:0005488_GO:0005525_GO:0017076_GO:0019001_GO:0032553_GO:0032555_GO:0032561	NULL	NULL	NULL	NULL	0.106666	1499.97	NULL	1673.37	1663.79	1814.32	1542.53	1357.22	1422.58	1551.07	1383.08	1364.64	1344.87	1632.34	1518.79	1230.97
PR_84955	predicted protein [Physcomitrella patens subsp. patens]	NULL	GO:0001727_GO:0003674_GO:0003824_GO:0004428_GO:0005575_GO:0005622_GO:0005623_GO:0005737_GO:0005829_GO:0005942_GO:0006629_GO:0006643_GO:0006644_GO:0006650_GO:0006793_GO:0006796_GO:0007154_GO:0007165_GO:0007242_GO:0008150_GO:0008152_GO:0009987_GO:0016301_GO:0016303_GO:0016310_GO:0016740_GO:0016772_GO:0016773_GO:0019932_GO:0030258_GO:0030384_GO:0032991_GO:0035004_GO:0043234_GO:0044237_GO:0044238_GO:…	NULL	NULL	NULL	NULL	0.106702	7453.22	NULL	6661.79	7683.11	9125.04	7305.67	7338.45	8467.07	8589.22	6888.04	7139.65	6507.27	7698.91	6657.04	6830.58
PR_80890		NULL	NULL	NULL	NULL	NULL	NULL	0.106704	3791.01	NULL	4081.42	3737.17	3633.87	3985.75	4743.69	3548.56	4302.6	3641.86	3832.37	3247.35	3768.37	3593.87	3166.23
PR_83368	predicted protein [Physcomitrella patens subsp. patens]	NULL	NULL	NULL	NULL	NULL	NULL	0.106705	5079.91	NULL	4084.08	5362.52	6187.16	5469.08	5034.88	5701.71	4522.22	5234.89	5090.21	4937.74	4319.1	4896.47	5198.77
PR_76543		NULL	GO:0003674_GO:0005488_GO:0005515	NULL	NULL	NULL	NULL	0.106724	3537.03	NULL	3717.13	4278.21	3679.98	4183.98	3295.22	3921.68	3088.31	3346.67	3313.23	3298.06	3038.86	3414.85	3405.19
PR_94805	lysyl-trna synthetase, LysRS [Chlamydomonas reinhardtii]	NULL	GO:0000166_GO:0003674_GO:0003676_GO:0003824_GO:0004812_GO:0004815_GO:0004824_GO:0005488_GO:0005524_GO:0005575_GO:0005622_GO:0005623_GO:0005737_GO:0006082_GO:0006139_GO:0006399_GO:0006412_GO:0006418_GO:0006422_GO:0006430_GO:0006519_GO:0006520_GO:0006807_GO:0008150_GO:0008152_GO:0009058_GO:0009059_GO:0009308_GO:0009987_GO:0010467_GO:0016070_GO:0016874_GO:0016875_GO:0016876_GO:0017076_GO:0019538_GO:…	NULL	NULL	NULL	NULL	0.106756	930.522	NULL	1026.46	793.718	895.657	830.665	929.849	1006.36	889.291	871.704	796.6	1157.74	1019.2	958.032	921.503
PR_71497	TatD DNase domain containing 1 [Bos taurus]	NULL	GO:0003674_GO:0003824_GO:0004518_GO:0004519_GO:0004520_GO:0004536_GO:0016787_GO:0016788_GO:0016888_GO:0016893	NULL	NULL	NULL	NULL	0.106782	3608.25	NULL	4220.89	4483.13	3793.3	3623.65	3308.58	3358.71	3771.17	3259.12	3596.51	3387.97	3718.73	3037.83	3347.61
PR_77577	PREDICTED: similar to dynein, cytoplasmic, heavy polypeptide 1 [Ornithorhynchus anatinus]	NULL	GO:0000036_GO:0000166_GO:0003674_GO:0003774_GO:0003777_GO:0003824_GO:0004175_GO:0004197_GO:0005215_GO:0005488_GO:0005515_GO:0005524_GO:0005575_GO:0005622_GO:0005623_GO:0005856_GO:0005875_GO:0006355_GO:0006508_GO:0006810_GO:0007017_GO:0007018_GO:0008134_GO:0008150_GO:0008152_GO:0008233_GO:0008234_GO:0009889_GO:0009987_GO:0010468_GO:0010556_GO:0015630_GO:0016462_GO:0016787_GO:0016817_GO:0016818_GO:…	NULL	NULL	NULL	NULL	0.10679	12234.6	NULL	11042.9	12914.9	13303	13983.7	13985.1	12371.7	11105.7	14221	11358.2	11393.8	10115.4	10885.6	12368.7
PR_71461	ribosomal protein L10 [Phytophthora lateralis]	NULL	GO:0003674_GO:0003735_GO:0005198_GO:0005575_GO:0005622_GO:0005623_GO:0005737_GO:0005840_GO:0006412_GO:0008150_GO:0008152_GO:0009058_GO:0009059_GO:0009987_GO:0010467_GO:0019538_GO:0030529_GO:0032991_GO:0034645_GO:0034960_GO:0034961_GO:0043170_GO:0043226_GO:0043228_GO:0043229_GO:0043232_GO:0043283_GO:0043284_GO:0044237_GO:0044238_GO:0044249_GO:0044260_GO:0044267_GO:0044424_GO:0044444_GO:0044464	NULL	NULL	NULL	NULL	0.106814	31492.2	NULL	28025.4	33488.3	30040.4	27529.5	33495.4	34918.4	28334.2	26523.9	30481.5	29803.4	33261.4	36193.3	37303.5
PR_85484		NULL	GO:0000166_GO:0003674_GO:0003824_GO:0005488_GO:0005975_GO:0008150_GO:0008152_GO:0016740_GO:0016772_GO:0016773_GO:0044238	NULL	NULL	NULL	NULL	0.106854	5793.29	NULL	5743.27	5454.27	6351.72	6724.8	5808.07	6432.41	6424.48	5434.19	5938.9	4823.98	5301.22	6241.72	4633.7
PR_74581		NULL	GO:0003674_GO:0005488_GO:0005575_GO:0005622_GO:0005623_GO:0008270_GO:0043167_GO:0043169_GO:0044464_GO:0046872_GO:0046914	NULL	NULL	NULL	NULL	0.106862	11435.7	NULL	13126.3	12784.4	12230.5	12443.1	11997	12626	11308.6	9830.57	9884.31	10084.6	11766.1	11241.6	9341.26
PR_79125		NULL	GO:0000166_GO:0003674_GO:0003824_GO:0004672_GO:0004674_GO:0004713_GO:0005488_GO:0005524_GO:0006464_GO:0006468_GO:0006793_GO:0006796_GO:0008150_GO:0008152_GO:0009987_GO:0016301_GO:0016310_GO:0016740_GO:0016772_GO:0016773_GO:0017076_GO:0019538_GO:0030554_GO:0032553_GO:0032555_GO:0032559_GO:0034960_GO:0043170_GO:0043283_GO:0043412_GO:0043687_GO:0044237_GO:0044238_GO:0044260_GO:0044267	NULL	NULL	NULL	NULL	0.106876	8490.76	NULL	8688.35	7863.38	9543.6	9804.77	9731.53	8457.96	9769.04	8121.69	7738.6	8301.94	7258.56	7205.32	7895.16
PR_74432	OSIGBa0143N19.10 [Oryza sativa (indica cultivar-group)]	NULL	GO:0003674_GO:0003824_GO:0016740_GO:0016757	NULL	NULL	NULL	NULL	0.106893	4372.62	NULL	4838.71	5435.49	4630.04	4645.19	3940.41	4302.49	3847.15	4692.43	4622.89	3992.57	4099.19	3738.3	4059.18
PR_76031	putative protein [Sorghum bicolor]	NULL	NULL	NULL	NULL	NULL	NULL	0.106896	733.266	NULL	727.185	717.963	699.056	714.974	712.749	677.952	636.607	639.218	684.331	796.718	883.992	898.134	743.582
PR_82278	predicted protein [Physcomitrella patens subsp. patens]	NULL	GO:0003674_GO:0005102_GO:0005179_GO:0005488_GO:0005515_GO:0005575_GO:0005576	NULL	NULL	NULL	NULL	0.106989	6245.7	NULL	6119.73	6117.45	6363.69	6429.83	6307.23	5901.29	5317.2	6025.99	6519.86	7314.73	6297.17	4922.58	7557.4
PR_72580	tryptophan synthase [Phytophthora infestans]	NULL	GO:0003674_GO:0003824_GO:0004834_GO:0006082_GO:0006519_GO:0006520_GO:0006568_GO:0006575_GO:0006576_GO:0006586_GO:0006725_GO:0006807_GO:0008150_GO:0008152_GO:0009072_GO:0009308_GO:0009987_GO:0016829_GO:0016835_GO:0016836_GO:0019752_GO:0034641_GO:0042430_GO:0042434_GO:0044237_GO:0044238_GO:0046483	NULL	NULL	NULL	NULL	0.106999	3774.64	NULL	3664.06	3492.7	3075.72	3325.6	4178.87	3946.67	3565.35	3752.62	3991.19	3794.68	3800.74	3685.05	4797.11
PR_81574		NULL	NULL	NULL	NULL	NULL	NULL	0.107015	1917.93	NULL	1939.82	1750.85	1915.38	2231.75	1835.03	1834.62	1662.18	1937.75	1839.65	2096.49	2059.68	1538.74	2291.1
PR_79358	threonyl-tRNA synthetase [Aedes aegypti]	NULL	GO:0000166_GO:0003674_GO:0003824_GO:0004812_GO:0004829_GO:0005488_GO:0005524_GO:0005575_GO:0005622_GO:0005623_GO:0005737_GO:0006082_GO:0006139_GO:0006399_GO:0006412_GO:0006418_GO:0006435_GO:0006519_GO:0006520_GO:0006807_GO:0008150_GO:0008152_GO:0009058_GO:0009059_GO:0009308_GO:0009987_GO:0010467_GO:0016070_GO:0016874_GO:0016875_GO:0016876_GO:0017076_GO:0019538_GO:0019752_GO:0030554_GO:0032553_GO:…	NULL	NULL	NULL	NULL	0.107033	9155.1	NULL	7731.56	10050.5	8206.74	7379	8619.08	8982.65	10025.4	9860.63	8894.43	10693	9470.17	8782.96	10320.1
PR_78932		NULL	GO:0003674_GO:0003824_GO:0004221_GO:0006508_GO:0006511_GO:0008150_GO:0008152_GO:0009056_GO:0009057_GO:0009987_GO:0016787_GO:0016788_GO:0016790_GO:0019538_GO:0019941_GO:0030163_GO:0034960_GO:0034962_GO:0043170_GO:0043283_GO:0043285_GO:0043632_GO:0044237_GO:0044238_GO:0044248_GO:0044257_GO:0044260_GO:0044265_GO:0044267_GO:0051603	NULL	NULL	NULL	NULL	0.107131	4670.81	NULL	5132.39	4216.06	4259.62	4899.66	5305.58	4931.62	5429.01	5040.06	4399.55	4621.04	3540.98	4459.18	4485.79
PR_71505	ribosomal protein L23 [Phytophthora infestans]	NULL	GO:0003674_GO:0003735_GO:0005198_GO:0005575_GO:0005622_GO:0005623_GO:0005737_GO:0005840_GO:0006412_GO:0008150_GO:0008152_GO:0009058_GO:0009059_GO:0009987_GO:0010467_GO:0019538_GO:0030529_GO:0032991_GO:0034645_GO:0034960_GO:0034961_GO:0043170_GO:0043226_GO:0043228_GO:0043229_GO:0043232_GO:0043283_GO:0043284_GO:0044237_GO:0044238_GO:0044249_GO:0044260_GO:0044267_GO:0044424_GO:0044444_GO:0044464	NULL	NULL	NULL	NULL	0.107132	25167.9	NULL	24955.1	23800.4	22100.2	23872.2	24485.8	21954.6	21716.7	25068.4	27462.2	24631.3	30346.7	30067.9	26721.2
PR_81376		NULL	NULL	NULL	NULL	NULL	NULL	0.107139	9876.77	NULL	10067.9	11107	9053.68	9844.2	7984.98	10275	8746.06	8722.29	9426.49	10093.3	11366	11748.9	9962.16
PR_74583		NULL	GO:0003674_GO:0003824_GO:0004175_GO:0004222_GO:0005488_GO:0006508_GO:0008150_GO:0008152_GO:0008233_GO:0008237_GO:0008270_GO:0009987_GO:0016787_GO:0019538_GO:0034960_GO:0043167_GO:0043169_GO:0043170_GO:0043283_GO:0044237_GO:0044238_GO:0044260_GO:0044267_GO:0046872_GO:0046914_GO:0070011	NULL	NULL	NULL	NULL	0.10715	8525.75	NULL	7799.36	9126.9	10023.4	8929.85	9410.39	8971.2	9001.56	7653.8	6934.16	8683.54	7440.25	9387.18	7473.23
PR_94431		NULL	GO:0003674_GO:0003824_GO:0005215_GO:0005451_GO:0005575_GO:0005623_GO:0006810_GO:0006811_GO:0006812_GO:0006814_GO:0006885_GO:0008150_GO:0008152_GO:0008324_GO:0015075_GO:0015077_GO:0015078_GO:0015291_GO:0015297_GO:0015298_GO:0015299_GO:0015300_GO:0015385_GO:0015491_GO:0015672_GO:0016020_GO:0016021_GO:0022804_GO:0022857_GO:0022890_GO:0022891_GO:0022892_GO:0030001_GO:0031224_GO:0042592_GO:0044425_GO:…	NULL	NULL	NULL	NULL	0.107217	2849.88	NULL	3070.16	3052.2	2767.53	2614.46	2778.79	2682.93	2346.63	3218.59	3326.5	2891.4	3273.5	2465.96	2559.73
PR_42765	GA17248-PA [Drosophila pseudoobscura]	NULL	GO:0003674_GO:0003824_GO:0005488_GO:0005575_GO:0005623_GO:0006725_GO:0006732_GO:0006777_GO:0008150_GO:0008152_GO:0009058_GO:0009108_GO:0009987_GO:0019008_GO:0019438_GO:0019720_GO:0032324_GO:0032991_GO:0042558_GO:0042559_GO:0043167_GO:0043234_GO:0043545_GO:0044237_GO:0044249_GO:0044464_GO:0046872_GO:0051186_GO:0051188_GO:0051536_GO:0051539_GO:0051540	NULL	NULL	NULL	NULL	0.107225	7522.9	NULL	7844.54	7370.53	8132.52	8789.59	7476.6	8789.6	7993.09	7652.94	7753.11	6654.45	6782.21	6103.02	6455.44
PR_76326		TPSI	GO:0005575_GO:0005622_GO:0005623_GO:0006139_GO:0006364_GO:0006396_GO:0008150_GO:0008152_GO:0009987_GO:0010467_GO:0016070_GO:0016072_GO:0022613_GO:0030529_GO:0030684_GO:0030688_GO:0032991_GO:0034470_GO:0034660_GO:0034960_GO:0042254_GO:0043170_GO:0043283_GO:0044085_GO:0044237_GO:0044238_GO:0044260_GO:0044424_GO:0044464	TPSI_1513	TY1_Copia	NULL	NULL	0.10727	5634.12	NULL	5662.49	6040.21	6480.04	5892.3	5539.17	4935.71	5420.09	5757.54	4665.35	4879.01	6879.82	5834.57	5257.28
PR_95573		NULL	GO:0003674_GO:0005488_GO:0005515	NULL	NULL	NULL	NULL	0.107278	7422.72	NULL	7615.85	6646.48	7522.37	9004.37	8250.4	6820.08	8177.75	7879.96	7139.1	6975.56	6427.93	7930.49	6104.98
PR_75092		NULL	NULL	NULL	NULL	NULL	NULL	0.107319	6664.23	NULL	6793.18	6707.46	5682.52	5930.12	7470.29	5987.7	5932.4	6751.68	6866.93	8112.52	5926.05	6974.46	7499.7
PR_76134		NULL	GO:0003674_GO:0005488_GO:0005529_GO:0005575_GO:0005623_GO:0016020_GO:0030246_GO:0044464	NULL	NULL	NULL	NULL	0.107349	10523.3	NULL	11143.8	10565.2	12334.8	12738.8	10178.9	9673.5	11459.1	11054.5	9427.87	9590.56	10391.6	9155.57	9089.14
PR_82424	ftsH-like protease [Pisum sativum]	NULL	GO:0000166_GO:0003674_GO:0003824_GO:0004175_GO:0004222_GO:0005488_GO:0005524_GO:0005575_GO:0005623_GO:0006508_GO:0008150_GO:0008152_GO:0008233_GO:0008237_GO:0009056_GO:0009057_GO:0009987_GO:0016020_GO:0016462_GO:0016787_GO:0016817_GO:0016818_GO:0017076_GO:0017111_GO:0019538_GO:0030163_GO:0030554_GO:0032553_GO:0032555_GO:0032559_GO:0034960_GO:0043170_GO:0043283_GO:0043285_GO:0044237_GO:0044238_GO:…	NULL	NULL	NULL	NULL	0.107404	2316.93	NULL	2133.95	2149.53	2045.46	2623.65	2451.75	2101.13	2648.81	2393.44	2271.66	2750.63	2202.59	1899.17	2448.3
PR_85512		NULL	GO:0000166_GO:0003674_GO:0005488_GO:0005524_GO:0017076_GO:0030554_GO:0032553_GO:0032555_GO:0032559	NULL	NULL	NULL	NULL	0.107414	5982.83	NULL	6150.86	5870.93	4902.66	5276.32	4934.11	5875.95	5679.09	6290.53	6239.17	6169.96	7150.83	6832.27	6404.05
PR_82616		NULL	GO:0003674_GO:0005488_GO:0005509_GO:0043167_GO:0043169_GO:0046872	NULL	NULL	NULL	NULL	0.107425	4997.7	NULL	5778.84	5487.42	6038.51	5144.21	4527.98	5048.8	4739.18	4502.26	4102.96	4827.74	4517.42	4841.81	5412.9
PR_87178		NULL	GO:0003674_GO:0005488_GO:0005515	NULL	NULL	NULL	NULL	0.107469	1836.21	NULL	1805.07	1826.82	1777.26	2035.71	2237.26	1849.12	1992.93	2016.87	1718.51	1777.97	1521.02	1832.44	1479.72
PR_72827	CG8031 CG8031-PA [Drosophila melanogaster]	NULL	NULL	NULL	NULL	NULL	NULL	0.107534	14172.9	NULL	17112.7	13372	14169.5	13387.3	13127.2	13266	14655.3	11050.4	14313.8	13897.1	16976.4	14831.8	14088.8
PR_44115	transport protein particle (TRAPP) component Bet3, putative [Arabidopsis thaliana]	NULL	NULL	NULL	NULL	NULL	NULL	0.107624	13512	NULL	14270.5	13159.5	12855.3	11031.9	13301.5	12692.9	12361.6	14857.8	15100.8	14803.6	16189.3	11288	13743.5
PR_40785	Rab family GTPase Rab8 [Fucus distichus]	NULL	GO:0000166_GO:0003674_GO:0003824_GO:0003924_GO:0005488_GO:0005515_GO:0005524_GO:0005525_GO:0005575_GO:0005622_GO:0005623_GO:0006355_GO:0006810_GO:0006886_GO:0006913_GO:0007154_GO:0007165_GO:0007242_GO:0007264_GO:0008104_GO:0008134_GO:0008150_GO:0009889_GO:0009987_GO:0010468_GO:0010556_GO:0015031_GO:0016462_GO:0016787_GO:0016817_GO:0016818_GO:0017076_GO:0017111_GO:0019001_GO:0019219_GO:0019222_GO:…	NULL	NULL	NULL	NULL	0.107639	11886.3	NULL	12712.7	13822.8	11419	10815.7	10735.7	13349.7	9663.95	10943.9	11883.1	10626	13360.7	13438.5	11749.7
PR_79888		NULL	GO:0003674_GO:0005488_GO:0005515	NULL	NULL	NULL	NULL	0.107761	5658.42	NULL	5757.53	6655.23	5392.59	6144.91	5076.97	5552.21	5516.89	6514.94	6107.39	5241.52	4540.8	6146.43	4912.1
PR_51446	serine/arginine repetitive matrix 1 [Danio rerio]	NULL	GO:0006139_GO:0006396_GO:0006397_GO:0008150_GO:0008152_GO:0009987_GO:0010467_GO:0016070_GO:0016071_GO:0034960_GO:0043170_GO:0043283_GO:0044237_GO:0044238_GO:0044260	NULL	NULL	NULL	NULL	0.107776	557.394	NULL	594.229	514.98	508.712	498.428	500.619	539.704	486.638	633.464	648.928	635.741	501.018	633.759	549.905
PR_95867	ribosomal protein L37 [Phytophthora infestans]	NULL	GO:0003674_GO:0003735_GO:0005198_GO:0005575_GO:0005622_GO:0005623_GO:0005737_GO:0005840_GO:0006412_GO:0008150_GO:0008152_GO:0009058_GO:0009059_GO:0009987_GO:0010467_GO:0019538_GO:0030529_GO:0032991_GO:0034645_GO:0034960_GO:0034961_GO:0043170_GO:0043226_GO:0043228_GO:0043229_GO:0043232_GO:0043283_GO:0043284_GO:0044237_GO:0044238_GO:0044249_GO:0044260_GO:0044267_GO:0044424_GO:0044444_GO:0044464	NULL	NULL	NULL	NULL	0.107808	30224.2	NULL	29842.6	26713.6	23326.9	29178.6	30816.3	28768	30496.1	28037.5	31096.5	30598.8	35380.8	32284.6	36374.4
PR_75996	Coproporphyrinogen oxidase CG3433-PA [Drosophila melanogaster]	NULL	GO:0003674_GO:0003824_GO:0004109_GO:0006778_GO:0006779_GO:0008150_GO:0008152_GO:0009058_GO:0009987_GO:0016491_GO:0016627_GO:0016634_GO:0033013_GO:0033014_GO:0044237_GO:0044249_GO:0046483_GO:0051186_GO:0051188	NULL	NULL	NULL	NULL	0.107811	6416.48	NULL	7536.61	5589.28	5759.44	5776.21	7092.26	6584.5	6831.43	7196.04	5865.83	6501.56	5971.24	5444.05	7265.8
PR_75579		NULL	NULL	NULL	NULL	NULL	NULL	0.107813	4613.78	NULL	4299.5	4573.89	4250.5	3782.41	5018.32	4462.15	4533.76	4829.45	5173.08	5523.15	3746.86	4948.92	4837.2
PR_53225	Succinate dehydrogenase iron-sulfur protein [Rickettsia massiliae MTU5]	NULL	GO:0003674_GO:0003824_GO:0005488_GO:0006084_GO:0006091_GO:0006099_GO:0006732_GO:0008150_GO:0008152_GO:0009055_GO:0009056_GO:0009060_GO:0009109_GO:0009987_GO:0015980_GO:0016491_GO:0044237_GO:0044248_GO:0045333_GO:0046356_GO:0051186_GO:0051187_GO:0051536_GO:0051540	NULL	NULL	NULL	NULL	0.10785	11925.4	NULL	12347.4	12431.5	10490	9453.72	12418.3	11018.5	10232	13074.1	14050.5	12315.7	12974.1	13063.5	11160.7
PR_79982	centaurin gamma 1A [Caenorhabditis elegans]	NULL	GO:0003674_GO:0005083_GO:0005096_GO:0005488_GO:0008047_GO:0008060_GO:0008150_GO:0008270_GO:0009966_GO:0010646_GO:0030234_GO:0030695_GO:0032012_GO:0032312_GO:0032318_GO:0043087_GO:0043167_GO:0043169_GO:0046578_GO:0046872_GO:0046914_GO:0050789_GO:0050790_GO:0050794_GO:0051056_GO:0051336_GO:0060589_GO:0065007_GO:0065009	NULL	NULL	NULL	NULL	0.107923	2325.7	NULL	2107.91	2709.15	2378.05	2399.7	2245.04	2422.92	2525.42	2293.77	2455.03	2374.03	2543.63	1652.29	2127.2
PR_72772	ribosomal protein L26, component of cytosolic 80S ribosome and 60S large subunit [Chlamydomonas reinhardtii]	NULL	GO:0000166_GO:0003674_GO:0003824_GO:0004672_GO:0004674_GO:0004713_GO:0005488_GO:0005524_GO:0006464_GO:0006468_GO:0006793_GO:0006796_GO:0008150_GO:0008152_GO:0009987_GO:0016301_GO:0016310_GO:0016740_GO:0016772_GO:0016773_GO:0017076_GO:0019538_GO:0030554_GO:0032553_GO:0032555_GO:0032559_GO:0034960_GO:0043170_GO:0043283_GO:0043412_GO:0043687_GO:0044237_GO:0044238_GO:0044260_GO:0044267	NULL	NULL	NULL	NULL	0.107929	2105.6	NULL	2240.74	1997.39	2018.03	1819.42	2430.61	1995.72	1913.12	2318.64	2331.38	2199.02	2282.42	2218.65	1607.64
PR_82355		NULL	NULL	NULL	NULL	NULL	NULL	0.107939	4150.26	NULL	4359.47	4844.47	4885.4	4290.61	4173.16	3899.3	3377.3	4226.99	4374.11	4071.63	4042.17	3262.45	4146.4
PR_77481		NULL	NULL	NULL	NULL	NULL	NULL	0.107985	6528.57	NULL	6219.63	5433.24	5314.44	6737.35	6847.62	6190.37	6389.55	7185.96	7653.42	6371.5	7349.86	5879.03	7299.41
PR_77271	predicted protein [Chlamydomonas reinhardtii]	NULL	GO:0006725_GO:0006732_GO:0006777_GO:0008150_GO:0008152_GO:0009058_GO:0009108_GO:0009987_GO:0019438_GO:0019720_GO:0032324_GO:0042558_GO:0042559_GO:0043545_GO:0044237_GO:0044249_GO:0051186_GO:0051188	NULL	NULL	NULL	NULL	0.108006	2326.1	NULL	2103.84	2430.94	2074.86	1872.42	2305.18	2390.99	2290.97	2478.54	2287.13	2238.71	2257.16	2956.12	2552.48
PR_96762		NULL	NULL	NULL	NULL	NULL	NULL	0.108025	1411.26	NULL	1348.53	1303.34	1418.91	1460.59	1399.57	1513	1399.03	1474.18	1329.1	1537.84	1105.71	1277.35	1779.23
PR_86215		NULL	NULL	NULL	NULL	NULL	NULL	0.108061	4323.42	NULL	4957.04	4237.69	4321.73	4096.09	3770.24	4085.12	3801.99	4145.01	4088.93	4489.02	5571.61	4132.77	4507.19
PR_82011		NULL	NULL	NULL	NULL	NULL	NULL	0.108151	2526.12	NULL	2711.82	2768.91	2767.24	2608.62	2771.15	2468.96	2399.41	2777.68	2763.48	2224.99	1889.84	2184.2	2503.3
PR_77231		NULL	NULL	NULL	NULL	NULL	NULL	0.108173	5160.62	NULL	5947.34	5532.52	4888.11	5096.36	4106.68	4419.22	5535.51	5117.91	5447.92	4857.63	6173.38	4709.38	5256.05
PR_80987		NULL	NULL	NULL	NULL	NULL	NULL	0.108184	3933.98	NULL	4150.06	4493.26	3717.6	3752.56	3219.79	3712.5	3784.99	4501.73	4462.55	4417.87	3947.68	3261.6	3719.55
PR_76874		NULL	GO:0003674_GO:0005488_GO:0005515	NULL	NULL	NULL	NULL	0.108257	1076.09	NULL	977.081	867.318	994.232	927.226	1211.79	1096.16	1132.49	1234.79	1013.36	1216.39	1181.63	1146.2	990.553
PR_73088		NULL	GO:0003674_GO:0003824_GO:0008150_GO:0008152	NULL	NULL	NULL	NULL	0.10828	1914.65	NULL	2042.72	1757.22	1566.41	2324.13	1837.72	2136.36	1831.84	1835.69	1731.75	2153.04	1953.77	2036.85	1682.91
PR_43948	predicted protein [Physcomitrella patens subsp. patens]	NULL	NULL	NULL	NULL	NULL	NULL	0.108281	7574.08	NULL	8157.04	8599.43	7373.85	7715.84	8122.03	6944.95	8452.08	7481.41	8351.81	7078.17	5442.32	7784.53	6959.58
PR_96605	predicted protein [Nematostella vectensis]	NULL	GO:0000166_GO:0003674_GO:0003774_GO:0003777_GO:0003824_GO:0005488_GO:0005524_GO:0005575_GO:0005622_GO:0005623_GO:0005856_GO:0005875_GO:0006810_GO:0007017_GO:0007018_GO:0008150_GO:0009987_GO:0015630_GO:0016462_GO:0016787_GO:0016817_GO:0016818_GO:0017076_GO:0017111_GO:0030554_GO:0030705_GO:0032553_GO:0032555_GO:0032559_GO:0032991_GO:0043226_GO:0043228_GO:0043229_GO:0043232_GO:0043234_GO:0044422_GO:…	NULL	NULL	NULL	NULL	0.108335	4243.44	NULL	4546.98	4989.23	4458.32	5024.69	4435.5	3829.74	4192.97	3993.59	3671.35	3430.02	4501.61	3912.22	4178.55
PR_94968	predicted protein [Physcomitrella patens subsp. patens]	NULL	GO:0003674_GO:0003824_GO:0005575_GO:0005622_GO:0005623_GO:0005737_GO:0005783_GO:0005789_GO:0006464_GO:0006497_GO:0006505_GO:0006506_GO:0006629_GO:0006643_GO:0006644_GO:0006650_GO:0008104_GO:0008150_GO:0008152_GO:0008610_GO:0008654_GO:0009058_GO:0009059_GO:0009987_GO:0012505_GO:0016020_GO:0016740_GO:0016757_GO:0019538_GO:0030384_GO:0031090_GO:0031224_GO:0031227_GO:0031300_GO:0033036_GO:0034645_GO:…	NULL	NULL	NULL	NULL	0.108352	7854.52	NULL	6992.47	9923.46	8729.68	7379.38	8338.97	8121.01	7592.03	8448.1	7901.69	7036.34	6530.18	7747.27	7368.23
PR_52025	ATP-binding cassette sub-family E member 1 [Toxoplasma gondii]	NULL	GO:0000166_GO:0003674_GO:0003824_GO:0005488_GO:0005524_GO:0009055_GO:0016462_GO:0016491_GO:0016787_GO:0016817_GO:0016818_GO:0016887_GO:0017076_GO:0017111_GO:0030554_GO:0032553_GO:0032555_GO:0032559_GO:0051536_GO:0051540	NULL	NULL	NULL	NULL	0.108358	9812.56	NULL	9093.52	10935.5	10987	10783.2	10029.8	7546.62	9939.16	10525	9820.06	8800.01	10582.9	8106.24	10414.3
PR_94933	TPR repeat protein [Microcystis aeruginosa NIES-843]	NULL	NULL	NULL	NULL	NULL	NULL	0.108371	7907.41	NULL	8189.97	7670.16	9419.4	9379.7	7760.49	7943.13	7499.99	6927.64	6399.14	8349.23	7175.5	7422.03	8659.91
PR_83602		NULL	NULL	NULL	NULL	NULL	NULL	0.108406	3880.48	NULL	4341.91	3454.55	3364.59	3589.16	3564.29	3464.5	3427.07	3879.83	3798.55	4262.91	4488.95	4365.05	4444.88
PR_77564		NULL	NULL	NULL	NULL	NULL	NULL	0.108435	5394.6	NULL	6088.55	6317.67	6281.64	5913.49	5393.18	5239.52	4819.98	5330.69	5282.95	4718.86	5463.41	4430.88	4848.93
PR_95994		NULL	NULL	NULL	NULL	NULL	NULL	0.108435	2104.17	NULL	1979.29	2183.31	2143.56	2086.63	2428.17	2080.24	2089.83	2209.29	2150.94	2314.87	1651.24	1651.14	2385.76
PR_82003	predicted protein [Nematostella vectensis]	NULL	GO:0003674_GO:0003824_GO:0004729_GO:0005488_GO:0005529_GO:0006778_GO:0006779_GO:0008150_GO:0008152_GO:0009055_GO:0009058_GO:0009987_GO:0016491_GO:0016627_GO:0016634_GO:0030246_GO:0033013_GO:0033014_GO:0044237_GO:0044249_GO:0046483_GO:0051186_GO:0051188	NULL	NULL	NULL	NULL	0.10847	8952.66	NULL	10242.6	9114.66	8067.45	10380	9909.65	8865.51	9825.09	9002.08	8862.41	8231.36	8293.49	8894.73	6695.51
PR_81680	PREDICTED: similar to solute carrier family 35, member E2 [Tribolium castaneum]	NULL	NULL	NULL	NULL	NULL	NULL	0.108508	6603.67	NULL	7154.56	7223.7	6384.21	6989.81	6992.47	6755.11	6645.45	5495.63	5985.99	6809.79	6128.6	8007.46	5274.9
PR_82867	predicted protein [Chlamydomonas reinhardtii]	NULL	NULL	NULL	NULL	NULL	NULL	0.108604	22949.8	NULL	23694.3	21976.3	22833.9	21539	23344.5	25199.5	27272.6	21038.8	20338.8	22047.3	28301.3	20047.9	20712.6
PR_85270		NULL	NULL	NULL	NULL	NULL	NULL	0.108608	6609.08	NULL	6736.93	5911.05	6166.78	6210.23	7413.6	6797.74	5850.86	7364.56	7819.01	7285.58	5197.56	6363.08	6801.05
PR_73855	beige protein homolog [Dictyostelium discoideum]	NULL	GO:0003674_GO:0003735_GO:0005198_GO:0005575_GO:0005622_GO:0005623_GO:0005737_GO:0005840_GO:0005856_GO:0006412_GO:0006810_GO:0006897_GO:0006909_GO:0008150_GO:0008152_GO:0009058_GO:0009059_GO:0009987_GO:0010324_GO:0010467_GO:0016043_GO:0016044_GO:0016192_GO:0019538_GO:0030529_GO:0032991_GO:0034645_GO:0034960_GO:0034961_GO:0043170_GO:0043226_GO:0043228_GO:0043229_GO:0043232_GO:0043283_GO:0043284_GO:…	NULL	NULL	NULL	NULL	0.108646	7306.98	NULL	7335.53	7692.7	7455.43	8358.93	8373.52	6507.45	7958.67	6454.02	6125.74	6364.48	6432.86	8153.23	7778.21
PR_85095		NULL	NULL	NULL	NULL	NULL	NULL	0.108673	802.368	NULL	746.867	746.077	718.816	733.615	802.643	819.959	729.524	792.747	872.601	875.68	807.725	1048.27	736.258
PR_80248	predicted protein [Physcomitrella patens subsp. patens]	NULL	NULL	NULL	NULL	NULL	NULL	0.108709	7188.25	NULL	8533.04	7023.16	6216.56	7330.93	7676.72	6284.32	6426.33	6551.97	7364.63	8659.19	6599.02	6904.47	7876.96
PR_71402	pyruvate dehydrogenase (lipoamide) alpha 1 [Gallus gallus]	NULL	GO:0003674_GO:0003824_GO:0008150_GO:0008152_GO:0016491_GO:0016624_GO:0016903	NULL	NULL	NULL	NULL	0.108794	997.675	NULL	1043.87	776.062	837.063	935.995	1090.99	903.856	1179.65	1075.52	994.572	1002.92	1104.85	1055.09	969.337
PR_85619		NULL	NULL	NULL	NULL	NULL	NULL	0.108817	808.354	NULL	833.198	937.197	811.444	743.098	603.662	802.278	844.231	925.721	860.092	771.824	799.774	880.751	695.323
PR_38691	2-oxoglutarate dehydrogenase, E1 component family protein [Tetrahymena thermophila SB210]	NULL	GO:0003674_GO:0003824_GO:0008150_GO:0008152_GO:0016491_GO:0016624_GO:0016903	NULL	NULL	NULL	NULL	0.108818	7365.71	NULL	7533.45	7252.01	7006.65	6614.26	8144.17	7696.76	7791.34	8122.65	8084.5	7500.72	5246.45	8129.18	6632.09
PR_71275	PREDICTED: similar to FX protein [Ornithorhynchus anatinus]	NULL	GO:0003674_GO:0003824_GO:0008150_GO:0008152_GO:0016491	NULL	NULL	NULL	NULL	0.108823	2740.08	NULL	2689.81	2694.69	2927.53	2805.39	3125.78	2276.48	2510.56	2825.96	2521.82	2850.33	2158.18	3066.13	3168.38
PR_83026	predicted protein [Physcomitrella patens subsp. patens]	NULL	GO:0000166_GO:0003674_GO:0003824_GO:0004672_GO:0004674_GO:0004713_GO:0005488_GO:0005524_GO:0006464_GO:0006468_GO:0006793_GO:0006796_GO:0007154_GO:0007165_GO:0008150_GO:0008152_GO:0009987_GO:0016301_GO:0016310_GO:0016740_GO:0016772_GO:0016773_GO:0017076_GO:0019538_GO:0030554_GO:0032553_GO:0032555_GO:0032559_GO:0034960_GO:0043170_GO:0043283_GO:0043412_GO:0043687_GO:0044237_GO:0044238_GO:0044260_GO:…	NULL	NULL	NULL	NULL	0.108892	18269.7	NULL	16375.8	18889.7	21589.5	21891.3	20138	15017.5	17248.1	18451.9	16853.4	16597.3	17552.6	17264.1	19637.5
PR_93894	50S ribosomal protein L1 [Oceanicola batsensis HTCC2597]	NULL	GO:0003674_GO:0003676_GO:0003723_GO:0003735_GO:0003824_GO:0004077_GO:0005198_GO:0005488_GO:0005575_GO:0005622_GO:0005623_GO:0005737_GO:0005840_GO:0006139_GO:0006396_GO:0006412_GO:0006464_GO:0008150_GO:0008152_GO:0009058_GO:0009059_GO:0009987_GO:0010467_GO:0015934_GO:0016070_GO:0016874_GO:0016879_GO:0018271_GO:0019538_GO:0030529_GO:0032991_GO:0033279_GO:0034645_GO:0034960_GO:0034961_GO:0043170_GO:…	NULL	NULL	NULL	NULL	0.108921	5808.93	NULL	5764.14	5348.96	5713.52	5605.94	5291.56	5760.07	4937.66	5534.66	6106.48	6271.56	6293.22	5327.96	7560.39
PR_71719	delta-12 desaturase [Saprolegnia diclina]	NULL	GO:0003674_GO:0003824_GO:0006629_GO:0008150_GO:0008152_GO:0016491_GO:0044238	NULL	NULL	NULL	NULL	0.108936	17687.3	NULL	15973.9	17803.2	18403.6	17791.3	15401.1	19580.2	19783.5	19136.1	17073.2	21005.2	14692.6	14779.8	18511
PR_95113		NULL	NULL	NULL	NULL	NULL	NULL	0.108936	11361.3	NULL	8940.83	12418.3	13985.3	12498.6	10055.7	12182.1	10340.8	11188.9	10687.4	11451.5	12058.3	11026.8	10862.3
PR_83434		NULL	NULL	NULL	NULL	NULL	NULL	0.108996	12717.6	NULL	12915.3	14102.3	13160.7	13658.4	10183.2	11182.5	11160.1	13349.2	14215.8	10795.9	13048	14788.3	12768.9
PR_79605		NULL	NULL	NULL	NULL	NULL	NULL	0.109001	4806.39	NULL	4347.99	4744.79	4805.17	5464.88	4157.01	3894.46	5173.21	4669.64	5215.03	4360.39	5740.66	4614.93	5294.88
PR_72303	vacuolar ATPase B subunit [Blastocystis hominis]	NULL	GO:0003674_GO:0003824_GO:0005215_GO:0005575_GO:0005623_GO:0006091_GO:0006119_GO:0006139_GO:0006163_GO:0006164_GO:0006753_GO:0006754_GO:0006793_GO:0006796_GO:0006810_GO:0006811_GO:0006812_GO:0006818_GO:0008150_GO:0008152_GO:0008324_GO:0009117_GO:0009141_GO:0009142_GO:0009144_GO:0009145_GO:0009150_GO:0009152_GO:0009165_GO:0009199_GO:0009201_GO:0009205_GO:0009206_GO:0009259_GO:0009260_GO:0009987_GO:…	NULL	NULL	NULL	NULL	0.109007	8650.64	NULL	9221.48	8645.01	10026.2	8512.63	9167.16	7814.04	7832.88	9217.4	9597.63	9132.68	6709.8	7239.35	9342.08
PR_71146	putative 26S protease regulatory subunit 6A [Toxoptera citricida]	NULL	GO:0000166_GO:0003674_GO:0003824_GO:0005488_GO:0005524_GO:0005575_GO:0005622_GO:0005623_GO:0005634_GO:0005737_GO:0008150_GO:0008152_GO:0009056_GO:0009057_GO:0016462_GO:0016787_GO:0016817_GO:0016818_GO:0017076_GO:0017111_GO:0019538_GO:0030163_GO:0030554_GO:0032553_GO:0032555_GO:0032559_GO:0043170_GO:0043226_GO:0043227_GO:0043229_GO:0043231_GO:0043283_GO:0043285_GO:0044238_GO:0044424_GO:0044464	NULL	NULL	NULL	NULL	0.109057	11550.3	NULL	11650.3	11285	11287.1	10575.3	9864.42	11452.4	11197.7	11190.3	11900.6	13028.7	12508.5	9599.46	14614.4
PR_76436		NULL	NULL	NULL	NULL	NULL	NULL	0.109106	6221.22	NULL	5650.17	6218.42	7102.9	6721.67	7632.61	6420.45	6407.63	6241.67	5686.62	5999.24	6074.66	4756.4	5963.46
PR_85333	cathepsin-like cysteine protease [Phytophthora infestans]	NULL	GO:0003674_GO:0003824_GO:0004175_GO:0004197_GO:0006508_GO:0008150_GO:0008152_GO:0008233_GO:0008234_GO:0009987_GO:0016787_GO:0019538_GO:0034960_GO:0043170_GO:0043283_GO:0044237_GO:0044238_GO:0044260_GO:0044267_GO:0070011	NULL	NULL	NULL	NULL	0.109116	15567.2	NULL	13334.1	18506.3	15315.4	12942.3	14049.6	14531.1	16930	18399	17059.7	16039.7	14583	15621.8	15062
PR_71638	putative elicitin protein RAM1B [Phytophthora ramorum]	NULL	GO:0005575_GO:0005576_GO:0006950_GO:0006952_GO:0008150_GO:0009405_GO:0044403_GO:0044419_GO:0050896_GO:0051704	NULL	NULL	NULL	NULL	0.109239	43080.2	NULL	47896.3	34569	43041.7	49350.7	48382.4	43681.8	49282	39352.4	40910.9	44195	43887.8	35670.3	39822.7
PR_75571		NULL	NULL	NULL	NULL	NULL	NULL	0.109276	714.614	NULL	774.357	568.814	664.759	760.612	697.201	816.799	675.165	741.246	698.068	791.685	828.489	688.438	584.348
PR_73792		NULL	GO:0003674_GO:0003824_GO:0005975_GO:0008150_GO:0008152_GO:0016740_GO:0016772_GO:0016773_GO:0044238	NULL	NULL	NULL	NULL	0.109276	3514.59	NULL	3941.59	3834.43	3730.48	3861.6	3164.18	2657.96	3319.31	4062.34	3648.17	3046.92	3360.95	3458.67	3603
PR_82343		NULL	GO:0003674_GO:0003824_GO:0008150_GO:0008152_GO:0009987_GO:0016491_GO:0016667_GO:0016670_GO:0016972_GO:0019725_GO:0042592_GO:0045454_GO:0050789_GO:0050794_GO:0055114_GO:0065007_GO:0065008	NULL	NULL	NULL	NULL	0.10931	4384.66	NULL	4092.62	4490.43	4484.14	4592.33	5096.01	4101.49	4527.01	5180.28	4297.14	4514.77	3838.81	3263.93	4521.61
PR_87756	predicted protein [Nematostella vectensis]	NULL	GO:0003674_GO:0003676_GO:0003824_GO:0004518_GO:0004527_GO:0005488_GO:0005575_GO:0005622_GO:0005623_GO:0006139_GO:0008150_GO:0008152_GO:0008408_GO:0009987_GO:0016787_GO:0016788_GO:0044237_GO:0044238_GO:0044464	NULL	NULL	NULL	NULL	0.10933	2308.45	NULL	2516.74	2245.68	2264.13	2545.82	2555.87	2294.77	2541.48	2244.74	1814.49	2344.76	2515.47	1751.55	2374.38
PR_53706	Glycosyl transferase family protein [Tetrahymena thermophila SB210]	NULL	GO:0003674_GO:0003824_GO:0005575_GO:0005623_GO:0008963_GO:0016020_GO:0016021_GO:0016740_GO:0016772_GO:0016780_GO:0031224_GO:0044425_GO:0044464	NULL	NULL	NULL	NULL	0.109352	4502.71	NULL	5231.51	4784.01	4408.28	4559.28	4197.39	3765.78	4455.38	4912.28	4968.89	4684.35	4493.92	3316.32	4757.9
PR_79507	predicted protein [Physcomitrella patens subsp. patens]	NULL	GO:0003674_GO:0003824_GO:0008150_GO:0008152	NULL	NULL	NULL	NULL	0.109363	18518.7	NULL	18290	17822.5	19454.2	20662.1	19018.8	20842.3	21410	17315	17493.3	19409.6	17115.5	13225.6	18684.8
PR_73133		NULL	NULL	NULL	NULL	NULL	NULL	0.109382	6526.39	NULL	6670.23	7047.7	6558.52	7430.44	6704.85	7600.32	6278.93	6712.53	6016.92	5192	7057.36	5147.71	6425.49
PR_82938		NULL	GO:0003674_GO:0003824_GO:0005975_GO:0005984_GO:0005991_GO:0005992_GO:0008150_GO:0008152_GO:0009058_GO:0009987_GO:0016051_GO:0034637_GO:0044237_GO:0044238_GO:0044249_GO:0044262_GO:0046351	NULL	NULL	NULL	NULL	0.109399	9795.79	NULL	9817.3	10581	11137.2	10730.7	10499.3	9239.42	9110.47	9997.44	8834.87	10129.5	8011.01	7889.58	11367.6
PR_84667	predicted protein [Monosiga brevicollis MX1]	NULL	NULL	NULL	NULL	NULL	NULL	0.109405	17575.9	NULL	16466.9	14552.1	17379.6	16128.7	15792.2	19060.3	16245.9	18826.1	19448.3	22354.8	17592.6	16889.5	17749.9
PR_73976		NULL	NULL	NULL	NULL	NULL	NULL	0.109443	3405.55	NULL	3954.65	3461.29	2741.73	2861.34	3485.45	2896.86	3435.91	3526.44	3827.6	3926.02	3499.7	3244.72	3410.37
PR_71244	predicted protein [Ostreococcus lucimarinus CCE9901]	NULL	GO:0000166_GO:0003674_GO:0005488_GO:0005525_GO:0005575_GO:0005622_GO:0005623_GO:0006810_GO:0006886_GO:0007154_GO:0007165_GO:0007242_GO:0007264_GO:0008104_GO:0008150_GO:0009987_GO:0015031_GO:0017076_GO:0019001_GO:0032553_GO:0032555_GO:0032561_GO:0033036_GO:0034613_GO:0044464_GO:0045184_GO:0046907_GO:0050789_GO:0050794_GO:0051179_GO:0051234_GO:0051641_GO:0051649_GO:0065007	NULL	NULL	NULL	NULL	0.109446	17657.7	NULL	14455.1	16205	14830.3	16467.4	16718.6	17781.5	19043.9	19674.1	19970.8	20046.2	16748.9	17163.6	20444.2
PR_73613		NULL	NULL	NULL	NULL	NULL	NULL	0.109447	217.996	NULL	184.165	169.796	231.589	236.559	208.601	224.517	207.189	256.627	232.109	240.478	238.571	199.109	204.638
PR_46579	DNA replication licensing factor Mcm7, putative [Neosartorya fischeri NRRL 181]	NULL	GO:0000166_GO:0003674_GO:0003676_GO:0003677_GO:0003824_GO:0005488_GO:0005524_GO:0005575_GO:0005622_GO:0005623_GO:0005634_GO:0006139_GO:0006259_GO:0006260_GO:0006261_GO:0006270_GO:0008150_GO:0008152_GO:0009058_GO:0009059_GO:0009987_GO:0016462_GO:0016787_GO:0016817_GO:0016818_GO:0017076_GO:0017111_GO:0030554_GO:0032553_GO:0032555_GO:0032559_GO:0034645_GO:0034960_GO:0034961_GO:0043170_GO:0043226_GO:…	NULL	NULL	NULL	NULL	0.10945	5542.73	NULL	6120.88	6031.55	6655.13	5865.27	5061.52	5496.53	5095.67	5105.95	4378.65	4930.96	5577.96	6257.3	5478.1
PR_81966		NULL	GO:0000166_GO:0003674_GO:0003676_GO:0003677_GO:0005488_GO:0005515_GO:0005525_GO:0005575_GO:0005622_GO:0005623_GO:0005634_GO:0006139_GO:0006350_GO:0006605_GO:0006612_GO:0006613_GO:0006614_GO:0006810_GO:0006886_GO:0008104_GO:0008150_GO:0008152_GO:0009058_GO:0009059_GO:0009987_GO:0010467_GO:0015031_GO:0017076_GO:0019001_GO:0030528_GO:0032553_GO:0032555_GO:0032561_GO:0033036_GO:0034613_GO:0034645_GO:…	NULL	NULL	NULL	NULL	0.109462	2690.59	NULL	3406.97	2879.98	2751.87	2583.51	2715.15	2868.16	2623.84	2213.73	2422.28	2427.95	2378.66	2917.89	2787.67
PR_82813	predicted protein [Physcomitrella patens subsp. patens]	NULL	GO:0000166_GO:0003674_GO:0003824_GO:0004672_GO:0004674_GO:0005488_GO:0005524_GO:0006464_GO:0006468_GO:0006793_GO:0006796_GO:0008150_GO:0008152_GO:0009987_GO:0016301_GO:0016310_GO:0016740_GO:0016772_GO:0016773_GO:0017076_GO:0019538_GO:0030554_GO:0032553_GO:0032555_GO:0032559_GO:0034960_GO:0043170_GO:0043283_GO:0043412_GO:0043687_GO:0044237_GO:0044238_GO:0044260_GO:0044267	NULL	NULL	NULL	NULL	0.10949	5691.96	NULL	6749.71	6030.36	5659.8	6435.44	5412.71	6493.12	6068.77	5847.12	5394.05	4786.57	4984.82	5370.74	4762.26
PR_73761	nonribosomal peptide synthetase [Streptomyces atroolivaceus]	NULL	GO:0000036_GO:0003674_GO:0003824_GO:0005215_GO:0005488_GO:0005496_GO:0008150_GO:0008152_GO:0008289_GO:0009058_GO:0016740_GO:0016769_GO:0019842_GO:0022892_GO:0030170_GO:0031177_GO:0048037_GO:0070279	NULL	NULL	NULL	NULL	0.109579	8852.11	NULL	10581.8	7651.25	9601.56	9854.78	9127.35	9351.5	9355.51	8602.86	8136.38	9735.9	8015.94	7297.97	7764.67
PR_80650		NULL	GO:0003674_GO:0003824_GO:0004112_GO:0004114_GO:0007154_GO:0007165_GO:0008081_GO:0008150_GO:0009987_GO:0016787_GO:0016788_GO:0042578_GO:0050789_GO:0050794_GO:0065007	NULL	NULL	NULL	NULL	0.109622	2153.11	NULL	2092.21	2549.87	1950.29	2250.84	2201.23	1823.85	2234.97	2055.5	2436.36	2170.33	1801.49	1916.43	2507.05
PR_93878	annexin [Saprolegnia monoica]	NULL	GO:0003674_GO:0005488_GO:0005509_GO:0005543_GO:0005544_GO:0008150_GO:0008289_GO:0043167_GO:0043169_GO:0046872_GO:0048519_GO:0050789_GO:0050818_GO:0050819_GO:0051239_GO:0051241_GO:0065007	NULL	NULL	NULL	NULL	0.10965	22815.5	NULL	21755.8	18547.1	23649.2	18755.3	28014.5	23767.3	23613.2	20138.8	22493.8	23301.3	25528.2	23974.3	23062.8
PR_72738	cytochrome c heme lyase [Chlamydomonas reinhardtii]	NULL	GO:0003674_GO:0003824_GO:0004408_GO:0005575_GO:0005622_GO:0005623_GO:0005737_GO:0005739_GO:0016829_GO:0016846_GO:0043226_GO:0043227_GO:0043229_GO:0043231_GO:0044424_GO:0044444_GO:0044464	NULL	NULL	NULL	NULL	0.109674	2197.91	NULL	1995.57	2243.07	2169.08	2344.32	1782.41	2210.54	1921	2437.05	2156.01	1873.36	2627.74	2455.05	2357.62
PR_54113	serine/threonine kinase 25 [Danio rerio]	NULL	GO:0000166_GO:0003674_GO:0003824_GO:0004672_GO:0004674_GO:0004713_GO:0005488_GO:0005524_GO:0006464_GO:0006468_GO:0006793_GO:0006796_GO:0008150_GO:0008152_GO:0009987_GO:0016301_GO:0016310_GO:0016740_GO:0016772_GO:0016773_GO:0017076_GO:0019538_GO:0030554_GO:0032553_GO:0032555_GO:0032559_GO:0034960_GO:0043170_GO:0043283_GO:0043412_GO:0043687_GO:0044237_GO:0044238_GO:0044260_GO:0044267	NULL	NULL	NULL	NULL	0.109706	7616.22	NULL	7894.41	8101.43	8396.29	7533.58	7722.15	7504.87	7404.9	7968.75	8428.85	7189.03	8368.1	5063.99	7434.55
PR_79552		NULL	NULL	NULL	NULL	NULL	NULL	0.109777	5084.07	NULL	4499.13	4677.82	5489.6	5518.77	4241.58	5476.23	5387.59	5567.17	4919.83	5564.58	4233.1	4567.13	5950.33
PR_85123		NULL	GO:0005575_GO:0005622_GO:0005623_GO:0044464	NULL	NULL	NULL	NULL	0.109847	2898.56	NULL	3073.95	3479.25	2731.5	3130.63	2876.06	3173.9	2960.12	2501.29	2584.39	2917.72	3294.36	2585.35	2372.8
PR_79725		NULL	NULL	NULL	NULL	NULL	NULL	0.10997	9460.48	NULL	9883.2	8733.97	7706.38	9154.03	9677.12	10607.5	9141.06	9937.2	10128.1	10827.1	8608.37	10935	7647.23
PR_76931	PREDICTED: similar to CG33249-PA [Tribolium castaneum]	NULL	NULL	NULL	NULL	NULL	NULL	0.109979	1311.81	NULL	1223.07	1361.97	1286.29	1355.62	1545.29	1450.41	1494.47	1320.42	1413.39	1217.55	1252.26	1126.72	1006.1
PR_71852	thioredoxin peroxidase [Phytophthora infestans]	NULL	GO:0003674_GO:0003824_GO:0016209_GO:0016491	NULL	NULL	NULL	NULL	0.110029	17068	NULL	16246.8	14133.8	15465.1	16132.9	16293.2	18608.1	16931.3	17665.8	15234.4	16784.2	19103.3	21755.7	17529
PR_73982		NULL	NULL	NULL	NULL	NULL	NULL	0.11004	5996.73	NULL	7086.2	5755.36	6215.02	7091.8	6468.66	6371.79	5243.69	5136.91	5789.1	5282.29	6600.34	5480.16	5436.17
PR_80790		NULL	NULL	NULL	NULL	NULL	NULL	0.110071	2101.43	NULL	2250.16	2153.08	2320.48	2312.05	1774.37	1885.6	1846.11	2394.2	1950.49	1933.29	2532.29	1915.03	2051.45
PR_41309	mKIAA1595 protein [Mus musculus]	NULL	GO:0000166_GO:0003674_GO:0003676_GO:0003824_GO:0004386_GO:0005488_GO:0005524_GO:0008026_GO:0016462_GO:0016787_GO:0016817_GO:0016818_GO:0016887_GO:0017076_GO:0017111_GO:0030554_GO:0032553_GO:0032555_GO:0032559_GO:0042623_GO:0070035	NULL	NULL	NULL	NULL	0.110085	1751.77	NULL	2040.3	1764.34	1820.93	1992.49	1765.58	1866.73	1770.73	1575.12	1488.63	1868.06	1872	1616.89	1331.15
PR_74092		NULL	GO:0005575_GO:0005622_GO:0005623_GO:0005737_GO:0005783_GO:0005789_GO:0006464_GO:0006497_GO:0006505_GO:0006506_GO:0006629_GO:0006643_GO:0006644_GO:0006650_GO:0008150_GO:0008152_GO:0008610_GO:0008654_GO:0009058_GO:0009059_GO:0009987_GO:0012505_GO:0016020_GO:0016021_GO:0019538_GO:0030384_GO:0031090_GO:0031224_GO:0034645_GO:0034960_GO:0042157_GO:0042158_GO:0042175_GO:0043170_GO:0043226_GO:0043227_GO:…	NULL	NULL	NULL	NULL	0.110133	11490.8	NULL	13143.8	12346.2	12906.9	13961.4	10157	11805.7	9665.96	11283.2	10959	10516.6	11534.4	11254.7	9845.8
PR_96951		NULL	GO:0000166_GO:0003674_GO:0003824_GO:0004180_GO:0004185_GO:0004672_GO:0004674_GO:0004713_GO:0005488_GO:0005524_GO:0006464_GO:0006468_GO:0006508_GO:0006793_GO:0006796_GO:0008150_GO:0008152_GO:0008233_GO:0008236_GO:0008238_GO:0009987_GO:0016301_GO:0016310_GO:0016740_GO:0016772_GO:0016773_GO:0016787_GO:0017076_GO:0017171_GO:0019538_GO:0030554_GO:0032553_GO:0032555_GO:0032559_GO:0034960_GO:0043170_GO:…	NULL	NULL	NULL	NULL	0.110178	4654.87	NULL	4345.17	4947.39	5475.07	5437.22	4181.92	3873.97	4938.99	4480.89	4709.69	4261.47	4436.06	4081.73	5343.7
PR_75891	predicted protein [Nematostella vectensis]	NULL	GO:0000166_GO:0003674_GO:0003824_GO:0004812_GO:0005488_GO:0005524_GO:0005575_GO:0005622_GO:0005623_GO:0005737_GO:0006082_GO:0006139_GO:0006399_GO:0006412_GO:0006418_GO:0006519_GO:0006520_GO:0006807_GO:0008150_GO:0008152_GO:0009058_GO:0009059_GO:0009308_GO:0009987_GO:0010467_GO:0016070_GO:0016462_GO:0016787_GO:0016817_GO:0016818_GO:0016874_GO:0016875_GO:0016876_GO:0016887_GO:0017076_GO:0017111_GO:…	NULL	NULL	NULL	NULL	0.110183	10709.5	NULL	9318.41	10672.9	10003.5	12960.3	10442.1	11601.6	10379.2	11505.6	12040.4	10337.8	9043.96	9012.96	11904.8
PR_75299		NULL	NULL	NULL	NULL	NULL	NULL	0.110184	7213.07	NULL	7698.7	7279.91	6091.43	7437.7	6392.43	7543.57	7209.7	7024.09	7666.25	7850.17	8940.2	5749	6886.73
PR_81703	ACBP1 (ACYL-COA BINDING PROTEIN) [Arabidopsis thaliana]	NULL	GO:0000062_GO:0003674_GO:0005488_GO:0005504_GO:0008289_GO:0048037_GO:0050662	NULL	NULL	NULL	NULL	0.11019	7987.79	NULL	8538.03	7363.71	9651.46	7982.67	7214.46	8756.26	8139.97	6588.1	7984.53	7554.32	7748.01	9411.99	6907.73
PR_71769	calcium-transporting ATPase, endoplasmic reticulum-type [Chlamydomonas reinhardtii]	NULL	GO:0000166_GO:0003674_GO:0003824_GO:0005215_GO:0005388_GO:0005488_GO:0005524_GO:0005575_GO:0005623_GO:0006139_GO:0006163_GO:0006164_GO:0006753_GO:0006754_GO:0006810_GO:0006811_GO:0006812_GO:0006816_GO:0008150_GO:0008152_GO:0008324_GO:0009117_GO:0009141_GO:0009142_GO:0009144_GO:0009145_GO:0009150_GO:0009152_GO:0009165_GO:0009199_GO:0009201_GO:0009205_GO:0009206_GO:0009259_GO:0009260_GO:0009987_GO:…	NULL	NULL	NULL	NULL	0.110194	16522.3	NULL	15210.3	17597.2	15876.2	14436.3	17106.6	16028.2	18025.8	16850	15640	16598.9	13445.5	16741.4	21233.4
PR_81903	bifunctional dihydrofolate reductase-thymidylate synthase 2 / DHFR-TS (ISS) [Ostreococcus tauri]	NULL	GO:0003674_GO:0003824_GO:0004146_GO:0004799_GO:0006082_GO:0006139_GO:0006220_GO:0006221_GO:0006231_GO:0006519_GO:0006520_GO:0006544_GO:0006545_GO:0006753_GO:0006807_GO:0008150_GO:0008152_GO:0008168_GO:0008652_GO:0009058_GO:0009069_GO:0009070_GO:0009117_GO:0009123_GO:0009124_GO:0009129_GO:0009130_GO:0009157_GO:0009162_GO:0009165_GO:0009176_GO:0009177_GO:0009219_GO:0009221_GO:0009262_GO:0009263_GO:…	NULL	NULL	NULL	NULL	0.110237	6948.94	NULL	6227.59	5709.71	6064.37	5976.72	7700.72	6900.68	6733.85	8016.66	7326.03	7816.09	6642.82	7273.13	7947.9
PR_52540	aspartyl/glutamyl-tRNA amidotransferase subunit A [Roseobacter denitrificans OCh 114]	NULL	GO:0003674_GO:0003824_GO:0006412_GO:0008150_GO:0008152_GO:0009058_GO:0009059_GO:0009987_GO:0010467_GO:0016874_GO:0016879_GO:0016884_GO:0019538_GO:0034645_GO:0034960_GO:0034961_GO:0043170_GO:0043283_GO:0043284_GO:0044237_GO:0044238_GO:0044249_GO:0044260_GO:0044267	NULL	NULL	NULL	NULL	0.110237	5224.86	NULL	5735.9	6546.91	5769.78	5716.9	4605.23	5325.49	4642.44	5204.88	4749.3	4563.2	4633.9	5120.9	5308.33
PR_80329		NULL	NULL	NULL	NULL	NULL	NULL	0.110245	14572.7	NULL	12308.1	15048.2	13462.7	10990.3	14401.1	17068.8	14571.1	15812.3	16138.3	13915.9	14869.6	16403.6	14454.8
PR_93459		NULL	GO:0003674_GO:0005488_GO:0005515_GO:0005575_GO:0005622_GO:0005623_GO:0005737_GO:0005777_GO:0005778_GO:0006996_GO:0007031_GO:0008150_GO:0008270_GO:0009987_GO:0016020_GO:0016043_GO:0031090_GO:0031903_GO:0042579_GO:0043167_GO:0043169_GO:0043226_GO:0043227_GO:0043229_GO:0043231_GO:0044422_GO:0044424_GO:0044438_GO:0044439_GO:0044444_GO:0044446_GO:0044464_GO:0046872_GO:0046914	NULL	NULL	NULL	NULL	0.110286	1984.85	NULL	1914.79	1778.49	1846.1	1915.31	1679.63	2073.46	1694.12	1923.99	2017.02	2258.26	2479.5	2180.86	2041.57
PR_42772		NULL	GO:0000015_GO:0003674_GO:0003824_GO:0004634_GO:0005575_GO:0005622_GO:0005623_GO:0005737_GO:0005829_GO:0005975_GO:0005996_GO:0006006_GO:0006007_GO:0006066_GO:0006091_GO:0006096_GO:0008150_GO:0008152_GO:0009056_GO:0009057_GO:0009987_GO:0016052_GO:0016829_GO:0016835_GO:0016836_GO:0019318_GO:0019320_GO:0032991_GO:0043170_GO:0043234_GO:0044237_GO:0044238_GO:0044248_GO:0044260_GO:0044262_GO:0044265_GO:…	NULL	NULL	NULL	NULL	0.110335	19396.1	NULL	22018.8	19335.5	18374	22649	18064.1	15811.3	20042.7	17718.5	18715	17974.4	20050.3	23602.1	17793.3
PR_95501		NULL	GO:0003674_GO:0005488_GO:0005515	NULL	NULL	NULL	NULL	0.110343	2558.1	NULL	2890.34	2229.98	2333.45	2618.78	2572.37	2495.83	2311.56	2306.98	2629.5	2679.45	3278.5	2648.28	2260.23
PR_78325	predicted protein [Physcomitrella patens subsp. patens]	NULL	GO:0005575_GO:0005622_GO:0005623_GO:0005737_GO:0005783_GO:0005794_GO:0006810_GO:0006886_GO:0008104_GO:0008150_GO:0009987_GO:0015031_GO:0033036_GO:0034613_GO:0043226_GO:0043227_GO:0043229_GO:0043231_GO:0044424_GO:0044444_GO:0044464_GO:0045184_GO:0046907_GO:0051179_GO:0051234_GO:0051641_GO:0051649	NULL	NULL	NULL	NULL	0.110393	9436.07	NULL	10262.5	9148.82	8780.88	9278.96	10835.5	8850.97	7998.57	7536.28	9240.3	9481.28	11019.3	10964.5	9271.1
PR_95743		NULL	GO:0000151_GO:0003674_GO:0003824_GO:0004842_GO:0005575_GO:0005622_GO:0005623_GO:0006464_GO:0008150_GO:0008152_GO:0009987_GO:0016567_GO:0016874_GO:0016879_GO:0016881_GO:0019538_GO:0019787_GO:0032446_GO:0032991_GO:0034960_GO:0043170_GO:0043234_GO:0043283_GO:0043412_GO:0043687_GO:0044237_GO:0044238_GO:0044260_GO:0044267_GO:0044424_GO:0044464	NULL	NULL	NULL	NULL	0.110393	8526.13	NULL	8348.71	7621.49	6817.37	7707.04	9847.68	9293.25	9072.45	8609.83	8159.38	8350.06	9917.38	9627.69	7467.27
PR_71971	40S ribosomal protein S15a [Theileria parva strain Muguga]	NULL	GO:0003674_GO:0003735_GO:0005198_GO:0005575_GO:0005622_GO:0005623_GO:0005737_GO:0005840_GO:0006412_GO:0008150_GO:0008152_GO:0009058_GO:0009059_GO:0009987_GO:0010467_GO:0019538_GO:0030529_GO:0032991_GO:0034645_GO:0034960_GO:0034961_GO:0043170_GO:0043226_GO:0043228_GO:0043229_GO:0043232_GO:0043283_GO:0043284_GO:0044237_GO:0044238_GO:0044249_GO:0044260_GO:0044267_GO:0044424_GO:0044444_GO:0044464	NULL	NULL	NULL	NULL	0.110398	27038	NULL	26481.3	25494	26602.3	27000.2	27180.9	28918.7	25461.8	21971.1	22477.6	27181.6	33840.8	28306.5	30576.6
PR_77612	predicted protein [Chlamydomonas reinhardtii]	NULL	GO:0003674_GO:0003824_GO:0008150_GO:0008152_GO:0016491	NULL	NULL	NULL	NULL	0.110408	13422.9	NULL	14093.6	14821.4	12339.7	12171.5	13440.6	13502.5	11402.6	12381.4	14087.2	13906	15458.9	16035.6	10856.3
PR_80318		NULL	NULL	NULL	NULL	NULL	NULL	0.110448	6356.34	NULL	7175.42	5388.42	6531.53	5923.79	7204.31	6500.94	6897.45	6387.08	7040.36	6979.44	4883.98	5984.39	5735.3
PR_75775		NULL	GO:0000166_GO:0003674_GO:0003824_GO:0005488_GO:0008150_GO:0008152_GO:0009987_GO:0044237	NULL	NULL	NULL	NULL	0.110464	5459	NULL	5221.37	4813.7	5258.77	5190.63	5522	5572.52	6108.21	6552.2	6256.06	5853	4209.29	5088.09	5321.14
PR_71345	cellobiohydrolaseI [Polyporus arcularius]	NULL	GO:0003674_GO:0003824_GO:0004553_GO:0005975_GO:0008150_GO:0008152_GO:0016787_GO:0016798_GO:0044238	NULL	NULL	NULL	NULL	0.110494	789.555	NULL	797.548	965.189	766.671	756.594	819.032	727.31	739.717	705.243	663.035	877.516	833.404	920.161	692.801
PR_95517	predicted protein [Physcomitrella patens subsp. patens]	NULL	GO:0000166_GO:0003674_GO:0003676_GO:0003824_GO:0004386_GO:0005488_GO:0005524_GO:0016462_GO:0016787_GO:0016817_GO:0016818_GO:0017076_GO:0017111_GO:0030554_GO:0032553_GO:0032555_GO:0032559	NULL	NULL	NULL	NULL	0.110565	5791.84	NULL	6427.38	6853.16	6378.93	6319.93	6348.41	5348.49	6189.78	5680.8	5365.58	5515.53	4803.33	4798.7	5263.95
PR_71978	vacuolar sorting ATPase [Candida albicans SC5314]	NULL	GO:0000166_GO:0003674_GO:0003824_GO:0005488_GO:0005524_GO:0016462_GO:0016787_GO:0016817_GO:0016818_GO:0017076_GO:0017111_GO:0030554_GO:0032553_GO:0032555_GO:0032559	NULL	NULL	NULL	NULL	0.110574	7537.11	NULL	7535.95	8715.52	7982.47	8155.83	6910.08	8096.83	6706.19	7423.4	6713.81	8064.76	8922	6168.6	6587
PR_94824	related to TOM1 protein [Neurospora crassa]	NULL	GO:0003674_GO:0003824_GO:0005488_GO:0005575_GO:0005622_GO:0005623_GO:0006464_GO:0008150_GO:0008152_GO:0008270_GO:0009987_GO:0016874_GO:0016879_GO:0016881_GO:0019538_GO:0034960_GO:0043167_GO:0043169_GO:0043170_GO:0043283_GO:0043412_GO:0044237_GO:0044238_GO:0044260_GO:0044267_GO:0044464_GO:0046872_GO:0046914	NULL	NULL	NULL	NULL	0.110588	3990.59	NULL	3648.28	4158.99	3966.13	4035.38	3803.16	3851.74	4206.03	4457.33	4328.77	4391.23	2799.79	4528.32	3702.54
PR_71462	pyruvate dehydrogenase2 [Zea mays]	NULL	GO:0003674_GO:0003824_GO:0008150_GO:0008152	NULL	NULL	NULL	NULL	0.110594	10072.4	NULL	10160.4	9200.74	8777.24	8684.98	9710.56	10282.8	9461.23	11308.3	10085.2	11065.8	9294	9993.95	12916.1
PR_82586	pectate lyase, putative [Neosartorya fischeri NRRL 181]	NULL	GO:0003674_GO:0003824_GO:0005575_GO:0005576_GO:0016829_GO:0016835_GO:0016837_GO:0030570	NULL	NULL	NULL	NULL	0.110597	664.738	NULL	663.532	569.193	567.169	736.369	760.375	642.352	589.847	587.814	617.342	673.046	695.583	762.43	776.537
PR_93943	Os06g0681700 [Oryza sativa (japonica cultivar-group)]	NULL	GO:0005575_GO:0005623_GO:0016020_GO:0044464	NULL	NULL	NULL	NULL	0.110667	1873.8	NULL	2284.38	1468.94	1699.93	1716.46	1842.04	1883.28	1794.24	2019.48	1885.9	1637.61	2021.54	2075.65	2029.95
PR_78678		NULL	GO:0003674_GO:0003824_GO:0004175_GO:0004190_GO:0004197_GO:0006508_GO:0008150_GO:0008152_GO:0008233_GO:0008234_GO:0009987_GO:0016787_GO:0019538_GO:0034960_GO:0043170_GO:0043283_GO:0044237_GO:0044238_GO:0044260_GO:0044267_GO:0070001_GO:0070011	NULL	NULL	NULL	NULL	0.110679	341.035	NULL	275.23	391.132	289.756	348.39	337.033	322.444	337.994	327.114	395.266	302.523	392.823	377.185	336.56
PR_71716	PREDICTED: similar to MGC80929 protein isoform 1 [Strongylocentrotus purpuratus]	NULL	NULL	NULL	NULL	NULL	NULL	0.110715	11200.3	NULL	10972.3	8716.57	9422.23	11010.9	11732.4	10738.9	12855.5	12456.3	11859.2	10613.6	13092.6	10241.1	11892.9
PR_72114	beta tubulin [Phytophthora capsici]	NULL	GO:0000166_GO:0003674_GO:0003824_GO:0003924_GO:0005198_GO:0005488_GO:0005525_GO:0005575_GO:0005622_GO:0005623_GO:0005737_GO:0005856_GO:0005874_GO:0006461_GO:0006810_GO:0007017_GO:0007018_GO:0008150_GO:0009987_GO:0010926_GO:0015630_GO:0016043_GO:0016462_GO:0016787_GO:0016817_GO:0016818_GO:0017076_GO:0017111_GO:0019001_GO:0022607_GO:0030705_GO:0032553_GO:0032555_GO:0032561_GO:0032991_GO:0034621_GO:…	NULL	NULL	NULL	NULL	0.110753	15881.5	NULL	13946.5	14914.7	16354.9	15073.2	16579.1	12989	17056.7	16558.9	15847.8	18157.5	17515.1	12897.8	18568.1
PR_87257	novel protein similar to glycosyltransferases [Danio rerio]	NULL	NULL	NULL	NULL	NULL	NULL	0.110761	4506.39	NULL	4417.05	4484.07	4735.59	4158.06	5099.23	5129.38	4466.69	3902.06	4963.43	4575.39	5112.83	4145.76	3393.49
PR_83495		NULL	NULL	NULL	NULL	NULL	NULL	0.110768	2608.94	NULL	3100.58	2693.73	2308.88	2851.01	2595.13	2924.29	2799.91	2431.15	2417.32	2158.48	2915.45	2182.59	2537.76
PR_77420	calcium/calmodulin-dependent protein kinase ID isoform 2 [Homo sapiens]	NULL	GO:0000166_GO:0003674_GO:0003824_GO:0004672_GO:0004674_GO:0004713_GO:0005488_GO:0005524_GO:0005575_GO:0005622_GO:0005623_GO:0006464_GO:0006468_GO:0006793_GO:0006796_GO:0008150_GO:0008152_GO:0008270_GO:0009987_GO:0016301_GO:0016310_GO:0016740_GO:0016772_GO:0016773_GO:0017076_GO:0019538_GO:0030554_GO:0032553_GO:0032555_GO:0032559_GO:0034960_GO:0043167_GO:0043169_GO:0043170_GO:0043283_GO:0043412_GO:…	NULL	NULL	NULL	NULL	0.110768	6077.83	NULL	6320.83	6242.49	6739.44	6672.25	5573.44	6884.84	6396.66	6878.11	6214.41	5466.94	5384.99	4546.26	5691.17
PR_74910	Os05g0398100 [Oryza sativa (japonica cultivar-group)]	NULL	GO:0003674_GO:0005488_GO:0005515	NULL	NULL	NULL	NULL	0.110793	4726.95	NULL	4786.67	3920.71	4209.23	4987.58	4122.29	5133.29	5356.66	4167.43	4693.19	5161.06	4775.05	5743.28	4393.96
PR_73448		NULL	NULL	NULL	NULL	NULL	NULL	0.110803	6137.53	NULL	5984.16	7601.02	7039.01	7060.52	5638.35	6514.53	5688.23	6028.46	5336.89	5625.46	5532.82	5582.56	6155.83
PR_72003	eukaryotic translation initiation factor 2, subunit 1 alpha [Danio rerio]	NULL	GO:0003674_GO:0003676_GO:0003723_GO:0003743_GO:0005488_GO:0005575_GO:0005622_GO:0005623_GO:0005737_GO:0005850_GO:0006412_GO:0008135_GO:0008150_GO:0008152_GO:0009058_GO:0009059_GO:0009987_GO:0010467_GO:0019538_GO:0032991_GO:0034645_GO:0034960_GO:0034961_GO:0043170_GO:0043234_GO:0043283_GO:0043284_GO:0044237_GO:0044238_GO:0044249_GO:0044260_GO:0044267_GO:0044424_GO:0044444_GO:0044464_GO:0045182	NULL	NULL	NULL	NULL	0.110847	9020.35	NULL	9860.62	8075.36	7914.24	8035.72	7837.86	9470.14	8708.05	8569.48	10304.1	9500.56	10439.6	7993.48	10555.3
PR_96890		NULL	NULL	NULL	NULL	NULL	NULL	0.110886	678.928	NULL	587.694	771.955	613.907	700.009	749.068	660.314	726.085	769.769	639.665	701.694	747.106	649.276	509.519
PR_72191	PREDICTED: similar to MGC82338 protein [Strongylocentrotus purpuratus]	NULL	GO:0003674_GO:0003824_GO:0004419_GO:0016829_GO:0016830_GO:0016833	NULL	NULL	NULL	NULL	0.110922	15582.8	NULL	18924.9	14672.9	16223.8	16521.4	17100.1	16234.2	17299.2	12488.3	16499.3	14432.3	14851	14011.9	13316.9
PR_81396	microfibrillar-associated protein 1 [Danio rerio]	NULL	GO:0005575_GO:0005576	NULL	NULL	NULL	NULL	0.110935	3278.9	NULL	2816.41	3796.02	3073.1	3159.76	2820.35	3086.25	3201.57	3807.62	3594	3764.1	3211.64	2776.31	3518.61
PR_48758	CDK5 regulatory subunit associated protein 1 isoform a variant [Homo sapiens]	NULL	GO:0003674_GO:0003824_GO:0005488_GO:0051536_GO:0051540	NULL	NULL	NULL	NULL	0.110992	1748.21	NULL	2016.59	1911.42	1366.12	1634.36	1639.86	1487.3	1926.64	2062.31	1793.29	1702.24	1634.32	1813.8	1738.39
PR_79065		NULL	GO:0003674_GO:0003824_GO:0004497_GO:0005488_GO:0005506_GO:0009055_GO:0016491_GO:0020037_GO:0043167_GO:0043169_GO:0046872_GO:0046906_GO:0046914	NULL	NULL	NULL	NULL	0.111032	8477.63	NULL	7406.79	7030.14	8094.72	9034.83	8215.37	9092.49	9358.17	8480.93	8346.76	7611.46	9793.18	7496.01	10248.4
PR_82451	predicted protein [Monosiga brevicollis MX1]	NULL	GO:0003674_GO:0005488_GO:0005509_GO:0005575_GO:0005623_GO:0016020_GO:0043167_GO:0043169_GO:0044464_GO:0046872	NULL	NULL	NULL	NULL	0.111085	3610.95	NULL	3910.16	3450.33	3533.08	3289	3037.26	3241.52	3239.65	3812.82	3933.84	3587.14	4316.39	3270.36	4320.86
PR_73915		NULL	NULL	NULL	NULL	NULL	NULL	0.11115	10095	NULL	10333.1	12190.3	12011.9	9219.5	9677.82	9952.5	9026.51	8968.54	9468.43	8607.41	9585.95	11060	11133.5
PR_76872		NULL	NULL	NULL	NULL	NULL	NULL	0.111151	3424.43	NULL	3762.29	3649.35	3338.79	3509.63	3024.32	3000.54	3117.81	4085.37	3857.58	3877.06	2867.24	3358.31	3069.31
PR_95672	probable heat shock protein HI0497 - Haemophilus influenzae (strain Rd KW20)	NULL	GO:0000166_GO:0003674_GO:0003824_GO:0005488_GO:0005515_GO:0005524_GO:0005575_GO:0005622_GO:0005623_GO:0005737_GO:0008233_GO:0009376_GO:0016462_GO:0016787_GO:0016817_GO:0016818_GO:0016887_GO:0017076_GO:0017111_GO:0030554_GO:0032553_GO:0032555_GO:0032559_GO:0032991_GO:0043234_GO:0044424_GO:0044444_GO:0044464_GO:0070011	NULL	NULL	NULL	NULL	0.111201	1252.34	NULL	1418.83	1520.61	1217.96	1325.69	1150	1174.09	1075.56	1199.43	1216.35	1281.63	1271.14	1426.5	1002.57
PR_78471		NULL	GO:0003674_GO:0005488_GO:0005515_GO:0005543_GO:0007154_GO:0008150_GO:0008289_GO:0009987_GO:0035091	NULL	NULL	NULL	NULL	0.111219	1632.95	NULL	1545.21	1670.28	1424.81	1441.8	1649.83	1725.17	1682.95	1933.84	1997.95	1662.59	1547.83	1623.83	1322.18
[truncated: 11,244 more rows]

## Sheet: Readme
Author	Takao Kasuga & Mai Bui
[truncated: 30 more rows]
