# Supplementary material for: Phenotypic Diversification Is Associated with Host-Induced Transposon Derepression in the Sudden Oak Death Pathogen Phytophthora ramorum
Source: PLOS journal article supplement (doi:10.1371/journal.pone.0034728), 2012-04-18
Supplement: S6 (10.1371/journal.pone.0034728.s006) [file journal.pone.0034728.s006]

Table S3. AMOVA results for geographic populations of *P. ramorum*. A significant genetic differentiation was detected among the three geographical populations, namely Monterey, Santa Cruz and Sonoma.

| Source of variation   | df | Sum of squares | Variance components | % of variation | $\Phi_{ST}$ | P-value |
|-----------------------|----|----------------|---------------------|----------------|-------------|---------|
| Among all populations | 2  | 13.726         | 0.187               | 11.4           | 0.11425     | 0.0000  |
| Within populations    | 89 | 123.306        | 1.385               | 88.6           |             |         |

AMOVA was conducted on microsatellite multilocus genotypes to measure the genetic differentiation among populations using the program ARLEQUIN (Excoffier and Schneider, 2005). The AMOVA calculates  $\Phi_{ST}$ , an index of population subdivision. The significance of  $F_{ST}$  was tested by 10,000 permutations. All isolates in Table 1, set1 except for Pr-52, a total of 46 isolates were used. Pr-102 from Malin County was included in the Sonoma County population.
