# Supplementary material for: Phenotypic Diversification Is Associated with Host-Induced Transposon Derepression in the Sudden Oak Death Pathogen Phytophthora ramorum
Source: PLOS journal article supplement (doi:10.1371/journal.pone.0034728), 2012-04-18
Supplement: S7 (10.1371/journal.pone.0034728.s007) [file journal.pone.0034728.s007]

Table S4. AMOVA results for *P. ramorum* populations based on originating host species. Population structure was not detected among isolates originating from tanoak, coast live oak and California bay laurel.

| Source of variation   | df | Sum of squares | Variance components | % of variation | $\Phi_{ST}$ | P-value |
|-----------------------|----|----------------|---------------------|----------------|-------------|---------|
| Among all populations | 2  | 2.614          | -0.007              | -0.4           | -0.00284    | 0.62762 |
| Within populations    | 89 | 134.419        | 1.510               | 100.4          |             |         |

The same set of isolates in Table S3 were used.
